# Supplementary material for: Rationally-defined microbial consortia suppress multidrug-resistant proinflammatory Enterobacteriaceae via ecological control
Source: Research Square preprint supplement (doi:10.21203/rs.3.rs-3462622/v1), 2023-10-23
Supplement: Supplementary file 1 [file 0ccdd3a89292a3644ce049b2.xlsx]

## Sheet: homology
Homology search for gluconate metabolism genes with “blastp --evalue 0.00001 --id 20 --query-cover 60 --ultra-sensitive” options. The sequences of gluconate kinase (gntK), and high and low-affinity gluconate transporter from f37_E. coli strain, and gluconate dehydratase, high and low-affinity gluconate transporter, 2-dehydro-3-deoxygluconokinase (kdgK), and 2-dehydro-3-deoxyphosphogluconate aldol…
			Gluconokinase (gntK) homolog (reference gene)				Gluconate dehydratase (gad) homolog (reference gene)				Low-affinity gluconate Transporter (gntU) homolog (reference gene)								High-affinity gluconate Transporter (gntU) homolog (reference gene)								2-dehydro-3-deoxygluconokinase (kdgK) homolog (reference gene)				2-dehydro-3-deoxyphosphogluconate aldolase (eda) homolog (reference gene)
			f37_MKMCEHOJ_02531 gluconokinase				f17_EAOGLLOI_00767 gluconate dehydratase				f17_EAOGLLOI_00766 Low-affinity gluconate transporter				f37_MKMCEHOJ_02530 Low-affinity gluconate transporter				f17_EAOGLLOI_00912 High-affinity gluconate transporter				f37_MKMCEHOJ_02505 High-affinity gluconate transporter				f17_EAOGLLOI_00768 2-dehydro-3-deoxygluconokinase				f17_EAOGLLOI_00769 Putative KHG/KDPG aldolase
No.	Closest species	Group	gene id	% identity	evalue	q.cover %	gene id	% identity	evalue	q.cover %	gene id	% identity	evalue	q.cover %	gene id	% identity	evalue	q.cover %	gene id	% identity	evalue	q.cover %	gene id	% identity	evalue	q.cover %	gene id	% identity	evalue	q.cover %	gene id	% identity	evalue	q.cover %
f01	Bifidobacterium longum	F18-mix	CNLHCNON_00027	45.714	1.46e-27	58.6207
f02	Bacteroides xylanisolvens	F13-mix																									FGMDOMCP_03736	37.3494	1.77795e-71	92.7374	FGMDOMCP_03735	30.7692	2.07261e-23	97.6526
f03	Bacteroides fragilis	F13-mix																									KAJNBHKH_02508	37.3887	4.69811e-72	94.1341	KAJNBHKH_02507	30.7692	8.29679e-22	97.6526
f04	Bacteroides uniformis	F13-mix																									BCFCFPPK_03834	37.6506	1.76808e-64	92.7374	BCFCFPPK_03836	31.25	3.36393e-24	97.6526
f05	Bacteroides thetaiotaomicron	F13-mix																									JMHGMDPE_02455	37.3494	1.12718e-63	92.7374	JMHGMDPE_02456	30.7692	5.13702e-23	97.6526
f07	Bacteroides sp.	F13-mix																									ECEJAEAP_01886	37.3494	2.71197e-64	92.7374	ECEJAEAP_01885	30.7692	5.65121e-23	97.6526
f09	Parabacteroides goldsteinii	F13-mix																									JCIJEONN_04453	34.0058	3.67562e-63	96.9274	JCIJEONN_04452	30.0971	9.7352e-23	96.7136
f10	[Ruminococcus] gnavus	F13-mix					FONBLEPD_00269	71.897	0	100	FONBLEPD_00271	56.11	5.42e-139	88.6918													FONBLEPD_02849	34.2342	1.02692e-52	93.0168	FONBLEPD_02848	70.936	4.52902e-107	95.3052
f11	Ruminococcus sp. AM22-13	F13-mix
f12	Faecalimonas umbilicata	F18-mix																									EPPPOELC_00775	35.1351	1.35488e-53	93.0168	EPPPOELC_00774	67.8049	5.81188e-104	96.2441
f13	Enterocloster alcoholdehydrogenati	F13-mix					FHKCONON_03198	69.085	0	99.8273	FHKCONON_00253	51.75	1.93e-125	88.4701													FHKCONON_00259	38.5965	2.06339e-71	95.5307	FHKCONON_00258	29.7753	2.77488e-23	83.5681
f14	Coprococcus phoceensis	F13-mix
f16	Anaerostipes hadrus	F13-mix
f17	Blautia caecimuris	F18-mix					EAOGLLOI_00767	100	0	100	EAOGLLOI_00766	100	0	100					EAOGLLOI_00912	100	0	100					EAOGLLOI_00768	100	0	100	EAOGLLOI_00769	100	2.19203e-158	100
f18	Enterocloster bolteae	F18-mix					PGAODDDK_05264	69.775	0	99.8273	PGAODDDK_05263	84.081	0	98.6696													PGAODDDK_01520	37.4269	2.39983e-68	95.5307	PGAODDDK_01519	29.2308	2.63495e-25	91.5493
f19	Blautia caecimuris	F18-mix					DHAAOBAE_00692	99.349	0	79.4473	DHAAOBAE_00693	97.682	0	66.7406					DHAAOBAE_00574	95.699	0	100					DHAAOBAE_00690	98.6034	0	100	DHAAOBAE_00689	98.1221	2.90679e-156	100
f20	[Clostridium] innocuum	F18-mix																													ILFDFHND_04299	32.0652	2.06792e-29	86.385
f21	Blautia sp. NBRC 113351	F18-mix					EKJEFAGC_00541	72.586	0	100	EKJEFAGC_05068	57.718	8.42e-145	98.6696					EKJEFAGC_00543	29.121	8.46e-38	75					EKJEFAGC_04683	36.2805	1.80674e-55	91.6201	EKJEFAGC_04684	71.09	6.48254e-104	99.061
f22	Enterocloster asparagiformis	F18-mix					PKNBPMIK_04122	67.014	0	99.3092									PKNBPMIK_04125	30.11	1.06e-37	92.2414					PKNBPMIK_02071	37.5367	9.44076e-68	95.2514	PKNBPMIK_02070	29.4118	1.60499e-26	95.7746
f23	Mediterraneibacter glycyrrhizinilyticus	F18-mix					EBMMFAOD_00508	67.876	0	99.8273																	EBMMFAOD_00451	25.4658	2.78434e-17	100	EBMMFAOD_00450	70.283	7.01339e-111	99.5305
f24	Eisenbergiella tayi	F18-mix					DLFENNED_05018	71.007	0	99.3092																	DLFENNED_06047	35.942	2.24469e-72	96.3687	DLFENNED_06046	63.9024	5.34551e-92	96.2441
f26	Flavonifractor plautii	F18-mix																									HDKMGEIM_04535	37.4286	4.06452e-69	97.7654	HDKMGEIM_04534	55.6098	3.02751e-81	96.2441
f28	Intestinibacter bartlettii	F18-mix																									KMIFPLGP_02516	36.9822	2.54843e-69	94.4134	KMIFPLGP_02517	36.0248	2.78715e-27	75.5869
f29	[Ruminococcus] gnavus	F13-mix					ALOIBIFK_03476	71.897	0	100	ALOIBIFK_03478	55.611	1.87e-137	88.6918													ALOIBIFK_02015	34.2342	1.24308e-52	93.0168	ALOIBIFK_02014	71.4286	5.52205e-108	95.3052
f30	Massilimicrobiota timonensis	F18-mix					DFNANFDB_01672	73.183	0	99.6546																	DFNANFDB_01675	31.5152	2.60234e-49	92.1788	DFNANFDB_01674	28.2178	3.52712e-24	94.8357
f31	Anaerostipes hominis (ex Lee et al. 2021)	F18-mix																									DDMKBPFJ_01061	20.625	1.19151e-11	89.3855	DDMKBPFJ_01301	27.0936	3.33187e-25	95.3052
f32	Blautia coccoides	F18-mix					GFFMIMOM_00656	72.586	0	100									GFFMIMOM_00658	30.028	5.62e-37	75					GFFMIMOM_02401	36.3363	2.34e-56	93.0168	GFFMIMOM_02400	71.09	3.62134e-103	99.061
f33	Thomasclavelia ramosa	F18-mix					IDFBFOFA_01313	66.955	0	99.6546																	IDFBFOFA_01311	25.5255	6.92137e-20	93.0168	IDFBFOFA_01312	55.3846	4.89e-80	91.5493
f34	Veillonella parvula	F13-mix
f35	Fusobacterium ulcerans	F18-mix																	EMDMBBGG_02505	56.263	2e-143	99.569					EMDMBBGG_00938	29.3051	1.84296e-42	92.4581	EMDMBBGG_00939	34.0782	2.76228e-32	84.0376
f37	Escherichia coli	F18-mix	MKMCEHOJ_02531	100	4.8e-122	100									MKMCEHOJ_02530	100	0	100					MKMCEHOJ_02505	100	0	100					MKMCEHOJ_00849	43.7158	2.5296e-54	85.9155
i01	Bifidobacterium adolescentis	I42-mix	CAKGJPAO_00191	36.691	1.52e-30	79.3103																	CAKGJPAO_00190	38.81	6.63e-86	98.0998
i02	Bifidobacterium pseudocatenulatum	I42-mix	JFDANPEK_00221	36.879	5.56e-31	80.4598																	JFDANPEK_00220	37.47	1.42e-83	98.0998
i03	Bifidobacterium bifidum	I42-mix
i04	Bifidobacterium longum	I42-mix	ALIAHKGE_00021	45.714	1.46e-27	58.6207
i05	Collinsella sp.	I42-mix
i06	uncultured Collinsella sp.	I42-mix
i07	Bifidobacterium longum	I42-mix	HBOOHHLN_00021	45.714	1.46e-27	58.6207
i08	Bacteroides stercoris	I42-mix
i09	Phocaeicola massiliensis	I42-mix
i10	Phocaeicola vulgatus	I42-mix																									KIJBOIOO_02958	36.3636	4.19763e-70	98.324	KIJBOIOO_02959	31.401	1.37609e-23	97.1831
i11	Phocaeicola dorei	I42-mix																									IAIHHOAL_01240	36.3636	4.74925e-70	98.324	IAIHHOAL_01241	31.401	1.24905e-23	97.1831
i12	Parabacteroides merdae	I42-mix																									GLJIHEHM_02788	33.8323	4.23449e-61	93.2961	GLJIHEHM_02789	30.6533	1.18823e-24	93.4272
i13	Parabacteroides distasonis	I42-mix					AFPGDEAI_01673	61.806	0	99.3092													AFPGDEAI_02973	46.793	1.79e-114	99.2874	AFPGDEAI_00667	34.139	5.77964e-61	92.4581	AFPGDEAI_00666	28.8462	2.41338e-23	97.6526
i15	Alistipes putredinis	I42-mix
i16	Bacteroides uniformis	I42-mix																									HIHCMBHB_03231	37.3494	1.42398e-63	92.7374	HIHCMBHB_03229	31.25	2.54933e-24	97.6526
i17	Bacteroides ovatus	I42-mix																									PPBFCAGN_02408	37.0482	5.09864e-63	92.7374	PPBFCAGN_02409	30.7692	2.33539e-23	97.6526
i18	uncultured Alistipes sp.	I42-mix																									APCGAFOE_02687	36.5497	1.31186e-65	95.5307	APCGAFOE_02688	31.068	1.38078e-24	96.7136
i19	Odoribacter splanchnicus	I42-mix
i20	Faecalibacterium sp. I4-3-84	I42-mix					GFDADFBJ_02480	64.094	0	100	GFDADFBJ_02479	82.033	0	93.5698													GFDADFBJ_01585	77.6536	0	100	GFDADFBJ_00102	48.7805	2.86562e-70	96.2441
i21	Faecalibacterium sp. I4-3-84	I42-mix					BEAJJIIG_02823	64.094	0	100	BEAJJIIG_02822	82.033	0	93.5698													BEAJJIIG_01927	77.6536	0	100	BEAJJIIG_00442	48.7805	2.8661e-70	96.2441
i22	Blautia wexlerae	I42-mix					MMKBGNBN_03241	89.31	0	100	MMKBGNBN_03243	55.31	1.3e-136	99.5565													MMKBGNBN_03988	75.4335	0	96.648	MMKBGNBN_03987	78.673	1.70552e-123	99.061
i23	Firmicutes bacterium AM31-12AC	I42-mix					IEINNFOL_02285	88.793	0	100	IEINNFOL_02286	55.556	1.05e-137	92.6829													IEINNFOL_02284	69.2529	0	97.2067	IEINNFOL_02283	79.6117	4.98586e-119	96.7136
i24	Ruminococcus bicirculans (ex Wegman et al. 2014)	I42-mix
i25	Faecalibacterium sp. I4-3-84	I42-mix					HOMMCNHA_02663	63.591	0	100	HOMMCNHA_02662	82.033	0	93.5698													HOMMCNHA_01658	77.3743	0	100	HOMMCNHA_02463	28.2353	4.66947e-24	79.8122
i26	Dorea longicatena	I42-mix									CBJLMLAF_00843	55.83	4.77e-133	98.6696													CBJLMLAF_02569	23.1707	1.27203e-17	91.6201	CBJLMLAF_02570	61.5	6.63245e-89	93.8967
i27	Dorea formicigenerans	I42-mix																									BHGLLHGK_00355	33.4337	7.36859e-52	92.7374	BHGLLHGK_00354	70.6161	7.59475e-110	99.061
i28	Anaerostipes hadrus	I42-mix
i29	Intestinibacter bartlettii	I42-mix																									LJFCGNOK_00139	36.9822	2.26452e-69	94.4134	LJFCGNOK_00138	36.0248	2.47665e-27	75.5869
i30	Flavonifractor plautii	I42-mix																	JLBOFAMM_02808	31.117	1.24e-37	79.7414					JLBOFAMM_03215	34.0491	3.56202e-56	91.0615	JLBOFAMM_03216	55.6098	2.37365e-81	96.2441
i31	Lawsonibacter asaccharolyticus	I42-mix
i32	Faecalibacillus intestinalis	I42-mix
i33	Megasphaera elsdenii	I42-mix																					ABMIDDIK_01306	59.953	1.82e-149	100
i34	Dialister sp. CAG:486	I42-mix
i35	Acidaminococcus intestini	I42-mix
i37	Megasphaera massiliensis	I42-mix																					IIDCKEOG_02049	59.479	3.29e-147	100	IIDCKEOG_00498	26.0736	1.33287e-19	91.0615	IIDCKEOG_00499	42.5743	1.28e-56	94.8357
i38	Sutterella wadsworthensis	I42-mix
i39	Clostridium baratii	I42-mix																									ANBKAAHJ_01415	38.8406	1.76849e-81	96.3687	ANBKAAHJ_01420	34.1969	7.16309e-30	90.6103
i40	Clostridia bacterium UC5.1-1E11	I42-mix
i41	Clostridiales bacterium	I42-mix																									FHGOMEMB_00208	32.9446	1.12399e-63	95.8101	FHGOMEMB_00595	51	8.14847e-67	93.8967
i42	Pseudoflavonifractor gallinarum	I42-mix
i43	Solibaculum mannosilyticum	I42-mix
k01	Sellimonas intestinalis	K46-mix																									JLCCNCGE_02145	23.5795	1.94561e-18	98.324	JLCCNCGE_02142	58.5366	2.9188e-89	96.2441
k02	Bacteroides ovatus	K46-mix																									EGGCFMCN_04247	37.0482	5.29459e-63	92.7374	EGGCFMCN_04246	30.7692	2.42514e-23	97.6526
k03	Blautia coccoides	K46-mix					EAPGLPFA_04135	72.586	0	100									EAPGLPFA_04133	28.571	4.53e-35	75					EAPGLPFA_05571	36.3363	2.49638e-56	93.0168	EAPGLPFA_05570	71.09	3.86553e-103	99.061
k04	Blautia hominis	K46-mix					BNLHKKFH_05311	72.931	0	100	BNLHKKFH_03808	57.271	5.75e-145	98.6696					BNLHKKFH_05313	29.67	1.17e-38	75					BNLHKKFH_03256	36.2805	5.17876e-56	91.6201	BNLHKKFH_03257	71.09	1.25614e-103	99.061
k05	Bilophila wadsworthia	K46-mix																	GIKLEFGL_00727	34.12	3.4e-55	99.7845
k06	Alistipes onderdonkii	K46-mix
k07	Eisenbergiella porci	K46-mix					NGPHAEGG_00086	70.517	0	100																	NGPHAEGG_04498	36.1446	6.56575e-70	92.7374	NGPHAEGG_04499	62.6214	1.8816e-90	96.7136
k08	[Clostridium] innocuum	K46-mix																													BGMMIBLA_04391	30.8108	5.95303e-30	86.8545
k09	Bacteroides fragilis	K46-mix																									MBBKBEJO_01361	37.3887	1.42728e-71	94.1341	MBBKBEJO_01362	31.7308	1.42715e-23	97.6526
k10	Eggerthella lenta	K46-mix
k11	Dielma fastidiosa	K46-mix																													DDEMCEIC_02910	38.6243	1.46249e-48	88.7324
k12	Thomasclavelia ramosa	K46-mix					LLKJONED_01597	66.955	0	99.6546																	LLKJONED_01595	25.5255	6.9259e-20	93.0168	LLKJONED_01596	55.3846	4.89644e-80	91.5493
k13	Enterococcus faecalis	K46-mix																									DJAPLJBJ_00346	36.1272	6.5023e-71	96.648	DJAPLJBJ_02588	38.0952	1.88737e-46	88.7324
k14	Bacteroides intestinalis	K46-mix																									LMIONDID_02755	37.2159	1.23393e-64	98.324	LMIONDID_02754	31.401	5.20789e-25	97.1831
k15	[Clostridium] symbiosum	K46-mix																													EFEKECFI_02753	56.5217	2.18218e-82	97.1831
k16	[Clostridium] hylemonae	K46-mix																													NCELMCLE_01437	54.2289	5.54008e-81	94.3662
k17	Hungatella effluvii	K46-mix					FCCFCLNI_05334	69.828	0	100	FCCFCLNI_05332	46.782	5.18e-105	88.0266					FCCFCLNI_01939	33.489	5.24e-43	90.5172					FCCFCLNI_02883	39.0029	3.22672e-72	95.2514	FCCFCLNI_02884	30.3922	7.65718e-27	95.7746
k18	Phocaeicola dorei	K46-mix																									FCKDLCKD_02674	36.3636	3.92097e-70	98.324	FCKDLCKD_02673	31.401	1.2651e-23	97.1831
k19	Enterocloster clostridioformis	K46-mix					HGDCKBFN_00437	69.603	0	99.8273	HGDCKBFN_00438	83.632	0	98.6696													HGDCKBFN_02238	37.4269	2.39203e-68	95.5307	HGDCKBFN_02237	28.7179	6.71352e-25	91.5493
k20	Flavonifractor plautii	K46-mix																									GOHFBNDO_04628	37.4286	4.18832e-69	97.7654	GOHFBNDO_04627	49.7561	7.54431e-72	96.2441
k21	Bacteroides xylanisolvens	K46-mix																									KKOAPGAG_01255	37.6506	2.94751e-64	92.7374	KKOAPGAG_01253	30.7692	2.54451e-23	97.6526
k22	Bacteroides thetaiotaomicron	K46-mix																									PJBLNMBE_01851	37.3494	1.09169e-63	92.7374	PJBLNMBE_01852	30.7692	1.01518e-22	97.6526
k23	Parabacteroides merdae	K46-mix																									OKLBHBHO_00530	33.8323	4.59036e-61	93.2961	OKLBHBHO_00531	30.6533	1.29e-24	93.4272
k24	Phocaeicola vulgatus	K46-mix																									GCJGANJK_02378	36.3636	4.3646e-70	98.324	GCJGANJK_02377	31.401	1.43083e-23	97.1831
k25	Enterocloster aldenensis	K46-mix					DPGHCJGG_05294	68.912	0	99.8273									DPGHCJGG_02370	37.637	3.32e-71	97.4138					DPGHCJGG_02494	37.4269	2.43423e-66	95.5307	DPGHCJGG_02493	29.902	6.64014e-28	95.7746
k26	Bacteroides uniformis	K46-mix																									LEBEFCNP_02129	37.3494	2.08235e-63	92.7374	LEBEFCNP_02131	31.25	2.61756e-24	97.6526
k27	Gordonibacter urolithinfaciens	K46-mix
k28	Candidatus Bariatricus faecipullorum	K46-mix																									MBJFNHOF_01477	26.7477	7.97929e-17	91.8994	MBJFNHOF_01474	57.767	3.985e-88	96.7136
k29	Anaerostipes caccae	K46-mix																									FPFPMJAO_01288	35.7558	3.09398e-68	96.0894	FPFPMJAO_01289	55.6701	1.12088e-69	91.0798
k30	[Ruminococcus] gnavus	K46-mix					GGDNGPNC_02218	71.897	0	100	GGDNGPNC_02220	56.11	5.42e-139	88.6918													GGDNGPNC_01005	34.2342	9.40166e-53	93.0168	GGDNGPNC_01004	70.936	4.14643e-107	95.3052
k31	[Ruminococcus] gnavus	K46-mix					JDEDMANH_02262	71.897	0	100	JDEDMANH_02264	56.11	6.66e-139	88.6918													JDEDMANH_00921	34.2342	1.34256e-52	93.0168	JDEDMANH_00920	71.4286	5.83686e-108	95.3052
k32	Alistipes shahii	K46-mix																									LBFMNOPD_02673	36.5497	8.53081e-70	95.5307	LBFMNOPD_02674	29.6117	6.57081e-23	96.7136
k33	Bacteroides stercoris	K46-mix																									FLMBAABK_03018	37.6506	3.31888e-64	92.7374	FLMBAABK_03016	32.2115	1.66152e-26	97.6526
k34	Blautia sp. NBRC 113351	K46-mix					HOEMBMAP_06207	72.586	0	100	HOEMBMAP_05033	57.494	2.58e-144	98.6696					HOEMBMAP_06209	29.121	8.46e-38	75					HOEMBMAP_02183	36.2805	2.02972e-55	91.6201	HOEMBMAP_02182	71.09	7.36056e-104	99.061
k35	Agathobaculum butyriciproducens	K46-mix
k36	Enterocloster bolteae	K46-mix					FDCNGLDG_04719	69.603	0	99.8273	FDCNGLDG_04718	84.081	0	98.6696					FDCNGLDG_02453	36.386	1.67e-71	95.7245					FDCNGLDG_01665	37.4269	2.80941e-68	95.5307	FDCNGLDG_01664	29.2308	7.83595e-26	91.5493
k37	Merdimmobilis hominis	K46-mix
k38	Holdemania massiliensis	K46-mix																									MEJKAFPA_00236	37.0056	1.14234e-69	98.8827	MEJKAFPA_00235	54.1463	1.53173e-82	96.2441
k39	Escherichia coli	K46-mix	IHLFMFDM_00307	100	4.8e-122	100									IHLFMFDM_00308	99.776	0	105.701					IHLFMFDM_00337	100	0	90.7328					IHLFMFDM_02219	43.7158	2.61138e-54	85.9155
k40	Agathobaculum massiliense	K46-mix					AFILLPBB_01494	69.204	0	99.6546									AFILLPBB_00534	34.537	9.67e-62	89.2241					AFILLPBB_03287	35.2071	1.66e-59	94.4134	AFILLPBB_03285	52.1127	4.81623e-77	100
k41	Agathobacter rectalis	K46-mix
k42	Lactonifactor longoviformis	K46-mix					MFPDOCHA_03257	72.069	0	100									MFPDOCHA_03253	30.909	2.04e-41	92.2414					MFPDOCHA_00620	36.5497	1.20041e-61	95.5307	MFPDOCHA_00619	33.1658	4.13299e-25	93.4272
k43	Dysosmobacter welbionis	K46-mix
k44	Lawsonibacter asaccharolyticus	K46-mix
k46	Streptococcus pasteurianus	K46-mix
k47	Sutterella wadsworthensis	K46-mix
Kp2H7	Klebsiella pneumoniae	Kp2H7	NOCLEBFK_02257	94.253	6.74e-115	99.4253									7_NOCLEBFK_02256	95.724	0	99.7625													NOCLEBFK_00665	43.478	1.2e-52	64.13
