# Supplementary material for: Rationally-defined microbial consortia suppress multidrug-resistant proinflammatory Enterobacteriaceae via ecological control
Source: Research Square preprint supplement (doi:10.21203/rs.3.rs-3462622/v1), 2023-10-23
Supplement: Supplementary file 2 [file 1ca56e4b76d92c6760b91b8b.xlsx]

## Sheet: cds.both.TPM
Sample ID Geneid	Input_001	F18_d0_001	F18_d0_002	F18_d0_003	F18_d0_004	F18_d4_001	F18_d4_002	F18_d4_003	F18_d4_004	F18_d10_001	F18_d10_002	F18_d10_003	F18_d10_004	F18_d28_001	F18_d28_002	F18_d28_003	F18_d28_004	F13_d0_005	F13_d0_006	F13_d0_007	F13_d0_008	F13_d4_005	F13_d4_006	F13_d4_007	F13_d4_008	F13_d10_005	F13_d10_006	F13_d10_007	F13_d10_008	F13_d28_005	F13_d28_006	F13_d28_007	F13_d28_008	Kp_d0_009	Kp_d0_010	Kp_d0_011	Kp_d0_012	Kp_d4_009	Kp_d4_010	Kp_d4_011	Kp_d4_012	Kp_d10_009	Kp_d10_010	Kp_d10_011	Kp_d10_012	Kp_d28_009	Kp_d28_010	Kp_d28_011	Kp_d28_012
NOCLEBFK_00001	176.6	62.0535	0.538409	22.7949	35.4366	86.5115	162.03	0.261372	30.7756	0.105603	0	0.141081	0.932363	0.131677	0.128794	0.101897	0	122.402	28.8161	131.497	2.31421	27.9862	5.1438	38.0888	5.76981	7.67742	0.230603	0	1.18403	0.13204	0	0.349618	0.19599	50.3749	0	2.61382	0.144811	43.9711	0.254961	0	0	2.76024	0	0	84.0042	0	0.128521	0	0
NOCLEBFK_00002	75.2177	142.422	134.758	47.2942	0.679475	110.339	63.8766	252.457	0.173617	0.288343	0	0	0	0	0	0	0.161761	0	37.9836	0	76.8788	3.78022	55.9284	36.6516	128.605	110.928	62.3349	3.17774	0	0	0	0	0	91.6513	45.6355	242.832	0	3.84192	0.174039	0	0	0	17.2214	0	0	0	0	0.125942	0
NOCLEBFK_00003	68.0772	0	0	0	0	0	0	0	0	54.7689	0	0	0	0	0	0	0	0	0	0	0	0	23.7649	14.997	0	0	0	0	0	0	0	0	0	0	0	0	0	26.0625	0	0	0	0	0.395599	0	0	0	0	0	0
NOCLEBFK_00004	140.727	81.2756	19.6527	0	29.2859	0.384948	0.198487	0	0	0	0	0	1.23009	0.173725	0.169922	0	0	0.181448	0.218493	0	0	0	0	0.221373	0	0.337635	0	0.170607	0	0	0	0	0.258575	0	0.370601	0	0	0	0	0	0	0.49659	0	0	0.306581	0	0.339122	0	0
NOCLEBFK_00005	71.9573	5.15649	138.751	69.7899	13.9468	17.0642	48.9338	73.8146	15.591	108.66	0.488146	0	0.816468	0.247092	0.402802	0.063736	0.074114	17.4631	49.2045	42.0372	142.502	68.4749	117.092	31.1712	33.0702	56.1859	52.1433	260.289	5.85753	18.2525	0.085707	1.64014	0.245183	33.0786	45.3314	1.96192	0	61.0951	27.1909	27.812	13.3389	24.0929	0	0.162592	2.9797	5.07849	0	0.057702	0
NOCLEBFK_00006	177.382	7.29685	5.67903	50.5573	13.205	63.9193	6.59161	471.111	211.887	347.146	7.12353	3.94918	9.98569	14.904	6.11322	25712.7	5.47983	3.6824	41.9236	14.8146	123.927	56.3266	54.3303	4.90109	71.2248	33.7936	38.1692	7.39694	15.5893	14.6237	48.0276	8.51009	13.5962	7.4499	9.45846	10.0206	7.4022	135.857	7.75754	11.2035	18.4143	6.56603	53.0171	6.95997	2.96956	5.0951	2.8155	5.9505	9.37805
NOCLEBFK_00007	132.959	0	0	0	0	0	0	77.862	5.52904	0	0	0	0	0	0	0	0.190796	0	0	0	27.1205	87.1044	0	0	0	0	32.4913	0	0.173326	0	0	0	0.315594	0	8.14182	0	0	0.377625	0	0	0	0	0	0	0	0	0	0	0
NOCLEBFK_00008	14.3208	0	0	42.913	18.2961	62.365	21.7869	0	23.906	0.294097	0	0.098225	0	0.091678	0	0	0	0.67027	29.0562	0	0	0	0	0.58411	0	52.3835	0	0	0	0	0	0	0	2.79463	0.391144	47.0423	55.3512	0	0	0	0	0	0	0	0	0	0	0	0
NOCLEBFK_00009	76.9337	80.935	88.7649	11.5682	61.6084	2.64791	52.4281	123.58	192.966	161.389	123.233	0	176.673	0	0	0	0	70.0188	23.1451	79.8165	199.284	105.54	53.1826	19.7956	0.961748	42.7332	0	41.5433	0.097684	0.838797	2.61133	0	0	20.3992	4.84352	75.432	0.394254	16.281	0.347071	0.157623	15.5688	8.08418	1.2211	0.4718	0.210885	16.0028	0	0	0.148785
NOCLEBFK_00010	126.684	0	0	3.43828	31.1566	0	0	4.29894	36.2557	207.378	0	0	0	0	0	0	0	0	0	0	23.1968	0	0	0	27.1142	0	0	0.128903	0.107297	0.131621	0	0	0	0	0	0	0	0	0.127076	0.173135	0	0	0	0.129558	0	0	0	0.183915	0
NOCLEBFK_00011	158.774	238.31	53.6359	20.6763	20.8637	0.930128	3.95664	0	42.7698	0	0	0.112435	531.579	0.209882	0	0	0	0	12.6704	0.273266	0.307387	57.4538	2.63531	30.4888	33.5017	0	1.01079	27.8254	0	0.10523	0	0	0	0.319893	0.149244	3.54126	0.115408	0	0.711173	0	0.189891	0.09999	0	0	6.66697	0.101103	0.102425	0	0
NOCLEBFK_00012	26.362	4.14856	2.05545	13.0247	20.7106	13.6452	8.32801	6.73529	2.54885	5.44258	4.8414	8.34823	28.4753	39.0845	4.17935	2.33403	4.74959	5.2504	16.7543	6.05421	5.76717	2.1708	12.6239	6.24554	3.82101	15.0211	10.8944	10.9842	11.1977	8.44333	6.14639	2.00207	11.4103	25.5715	7.8641	15.9657	4.42268	6.49079	5.11007	0.994607	13.6444	18.0815	3.21048	9.79953	3.6594	23.3679	17.4179	1.32067	9.07541
NOCLEBFK_00013	134.29	287.048	268.191	171.884	138.537	143.927	229.184	226.169	18.8458	222.704	0.404372	0.292406	1730.49	0.409373	0.13347	0.105596	0.122789	93.7802	183.635	42.9956	138.831	63.6409	185.998	168.841	188.53	56.7538	39.4308	0.402024	77.1902	0	0.283992	0.362311	0	40.4527	0.291099	121.756	0.150068	75.5811	6.60543	0.179992	30.4947	10.5316	7.66913	0.134689	0.240813	0.262934	0	0.095599	0.679597
NOCLEBFK_00014	0	0	0	0.272193	0.18067	0	0	0	0	0	0	0	0	0	0	0	0	0	0	0	0	0	0	0	0	0	0	0	0	0.239656	0	0	0	0	0	0	0	0	0	0	0	0	0	0	0	0	0	0	0
NOCLEBFK_00015	11.3951	0	0	0	0	0	0	0	54.679	100.353	0	0	0	0	0	0	0	0	0	0	3.19476	0.372324	0.138331	5.81196	0.354665	0	4.51472	0	0	0	0	0	0	2.72024	0	39.5608	0	0	0	0	0	0	0	0	0	0	0	0	0.123452
NOCLEBFK_00016	230.945	329.878	140.672	104.588	105.659	205.83	120.622	170.004	151.741	36.3507	95.9009	41.6348	64.3636	2.23832	0.060814	79.4838	0.335685	147.477	65.1386	522.548	712.336	496.362	59.9393	119.793	498.563	243.005	496.901	132.682	13.5194	0.311733	2.00567	1.56829	115.401	108.411	105.048	268.807	3.21372	147.384	71.5103	136.877	78.5297	101.127	67.7429	25.7752	91.7839	294.895	504.17	50.5282	883.822
NOCLEBFK_00017	373.262	219.25	280.66	137.335	121.721	309.857	229.351	266.175	287.765	0.407364	48.1669	1.19728	0.143863	0.101589	0.099364	0	0.274239	65.2542	109.88	182.663	150.074	125.581	126.281	41.295	43.6055	26.2592	19.748	81.2089	142.917	0.203737	6.97699	0.404595	0.907236	275.92	142.743	352.393	0.111721	285.773	11.9988	1.60799	155.884	36.4923	0.12976	0	35.2282	1.07661	0.198307	1.77927	5.05941
NOCLEBFK_00018	300.166	89.9707	285.897	98.9487	144.356	151.643	400.419	298.745	246.563	13.7211	0.264062	55.3743	22.7143	0	0.348632	0.068956	0.160367	171.993	235.127	134.003	471.826	31.1188	75.4616	49.1667	83.1115	94.2983	43.071	2581.18	30.375	33.2399	57.3045	0.236595	0.265262	33.0713	101.89	284.517	0.293991	95.6962	36.0605	92.2673	0.48373	0.509433	9.44705	0.527725	113.774	0.08585	28.0053	23.2857	0
NOCLEBFK_00019	202.68	0	0	0	0	0	49.7594	0	0	0	0	0	0	0	0	0	0	0	0	0	0	0	81.5267	58.6579	0	0	0	0	0.675972	0	0.286832	0	0	0	0	0	0	0	0	0	0	0	0	0	0	0	0	0	0
NOCLEBFK_00020	161.802	7.73043	0.272239	146.955	23.4041	81.4379	19.8544	57.4892	0.96454	0.320381	0.295953	147.879	274.093	1.3982	0	0.309136	0.539205	28.7897	50.9965	0.520129	0	207.762	69.388	1.78168	49.1199	89.4797	43.2007	28.0504	1.30623	1.20175	6.65117	0.26517	0	0.456658	1.27831	12.2913	0	5.51387	0.580129	0.526933	0.180717	0.19032	0	4.92883	0.352494	0	0.389908	6.71689	0
NOCLEBFK_00021	40.0074	127.292	0	0	0	0	37.7663	0	0.216433	251.526	0	0	0.158679	0	0	0	0	0	0	0	0.109404	0.084151	12.8187	0	0.3006	0	0	0	0	0	0	0	0	0	25.7358	29.0261	0.123227	0.099779	0	0	0.101378	0	0	0	0	0	0	0	0
NOCLEBFK_00022	0	0	0	0	0	0	0	0	0	0	0	0	0	0	0	0	0	0	0	0	0	0	0	0	0	0	0	0	0	0	0	0.527789	0	0	0	0	0	0	0	0	0	0	0	0	0	0	0	0	0
NOCLEBFK_00023	0	0	0	0	0	0	0	0	0	0	0	0	0	0	0	0	0	0	50.9751	0	0	0	0	0	0	0	0	0	0	0	0	0	0	0	0	205.995	0	0	0	0	0	0	0.6949	0	0	0	0	0	0.338681
NOCLEBFK_00024	0	0	0.496507	0.207442	3.85535	0	3.954	0.361545	4.74962	0	0	0.195152	0	0	0	0	0.491698	7.03888	0.458162	0	0	7.11319	1.01646	0	0.16288	0	0.159492	1.60987	0.744463	0.547936	1.13722	0	0.54221	18.7391	2.20184	3.25403	0.400622	0	0.529016	7.92838	0.32959	0.694205	0.232654	21.7537	0.642875	0	5.15555	0	0.226782
NOCLEBFK_00025	87.2264	0	0	37.1347	6.75601	0	67.5497	0.389885	0.379401	66.0825	0.145516	0.841795	0	0	0	0	0.088373	0.410304	0	0	64.7265	0	20.9635	1.62691	62.355	0.190872	0	0.578686	0	0	0	0.260761	0	0	29.0518	81.0016	0.108006	8.48311	0	0	0	2.62017	0	0.096938	0	0	0.095856	0	0
NOCLEBFK_00026	0	0	0	0	0	0	0	0	0	0	0	0	0	0	0	0	0	0	0	0	0	0	0	0	0	0	0	0	0	0	0	0	0	0	0	0	0	0	0	0	0	0	0	0	0	0	0	0	0
NOCLEBFK_00027	0.631966	0	0	32.253	0.428162	0	0	154.866	0	0	0	9.70947	0	0	0	0	0	2.66206	0	0	12.1664	0	0	0	0.253246	0	0	0	0.231497	0	0	0	0	0	0	0	0	0	0	0	0	0	0	0	5.99723	0	0	0	0
NOCLEBFK_00028	182.443	0.133328	0	0	5.04698	0	0	0.116247	0.113122	0.093936	0.347095	0	0	0	0.229129	0	0.105397	0	0	0.457507	4.46016	54.6266	0	0	0	0	0.102563	0.115027	0	0	0	0	0.174337	55.3423	0	157.289	0.128812	352.539	0	0.154497	0	0	84.9786	0.231222	0.103352	0	0	0.082058	0.291669
NOCLEBFK_00029	85.8745	0.652167	0.260293	30.8854	13.7872	19.4661	39.0575	1.04247	3.87331	0.765806	1.98077	4.70618	47.3287	0.763911	2.52175	3.25129	0.343696	8.6768	16.5732	2.11355	0.466168	1.57769	1.19897	17.2783	23.4822	1.39187	0.418067	10.409	10.7718	1.24477	1.98729	13.057	1.13701	8.44132	9.6419	3.69617	4.41055	1.87068	1.29424	3.14882	5.35641	7.00578	1.21969	0.754008	2.94898	3.03588	3.44839	0.668975	0.237781
NOCLEBFK_00030	185.565	87.8191	147.338	134.428	60.0671	28.6625	0.79173	244.837	194.529	0	16.4279	0	0	0	0.903717	0.178746	0	5.06634	157.747	96.8399	98.7829	48.9196	310.011	113.026	106.79	13.2432	72.4092	271.075	121.599	0	1.44217	0	0.343804	155.435	553.692	9.62877	0.254026	275.418	174.651	135.887	259.561	25.0903	369.097	0	1.01908	0.222539	0	0	0
NOCLEBFK_00031	0	0	0	0	0	4.27232	0	0	0	0	0	0	0	0	0	0	0	0	0	0	0	0	0	0	0	0	0	0	0	0	0	0	0	0	0	0	0	0	0	0	0	0	0	0	0	0	0	0	0
NOCLEBFK_00032	140.035	305.6	37.006	115.093	67.1107	220.182	40.0316	182.032	215.219	1.26494	6.00938	16.6576	202.62	9.35088	3.967	1.56927	7.70461	38.0071	41.3744	53.54	89.1004	28.0905	18.3897	31.8704	50.3731	13.5753	3.84736	7.966	3.31539	5.08372	33.7633	3.73911	1.67686	3.86355	13.0582	86.2111	0.371695	59.0901	7.74401	60.9276	20.0803	3.22039	2.44635	3.78083	6.06395	1.84519	4.1785	4.41997	77.5699
NOCLEBFK_00033	319.607	391.949	218.023	112.243	41.8111	123.759	39.1859	85.0307	106.049	65.3404	0.20086	0	58.1685	0.135563	0	0	0	0	13.6397	0	0	90.1012	23.2627	0.172743	5.69761	1.05386	29.0824	26.4928	67.5972	0	0	0	0.201773	0.10331	102.47	72.7901	0.149084	0	0.131242	0	0	0	34.1116	0.133806	5.02391	0.130605	0	0	0
NOCLEBFK_00034	173.309	101	295.067	42.2774	60.2303	132.076	195.511	101.84	288.657	106.013	184.085	0.107785	0	0	0.098397	0.155696	0.181047	0.525359	46.4343	85.2689	122.682	49.8643	41.263	15.2548	3.95827	0.097758	5.6377	0.395177	1.23353	0.100877	0.104683	0.267105	0.149734	136.004	12.8764	316.214	19.1397	75.3389	0.097394	0.26539	8.55571	33.2615	1.28497	0.297888	10.5632	0.096921	0	0.070478	0.250509
NOCLEBFK_00035	132.376	0	38.1648	27.3224	56.7387	51.7913	14.1015	67.2949	38.591	0.061865	0.114295	0	0	0	0.1509	0	0	27.8766	21.8289	105.859	82.7739	31.805	0.215239	12.8768	36.629	0.749599	0.202638	0	0	0	1.20405	0.102407	0	40.7976	19.0887	29.6293	0.169667	0	0	33.0685	12.3532	10.29	0	0.152279	24.3675	0	0.37645	0.108084	0.192088
NOCLEBFK_00036	113.888	0	1.22841	22.4541	19.4178	42.189	82.2515	200.145	71.1594	1.62635	0	0	47.5439	0	0	0	0	39.5368	15.5863	0.146685	1.98001	21.4909	42.595	34.4545	9.97387	56.8192	29.4964	96.4771	0	0.112971	0	0	0	79.8467	0	103.207	0.123898	49.3588	8.94378	61.8192	0	23.9383	0	0.222402	0.099409	0.108541	0.10996	0.078928	0
NOCLEBFK_00037	103.412	68.4818	37.9911	2.91002	0	43.75	40.8705	11.0657	150.306	0	286.35	0	0	0	0	0	0	0	4.67428	0	0.226799	0.523345	0	1.18397	0	0	0.203397	0	0	0	0	0	0	0	0	0	0	0	0.224881	0	0	0	0	0.229274	0	1.56652	0	0	0
NOCLEBFK_00038	91.9585	23.1388	88.2055	26.1433	6.37661	5.51544	8.84761	25.527	0	0.110901	3.07336	0	0.587483	0.138283	0	0	0.995455	6.06605	1.39134	0	0.135017	1.24623	1.15754	4.05283	0.494634	3.35941	0.968685	1.22221	0.339116	1.5253	1.58285	6.42526	0.205822	3.47763	35.2025	4.52916	1.36868	0.369416	1.07101	2.9184	1.62646	2.10816	0.529891	1.22842	0.122017	7.19418	4.45395	0.58127	2.06607
NOCLEBFK_00039	93.2577	10.9721	0	0	0.095877	156.256	27.2426	0	131.677	0.50858	0	0	0	0	0	0	0	0	0	0.165133	3.71505	0	0.176945	0	146.534	0	4.99757	0	0	10.6831	0.527911	0	0	0	56.367	1.13292	0	0	0.245576	0	1.95075	18.2479	32.7243	0	22.9418	0.122192	0	0	0
NOCLEBFK_00040	55.0307	63.3132	16.7719	5.15741	17.7116	0.218137	0.224952	61.2599	34.988	55.3446	0	0	0.418232	0	0	0	0	0	20.8006	0	0	6.5061	5.08169	22.4546	66.3769	0	0	0	0	0	0	0	0.146526	0.075022	36.2612	0	0	33.5749	0	0	21.5544	1.59461	6.28719	0.097168	0.086865	0	0	0	0.12257
NOCLEBFK_00041	78.2265	5.00205	148.915	29.6868	6.26627	23.4576	44.2731	167.512	64.4313	0.240286	0	0	0	0	0.097684	0	0.089867	49.0259	52.5038	40.7001	56.4597	51.003	74.5433	26.5979	49.4771	1.35869	22.6497	62.8683	0.081639	0	0	0.132585	0.148649	173.454	52.6946	168.311	0	5.78067	0.096688	0	125.237	55.2878	19.7728	0.098577	0.176247	58.597	35.0917	0.069968	95.0008
NOCLEBFK_00042	30.5682	125.123	79.9486	81.7365	37.7357	0.186215	7.87332	4.00345	24.8357	0.134794	0.249034	0.180079	33.7986	0	0	0	0	37.2159	58.1317	0.43767	42.1753	9.08834	46.8976	38.9796	60.7213	1.63327	0	0	0	0	0	0	0	0	0	208.187	0	29.0357	0	0	0	39.7165	0	0	0	0	0	0	0
NOCLEBFK_00043	39.3926	4.08324	2.83054	31.393	12.9876	6.69352	35.8074	9.55618	49.4135	5.60228	2.79737	12.5414	14.1702	47.9546	2.76995	2.77587	12.7415	20.1133	4.98644	83.5769	136.964	14.6043	3.16077	10.826	6.92205	21.2818	13.8867	3.33735	2.77797	28.9656	19.8425	3.7596	17.9845	21.8695	0.537005	19.6752	15.5721	10.7597	15.9019	4.48254	2.22059	17.8092	54.2593	5.77686	16.659	4.91109	6.26523	5.42297	12.4585
NOCLEBFK_00044	219.654	20.5643	163.476	11.03	71.1	0.206346	157.254	4.80594	0	154.146	73.6804	0	0	0	0	0	0.167591	54.2724	22.9556	0.484985	71.2843	43.9202	1.03935	3.79724	29.3126	15.9266	0	54.8709	0	0	0	0	0	23.1353	5.29748	130.135	0	0	0	0	1.68507	0	14.0357	0	0.328677	256.412	123.611	0	154.67
NOCLEBFK_00045	54.9377	2.51491	178.524	94.7181	27.9155	41.9623	39.1262	1.40961	64.4703	0	0	0	2.23482	0.157812	0	0	0	17.1419	36.3216	0.205471	152.852	20.9778	70.0134	133.728	39.3729	4.44724	30.6772	11.0035	0.129002	0.632985	0	0.209504	0.704666	56.0435	0.112218	0.313259	0	0.983699	0	0	135.356	9.47312	0.201574	0	0	0.30408	0	0	0
NOCLEBFK_00046	248.462	74.7993	233.263	92.3289	148.019	266.509	247.672	200.78	426.274	78.872	54.2609	27.529	11.0831	0.295333	0	0.11427	0	136.34	133.718	1.5381	323.106	29.721	190.151	90.6964	117.524	117.953	15.2577	61.6318	1.3278	0	0.460979	0.196036	0.219789	84.5127	40.5314	178.657	0.162395	31.1642	26.7336	34.6703	49.299	34.0495	0.188616	0.145753	0.130297	0	0	3.51737	81.2641
NOCLEBFK_00047	136.395	43.7728	211.033	20.6517	24.5793	28.1434	33.1304	204.091	63.0306	5.32807	34.2791	21.6054	4.53809	0	0.076449	0.060483	0.140662	68.736	8.94542	161.093	110.427	115.285	52.0137	51.2924	29.2855	18.8361	3.01135	42.2164	36.6098	0	0.081332	0.311286	0.116334	5.36077	23.8987	155.071	0.085956	26.1	0.151338	0.206191	0.070715	30.7573	2.5957	9.02619	36.4142	14.8344	28.0734	0.109515	107.825
NOCLEBFK_00048	14.8818	0	0	0.759507	0	0	0	0	0	68.4582	0	0	0	0	0	0	0	156.718	0	0	0	0	0	0	0	0	0	0	0	0	0	0	0	0	0	394.484	0	0	0	0	0	0	0	0	0	0	0	0	0
NOCLEBFK_00049	24.2548	0.908975	5.56279	10.4082	11.8719	0	0	2.37759	3.51333	0	0	0.190127	0	0	0.086784	0	0	35.0295	14.3952	0	22.5241	0	11.7596	0	5.7127	28.3664	0	3.74676	11.3871	0	0.092328	0	0	1.14949	0	0	0	0	2.06157	16.1506	45.2755	0	1.35998	0	0.15658	21.7123	15.2416	0.12432	26.513
NOCLEBFK_00050	102.281	0	0	0	3.6344	81.3195	0	0	93.1745	2.0564	0	0	0	0	0	0	0	69.9656	4.43423	0	0	0	91.2212	0	0.859857	0.311461	0	0	0	0	0	0	0	0	0	0	0	0	0	0.422772	0	0	17.1947	0	0	0	0	0	0
NOCLEBFK_00051	265.677	22.3641	47.9604	46.0875	21.0589	76.348	30.1531	213.035	11.045	6.1145	0	0	0	0	0	0	0.263866	130.779	10.3265	192.426	15.1746	0.220226	312.148	67.6333	172.02	68.104	36.4614	92.152	6.23237	0	0	0	0.43646	0	101.548	0	0	54.5748	0.851678	0	131.328	21.5142	0	0	0	0.282514	0	0.205437	0.365103
NOCLEBFK_00052	304.259	27.0023	65.7206	69.5611	107.929	77.7399	153.498	29.5939	92.2824	91.744	40.8963	92.0431	69.3838	91.6721	67.7636	20.587	44.8856	146.225	83.0907	24.1023	104.01	39.7097	70.2105	160.744	58.2859	48.7959	35.9134	64.0092	118.612	52.2425	73.8226	63.2781	50.8166	111.423	111.456	30.6952	26.0877	38.8913	29.6192	89.7751	92.769	76.7855	26.3354	41.0295	76.0962	137.979	80.4946	47.4493	44.9928
NOCLEBFK_00053	21.0825	0	0	11.8989	32.9363	70.1909	0.253978	0	0.214688	5.17002	0	16.1955	107.031	0	0.217427	0.860097	0	9.75134	33.5493	50.3602	119.374	0.667781	40.937	84.4121	11.3307	0	0.194648	33.6188	11.2662	0	0	0	0	12.0278	0	3.97132	0	0	3.87376	77.9947	4.62578	0	0.283938	0	0	0.642491	5.85805	0	0
NOCLEBFK_00054	131.375	76.142	0	4.60069	0	33.3035	42.353	99.4046	0	0	0	33.9884	0	0	0	0	0.106911	0	1.34486	0	0	0	0	0	0	0.692733	0	0.583398	0	0	0	0	0	0	27.6268	14.2686	0	0	0	0	0.107496	0	0.607039	0	0	0	0	0.083237	0
NOCLEBFK_00055	172.137	240.292	222.71	185.917	127.963	120.721	265.758	200.924	155.052	59.3178	298.316	100.503	6.40593	0.634882	0.388113	0.122824	0	88.9385	200.42	14.0525	176.435	77.2422	129.429	94.2496	162.373	28.3023	24.3912	8.57292	131.562	1.83031	0.660649	0.105355	0.236241	46.2662	31.7147	64.9029	0.261827	71.8702	0.076831	82.4868	43.1526	44.0844	5.77794	0.939978	64.2131	0.076458	0.154915	0.166794	0
NOCLEBFK_00056	36.5812	0	0	3.76715	0	76.7432	0	40.9388	0	0	0	0	0	0	0.095156	0	0	0	7.21902	16.5933	0.284966	0.219189	0.271454	0.867781	15.7465	0	0	0	0.079526	0	0	0	0	22.5385	0	0	0	0	0	0	0	0	0	0.096025	0	0	0	0	0
NOCLEBFK_00057	0	0	0	0	0	0	0	0	0	0	0	0	0	0	0	0	0	0	0	0	0	0	0	0	0	0	0	0	0	0	0	0	0	0	0	0	0	0	0	0	0	0	0	0	0	0	0	0	0
NOCLEBFK_00058	0	0	0	0	0	0	0	0	0	0	0	0	0	0	0	0	0	0	0	0	0	0	0	0	0	0	0	0	0	0	0	0	0	0	0	0	0	0	0	0	0	0	0	0	0	0	0	0	0
NOCLEBFK_00059	131.963	0	0.436849	18.0692	65.7827	78.6562	5.49301	1.11336	0.30955	0.128525	0	0.343407	0.680842	0.801292	1.41074	0	1.00944	0	17.3338	0	0	1.0832	1.78865	1.6337	6.73555	7.47507	0	1.10167	28.2965	0.321399	1.16734	0	0.238531	0.732777	31.4522	0.795289	10.2221	0.713536	49.0276	84.3431	91.9263	79.5558	116.269	0.790905	80.0366	8.02864	1.25133	0	0
NOCLEBFK_00060	111.902	0	0	0	16.532	0	8.00345	11.0219	33.1666	0	0	0.183056	0	0	0	0	0	2.31983	6.66134	0	135.624	32.8482	17.8773	15.0222	0	0	0.149606	46.3092	105.725	0	0	0	0	0	0	0	0	0	0	0	0	0	0	0	0	0	0	0.119697	0
NOCLEBFK_00061	69.3863	0	211.78	16.899	27.979	146.847	32.7632	166.789	104.016	125.417	0	0	0	0	1.30456	0	0.300041	6.61698	59.3403	1.08535	0	20.2839	80.0133	39.0901	53.8208	0	0	46.1712	29.8463	0	0	0	0.496297	0	0.711315	57.0877	0	39.3423	3.55095	47.5005	141.036	95.4721	0.212953	0	119.012	0.321245	0	0.116801	0
NOCLEBFK_00062	49.0449	97.0995	110.245	48.461	65.698	120.304	44.0294	99.0028	5.2338	0.160968	0	0.215046	0	0	0.196317	0.310637	0	0.628901	5.04868	0	89.3631	3.76843	103.887	77.7513	0.538454	77.8215	18.8053	127.53	0.164071	0	0.208858	0	0.298742	79.2324	75.9288	0.199208	0.220731	168.9	0	0	8.89813	0	0	0	0	0.193371	0	58.7769	0
NOCLEBFK_00063	203.757	0	0	0	0	0	0	0	0	0	0	0	680.672	0	0	0	0	0	0	0	0	0	0	0	104.759	0	0	0	0	0	0	0	0	0	0	0	0	0	0	0	0	0	0	0	0	0	0	0	0
NOCLEBFK_00064	0	0	0	167.011	0.833489	235.763	0	0	0	0	0	1.77198	0	0	0	0	0	0	0	0	0	0	0	0	0	188.035	0	0	0	0	0	0	0	0	0	0	0	0	0	0	0	0	0	0	0	0	0	0	0
NOCLEBFK_00065	50.9535	0	51.5873	0.468552	12.5956	5.0139	52.8805	46.3434	70.3279	0	0	0	0	0	0	0	0	25.3521	0.258713	335.856	0.200847	0.154487	37.882	64.2201	1.28765	21.9882	0	0	0.504457	0	0	0.273085	0	32.1365	37.2998	54.5117	0	8.24293	0.199149	0	0	0	0	0	0	0	0	1.44112	0
NOCLEBFK_00066	380.951	551.228	276.004	287.353	438.411	530.966	774.448	404.602	435.773	814.792	507.271	6.04084	0.887158	0.313232	0.153187	15498.6	3.10043	203.818	212.339	554.851	275.251	216.657	327.313	156.264	244.952	168.476	85.986	329.296	33.7986	5.02552	134.452	3.11876	2.5642	197.531	690.59	464.93	4.65041	241.691	9.09747	173.116	59.7969	116.547	16.804	2.31879	113.181	105.018	26.7508	2.08472	323.112
NOCLEBFK_00067	74.763	104.269	0	0	0	20.7686	39.3413	5.14591	82.9455	0	0	0	0	0	0	0	0	48.5999	0	0	108.909	19.8692	20.9591	3.2188	0	0	8.96384	0.261122	0	0	0	0	0	0	3.11972	42.4884	0	0	0	0	7.21707	0	0	0.131224	0	0.128085	48.2709	0.09314	0
NOCLEBFK_00068	135.796	70.9766	511.726	54.8744	49.0263	116.554	53.1449	314.218	976.884	0.401122	557.042	0.178627	82.8706	0.16672	0	0	0.300041	0.348262	65.8405	26.9167	207.223	18.5309	90.2475	95.6009	116.736	19.4412	6.86136	70.8941	0	0.16718	0	0.442662	0.744446	86.5238	0.118552	0.661886	0.366699	103.626	0.161407	156.796	57.9228	0.317711	21.9342	0.164559	58.4024	21.5234	77.131	0	11.6244
NOCLEBFK_00069	3.86055	0	0	0	33.2175	14.9502	0	0.515088	0	0	0	0	0	0	0	0	0	0	1.30547	30.1827	0	0	0	0	0	0	0	0	0	0	0	0	25.7493	0	0	0	0	0.308104	0	0	0	0	0	0	0	0	0	0	0
NOCLEBFK_00070	16.364	104.599	2.48452	16.9862	36.8932	67.2903	14.3897	15.8714	30.169	0	0	0	0	0	0	0	0	19.3854	13.7559	74.5468	0.080902	30.554	20.4611	0	18.7463	5.23367	0	0.732345	0.067733	33.4011	0	0	0	27.405	0	0.246715	0.091124	0.221353	0	0	24.1393	0	0.105837	0	0	43.5065	0	0	0
NOCLEBFK_00071	16.7854	86.1596	0	25.7537	0.643713	8.38605	0	20.0012	54.461	0	0	0	0	0.094615	0	0.073216	0	0	34.033	0	93.0269	44.8369	1.98	3.37581	0.169217	0	24.1916	0	0	0	0	0.251213	0	0	1.14375	9.67232	0	47.687	0	0	0	0	0	0	0	0	0	0	0
NOCLEBFK_00072	180.55	221.632	6.91611	32.3205	52.2825	107.234	216.445	0.932622	152.467	0	0	0	0.266147	0.187939	140.258	0.145435	0	84.995	35.6919	37.6834	2.01851	51.2355	144.734	98.1889	158.82	0	3.45589	63.3061	0.46089	0	0	0	0	5.44254	2.53918	142.51	0	92.5482	44.5776	122.462	7.82177	17.9073	0	0	0	0	0.183434	0	0
NOCLEBFK_00073	371.873	87.0509	30.8366	160.631	143.677	187.413	165.529	81.6768	110.276	124.839	58.3217	145.657	188.867	91.1611	77.2591	23.8047	77.3272	175.225	130.96	62.7912	85.9077	100.161	136.042	107.397	54.9579	67.6285	79.5343	115.901	109.724	73.9656	76.1366	75.6166	48.1496	184.62	222.507	89.4933	42.3423	43.4163	68.7216	82.3736	157.235	224.968	140.016	46.5569	99.4092	98.5982	98.6611	52.6034	56.8334
NOCLEBFK_00074	480.288	24.5816	20.8185	233.198	35.4366	79.2171	101.701	122.583	144.213	0	0	0.141081	0	0.263355	0.257588	0	0.236975	35.2078	153.023	470.099	76.369	27.6895	66.5019	44.1293	0.471005	3.5828	5.99567	109.011	72.0104	0	0.137022	0	0.19599	41.8453	35.8617	13.8532	0	0.117256	0.382442	0.347373	4.0506	0.627327	0	0.259941	0.464753	0	7.96828	0	0.163947
NOCLEBFK_00075	213.55	71.7117	116.563	81.2912	70.7369	293.659	92.6151	288.975	140.813	203.232	144.289	0	244.379	0	35.9715	0.168398	0.293725	113.189	101.813	1.275	156.169	128.211	81.6684	13.8649	67.4286	41.2358	0.381101	78.0033	0.266831	0.218213	0.226446	0.144448	0	150.333	148.707	73.5425	0.11966	104.448	69.5239	33.8707	145.893	18.8687	18.7623	0.107397	34.1789	202.946	166.838	0	707.572
NOCLEBFK_00076	0.265899	0	0.324804	6.1067	0.81067	30.0992	3.26731	36.3051	0	0	0	1.02131	1.34991	0	1.16546	0	0	129.305	1.04902	0.155139	0	0.089487	7.64687	0	0.426212	1.04209	36.5176	0	0.876621	0.119483	0	0	0.354702	0	0.169458	0	0	0.106105	0.461428	0.471507	0	0.681202	1.06538	0.705661	0	1.83675	0	0	0
NOCLEBFK_00077	111.29	0	81.7857	10.7021	14.8161	0	0.460129	17.1869	0	0.215321	0	0	0	0.134242	0	0	0	13.7405	25.4942	0	0	0.100818	11.799	2.39485	2.52095	0.521799	5.52473	0.131833	0.109736	0	0.139691	0.534644	0	15.6524	28.6373	42.3693	0.885792	0	0	0	1.9433	0	0	0	0.118452	1.16399	0	0	0.167141
NOCLEBFK_00078	89.6713	49.111	77.2518	36.13	3.19753	20.3855	0.120818	45.2334	83.949	0.50884	0.156681	0.113298	0	0	0	0	0.285461	110.667	5.85182	0.275362	24.6764	19.3776	38.6527	21.964	22.3167	6.06274	24.5377	0.830782	13.4849	0	16.5057	0.140384	0.629574	33.2017	0.902333	158.585	0	81.2642	0.204751	0	0.191348	0.100757	47.6798	0.521876	0	0	0.722477	3.63009	112.702
NOCLEBFK_00079	100.769	129.587	100.031	23.9914	28.0371	42.5811	31.8773	26.4673	284.285	48.4361	0	0	2.38018	0	0.109597	0	0	90.9332	40.0228	31.2204	268.04	41.9915	32.5156	16.7055	20.1402	8.81968	10.4984	22.7781	0.274785	0.112359	0	0.148754	0.500332	0	28.8433	0.889689	0.246453	2.79381	0	0	0	0.320294	0	0	0	0.107952	83.8825	0	0
NOCLEBFK_00080	0.994257	152.757	2.91484	0.811887	28.5614	0.789807	1.0181	0	3.61453	0	0	0	0	0.356437	0	0	0	72.0362	13.4486	0.23204	0	0.133844	9.1996	7.49423	0.15937	0.346367	0	0	0	0	0	0	0	0	0.506914	0	0	56.3386	3.27823	4.93659	0	0	109.267	0	2.35882	0.1717	0	0.124856	0
NOCLEBFK_00081	2.08835	0	0	0	0	0	23.7172	0	0	0	0	0	0	0	0	0	0	0	3.85196	0	0	0	2.13644	0	0	0	0	0	0	0	52.4088	0	0	59.2584	0.120992	0	0	105.304	0	0	0	0	0	0	0	0	0	0	0
NOCLEBFK_00082	201.275	127.69	530.959	222.135	307.811	505.83	484.956	414.509	779.263	255.062	507.417	113.459	112.905	0.174458	0.341277	0.135003	0.156984	366.431	331.975	848.614	580.683	359.389	324.685	404.821	254.605	471.97	78.5197	24.4997	31.089	0.174939	0.363078	0.694811	0.259666	269.625	297.732	869.394	1.15116	734.66	46.9537	0	29.3586	86.4388	86.238	86.2707	167.638	79.6689	134.178	0.366666	0.868852
NOCLEBFK_00083	176.106	250.107	189.471	102.178	61.4097	134.196	174.424	104.035	142.194	129.237	0.392707	0.425956	0	0.132521	0.259239	15.485	0.119247	115.712	163.338	125.956	130.944	114.852	81.5341	62.3122	77.2659	18.4152	16.5938	81.8597	25.9989	0.265773	15.8585	0.527789	0	23.5311	0.094234	432.071	0.145739	86.2637	18.8598	0.1748	0.239798	57.2002	6.9401	37.4098	3.50799	112.609	134.518	0.185683	356.727
NOCLEBFK_00084	110.18	6.63602	19.9254	25.843	58.5115	182.242	51.0314	104.769	4.15777	23.0893	0.13289	5468.73	138.951	0.538134	0.350901	0	0.161411	40.6553	68.2448	49.1624	159.729	25.4612	36.162	22.8576	151.184	0	7.85349	5.02051	9.82432	0.629552	0.279988	0	0	50.4424	2.10463	88.127	0.394539	0.798665	42.6338	0.236606	0.405732	0.512748	0	0.177053	0.158278	0.432044	0.525234	0	41.6526
NOCLEBFK_00085	63.234	0	0	27.6207	23.4896	40.3976	13.2772	0.16715	63.4357	0	0	18.4957	0	0.084209	0	0	0	35.2688	42.9991	166.105	39.9591	35.795	7.98882	14.4862	18.9764	14.0748	0	19.2685	0.068836	0	0.087627	0.111792	0	2.31026	43.5925	6.01763	0	0	0	28.5462	0.076188	0	35.6027	0	40.1983	0.811292	86.0533	0.058995	0.104846
NOCLEBFK_00086	74.3786	2.56134	0.191679	2.40252	21.6877	89.7479	58.9695	3.21025	3.12393	5.18821	1.25025	3.61628	48.7937	12.7978	2.476	2.17657	0.379644	1.76263	0.884378	0.366213	112.185	5.38654	4.12028	11.6484	33.8298	2.32325	13.1765	1.10488	6.43783	6.91009	13.9026	33.2328	7.95426	32.7955	0.800027	71.0469	0.463986	17.1569	1.08922	3.52454	7.12542	5.76202	0.718536	4.58079	1.73729	3.1163	0.137264	7.29091	36.0707
NOCLEBFK_00087	81.46	1.06696	3.12286	3.67701	14.8013	80.7712	6.30659	13.644	0	0	0.154313	0	0	0	0	0	0	1.63166	16.7662	0	84.5028	8.52557	2.1795	3.84865	117.534	11.1326	0	0.102278	45.9729	0	0.108375	0	0	51.0341	5.33217	74.528	0.114536	122.883	0.100828	0.686872	34.3932	0.297704	159.768	0.205595	0.643279	0.301016	0	15.6872	0
NOCLEBFK_00088	136.65	106.736	8.67944	36.4733	60.9768	5.7261	24.9907	2.19832	0.178268	0.296066	0.957224	2.47207	3.39813	11.1673	6.58977	0.428513	0.664377	57.4508	29.8312	3.36458	103.719	27.0317	49.8297	15.0533	155.488	86.9937	34.1843	51.9338	101.094	1.94346	0.768299	2.81802	0	91.2226	72.7806	13.0988	2.53742	36.3253	10.6327	20.2081	230.463	150.286	58.8246	1.00205	102.202	2.93423	2.52222	0.323288	2.52801
NOCLEBFK_00089	10.4594	109.945	0.228152	0	0	0	0.382509	0	0	172.778	0	0	1.18527	0	0	0	0	0	0	48.8205	39.553	0.377148	38.3003	0.426613	0	0	0	0	0	0	0	0	0.498307	45.2868	0.357097	0	0.184092	0.149062	0	30.0288	0	0	0.213815	0	0.147705	0	0	0	0
NOCLEBFK_00090	31.0809	106.073	158.845	6.97094	24.7403	94.1087	0	20.7036	131.498	156.981	0	0	4.77618	0	0	0	0	22.5708	32.3634	0	107.085	0	33.2859	4.45688	0	24.1557	61.4713	0	50.1363	0	0	0	0.185924	8.18674	49.5642	0.247957	0	0.111234	0	0	0	0	0	0.123295	0	0	0	0	0
NOCLEBFK_00091	74.0851	0	0.165746	8.7254	46.9757	0	0.277882	141.21	0	1.95055	0	0	0	0	0	0	0	0.127013	0.305891	0	0.118736	83.4746	0	0	29.4703	0	0.319452	0	17.1975	0.243885	0	0	0	0	0	87.1431	0	0.10829	0.235464	0	5.39122	2.89678	0	0	1.82416	0	0	0	0.15141
NOCLEBFK_00092	134.967	0.304626	0.911869	27.8879	116.324	0.592994	334.196	28.1537	89.1684	82.523	0.19826	0.143364	0	0	0.130878	0.103546	0.361215	97.1302	9.4242	59.2341	85.313	76.9764	5.04035	38.0231	52.2899	51.6209	74.9869	30.092	0	0	0.139239	0.177638	0	18.5589	36.9178	30.9437	0	292.998	0	0.176497	0.242126	0.382487	231.759	2.5094	0.118068	0.257828	0.261201	0.093743	0.1666
NOCLEBFK_00093	52.541	0	0	49.5186	0	0	60.1746	0	0	0	0	0	0	0	0	0	0	0	7.63513	0	0	1.10899	62.491	0	0	0	0	0	0	0	0.170733	1.74254	0	4.0012	0	0	0	0	0.158845	0	0.148446	0	0	0	0	0	0	0	0
NOCLEBFK_00094	65.9759	36.4372	0	47.5958	91.0789	0	0	127.519	0	0	0	0	0	0	0	0	0.400055	0	0	629.793	0.868176	0.333891	0	0.566524	6.75866	0	0	0	0	0	0	0	0	0	7.27122	0.441257	0	0	0	0	0	97.0077	0	0.438825	0.392292	0	0	0	0.553543
NOCLEBFK_00095	10.4133	85.8529	316.378	56.359	55.1284	163.757	93.9838	283.801	165.911	52.2196	0.321587	0	128.631	0.108521	0	0.083978	0	38.9907	121.337	22.042	310.246	92.8295	102.953	89.4706	75.1123	37.4367	46.4673	6.50098	3.4597	41.3517	0	0.144069	11.1452	44.0801	0.077168	128.388	0	2.99573	2.10125	0	3.14192	0	96.6149	0.214229	0	0	0.10592	27.5981	0.270234
NOCLEBFK_00096	17.6785	41.7529	100.504	13.4718	8.53178	14.1875	0.061995	0.646226	24.7348	0.043516	13.9086	0	0	0	0	0.041989	0	0.056673	6.75609	0	9.80116	0.448255	8.02428	12.1691	0	0	0.380101	11.2435	1.68549	0	0	0	0	4.87941	28.5522	10.717	0	15.7517	0.052531	0	3.82922	0.206804	5.96046	0	1.38847	0	3.91904	0	0
NOCLEBFK_00097	356.171	4.55465	0	36.9627	2.35259	71.4223	0.507956	0.44124	0	0	0	0	0.629596	0	0	0	0	159.736	73.2493	0	0	124.541	2.48103	4.53219	0	170.651	40.0976	0.436607	0	0	0.462632	0	0	0	0	0	0	0	8.17794	271.515	13.274	23.7224	0	0	122.003	0.428327	0	0	0
NOCLEBFK_00098	64.3176	156.31	887.67	165.329	148.294	210.988	187.925	499.613	43.1382	167.733	12.0736	0.323354	0	0	0	0	0	377.628	35.3002	255.807	4.42009	11.1061	85.0523	26.5356	124.686	0.586548	79.8087	2.07468	67.5972	0.302632	0	0	0	0	245.08	163.549	0.331903	0.268748	0.292182	233.278	0.819164	0	0.770984	0	0.2663	0	0	1.69148	0
NOCLEBFK_00099	85.3145	6.79741	37.1561	23.5078	15.4071	32.0014	12.3847	68.3493	22.9436	0.156167	153.012	0.069544	0	0	0	0.301371	0	25.5582	27.1844	98.8776	74.4662	19.7913	13.4928	59.8826	37.9606	11.795	1.81876	0.318716	32.1007	0.195262	0.202628	0	0.09661	34.1805	23.17	16.17	0.214147	0.462398	24.7588	38.9554	0.176178	2.41201	26.7793	0	1.08819	151.583	49.9217	0.090947	114.92
NOCLEBFK_00100	224.284	185.003	4.25309	79.9632	0.196578	0	1.48553	313.572	0.753433	164.337	0.385298	39.0058	0	0	0	1.00615	1.16997	174.911	44.4792	49.4319	0.507801	13.6706	1.08838	41.089	1.86032	76.5666	1.59391	0.255374	49.5288	0	0	0.345221	1.5482	0.198172	0	2.06475	2.85979	1.38938	103.723	120.051	91.9919	0.247775	0.664307	3.33672	0	0.501062	0.253808	1.8218	13209.2
NOCLEBFK_00101	68.0868	3.89501	246.789	2.92279	7.32896	0.631846	9.12219	5.37705	0.275393	0.228686	0	0	0	0	0	0	0	31.5694	25.1041	0	132.526	0	9.94552	6.90378	0.254992	0	0.249687	115.933	4.89497	0	0	0	0	42.592	0.202766	1.69808	0	0	0	0	0.773969	0	0	0	0	0.27472	0.278314	0	0
NOCLEBFK_00102	81.29	5.75067	13.2277	0	0	0	0	40.2437	0.256797	1670.13	0.196985	0	0	0	0	0.205759	0.358892	0	0	0.346195	0	4.89241	0	0	24.3718	0	0.116414	0	0	0	0	0	0.197881	0	0	0.659758	0.438624	34.9242	0.514841	0	0	0	0	0.524897	0	0	0	0.18628	0
NOCLEBFK_00103	35.2674	47.1944	41.8382	77.5743	44.7742	27.4474	33.8357	64.3227	22.9911	14.7984	65.7346	0	33.3894	0	0.111409	0	0.102493	0	43.8359	41.0053	38.8688	10.9922	44.4151	1.016	11.3061	12.12	7.67977	14.5975	11.499	0	0	0.075606	0	45.5715	16.0774	0.508722	0.062632	5.27427	0.055136	25.4659	32.9256	38.4737	36.8087	0	5.77901	0.109737	0.055586	0	0.070908
NOCLEBFK_00104	174.089	0	248.009	67.9687	1.17947	44.0802	174.698	33.68	1.13015	0	0	0	105.505	0	0	0	0	2.24071	19.6232	70.3389	59.7935	70.1596	99.0423	1.49113	31.7417	0	0	30.8364	0	0.195569	0.202947	0	0	0	0	6.19425	0	0.173672	24.7348	0.257253	0	0	0.249115	0	0	0	0.190356	0.136635	0
NOCLEBFK_00105	77.3049	99.6415	72.5995	7.2119	20.5556	141.141	59.5819	205.916	33.0968	246.156	0	0	0	0	0.364336	0	0	195.303	71.2091	0.484985	157.116	0.279746	2.0787	11.3917	8.66054	0	0.326168	107.181	19.4875	0.373518	0	0	0.554422	59.8963	0	14.4184	0	7.62904	0.721241	0	0	0	0.475788	0	6.90221	0	0	0	0
NOCLEBFK_00106	86.7798	0	0	51.4457	0	0.201801	0	0.542318	42.2188	0	0.269878	0	0	0	0	0	0	0	0.229081	0	107.772	26.9481	0	0	40.3943	0	0	0.178874	0.148893	0	10.4245	0	0	0	0.518079	0.180779	0	0	0	0	57.8431	0.867757	0	0.179783	0.160719	0.175482	0	0	0
NOCLEBFK_00107	174.599	237.331	282.969	87.5522	121.291	254.927	113.416	322.683	567.902	712.044	0.522493	2.26692	0.374536	3.96716	1.29343	0.613988	0.237986	85.7245	160.661	431.585	74.6289	74.8157	71.4593	145.591	173.596	124.048	14.8987	72.5513	105.215	0.176804	0.733898	1.75555	0.524869	124.358	121.741	169.135	0.775619	13.6597	1.19489	30.9318	97.629	142.633	0.112606	5.22099	5.36745	0.849348	3.26974	1.29701	0.658586
NOCLEBFK_00108	125.22	0	0	47.0894	0	0	0	3.1265	0	0	0	0	0	0	0	0	0	0	0	0	0	0	0	0	0	0	0	0	0.321891	0	0	0	0	0	0	0	0	0	0	0	0	0	0	0	0	0	0	0	0
NOCLEBFK_00109	500.879	415.824	59.4498	122.122	248.329	292.975	43.6061	354.888	360.704	0	2.01964	557.881	9.00807	0.908718	0.888821	1.4064	0.408848	1.89822	150.861	533.601	682.3	212.927	5.07112	166.166	187.307	0.883044	253.83	17.8481	0.742826	19.1356	3.7824	1.20638	0.676273	224.375	147.328	264.711	0.499677	240.331	77.8584	28.7671	285.291	262.785	0.580356	0.448469	111.855	2.62645	8.42587	0.636629	1.13142
NOCLEBFK_00110	36.2478	0.584655	0	2.63233	0.388271	0.42679	0	0	0	0	0	0	0	0	1.88391	0	0	0	1.61495	0	0	0.192869	0.179143	0	0	29.0733	0.224873	0	0	0.257519	0.400852	0.170466	0.191121	0.195711	1.09569	0	0	0	0	0.508114	7.66758	0.978787	0	0	0	0	0	4.22804	6.87459
NOCLEBFK_00111	18.6474	0	0	25.085	0	2.1406	0	0	0	0	0	0.207007	0.136805	0	0.094489	0	0.434639	0	0	0	18.0157	0	0.539103	31.8829	0	0	0.761312	0	0	0	0	0	0	0	0	0	0.531199	0	0	0	0	0	0	0	0	0	0	0	0.120279
NOCLEBFK_00112	0	0	0	0	0	0	0	0	0	0	0	0	0	0	0	0	0	0	0	0	0	0	0	0	0	0	0	0	0	0	0	0	0	0	0	0	0	0	0	0	0	0	0	0	0	0	0	0	0
NOCLEBFK_00113	0	0	0	0	0	0	0	0	0	0	0	0	0	0	0	0	0	0	0	0	0	0	0	0	0	0	0	0	0	0	0	0	0	0	0	0	0	0	0	0	0	0	0	0	0	0	0	0	0
NOCLEBFK_00114	0.052966	0.486317	0.0647	0.216255	0.107655	0	0.705073	0.047113	0	0	0	0.05086	0	0	0.046431	0	0	0.04958	0.059703	0	0	0.035651	0	0	0	0	0	0	0	0.047601	0.049397	0	0	0.072352	0	0.424032	0.10441	0.084543	0.229787	0	0.042949	0.045231	0	0	0	0.091468	0.231662	0	0
NOCLEBFK_00115	0	0	0	0.330839	0	0	0	0	0	0	0	0	0	0	0	0	0	0	0	0	0	0	0	0	0	0	0	0	0	0	0.100761	0	0	0	0	0	0	0	0	0	0	0	0	0	0	0	0	0	0
NOCLEBFK_00116	134.948	1.28067	0	0.961009	4.99668	0.311624	56.238	31.9629	14.3972	0.112787	0	0	0	0.140635	0	0	0	47.0035	18.7488	0.54932	3.0209	2.95732	50.2282	11.29	1.88642	53.298	0	40.052	0	0	0.146343	0	0	18.3269	51.5018	0.139581	0.154662	57.2314	7.21609	0	0	17.8221	0	0	34.4977	20.8657	0	0	0
NOCLEBFK_00117	166.009	13.2542	3.7471	20.5057	10.1469	0.119449	55.6778	24.343	11.662	3.718	0	0	0.152679	0	0	0	0	0.337819	11.3901	0.070187	42.3703	6.67999	4.36202	19.1651	1.97644	0.104768	8.68533	11.4878	18.684	0.162166	0	0	0	0.616221	41.2074	1.81911	0	10.4167	0	0	0	0.051364	0	0	0.23783	0	0	0	0.201354
NOCLEBFK_00118	600.942	215.175	409.392	65.8637	63.5331	113.324	280.197	328.819	552.261	174.249	0.400407	0.723848	288.17	0.13512	0.396484	0.313682	0.121585	268.704	216.673	280.602	177.84	347.354	62.9623	59.5739	425.924	192.227	130.502	101.113	148.449	0.135492	41.7593	0.179379	0.603342	158.68	430.446	311.8	0.148597	135.843	13.6046	115.135	267.605	437.735	36.7616	0.400105	80.0006	1.95267	0.131881	0.567973	0.504701
NOCLEBFK_00119	332.521	130.039	0.548898	75.6794	45.5645	181.004	142.026	161.344	328.92	29.3913	76.5779	0.143829	69.5785	0	0	0	0.241592	134.18	89.3141	92.2858	22.4133	204.458	119.114	72.1876	159.42	108.665	0.117547	68.6848	0.219471	0	12.4325	0.178215	0	49.924	76.6526	169.744	0.147632	20.6805	0.389892	0.17707	0.485824	28.5238	0.171469	0.265005	31.0344	0	0	0	0.167141
NOCLEBFK_00120	101.736	90.43	0	0.205631	0.409465	30.8059	0	0.179194	11.3344	0	0	0	40.1429	0	0	0.139719	11.0478	1.88579	32.2454	1.1754	76.6857	0	0.251895	41.8733	63.453	60.3555	0.158099	1.4185	0	0.18105	0.375762	0	0.268737	4.95345	60.7278	145.869	0	67.8488	0	6.66836	21.3996	15.3112	6.22679	0.356425	0	0	0	0.379475	0
NOCLEBFK_00121	57.2692	0.81146	0	0	50.1171	52.1273	0	0	18.1759	0	0.211249	0	0.201905	0.142575	0	0	0	0.148912	0	0	22.134	41.9735	9.5477	1.99846	33.404	35.3294	0.499374	2.24025	0	0	0	0	0	0	18.4517	101.319	0	9.64897	20.2905	0	0	0	0	0.140727	0	0	0	0	0
NOCLEBFK_00122	431.937	4.61419	20.9944	3.69329	6.43503	2.69463	6.02077	1.60923	1.56596	0.650185	1.20122	0.868617	6.31448	14.9983	0.792967	11.2926	0	3.8104	3.05891	2.11111	167.417	0.913289	46.3734	66.6332	2.53742	3.54516	7.45389	9.15591	0.994077	6.50361	5.06174	20.4493	0	8.64964	8.64735	0.804646	1.33737	0.72193	6.27904	2.13873	2.56725	11.9733	13.9798	0.400105	1.07303	44.1303	19.3865	0	0
NOCLEBFK_00123	414.129	0	0	0	0	0	0	0	0	0	0	0	0	0	0	0	0	0	0	0	0	0	0	0	0	0	0	0	0	0	0	0	0	0	0	0	0	0	0	0	0	0	0	0	0	0	0	0	0
NOCLEBFK_00124	356.829	0	0	0	0	0	0	0	0	0	0	0	0	0	0	0	0	0	0	0	0	0	0	0	0	0	0	0	0	0	0	0	0	0	0	0	0	0	0	0	0	0	0	0	0	0	0	0	0
NOCLEBFK_00125	172.915	528.519	264.653	508.566	269.726	145.231	210.655	353.512	150.262	8.59689	486.468	7.21917	0	0	7.18957	1.42203	0.275594	130.193	228.806	5.98149	482.947	221.963	132.032	18.3428	0.27388	2.97619	1.34091	245.732	159.98	3.37826	2.54962	0.406593	0.455858	1.40042	357.168	191.506	0.33682	170.183	0.29651	9.69558	157.67	10.2138	298.097	0.302302	0	0.29507	0.298929	0.643702	0.38133
NOCLEBFK_00126	0	0	0	0	0	0	0	0	0	0	0	0	0	0	0	0	0	0	0	0	0	0	0	0	0	0	0	0	0	0	0	0	0	0	0	0	0	0	0	0	0	0	0	0	0	0	0	0	0
NOCLEBFK_00127	0	0	0	0	1.25863	0	0	0	0	0	0	0	0	0	0	0	0	0	0	0	0	0	0	0	0	0	0	0	0	0	0	0	0	0	0	0	0	0	0	0	0	0	0	0	0	0	0	0	0
NOCLEBFK_00128	0	0	0	0	0	0	0	0	0	0	0	0	0	0	0	0	0	0	0	0	0	0	0	0	0	0	0	0	0	0	0	0	0	0	0	0	0	0	0	0	0	0	0	0	0	0	0	0	0
NOCLEBFK_00129	266.38	419.897	256.985	164.104	180.663	173.577	342.347	235.83	314.885	358.461	90.0482	41.0971	0.176363	0.249076	0.852679	0.481861	0.448255	113.294	206.753	312.947	136.189	76.5072	242.725	169.486	139.988	100.688	151.361	69.9571	169.502	0.124881	1.94389	0.330663	1.29755	164.38	85.7234	458.452	0.410879	214.478	31.7096	4.10675	67.3803	23.3766	31.1784	18.5615	17.4723	40.5543	26.1338	2.70471	286.704
NOCLEBFK_00130	65.1998	30.1318	0.207946	14.1616	34.0816	0	55.7814	38.1583	0.073675	0.06118	0	0.163467	0	0	0.14923	0.118065	0	21.6719	99.5894	34.9619	95.4136	57.1766	84.7167	114.9	10.0962	0.07413	43.1516	30.2661	8.41847	0.076495	0	0	0.113544	61.798	14.4293	37.8569	0.083894	25.6099	21.3438	0.100623	9.66271	20.643	35.0784	0	14.0682	0	0	0	0
NOCLEBFK_00131	95.2922	0	0	0	0	0	0	0	0	0	2.0086	0	0	0	0	0	0	0	0	0	20.516	0	0	0	1.81839	0	0	0	0	0	0	0	0	0	0	0	0	0	0	0	0	0	0	0	0	0	0	0	0
NOCLEBFK_00132	86.5345	0	0	0	40.5031	79.1489	0	0	0	0	0	0.262127	0	0	0	0	0	0	41.5396	0	0	0	0	0	0	0	0	0	0	0	0	0	0	0.186446	0	0	0	0	0	48.4062	42.0569	0	0	0	0	0	0	0	0
NOCLEBFK_00133	0	0	0	0	0	0	0	0	0	0	0	0	0	0	0	0	0	0	0	0	0	0	0	0	0	0	0	0	0	0	0	0	0	0	0	0	0	0	0	0	0	0	0	0	0	0	0	0	0
NOCLEBFK_00134	330.8	33.0224	2.58672	101.744	35.7649	46.8601	64.4321	45.2062	32.0765	1.41335	9.0387	6.10026	77.7499	8.13377	12.9943	4.30105	4.75738	20.6719	8.18383	3.70656	76.9019	109.547	42.1755	15.5469	51.036	30.562	1.42444	9.18593	4.87586	4.48589	21.0186	28.7948	14.1241	6.71512	70.0804	5.38189	3.13077	30.179	14.0429	1.25168	15.3313	17.696	1.21209	2.4085	58.6123	2.7427	5.29252	0.474862	10.2959
NOCLEBFK_00135	128.274	0	0	0	0	0	0	0	0	0	0	0	0	0	0	0	0	0	0	0	0	0	0	0	27.5049	0	0	0	0	0	0	0	0	0	0	0	0	0	0	0	0	0	0	0	0	0	0	0	0
NOCLEBFK_00136	152.024	89.0755	0	22.1226	19.0891	0	1.10966	28.6421	0	0.667639	0.205578	0	0	0	0	0	0	0	0.174501	100.26	0	26.6754	23.0349	10.7849	0	0	8.99041	0	0	0	6.78578	0	0	0	0	0	0	28.9111	0	0	0	0	0	0	0	0	0	0.097203	0
NOCLEBFK_00137	14.2949	5.46879	0.793711	0.497424	0.440223	0	0	60.1081	0	0.116759	0	0	0	0	0	0	0	0	0	0	0	0	0	0	0	0	30.5954	0	0	0	0	0	0	0	1.96697	0	0	0	0	0	0	0	0	0	0	0	0	0	0
NOCLEBFK_00138	27.4838	0	0	0	0	0	0	0	0	0	0	0	0	0	0	0	0	3.67528	0	0	0	0	0	0	0	0	0	0	0	0	0	0	0	0	0	0	0	0	0	0	0	0	0	0	0	0	0	0	0
NOCLEBFK_00139	143.943	145.934	51.1761	123.797	66.4325	71.384	55.5862	13.8476	27.9383	44.7594	2.92241	69.8147	12.3105	13.8066	13.5757	2.26117	3.74681	17.0144	33.6263	8.08452	60.1273	39.1165	33.9378	76.2375	63.6917	50.9685	31.663	7.67611	48.1899	4.83462	11.9344	1.8426	2.93569	19.9857	34.3358	42.342	2.32977	5.98462	12.6593	53.1886	28.5521	9.74463	9.79736	2.37942	79.2187	15.3426	7.91424	3.83833	1.27334
NOCLEBFK_00140	190.102	682.844	362.654	174.15	260.016	161.516	195.272	191.027	380.386	1.0005	25.3499	0.190946	0.757143	0	0.174316	0.137912	0.641468	305.642	190.747	291.443	97.0972	110.421	31.0797	79.2572	106.778	85.8989	31.679	62.8319	0.291367	0.178709	0.370903	0.709786	0.530525	149.126	324.552	726.99	0.391988	372.787	21.7398	105.314	105.131	449.999	187.348	0.527725	121.401	0.5151	0.347892	78.6593	0.665683
NOCLEBFK_00141	0.60437	0	33.2215	1.64505	0	27.8053	0	0	3.66188	0	8.29315	0	0	0	0	0	0	0	13.1707	0	30.3217	0	2.51895	0	0	0	0	0	0	0	0	0	0	0	0.128389	0	0.397124	0.643117	0	0	0	0	0	0	0	0	0	0	0
NOCLEBFK_00142	73.7169	12.9181	16.2558	151.806	32.2941	117.165	40.1374	135.23	16.7547	149.681	0	136.151	36.7488	3.2528	2.47456	0.223745	0.065044	2.26492	100.094	49.7865	186.677	78.3896	3.02538	37.4886	104.264	66.4491	61.4592	0.993816	14.004	0.289934	4.36265	1.63135	0.322767	316.086	217.012	58.8292	0.238482	3.4115	144.72	369.464	247.602	206.83	17.2656	0.071347	350.48	0.487484	0.282206	19.8512	0.089999
NOCLEBFK_00143	43.904	126.322	0	48.6649	143.614	0.170293	175.964	9.45797	0	24.284	0	0	0	0	0.15034	0	0	54.101	0.773255	0	61.3807	0.115434	0.643316	0.195861	0	0	0	0	95.6161	0	0.159943	0	0	3.04552	0	14.4926	0	0.136872	0	8.92065	0	0	0	0	2.03438	0	0	0	0
NOCLEBFK_00144	0	0	15.779	0	0	0	0.944798	0	0	0	0	0	0	0	0	0	0	0	0	0	0	160.227	0	0	0	0.80357	0	0	0	0	0	0	0	0	0	0.820738	0	0	0	0	0	0	0	0	0	0	0	0	0
NOCLEBFK_00145	20.2988	0	0	0	0	26.7981	45.1141	47.3958	86.6523	0	0	0	233.039	0	0	0	0	0	0	0	0	95.9502	0	7.63957	87.628	0	0	0	0	0	0	0.274451	0	0	0	0	0	0	0.400289	0	0	0	0	0	0.182416	0	0	0.144833	0
NOCLEBFK_00146	57.0851	87.1465	168.726	42.4783	51.6603	115.134	38.6891	49.072	6.75407	2.55829	10.3619	8.93877	5.03864	10.5514	4.80016	1.42414	34.5555	139.292	13.7333	23.8017	144.949	46.4395	41.2518	4.53387	57.9294	45.5436	0.966889	14.5791	6.01755	23.0063	16.2141	4.23484	5.84364	49.0874	10.6437	113.613	1.34928	13.9845	10.6902	10.1955	78.9241	17.7692	25.0741	3.9963	31.5032	15.3664	7.5442	20.3712	9.77652
NOCLEBFK_00147	110.942	133.886	451.765	68.3275	138.427	97.8835	166.344	176.657	325.951	2.81947	0.566195	110.38	0.43292	45.2444	0.224259	0.236566	0.068771	118.219	132.551	277.127	303.336	42.646	70.9055	90.4731	200.862	135.315	28.174	89.2398	118.264	0.383184	0.159056	0.405842	0.455016	159.061	329.009	267.536	0.252148	71.7313	10.8026	69.8606	51.791	56.3634	60.2315	19.1607	97.3783	63.8382	46.8452	0.107085	2.85469
NOCLEBFK_00148	73.2279	0	0	0	9.72404	38.1013	143.819	0	0	22.3168	0	0	0	0	0.128385	0	0	0	0	0	0	29.8689	9.33931	0	6.10362	44.005	0	0	19.3135	0	0	0	0	13.6041	0	0	0	21.9742	0	0	0.118757	3.37681	0	0	0	0	0	0	0
NOCLEBFK_00149	59.0118	251.622	0	0.166394	0	12.9495	0.500776	36.9753	0	0	0	0	0	0	0	0	0.131467	0	12.495	57.6378	0.427952	37.0866	5.09576	33.8833	58.923	0.425921	112.324	0	0	0	2.73656	0	0	0	0	158.637	0.160674	44.7546	1.273	35.6518	9.78172	32.5749	64.9425	0	0	0	0	0.307066	0.181906
NOCLEBFK_00150	48.8725	1.04782	83.6415	0	24.5872	12.7483	0	1.59878	80.4566	0.06152	0	0	0	0	0	0.178083	0	0.801197	9.55128	0	38.7224	0.05761	21.8322	2.63922	19.07	0	0	41.5085	22.0099	26.384	0	0.101837	0	0	10.8549	0	0.084361	0.068309	0	0	0.069403	0.073091	0.097982	0.075716	0.067687	0	0	0	0
NOCLEBFK_00151	69.2704	102.713	202.29	46.8032	103.553	5.98717	144.735	32.5539	64.2067	108.751	0	0	0	0	0	0.097251	0.339257	92.0132	103.529	204.043	56.1992	56.5351	62.5933	126.512	7.30487	1.09911	147.9	34.1867	152.864	0.12602	0	0	0.187054	26.7207	8.13219	1.62152	0	23.8369	0	36.4689	34.907	34.0076	21.6708	0.124045	40.697	0	0	2.90546	0.156473
NOCLEBFK_00152	320.907	124.256	128.498	98.5773	79.857	188.773	582.842	48.1376	17.8816	0.091097	0	0	188.687	0	0.44441	0	0	223.99	297.151	0	159.263	38.3029	139.139	98.7152	28.3399	13.7976	7.55921	41.8315	287.938	0.227805	39.1242	0.150797	0.169068	47.6969	136.182	80.0445	0	27.2092	0.219939	0	2.26095	0.108231	104.319	0.112117	65.9503	0.109435	0.221733	0	0.141427
NOCLEBFK_00153	37.8655	0	6.73314	1.95696	11.7717	3.6885	27.7304	0	0	0	0	0	17.1855	0	20.1681	0	0	3.47719	5.40274	0	36.9099	13.3886	0.898971	0	37.454	0.20872	30.6564	0.105466	0	0	0	0	0	0	69.7987	0	0	0	0	0	0	0.204655	0	0	0	0.103466	0	0	0
NOCLEBFK_00154	3.45217	0	115.774	61.8249	17.8605	0	0	0	79.5923	0.225574	0	0.301357	0	0	0	0	0	0	21.2251	12.8175	10.4358	58.7239	0	0.358413	9.80939	0	0	0	0	0	0	0	0	6.21614	0	108.315	0.309324	0	0	0	0	0	0	0	0	0	0	0	0
NOCLEBFK_00155	122.685	216.36	393.649	229.41	236.88	163.267	166.464	253.277	264.604	5.10145	1303.34	244.864	21.6623	0	0	0.1172	0.272565	33.5352	124.765	352.579	403.258	84.2835	165.657	106.338	481.473	149.382	24.5343	0.148734	113.281	0	0.472799	0.402125	0.901698	6.34805	66.233	676.132	0.832796	456.926	1.75951	43.9497	81.8054	0.144308	33.6607	18.9852	38.3541	2.18871	77.0154	0.21221	51.2909
NOCLEBFK_00156	207.917	0.429815	0.257322	44.9392	51.9504	59.405	1.94137	0.187376	25.1626	99.3268	1.39868	2.42737	2.40626	0.566393	2.40063	0	0	277.446	2075.54	215.333	40.9232	10.067	834.442	4325.36	80.3633	0	0	954.854	6140.54	30.6694	256.184	0	0.281009	0.863272	1.74527	0.374766	0.415257	0.504362	0.548341	49.806	1.02489	0.719565	0.241153	0	4.16474	1.45514	0.921358	0	1.17533
NOCLEBFK_00157	143.092	50.096	0	37.9908	147.909	160.874	219.065	69.6906	0.270725	0	339.331	0	44.4601	0	0	0	0.126119	0	47.5945	143.434	0	0	26.7888	80.7268	34.5925	42.0853	52.1592	3.02813	121.217	0	0	0.186068	0	0	5.78054	9.73757	0	0.124808	0	0	0.126808	0	0	0	0	0	0.136798	0	0
NOCLEBFK_00158	142.016	45.0159	115.09	81.0009	33.3551	110.762	71.6824	80.5906	215.901	4.94917	0.152394	0	71.5155	0.051426	0.1006	0.079591	0.09255	29.9713	53.3596	56.7795	144.007	82.1483	77.199	65.9895	50.3102	21.8883	19.4532	46.8164	27.8712	0.154703	0.107027	0.204814	0.22963	69.4853	94.3831	41.7005	0.226222	104.777	0.199149	0	20.2862	0.588002	93.2757	5.22824	45.1955	32.2045	22.6372	0.036028	174.608
NOCLEBFK_00159	47.5458	0.720378	18.9762	81.4455	33.01	253.818	143.407	57.7845	1.01867	0.169181	0.312563	0	38.2383	0	0	0.163243	0.379644	3.74559	63.6752	0	95.7762	89.9869	65.336	49.7298	31.3146	0.204992	54.1222	21.1309	0	0	4.82931	0.280052	0.627968	0	0.150005	1984.22	0.231993	1058.53	99.6638	0	0.19086	0	22.9033	0.624654	0	0	0	0.147789	0
NOCLEBFK_00160	90.5351	153.241	275.228	81.8038	60.3782	27.0475	8.22264	107.98	48.1091	0	0.209086	215.45	214.825	1.55226	1.1042	0.1092	0.12698	84.6004	82.7053	223.969	50.1527	100.15	72.4495	32.5471	82.2763	1.64554	47.9433	111.697	7.72869	0.424511	12.1879	0	0	82.3761	48.3662	84.3148	0	0.376981	0.683087	0.930676	0.766044	0.268916	0.540742	0.975	9.4632	0.407861	13.0845	2.17497	0
NOCLEBFK_00161	29.504	118.756	0	14.0538	12.357	0	0	0	219.626	0	0.237451	0	0	0	0	0	0	0.167382	17.7369	8.76357	0	0.240712	1.11791	0	0	0	0	13.0627	0	0	0	0	0.238531	0	0.113957	72.8485	0	0	0	0	0	0.152698	0	0	0	0	0	0	0
NOCLEBFK_00162	37.424	41.2337	0	101.402	19.823	33.512	18.9517	75.171	80.2173	184.871	0	0.130677	1.38177	0	0	0	0.10975	43.5667	25.924	12.0688	112.536	28.9451	0	1.24334	38.5008	36.3859	24.9908	0.239554	0	0	0.126917	0	0.181536	89.3231	70.2502	94.9054	0.268263	23.1337	9.32827	127.415	15.78	22.4291	0	0.120386	1.93716	0	0	0.170894	0
NOCLEBFK_00163	326.067	0	0	55.8097	0.192937	45.8088	32.0765	97.5223	13.3107	0.818751	0	0.546907	0	0	0	0.395007	0.229661	90.3676	71.2612	46.855	291.562	121.907	21.7205	53.3372	159.307	95.734	3.57576	0.250645	0.208633	0	0	0.338828	0.379882	134.985	0	2893.1	0	656.595	0.247092	0.673304	44.7978	0.243186	215.488	0.251918	0.900818	0	0	0.357612	0.635549
NOCLEBFK_00164	91.9669	0.306278	62.0989	18.4885	33.6967	4054.63	0.922254	79.5783	14.1191	291.961	0.26578	9402.83	150.636	0.807202	0.614077	0	0	35.2221	56.5135	0	0	0.067358	17.1425	24.0005	0.320814	2.61465	0.078535	0.704633	0.439895	1.07923	0.559975	0	0.133494	326.098	130.104	1.95838	0.098635	0.079866	25.8755	91.0932	76.7645	13.0751	0.114561	0	0.553974	0.518452	0.962929	0.062834	0.111669
NOCLEBFK_00165	29.9738	42.0126	29.2911	1.86229	78.4045	120.345	0	5.56412	219.287	489.336	1.73057	0.500559	0	0	0.456964	0.180766	0	115.891	89.0194	0.304143	127.497	39.4727	146.654	86.6205	43.2406	45.6265	0.409092	110.343	58.4315	0.23424	0.243078	0	0	81.1768	206.804	0.927388	0	184.716	5.6538	258.823	384.441	74.7859	73.4003	0.691707	43.9034	0	0	0	289.972
NOCLEBFK_00166	150.633	0	12.8076	1.42695	2.60465	12.8403	2.14727	0	0	0	2.32054	0	0	0	0	0.484782	0	0.654311	6.69715	0	0.917504	2.58765	3.059	11.9743	0.280105	0	0	0.30761	13.3146	0.314095	1.30378	0	0.466219	0.954831	0.222735	0	0.344475	0	0.606498	0	1.41699	0.298456	0	0.309172	5.80413	0.603552	2.44579	0.438888	0
NOCLEBFK_00167	0	0	0	0	0	0	0	0	0	0	0	0	0	0	0	0	0	0	0	0	0	0	0	0	0	0	0	0	0	0	0	0	0	0	0	0	0	0	0	0	0	0	0	0	0	0	0	0	0
NOCLEBFK_00168	97.7091	2.14504	0.151082	0.378735	0.335183	27.6327	23.8099	0	53.314	60.1848	0	0	36.5756	0.110849	0	0	0	29.6387	25.2339	29.2981	20.7804	29.6366	2.01043	0	27.7552	0	0	0	0.090613	0	33.5662	0	0	0	30.3469	0	0.121905	44.1229	35.8436	0.877281	17.6512	0.10562	0	0.109412	57.0232	0	0	0	0
NOCLEBFK_00169	31.2182	0	6.56751	0.177028	0.117503	0	0	0	0	0	0	0	0	0	0	0	0.139869	0	0	0	0	2.10125	0	0	0	0	0	0	0	0	0	0	0.69407	0	0	62.0182	0	0	0.150485	0	0	0	0	0	0.137155	0	0	0	0
NOCLEBFK_00170	134.618	66.4554	0.112707	28.442	60.6989	67.7054	36.8471	13.4596	113.327	63.2682	0.122525	0	0	0	0	0.127982	0	50.0077	35.361	43.282	60.2323	9.81238	54.7998	22.1284	130.887	85.5802	14.337	58.4704	0.337986	0.082921	30.9778	0.10978	0	5.79773	21.6391	113.754	0.090941	20.3238	33.7844	0.654451	1.49634	0	0	0	28.5298	26.3704	0.322844	0.057933	53.4357
NOCLEBFK_00171	403.862	102.806	216.599	75.764	92.8945	52.7185	239.103	433.966	35.2472	241.378	0	0	0	0	0	0.178746	0	245.838	5.5197	0.300745	255.527	35.7356	55.7505	53.8641	5.57706	0	12.1356	0	5.66457	0.231623	0.480723	0	0	64.6031	31.372	20.4038	0	170.311	0.223625	1.82808	1.4629	34.3341	0	0	0	0	0.22545	0.323649	0
NOCLEBFK_00172	203.248	122.511	41.44	106.641	61.4947	120.136	120.098	162.272	124.56	62.0031	0.79734	0.768754	0.127012	0	0.17545	0	5.73008	10.679	18.725	16.6989	8.05652	50.5182	63.4399	8.57159	49.4054	0.087155	14.3719	72.2249	71.5563	0	8.21297	2.02415	33.6406	56.4572	77.1697	49.7606	0.19727	77.9497	0.086831	2.12945	80.1726	89.3891	10.3105	0.531159	0.633113	0.086409	0.087539	0.062834	0.111669
NOCLEBFK_00173	358.969	208.602	80.7116	222.495	243.104	212.109	360.19	186.946	183.905	199.116	213.755	273.683	226.838	244.101	201.85	95.7559	123.848	267.903	200.499	138.749	182.718	126.075	165.234	148.258	172.683	149.791	118.427	209.404	161.052	153.84	168.58	166.915	117.702	221.753	244.828	143.909	95.0617	130.385	130.84	268.271	157.374	220.328	149.925	89.0505	182.65	199.875	228.023	105.065	145.934
NOCLEBFK_00174	134.638	68.5408	0	42.6091	0	0.177898	25.5921	65.6566	15.8177	1.73846	78.6299	0	0	0	0	0	0	10.4817	4.34187	0	42.8002	21.7061	17.3612	0	0.861527	0	16.0284	0	1.05005	0.080506	0	0.213165	0.119497	21.9036	19.5816	0.079683	0.088293	14.6559	0	3.49464	0.145276	0.076497	0	0.079244	5.59644	14.5415	2.50752	0.168737	59.8762
NOCLEBFK_00175	94.4545	267.782	110.521	70.4312	25.8669	38.898	35.4299	0	136.492	1.42928	0	335.11	0	0.178218	0	0.137912	0	0.930701	28.9146	0	0.696037	0	15.9128	66.7668	34.4239	12.6424	0	27.653	29.8651	0	0.556355	0	0.265262	0.950715	84.6546	27.7707	0	15.5526	0.172538	0	13.3832	0.169811	0	0.175908	51.7369	0	0.347892	0	0
NOCLEBFK_00176	170.105	102.423	310.813	56.6318	44.0611	184.042	82.2016	156.368	86.0208	0	0	0	0	0	0.178156	0	0	50.6039	13.0576	1.18576	253.425	130.226	13.4681	95.161	64.012	154.696	0	3.93524	23.0783	0	0	0	0	0	0.12952	0	0	19.4635	0.529016	11.7724	0	0	60.0247	0.179783	0	0	0	0.127606	0.453564
NOCLEBFK_00177	246.7	0	2.59786	38.0723	0.110836	20.9551	50.9253	11.7868	186.774	0.235173	0	0.15709	0	0	0	0.11346	0	21.7454	28.9511	71.396	0.143157	39.0901	20.0462	10.0889	116.822	0.427431	39.9278	0	0	0	0.15257	0	0	0.111736	0.834071	48.313	0	0.652809	0	0	0	25.7053	47.1941	0	0	0	0	0.205437	0
NOCLEBFK_00178	62.6815	79.2085	83.101	14.5875	27.632	39.8337	52.8881	17.7671	17.4341	16.7599	0	1.20379	24.2908	1.12355	1.392	0.057963	0.067401	4.7722	35.4212	89.4297	93.5388	33.9207	92.796	42.3784	95.0469	81.6672	8.06733	19.2724	80.5166	0.300439	0.077943	0.099439	0.222974	77.746	0.692415	92.7791	0.164749	42.9548	0.725161	33.6908	16.7389	0.428219	25.9278	0.961122	0.132185	0.072164	0.073108	0.052476	0.18652
NOCLEBFK_00179	173.965	162.759	0	18.2235	29.0302	56.4455	128.849	106.082	155.895	41.5776	0	0.13715	0	0	0	0	0.115186	67.2502	65.686	121.333	101.488	28.2639	86.2581	50.24	127.291	32.715	0.224177	44.2501	0.209279	0.128361	0.266407	0	0.190529	15.6084	56.5264	146.742	0.281552	50.4971	0.123928	0.168847	3.24284	2.07348	0.163506	0	0	0	0	0	0.318759
NOCLEBFK_00180	82.0152	0	0	3.62226	0	29.1689	33.1083	68.3923	18.4301	0.141707	0	0	0	0	0	0	0	7.75107	4.44456	6.21154	115.245	22.559	20.7071	7.88049	20.857	32.2802	38.9896	10.5849	2.16658	0	0	0	0	11.0418	0	0	0	53.1822	0	25.8704	0.159865	0.16836	0	0	0	0	0	0.247578	0
NOCLEBFK_00181	20.451	0	0	38.1085	30.4503	93.7428	75.4864	0	0	0	0	0	248.697	0	0	0	0	0	0	0	94.6826	0	0	0	0	0	0	0	0	0	0.221777	0	0	0	0.151552	0	0	0	0	0	0	0	0	0	0	0	0	0	0
NOCLEBFK_00182	233.687	0	11.4756	42.2949	1.02292	2.83182	94.9951	0.746098	55.4691	0	0	0.322178	0	0	0	0	0.270583	3.76883	29.3099	0.195758	44.7742	0.225831	0	27.5887	33.2092	17.6785	47.3951	37.5038	0	0	0	0.1996	0	3.55197	4.06268	100.578	0	0	0	0	0.408093	0.143259	0	0	0	0	0	0	0
NOCLEBFK_00183	113.878	58.0435	0.10775	8.01331	21.0962	39.8528	90.9571	69.9092	10.9183	14.5825	0	0	0	0	0.077326	0	0.071138	54.3316	17.7978	0	27.7111	95.5898	20.0736	0	29.6215	20.2813	2.35365	21.8938	0	0.317098	0	0.104952	0.117669	0.180742	5.90269	85.2124	0.260826	10.067	0.076537	0	5.65061	0.150655	60.7898	0	0.069757	28.2573	162.657	0	3.24823
NOCLEBFK_00184	132.296	33.7927	0.733451	8.88673	0	0.298105	0.614836	29.4636	29.2777	0.071929	0	0	0.127012	0	0.087725	0	0	0.374703	29.7795	0	40.4577	37.8549	9.50973	13.2574	0.080204	0.348621	0	0	8.7979	0	0	0.119067	0.400483	29.5273	0	8.8127	0	0	0.173661	36.0824	32.7831	4.70019	39.1797	0	0	0	0	0.942514	0
NOCLEBFK_00185	137.545	0	7.21408	7.42598	0	9.68869	0.175287	18.6524	0	0	0	0	0	0	0	0	0	0	0.482388	0	2.47164	0	9.41779	0	7.95727	0.074543	0	0	0.188118	0	0.079823	0	0	0.058459	37.0376	13.4759	0	8.94845	0	0	2.29032	0.073091	0	0.151431	0	0	0	0	0
NOCLEBFK_00186	828.074	8.08182	0	118.913	0	206.834	140.765	4.97398	305.338	0.334944	0	0	11.8288	0	0	0	0	125.628	86.1437	76.128	293.601	0.62731	0	0	0.373473	49.5129	0	0	0	0	0.434593	0	0.621625	95.8013	2.67282	0.414514	0	0.371903	141.112	0.550885	0	20.295	0	0	0	0.402368	0	0.585184	0
NOCLEBFK_00187	564.918	125.654	229.135	140.824	131.216	512.108	172.916	268.666	134.865	0	0	0.41792	0	0	0	0	0.701984	571.584	133.928	307.256	223.559	217.363	136.047	135.196	52.3215	0.758085	165.995	166.249	0	0	0	0.517831	1.16115	286.557	72.6704	116.529	0.428968	33.6923	0	10.2901	0.70582	0	184.843	0.385007	0.344181	0.751593	0	0.27327	0
NOCLEBFK_00188	0	0	0	39.0347	0	0	180.258	0	0	0	0	0	0	0	0	0	0	0	5.47383	24.0833	0	0	0	0	6.81097	0	100.992	0	0	0	0	0	0	0	0	0	0	0	0	0	0	0.51837	0	0	0	0	0	0	0
NOCLEBFK_00189	101.897	0	393.107	0.685768	10.7726	102.959	0.45864	66.1347	97.6976	434.614	0.59478	0	0	0	0	0	0	0	0.252434	4.96521	0.195972	9.49643	0	1.79032	54.2044	0.585124	0	0	0.328142	0	0	0.266457	0.298742	0	0	0	0	0	0	0	0	0	0.256371	0	0	0	0	0	0
NOCLEBFK_00190	10.8642	0	0.192333	0.32143	4.58704	0	50.9481	0	11.4481	0	0	0	0	0	0	0	0	0	7.98656	1.46985	0	0	0	0	0.630953	0	6.17826	7.48342	0	0	0	0	0	0	52.5806	0	0	0	0	0	0	18.6896	0	0	121.403	0	24.2408	0	0
NOCLEBFK_00191	130.609	0	0	0	36.1179	0	0	2.55331	0	0	0	0	0	0	0	0	0	0	12.9426	0	27.4517	0	0	0.70249	0	0.714285	0.160909	0	0	0	0	0	0	0	0	66.571	0	0.163637	0	0	0	0	0	0	0	12.57	0	0	0
NOCLEBFK_00192	0	0	0	0	0	0	0	0	0	0	0	0	0	0	0	0	0	0	0	0	0	0	0	0	0	0	0	0	0	0	0	0	0	0	0	0	0	0	0	0	0	0	0	0	0	0	0	0	0
NOCLEBFK_00193	27.919	169.524	2.37086	5.33375	2.32649	38.0999	20.333	34.7937	1.55076	43.7833	2.37912	1.14691	1.70541	1.47189	1.96317	0.517728	0.24081	5.0312	11.612	94.9488	50.5607	75.9715	8.02722	0.852536	12.8032	35.4975	12.0682	1.97109	2.18761	1.47594	2.36706	1.59874	6.77149	7.03608	1.90298	13.9446	1.03008	28.716	3.62721	80.1297	8.71654	6.37478	2.05097	10.9621	60.9233	2.44937	7.96662	0.093743	4.33161
NOCLEBFK_00194	0	164.726	0	0	0	0	38.9034	0	0	0	0	0	0	0	0	0	0	0	0	0	0	0	0	0	0	0	0	0	0	0	0	0	0	38.5527	0	0	0	0	0	0	0	0	0	0	0	0	0	0.170392	0
NOCLEBFK_00195	70.642	2.94154	1.50947	26.4878	1.25581	14.9288	4.42874	1.64874	123.361	151.438	3.5554	1.97765	1.30697	1.29208	2.1665	0	0.332189	1.5423	3.48224	0.240328	0	11.5058	11.3308	0.235209	0.165062	0	0	0.18127	0	2.2211	0	0	0.824208	64.7068	0	0	0.202994	0.164368	72.0163	1.94777	0	0.527627	0	0	1.1401	25.9635	52.7864	0	0.229819
NOCLEBFK_00196	740.77	329.99	324.226	154.492	117.745	280.814	347.181	225.695	351.547	193.127	338.202	451.389	963.709	20.4845	56.6917	391.325	47.2284	161.597	89.0435	120.203	319.828	196.732	204.001	117.282	158.11	105.675	57.8613	79.0767	67.2885	55.3754	55.9911	1.12788	0.562017	97.6936	197.752	195.347	1.14196	116.508	7.03704	152.531	0.34163	9.26439	0.602882	0.279525	153.512	103.77	200.856	0.264535	581.436
NOCLEBFK_00197	280.045	15.2593	77.0458	17.6585	39.8024	157.289	42.4421	24.2045	124.475	0	0	0	0	0.16151	0.157974	0	0	42.1724	79.2209	0	39.424	17.7092	6.53451	41.5731	0	0.156947	0.707121	76.1334	5.67711	0	0	0	0	0	43.757	97.623	0.17762	65.0076	3.75271	0.213038	26.8873	0.461674	0	0	0	0	0	0	0.402184
NOCLEBFK_00198	91.4128	0	0	0	0	0	0	0	0	0	0	0	0	0	0	0	0	0	0	0	0	0	0	0	0	0	0	0	5.0072	0	0	0	0	0	0	0	0	0	0	0	0	0	0	0	0	0	0	0	0
NOCLEBFK_00199	40.2974	0.141761	144.618	0.425507	19.6761	0	12.3791	0.123601	0.601385	0	0	0.133432	0	0	0	0	0	3.38192	1.25305	0	0	22.8212	3.30119	1.90434	0.668202	0.484079	0.54525	0.122303	3.05409	0	0	0	0	64.2526	0	0	0	0	0	0	0.112676	0	0	0	8.35156	0	0	0	0
NOCLEBFK_00200	20.5595	0	0	39.4118	0	0	0	0	0	0	0	0	0	0	0	0	0	0	0	0	0	0	0	0	0	0	0	0	0	0	0	0	0	0	0	0	0	0	0	0	0	0	0	0	0	0	0	0	0
NOCLEBFK_00201	2.4937	0	0.380767	0	0	0	0	0	0	0	0	0	0	0	0	0	0	0	0	0	92.0603	0	0	0	0	0	0	0	0	0	0	0	0.207908	0	0	0	0	0	0	0	0	0	0	0	0	0	0	0	0
NOCLEBFK_00202	97.7841	0	0	19.2241	0.38667	0.094451	20.357	26.1442	2.63469	0.06837	0	0.091339	0	0	0.333537	0.06597	0	0.08904	17.1551	0.110997	36.8742	0	0	0.108632	0.15247	0.248527	20.0805	0	0.069688	0	0	0	0	1.36433	28.6129	2.62298	0.187508	14.5755	0.082534	0	0.077131	0.406146	0.108892	0	0.075223	0	0.083207	0	0.106143
NOCLEBFK_00203	233.785	234.688	158.399	81.452	164.727	68.7132	415.583	24.3994	0	5.8253	0	0.598642	0	0	0	0	0	62.4425	32.3252	0	0	122.948	0	22.7834	6.99505	0	0	0	0	0	0	0	0	192.463	0	3.88187	0	34.3307	0	0	0	0	0	0	2.46508	0	0	5.48017	0
NOCLEBFK_00204	174.76	155.021	198.511	128.764	72.7537	136.65	32.4274	78.2454	184.657	0	0.173057	0	0.165402	0.116798	0	0.090383	0	21.4703	38.0462	19.009	256.134	37.192	6.68091	11.9066	22.3514	39.157	29.6591	52.8776	3.72357	0	0.243078	0.310114	0.173844	36.1379	71.7584	0.695541	0.128448	17.3691	0	44.5236	6.76311	37.2817	0	4.15024	1.13366	0	3.41996	0.163653	186.141
NOCLEBFK_00205	156.144	109.549	281.286	129.529	122.129	130.575	156.39	144.033	205.917	821.947	144.865	0.063105	35.4484	0.235594	0.230435	0.182311	0.105998	129.307	85.1875	188.724	237.275	101.825	103.864	76.4032	129.988	125.744	41.8261	22.9051	41.8872	0.118121	0.183866	0.156382	0.35066	55.3435	184.992	277.671	0.518184	59.0564	16.5932	65.8025	13.8017	17.341	53.4895	0.465079	36.0154	2.83721	5.23127	0.453893	143.805
NOCLEBFK_00206	112.618	63.2768	189.859	54.8687	117.827	136.38	62.0179	21.2028	92.9874	109.269	2.907	0.233565	0.411616	0.217996	0.568595	0.112463	0.130774	92.896	125.114	59.51	275.354	55.9915	45.8228	14.0745	76.0271	68.2823	29.2055	15.9135	27.2052	0.218597	0.226844	0.289403	0.324469	485.765	156.306	123.255	0.319653	278.435	182.768	641.799	259.361	142.006	328.569	18.1461	462.74	0.210023	0.354618	148.549	76.9931
NOCLEBFK_00207	0	251.796	0	0.470894	96.8931	0	0	267.14	4.39251	0.331594	0	0	0	0	0	0.319956	0.372051	0	63.9617	106.052	4.44072	6.8314	0	0	104.266	0	0	19.0841	0.337986	0	0	0	0	0	0	0	0	0	0	0	0	0	0	0	0	0.398344	0	0	0
NOCLEBFK_00208	104.54	0.452545	0	0	0	63.7212	0	15.1252	124.275	0	71.8654	0	0.187668	0	0	0	0	75.7113	29.5008	0	0	25.777	81.9039	7.76791	0.829542	6.18131	0	7.54827	0	0	0	0	0.197246	0	0	0	0	4.72031	0	1.0488	0	0	0	0	0	0	0	0	5.27995
NOCLEBFK_00209	27.3335	0	7.81783	23.8169	1.53569	0	32.631	1.77899	0	0	0	0	17.5996	0	0	0	0	39.0658	0.901758	0	0	51.5137	1.16702	30.1502	0.106861	0	0	0	0.097684	0	0	0	0	0	0	28.9393	0	28.5183	0	97.2535	0.216234	0	62.8865	0	99.0106	0	0	36.8361	0
NOCLEBFK_00210	125.559	128.094	289.61	395.163	308.047	532.468	637.982	606.012	437.811	93.8377	0	2.51183	172.337	0	0.20846	0.329852	0	158.492	345.246	12.4871	519.61	298.994	178.404	175.985	324.379	78.9073	69.4233	97.7438	358.718	0.641142	0.443554	0.848816	0.634442	184.021	162.009	402.543	0.234385	39.4754	6.19003	141.966	5.39916	49.3467	0	0.210364	61.8709	0.205332	0.416036	0.59725	0
NOCLEBFK_00211	0.800004	0	0	45.4563	0	0	0	0	0	0	0	0	0	0	0	0	0	0	0	0	0	0	0	0	0	0	0	0	0	0	0	0	0	124.763	0	0	0	0	0	3.78296	0	0	0	0	41.7553	0	0	0	0
NOCLEBFK_00212	87.0386	0	0	0	0	0	0	0	1.59728	0	0	0	0	0	0	0	0	0	0	0	0	0	0	0	2.95791	0	0	0	0	0	0	0	0	0	0	0	0	0	0	0	0	0	0	0	0	0	0	0	0
NOCLEBFK_00213	108.236	0	0	87.538	0	0	7.87332	0	0	0	0	0	0	0	0	0	0	24.9141	63.335	0.690171	1.03513	0	56.2049	38.5018	9.00645	0	0	302.972	114.395	0	0	0	0	0	0	0	0	0	0	0	0	0	0	0	0.467733	0	0	0	0
NOCLEBFK_00214	18.7823	0.441508	51.9129	38.5197	22.6942	21.5723	26.4118	35.4921	4.49515	19.8459	78.8479	0	0	0	0	0	0	0	26.6349	81.4066	83.77	2.33034	46.5368	1.38389	36.3495	27.2128	0.203778	47.0799	16.2335	0	0	0	0.115461	68.5167	4.41291	1.61684	11.9435	25.2134	21.4038	35.4034	1.19314	13.0828	102.751	0	3.62778	0	0.151428	0.108693	0.096584
NOCLEBFK_00215	82.1332	152.813	88.5386	99.4986	35.3753	110.401	95.7646	194.274	112.444	69.8568	30.503	0.185353	91.2585	0	0	0.066936	0.15567	132.445	129.46	50.6799	256.072	32.2211	110.662	78.9199	99.7057	22.8631	7.49845	55.5551	134.417	0.260213	0.09001	0.114833	0.257493	100.725	31.9228	209.563	0.190254	86.4232	22.6105	81.0078	37.0954	29.3411	2.4307	0.170756	43.5813	0.333343	0	16.3619	29.8323
NOCLEBFK_00216	226.054	510.181	3.60662	84.0075	106.145	87.7697	86.3545	257.538	392.93	11.0089	298.96	1.94918	206.573	0	0.485296	1.27982	0.446462	119.535	199.685	396.214	358.003	118.991	163.592	28.8723	125.563	0.642856	74.147	161.931	157.501	0.995053	0.172099	1.31736	3.93862	18.6536	95.3769	376.062	0.545648	243.591	0.640462	0.21815	52.0726	23.7953	13.0975	3.59134	70.9232	0.637351	0.161422	22.1305	2.47102
NOCLEBFK_00217	38.1795	0	0	0	46.3449	0	0	0	0	0	0	0	0	0	0	0	0	0	0	0	0	0	102.439	54.5035	0.63748	0	0	0	0	0	0	0	0	0	0	0	0	0	0	0	27.0889	0	0	0	0	0	0	0	0
NOCLEBFK_00218	410.737	0	0	0	0	0	0	0	0	0	0	0	1.88879	0	0	0	0	0	0	0	0	0	0	1.69957	0	0	0	0	0	0	0	0	0	0	0	0	0	0	0	0	0	1.27084	0	0	0	0	0	0	0
NOCLEBFK_00219	20.2538	0	0	84.9907	0	0	0	0	10.7134	0	0	0	0	0	0	0	0	0	0	0	0	0	299.675	161.915	0	110.736	0	0	0	0	0	0	0	0	0	0	0	0	0	0	2.73721	0	0	0	0	0	0	0	0
NOCLEBFK_00220	161.274	73.6622	0	53.2229	74.3968	86.1321	216.351	194.056	29.0262	2.29887	3.60367	1.48906	7.13454	4.25627	1.01953	1.34435	2.73567	305.648	108.81	102.012	31.0409	72.737	262.244	63.0912	7.22388	11.7328	7.22571	114.307	52.473	0.871019	23.4105	0.345946	4.00791	25.287	6.67082	162.165	0.191053	104.654	2.9433	16.2696	4.79394	1.40701	90.7575	2.74358	108.453	13.4734	2.79775	11.684	57.3196
NOCLEBFK_00221	246.274	36.2171	0	23.2821	61.1174	3.57615	108.529	71.6975	295.704	66.8119	0.227741	26.8432	0	1.22964	0.300679	0.118943	0.138309	76.4157	40.2093	101.863	71.7358	16.9688	57.4696	23.1116	11.5457	0	31.3594	3.9246	0.125645	0.154128	0	0	0.228776	26.9411	104.598	0.152554	0.507108	31.0698	0.297613	173.547	2.7813	23.2862	83.4397	0	43.9425	0.148083	0.15002	0.323048	0
NOCLEBFK_00222	77.5341	146.66	18.3603	31.2917	17.1403	88.6622	108.347	63.671	0.128813	0	0.19762	0	7.17739	0	0	0	0.240033	0.139305	17.7811	4.51506	115.641	78.5311	5.58232	0	81.7003	19.3116	4.55477	0	17.9896	0.133744	0.13879	0	0	0	16.218	72.5427	0	0.118769	31.6357	0	0	33.4232	0	0.131647	0	0	0	0.093441	0
NOCLEBFK_00223	136.08	0	0.500179	0	27.2795	0	0	46.9843	70.5307	0	0	0.262127	0	130.279	0	0	0	35.1353	16.0004	75.0163	0	3.21543	7.3385	5.76748	53.0542	0	68.1247	0.120132	35.1985	0	0	0	0.182074	0	0	145.572	0.134529	0.10893	0	0	0	0.116557	0.3125	0	0	0.117853	0	0	0
NOCLEBFK_00224	408.68	0	105.036	73.5926	30.274	3.2378	147.037	43.0764	49.4445	62.4994	0	0	17.3205	0.108237	0	0.167516	0	19.2182	74.3266	89.2056	77.5699	117.217	82.1468	62.3414	95.9191	51.8534	24.9262	0	1.85804	0.108535	0	0	0.322204	38.7681	49.2582	117.202	0	49.1555	0.314363	3.56922	0.881352	24.7515	0	0.106834	0	0	0.105643	0.151658	36.2513
NOCLEBFK_00225	213.331	29.7777	142.02	36.9917	61.5163	43.5719	35.6054	184.18	192.708	119.261	126.427	50.507	0	0	0.94449	0	0.236975	0.825182	34.9988	97.2658	93.3399	5.14234	20.4527	17.0029	79.3643	49.3061	0.230603	0	0.071759	1.05632	0	0	0.13066	120.619	64.1703	25.4411	0.482703	0.390854	15.3827	58.9377	26.9246	92.0917	2.13044	0	166.382	0.084574	41.2123	0.123	24.2642
NOCLEBFK_00226	513.061	1697.18	724.057	336.761	128.812	1794.87	438.043	1311.89	56.8728	483.324	0	0	0	1.25293	0	0	1.12743	469.795	499.529	654.157	211.638	94.0965	610.052	316.12	166.943	1.21753	0	1.23044	0	0	0	0	0	63.9737	0	0	2.7558	656.038	0	0	0	0	1.60038	0	482.02	0	1.22289	0.877776	0
NOCLEBFK_00227	121.373	127.155	67.9628	54.5672	43.8655	201.028	78.767	170.746	131.964	153.771	115.689	0.095063	0.376947	0.088727	0.086784	0.13732	0	177.835	102.775	92.7644	144.068	88.8909	28.5944	65.6888	93.1487	11.1224	29.7562	18.9952	81.3777	0.088971	0.092328	0	0.66031	19.0003	51.1048	47.1132	0.390306	23.0708	0.171798	9.01158	30.5048	0.084541	108.118	8.49493	33.0384	0.256445	0.0866	0	49.9329
NOCLEBFK_00228	114.307	5.307	0.167221	48.6265	28.3807	8.97146	0.700889	32.0246	113.279	0	0.181787	0.131452	78.012	0	0	0	0	0.897008	20.8314	56.0698	37.3753	53.3502	2.2252	39.0851	28.5258	0	1.93378	0	2.10614	0	0	0.162879	0	13.651	54.7016	0	0	30.4817	0	5.01681	0.222009	0	0	0.1211	0	0.118203	0.239498	0	0.152758
NOCLEBFK_00229	17.5747	0	0	0	0	0	0	0	0	0	0	0	0	0	0	0	0	0	0	0	0	0	0	0	0	0	0	0	0	0	0	0	0	0	0	0	0	0	0	0	0	0	0	0	0	0	0	0	0
NOCLEBFK_00230	11.7595	439.732	113.812	9.69488	0.30643	13.0241	0	0	170.298	0	0	0	0	0	0	0	0	35.5637	80.0414	0	0	94.3732	1.13106	5.6819	92.0722	0	0	0	0	0	0	0	0	0	0.288245	0	0.891581	0	0	0	0	0	0	0	0	0	0	0	0
NOCLEBFK_00231	90.4697	0	0	14.0657	0	0	0	0	0	0	0	0	0	0	0	0	0	0	0	0	0	0	0	0	0	0	0	0	0	0	0	0	0	0	0	0	0	0	0	0	0	0	0	0	0	0	0	0	0
NOCLEBFK_00232	71.5282	1.36732	4.99771	0.072002	7.26436	37.4736	1.95027	0.439216	0	0	0	40.6417	0	0	0	0	0.056889	11.8856	29.6583	24.4473	0	0	9.5258	6.20318	0	0	0.110717	0.062086	0.05168	0	0	0	0	0.481795	2.29274	0	0	0.056297	0	0	0	0	0	0	0	0	0	0	0
NOCLEBFK_00233	0	0	0	0	1.15153	23.6277	0	36.2839	85.3283	0	0	0.233155	0.616341	1.08807	0	0.168398	0	0	0.273692	2.55	0.212475	0.817153	0	1.94109	0	0	0	0	0	0.218213	1.13223	0	0	0	0	0	0	0	4.42424	1.4352	0	0	0.83388	0	1.1521	0	0	0	0
NOCLEBFK_00234	59.179	0.241978	101.552	6.89999	7.95457	22.4922	0	45.1495	76.9896	1.70485	0	0	0	0	0	0.082251	0	0.999127	50.6646	9.41046	0	28.258	8.45241	17.3365	135.159	33.155	1.58221	23.4859	0.173772	0	30.5266	0	0	28.5934	19.5755	0.105493	0	0	0.205804	0	15.7712	3.24082	4.07294	0	0	0	0	0	0.132338
NOCLEBFK_00235	91.3126	0	0	71.9332	33.3036	68.5552	9.28508	80.6557	0	0	0	0	0	0.142575	0.278906	0.11033	0	3.7228	39.27	79.6363	115.125	31.9084	14.1226	65.5859	0.892472	6.51169	1.12359	6.44071	0.466188	110.228	0.296722	0	0.21221	1.52114	45.2167	161.884	0	70.9707	43.7557	0.188061	20.5102	79.4716	0	0	59.8827	0	0.139157	0.099885	0
NOCLEBFK_00236	10.4919	0	0	23.9384	0	66.6449	0	1.09794	0	0	0	0	0	0	0	0.107009	0	1.29987	38.6097	143.316	7.15592	42.164	14.8551	0	0.123658	0	36.3257	42.0983	0	0	0	0	0.205822	0.526913	0.393324	5.90163	0	0	0	0	0	0	0	0	0	0	0.134968	0	0
NOCLEBFK_00237	74.2688	0	0	0	0	0	0	2.76023	0	0	0	0	0	0	0	0	0	0	6.52932	0	98.1194	0	7.50151	0	0	0	0	0	0	0	0	0	0	0	8.17427	0	0	0	0	0	0	0	0	0	0	0	0.723865	0	0
NOCLEBFK_00238	208.421	0	75.5194	7.88808	0	184.63	52.7552	0.208301	0	121.528	0	0.22487	0	0	0	0	0	0	2.3757	0	0.204925	0	0	0.267445	40.9152	0	0	0.206114	94.5331	0.21046	0	0	0	37.9073	57.7573	103.321	0	0.186896	0	0	0	0	0	0	0	0	0	0	87.0187
NOCLEBFK_00239	103.559	0.140492	0	0.140565	17.8205	97.771	3.94841	51.4473	35.9984	0.098983	309.786	142.287	0	0	0	0.095509	0	2.19145	10.0898	0.160697	71.4612	27.2515	55.2733	39.633	19.7562	0	4.53909	0	0	0	0	0	0	0	2.54516	50.4693	0.271467	0.109906	0	0	16.8617	25.9897	0	0.121823	0	0	0	0	0.15367
NOCLEBFK_00240	57.1379	2.15893	0	1.72805	21.3152	0.840528	2.4559	0	74.1244	0	0.749386	0	0	5.68991	6.18369	0.097846	0.568886	59.2962	31.169	0	0.246912	3.13367	0	2.2557	0.33921	18.7991	0.110717	4.84274	0	1.3947	0.526297	58.7509	1.31739	0.578154	0.539468	0.627476	4.72783	1.23854	0.367237	11.0076	1.48719	6.26483	0	0.249607	0.780985	0.243636	0.123411	0.442914	2.20402
NOCLEBFK_00241	303.334	0.243859	47.3019	57.5809	0	0	0	93.1269	89.7952	2.40535	0	0	110.734	0	0	0	0	0	0	190.509	7.94853	0.16089	28.6926	42.5862	0.191574	134.484	36.3922	45.233	0	0	10.4775	0	0.956594	0	0.152337	22.9637	0	0	0.207404	0.282578	0	0.816501	0	0	0	0.206396	0.418191	0	0.266733
NOCLEBFK_00242	32.138	283.446	298.23	102.115	4.21427	190.956	328.025	113.885	97.3622	0	0	0.497747	0	0	0.454397	0	2.50821	208.159	53.7543	0	632.768	145.49	241.106	101.23	347.72	58.6877	0.813587	0	42.1533	0	0	0	0	95.2363	0	0	0	21.0982	0	0	0	72.1525	1.1868	0	0	0	0.453432	0.325467	0
NOCLEBFK_00243	267.084	247.916	195.901	49.5913	32.1455	0.086924	58.2655	78.1774	171.321	0	232.262	0.420299	155.547	0.078457	0.230216	0.060713	0.070598	42.7748	43.8114	38.3065	229.735	96.2194	53.3057	28.2929	46.5155	40.026	22.396	53.0093	1.79575	0	0	0.104156	0.116776	0.896852	43.9062	79.037	0.086282	0.139728	20.0524	0	1.91656	11.1386	0.100213	0.07744	46.452	0	0	0.21986	0
NOCLEBFK_00244	101.163	104.891	370.567	124.793	87.4819	555.006	79.7743	738.411	305.815	1.00483	0	229.43	68.8757	0	0	0	0.30748	0.356897	112.025	174.996	215.53	115.225	47.8316	108.131	84.8463	0.221369	87.1703	37.025	8.1936	0	3.20019	0.453637	0.339068	53.8177	145.142	85.0131	0.250527	181.658	0.661634	37.4101	2.26718	61.4276	32.735	0.337279	0	7.79131	0	0.239393	0.709084
NOCLEBFK_00245	38.414	0.937544	6.62322	21.5748	18.9278	22.2656	10.1632	2.77929	50.3524	58.9207	0	0	0	0	0	0	0	12.7317	13.9844	0	68.2754	0.061856	0	6.92694	3.75631	1.84085	0	0.242656	0	0.082591	0	0	0	0.878749	1.87417	52.7267	0	0	0	11.19	0.074519	0.078478	0	0	0	0	0	0.057702	0
NOCLEBFK_00246	106.581	0	2.2642	0	0.069768	0	0	0	0.089134	11.3986	0.136746	0	0	0.092292	0	0	0	14.7483	0	60.6827	0	0	0	3.52813	0	0	0	0	0	0.092546	0	0	0	0.070334	0	24.0909	0	0	0	0	0	0	0	0	0	0	0	0	0
NOCLEBFK_00247	4.48261	0	0	0	6.70672	0	28.1144	0	0	0	0	0	0	0	0	0	0	0	0	0	0	35.4519	0	0	0	0	0	0	0	0	0	0	0	0	0	0	0	0	0	0	0	0	0	0	0	0	0	0	0
NOCLEBFK_00248	75.552	0	0	22.976	0	67.4961	0	0	0	0	0	0	0.282862	0	0	0	0	29.6242	0	0	80.5453	0	0	0	0	0.194099	0	0	0	0	0	0	0	0	1.98847	109.828	0	0	7.73505	0	0	0	0	0	0	0	0	0	0
NOCLEBFK_00249	39.543	0.152807	0	4.43375	51.5519	31.5307	28.9881	6.52835	0.907544	0.10766	0	0.143829	0	0.402727	0.525212	0	0	59.4488	4.89624	71.4865	0.131072	24.1962	41.2029	65.3452	28.4507	68.6166	0	131.569	64.9635	0	1.11753	0	0.399616	45.525	0.190916	1.4656	0	94.9151	11.9567	1.06242	3.76514	0	0	0	0.236903	1.03466	0	0.658332	0
NOCLEBFK_00250	70.3376	4.40302	20.5181	29.8848	33.113	20.3273	29.622	52.656	93.0399	0.041921	0	0.056004	0	0.052271	0.051127	0.04045	0.047036	16.5968	15.1205	29.7411	94.2141	32.2295	6.27158	20.8482	7.8996	26.6164	0.183083	12.4739	24.5691	0	0.054393	0	0	43.9777	23.7884	0.155639	0	22.5286	0.101211	12.8243	24.072	0.049806	1.13503	0.103188	0.092246	0	0	0.07324	0.065082
NOCLEBFK_00251	435.362	221.822	216.802	416.483	453.587	501.932	439.217	299.349	338.94	134.949	243.9	407.246	281.617	304.946	291.113	172.073	331.255	482.092	418.8	292.981	364.955	199.797	250.995	254.535	332.071	191.521	175.393	373.714	369.429	296.115	305.21	275.481	177.198	336.635	540.332	317.404	157.014	198.306	165.052	245.785	320.53	292.461	168.065	131.185	218.116	326.578	511.205	253.011	294.662
NOCLEBFK_00252	171.496	0	0	0	0	0	0	0	0	0	0	0	0	0	0	0	0	0	0	0	0	0	0	0	0	0	0	0	0	0	0	0	0	0	0	0	0	0	0	0	0	0	0	0	0	0	0	0	0
NOCLEBFK_00253	180.602	0.267413	0.32019	0	0	72.0968	24.1568	55.0247	184.458	339.507	0.348081	0	0	0	0.22978	0	0.211393	0.981466	0.295463	217.78	41.0583	0.176431	2.94975	0	66.1748	0.228287	0	0	80.0796	0	0.244459	0.311876	0.349664	0	2.33872	104.458	0	48.3242	0.454874	0	0	0	0	0	0	0	0	0.164583	0.292497
NOCLEBFK_00254	64.8157	0	0	0	0	0	0	14.922	0	33.4335	0	0	0	0	0	0	0.30748	0	0	0	0	0	0.953454	0.870855	0	98.62	0	0	0.279327	0	0	0	0	0	106.67	0	0	90.0682	0	0	0	0	0	0	0	1.97526	0	0	0
NOCLEBFK_00255	266.384	538.967	0	50.1275	0	0	556.974	28.46	0	0	0	0	0.944394	0	0	0	0	25.7714	9.22606	0	776.149	155.259	0	265.983	5.96353	0	0	0	0	0	0	0	0	0	0.47421	0	0	0	0	0	9.6538	0	0.851813	0	0	0	0	0	0
NOCLEBFK_00256	669.383	41.9028	178.513	336.31	64.9315	244.708	125.871	589.586	450.329	0	0	0.285803	55.1526	0.533505	0.260912	0.412846	0	157.972	386.152	291.047	21.3571	81.5361	164.492	123.049	5.72499	0	56.9931	17.2896	191.889	0.534975	0	0	0.794076	1.01643	13.2779	614.495	0	79.1003	0.516502	0.351856	43.9248	0	0.340725	0	0	0.256996	0	0.186881	0.664252
NOCLEBFK_00257	273.392	136.094	351.029	43.7259	59.8942	107.075	91.4546	55.3876	125.795	56.518	0.60357	0	0.144218	0	0.099609	0.078807	0.091638	42.3336	116.299	55.6897	69.5043	73.1936	15.7707	23.2289	45.17	17.6152	0	3.00033	0.083248	0	0.105972	0.135197	0.151578	0	16.6557	20.1142	0.223993	0.181372	1.28171	0	10.596	0	127.348	0.100519	0	0.098114	0	0.285385	49.4508
NOCLEBFK_00258	53.5923	1.1273	0	49.0632	2.05877	55.5466	21.0741	120.157	0.119557	0	0	0.132633	0	0	0	0	0	31.0308	6.38341	0	0.120869	26.6823	25.3879	32.0222	34.6492	0	0	0.12157	0	5.71013	0	0	0	76.8867	74.6469	0	0	0	0.119847	13.5528	36.4005	176.811	0	0	0	0.119265	0	0	0
NOCLEBFK_00259	32.5727	1.76323	86.5603	145.475	0.090074	0	0	0	62.6022	0	0	0	0	0	0	0	0.107219	40.8199	4.79552	190.511	0.698043	32.7521	62.6711	2.88486	0.213106	6.36835	4.38211	19.0736	0.292207	0.119483	0	0.158185	0.177351	0	0	49.5518	0	0	0.115357	0	0.215611	0	0	0	0	0	0	0.083477	0.148356
NOCLEBFK_00260	138.199	0.514931	176.089	18.1351	112.781	0	0.310109	0.179586	42.7281	23.9444	0	0	0	0	0	0	0.081412	0	16.8407	59.6054	7.06699	2.85378	2.77691	0	0	0.087918	13.3094	0.1777	0.073958	0.090723	0	0.12011	0.269325	5.72272	2.57339	0	0	48.6616	0	0	43.384	72.9303	0	0.089301	0.558823	0	0.088305	0.063384	0
NOCLEBFK_00261	158.904	215.06	336.556	0.65402	1.73644	0	576.72	8.54903	82.637	0	0	0	0	0	0	0	0	0.599785	58.5016	0	0	0.431275	3.20467	127.326	14.3787	39.6205	28.1591	139.296	0.469425	0	0	0	0	0	169.056	449.126	0	1.5341	0	0	0	0	0	0.566815	0	0	0	0.402314	0
NOCLEBFK_00262	262.051	0	41.4026	0	0	2.493	118.26	0	0	0	0	0	0	0	0.550222	0	0	0.293772	9.55128	0	0	0	0	0	0	0	0	0	0	0	0	0	0	1.92915	0.200007	0	0	0	0	149.144	0	0	0	0	68.0026	0	0	0	0
NOCLEBFK_00263	83.944	0	0	1.6991	7.41118	0	46.0224	34.4782	39.1086	0	0	0	0	0	0	0.164926	0	0	23.5883	0	0	0.160061	0	0	0	0	0	0	0	0	0	0	0	0	0	0	0	0	0	0	0	0	0	0	0	0	0	0	0
NOCLEBFK_00264	123.342	0	5.25577	59.5328	0	0	3.6715	7.44165	0	1.54629	0	0	0	0	0	0	0	17.6766	13.4719	0	0	0	0	4.91379	15.326	0.208179	0	0	0	0	0	15.3579	2.23205	0	0.761684	141.822	0	42.5415	0	0	0.193826	0.612375	0.27364	0	0	0	0.418191	2.85163	0
NOCLEBFK_00265	75.2576	71.5334	0	0.062453	0	0	0	0.054424	0	0	0	0	0	0	0	0	0	0	3.51734	44.9087	0	0.041183	0	4.1227	18.0946	0.053287	0.048017	33.5498	0	0	0	0	0.081619	0	0	0	0	0.048831	0	0.072331	0	0.05225	0	0	0	0	0	0	0
NOCLEBFK_00266	0	0	0	0	1.78096	0	0	0.701459	0	0	0	0	0	0	0	0	0	0	0	0	0	7.43121	0	17.5622	4.74024	0	0	0	0	0	0	0	0	4.30898	0	0	0	0	0	0	0	0	0	0	0	0	0	0	0
NOCLEBFK_00267	0	0	0	0	0	0	0	0	1.31232	0	0	0	0	0	0	0	0	0	0	0	0	0	0	0	0	0	0	0	0.634716	0	0	0	0	0	0	0	0	0	0	0	0	0	0	0	0	0	0	0	0
NOCLEBFK_00268	175.228	0	0	5.65882	0	0	101.981	0	0	0	0	0	0	0	0	0	0	0.185341	0.223182	0	0	0	0	9.7233	59.5073	0	0	0	46.5637	0	0	0	0	0	0	0	0	0.158019	0	0	0	0	0.226663	0	0	0	0	0	0
NOCLEBFK_00269	131.219	71.9291	68.3153	86.4047	86.101	57.9092	150.856	131.429	89.8469	29.5619	69.9315	82.957	90.5905	138.667	95.1897	31.0901	46.1554	74.7581	72.851	236.918	54.0808	67.0837	53.6026	72.5685	69.5876	27.8596	59.2594	45.0097	78.5977	65.9066	73.6697	38.5784	78.9581	110.134	138.823	27.6806	48.6879	37.6868	64.0085	78.7194	73.7582	65.4125	36.3708	99.1392	60.0595	111.236	73.2871	66.1313	63.3781
NOCLEBFK_00270	224.97	209.916	74.2025	146.24	128.074	328.418	116.029	154.169	52.9774	157.738	0.122036	0.264738	0.233277	0	0	0.063736	0.148228	103.23	98.5126	0.643427	128.268	104.661	36.1961	56.675	154.819	16.4076	2.23574	23.6185	0	0.082591	0.171413	0.437371	0	43.247	18.7417	171.587	0.452895	446.882	1.0366	40.4143	76.0838	0	343.596	1.70722	0.072676	1.90444	74.0386	35.1408	0.102549
NOCLEBFK_00271	111.223	213.189	25.387	27.2746	0.154732	0.453552	128.39	0.406291	0	0	0	0	0	0	0	0	0	0.427569	33.7237	0	0	3.22816	0	3.1299	74.8629	13.1276	0.537692	0.201012	57.8927	0.4105	0	0	0.304658	292.008	0.291099	61.3522	0.225102	0	74.9055	0	0.185191	0	0	0	85.4283	0	0	0	0
NOCLEBFK_00272	49.8307	0	0	0	0	0	0	1.14384	0	0	0	0	0	0	0	0	0	0	6.34163	0.562718	0	0.649167	0	45.7108	0	0	0	0	0.117765	0	0	0	0	0	0	0	0	0	0	0	0	0	0	0	0	0	0	0	0
NOCLEBFK_00273	0	0	0	0.110799	0	0	0	0	0	0	0	0.208468	0	0	0	0	0	0	0.367069	0	0	0	0	0	0	0	0	0.38216	0	0	0	0	0	0.14828	0	0.289672	0	0	0	0	0.17604	0.092697	0	0	0	0	0.094954	0	0
NOCLEBFK_00274	0	0	0	0	0	0	0	0	0	0	0	0	0	0	0	0	0	0	0	0	0	0	0	0	0	0	0	0	0	0	0	0	0	0	0	0	0.822998	0	0	0	0	0	0	0	0	0	0	0	0
NOCLEBFK_00275	812.719	847.557	1210.19	370.437	513.898	737.903	533.811	615.189	329.439	871.816	0.510519	0	141.99	0.344556	0.337011	0.26663	0.930128	290.776	435.945	240.007	853.493	352.438	675.383	608.093	244.952	211.607	91.7184	765.056	0.844965	1.03651	13.983	0.457418	0	1.83805	361.877	60.1875	1.51569	344.559	238.839	141.343	320.778	290.547	1224.81	5.78152	134.988	0.995861	0.672591	3.37944	0.857992
NOCLEBFK_00276	59.0509	77.8136	148.022	153.951	88.4332	67.1862	112.116	110.96	315.942	8.93094	41.495	0	0	0.110258	0	0	0.297641	56.7732	61.7083	125.181	219.721	80.4035	15.9977	63.5051	74.0463	68.9999	0.289637	0.108279	0.09013	0.77393	24.5528	0	0.328218	1.42843	90.3983	194.132	0	24.3493	0	0.145434	24.3405	0	16.9	0	0.194577	0.21245	0.107615	0.077244	0.137279
NOCLEBFK_00277	203.165	237.435	13.3659	0	15.8283	74.8798	0.30282	2.63047	7.16727	11.9034	0	0	119.357	0	0	0	0	0	0	111.463	0	72.0562	44.7421	0	15.6428	4.12087	2.78497	48.6733	92.0795	0	0.2758	0	0	65.2406	0	177.564	0	0	0	0	0	0	0	0	0	0.255349	0	0	0
NOCLEBFK_00278	42.8818	0	51.5126	5.28978	49.018	102.414	0.728368	0.903863	0.351823	0.584307	0.134939	0.097576	0	1.18393	0.356311	0	0	49.2722	11.225	11.739	35.5684	10.9434	17.9151	24.6026	0.08144	2.30097	0.079746	0.357749	86.2088	0	0	0	0	0	0.06476	63.3632	0.100156	0	0	0.120127	0.082398	0.086776	0	0.089891	0.883953	0.263223	0.266666	0.255212	3.62851
NOCLEBFK_00279	0	0	0	0	0	0	0	0	17.3497	0	0	0	0	0	0	0	0	0	0	0	0	23.5566	0	0	0	0	0	0	0	0	0	0	0	0	0	0	0	0	0	0	0	0	0	0	0	0	0	0	0
NOCLEBFK_00280	12.8473	3.57453	0	43.513	23.343	16.8159	59.1994	44.6714	2.02187	5.87635	10.8566	47.1032	25.1998	17.7948	18.9409	4.45508	1.8838	27.8786	25.6716	0	6.13218	4.32367	5.84142	10.0038	3.74419	15.2577	2.29143	18.5033	41.0717	9.4467	15.7939	0.694811	2.33699	32.706	40.1938	14.0253	8.05809	6.52479	4.05356	11.0456	35.5144	16.4566	2.00554	1.03318	15.2398	38.826	19.4115	4.39999	5.86475
NOCLEBFK_00281	73.752	6.7685	3.58099	14.4891	31.8831	14.4014	6.00373	7.8228	17.2282	18.8532	9.01519	34.2247	18.0161	17.1471	20.5588	5.56445	19.2869	19.6425	7.13063	3.78094	34.4294	27.5209	11.1895	22.7311	28.6887	6.71882	18.6472	5.56784	19.8948	8.59717	16.548	29.0055	6.58631	23.3949	46.7073	8.37208	8.82039	17.6088	23.8299	8.0256	27.5246	12.7807	23.8451	4.50419	3.41648	19.4509	24.1593	6.87836	2.92693
NOCLEBFK_00282	197.247	43.7876	2.75506	16.3243	4.39897	8.82244	20.0157	1.51983	1.47896	0.736876	5.0825	1.50946	15.961	4.53282	0.179739	0.568811	0.496069	27.0623	11.2477	383.453	35.0473	26.6356	26.8337	4.05883	485.48	188.512	41.8901	0.060155	1.6023	0.61423	1.46603	165.158	1.09406	6.72201	12.4573	4.86364	0.33682	29.2366	9.25112	0.242389	0.99756	1.45912	0.860647	0.483682	2.05387	0.059014	14.3486	0.557875	1.22026
NOCLEBFK_00283	26.5135	0	0	5.95384	0	0.263269	7.87332	71.694	0	0	0	0	0	0	0	0	0	23.0814	0	4.95019	0.232012	13.5629	3.31517	0	0	0.461822	40.5741	0	0	0	0	0	0.707366	0	1.01383	8.72624	0	1.058	0.460102	0	0	0.226415	0.607039	0	0	0	0.463856	0	0
NOCLEBFK_00284	55.854	0	22.9937	0	0	0	0	0	0	0	0.204891	0	0	0.138283	0	0	0	0	3.30444	0	0	0	0	0	0	0	0	0	0	0	0	0	0	4.74222	0	0	0	0	0	0	0	0	0	0	0	0	0	0	0
NOCLEBFK_00285	0	0	0	0	0	0	0	0	0	0	0	0	0	0	0	0	0	0	0	0	0	0	0	0	0	0	0	0	0	0	0	0	0	0	0	0	0	0	0	0	0	0	0	0	0	0	0	0	0
NOCLEBFK_00286	65.0483	59.5369	137.221	0	56.1043	1.37426	36.6109	44.9337	242.786	0.165797	0	0.664492	0	0	1.21324	0.319956	0.372051	0	1.56004	0.269167	0	0.465777	0	5.26867	0.184869	46.0044	70.961	0	0.168993	0	0	0.274451	0.307704	0	0.147005	187.744	0.227353	134.203	0	0.272688	0	0	0	0	0	0	1.21066	0	1.28699
NOCLEBFK_00287	39.8312	0.257184	0.153971	33.4515	52.6909	1.75225	0.129071	0.112118	0.109104	0.0906	318.865	0	0	0	0	0	0.101653	52.1518	43.9028	84.133	84.7112	73.3027	0	0	51.0158	3.73243	0.197839	0	0.646421	13.0272	0	0	0	0.086091	32.2126	0	0	0.100597	0	0	0	0	0	0	0	0.217674	0	0.158287	0.140654
NOCLEBFK_00288	130.938	0	0	0	0	0	0	0	0	0	0	0.325731	0	0	0	0	0	0	0	0	0	0	0	0	0	0	0	0	0	0	0	0	0	0	0	0	0	0	0	0	0	0	0	0	0	0	0.296731	0	0
NOCLEBFK_00289	36.0952	0	0	0	25.9018	14.2092	38.4918	210.686	122.754	232.269	0	0	0	0	0	0	0	2.19921	15.1671	79.7531	17.5685	28.1767	33.3819	0	69.1548	0.186012	0	1.69185	0	0	0	0	0	23.6321	23.6841	185.996	0	105.683	0.555957	0.504978	0	0	88.7542	0.188938	28.3758	0	0	0	0.476662
NOCLEBFK_00290	2.38622	0	0	56.0202	1.34723	78.1909	4.47965	137.256	0.344241	0	111.434	0.763784	0	0.356437	0	0	0	2.60596	0.448288	0	2.43613	29.178	0	0	20.7181	1.0391	0.624217	0	2.33094	0.357418	2.22542	0	0.530525	0.271633	163.733	0	0	0	0	0.940304	0.322487	0	13.2031	1.40727	7.23372	1.3736	0.347892	0	0
NOCLEBFK_00291	181.205	76.1769	18.9782	61.0059	25.778	30.0669	6.00645	157.655	20.309	0.4558	0	1.52232	0	0	0	0.219901	0.383558	55.5017	39.3138	0	100.44	0.320122	22.3996	45.9877	52.729	0.414212	0.124414	0	0.232293	0	0	0.188626	0.211481	0.10828	6.4662	0.564081	0.156257	46.1812	0.825338	0	0	0	0	0.560972	0	0	0	0.099542	2334.45
NOCLEBFK_00292	0	0	0	0	0	0	0	0	0	0	0	0	0	0	0	0	0	0	0	0	0.249199	0	0	0	0	0	0	0	0	0	0	0	0	0	0.181488	0	0	0	0	0	0.461833	0	0	0	0	0	0	0	0
NOCLEBFK_00293	80.6148	0	0	0	0	0	3.89607	0	0	0	0	0	0	0	0	0	0	0	0	0	0	0	70.767	0.271581	0	0	0	0	0.17422	0	0	0	0	0	0	0	0	0	0	0	0	0	0	0	0	0	0	0	0
NOCLEBFK_00294	0.23719	0.120989	0	0.847368	0.160698	0	74.8066	0.105489	0.102653	73.053	2.3623	0.11388	0	0.10629	0	0	0	0	0	0	0	0.399124	0	0	0	0.826293	0.093071	0	0	0.106582	0.110603	0	0.316405	0	6.12206	0	0	0.567894	0	0.700998	18.1753	43.1433	0	0	0	0	0	0	0
NOCLEBFK_00295	0	0	0	0	0	0	0	0	0	0	0	0	0	0	0	0	0	0	0	0	0	0	0	0	0	0	0	0	0	0	0	0	0	0	0	0	0	0	0	0	0	0	0	0	0	0	0	0	0
NOCLEBFK_00296	56.2506	0	0	0.275377	0	25.4493	0	0	0	0	0	0	0	0	0.236499	0	0	0	0	0.787038	0	0	0	0	0	0	0	0	0	0	0.251607	0	0	0.184266	0	0.359973	0	0	0	0.159467	0.328145	0.115193	0.154422	0	0.106676	0	0	0	0
NOCLEBFK_00297	101.218	60.2709	0	8.01223	0	30.3569	0	172.839	161.873	0	0	0	0	0	0	0	0	61.8763	34.1502	83.2408	3.0127	44.7702	43.3921	0.157274	33.1109	3.11833	0	0.121207	12.0061	0	0	0.163851	0.367408	12.0394	59.0653	0.979986	0	118.808	0	6.02356	39.3068	0	0	0	62.0758	32.3432	15.058	0	1.07569
NOCLEBFK_00298	16.5722	21.3619	0	0	0	0	0	33.5653	0.096922	0.080484	0	0	0	0	0	0	0	0	0	0	0	0.075369	0	0	0	0.877686	0	0	0	0	0	0.133228	0	0	2.21221	0	0.110366	0.089365	0	0	0	0	0	0	0	0	0	0	0
NOCLEBFK_00299	114.551	0	61.7976	22.4996	20.8916	2.99013	48.2266	17.8927	49.3154	7.87861	0.159954	0	21.7087	0.107955	0	0.083539	0	10.035	19.2799	0.140557	1.58108	3.48624	26.3569	1.65076	2.02729	0	11.3435	2.33237	0.176494	3.13931	0.112336	0	0	0	32.9322	95.0385	0	94.3052	0	86.1495	0	0.102862	0	0	0	0	0	0	0
NOCLEBFK_00300	0	0	0	0	0	0	0	0	0	0	0	0	0	0	0	0	0	0	0	0	0	0.146471	0	0	0	0	0	0	0	0	0	0	0	0	0	0	0	0	0	0	0	0	0	0	0	0	0	0	0
NOCLEBFK_00301	140.617	8.94024	0.123043	0.308446	23.203	23.0044	36.8224	35.6596	62.6879	81.3781	0	0	0	0.090277	0	0.069859	0.162468	0.565736	27.5903	0.11754	23.5346	16.6785	11.7131	5.06161	3.71353	0.175452	5.21726	17.1993	5.09193	0.18105	0.093941	0	0	1.99514	1.60486	99.9939	0.992809	6.9135	1.13619	3.2151	22.4614	0.172036	0	0	10.2758	14.0899	0.088112	0.442721	0
NOCLEBFK_00302	4.74904	0	0	1.73123	0	0	6.94704	0	0	0	0	0	0	0	0	0	0	0	3.82363	0	11.2799	0	8.90709	0	0.543733	55.8363	0	0	0.248519	0	0.316358	0	0	0	0	0.301742	0	0	0	0	0	0	0	0.600157	0	0	0	0	0
NOCLEBFK_00303	404.923	319.699	719.456	375.252	297.335	467.345	541.178	887.044	351.525	7.38785	0.952264	0.688593	0.30338	0.214231	0.628622	0.331561	0.578318	571.02	322.516	494.542	487.789	212.536	836.866	96.3648	113.029	74.1117	76.7238	329.675	210.322	1.93339	16.4965	0.568809	0.956594	29.0605	200.628	590.039	32.5127	532.055	30.2809	94.3812	60.28	299.247	133.536	1.90309	87.5217	1343.23	1329.22	0.900516	2398.46
NOCLEBFK_00307	38.0015	131.462	0	0	0	0	0	31.02	0	0	0	0	0	0	0	0	0	0	0	0	0	0	0	0	0	0	1.35	0	0	0	0	0	0	0	0	0.139108	0	0	0	0	30.8144	0	0	0	0	0	0	0	0
NOCLEBFK_00308	281.361	0.820896	212.964	117.724	79.9568	115.854	37.0778	99.9641	53.3974	0	0	0.257555	21.4465	0.240388	0.235124	0	0	90.3862	55.3271	0	54.6875	39.5369	90.5505	70.1469	50.7316	1.40158	2.31541	0	0	0	0	0	0.357796	146.555	190.081	0	0	13.9139	0.698178	0	137.454	0	3.68459	0	29.4835	0.463191	0.9385	0	157.432
NOCLEBFK_00309	94.7474	0	0	0.337559	0.448113	0.328379	0	64.127	88.8808	0	0	0.158779	0	0	0	0	0	0	0.186385	0.192951	1.59166	0	12.4052	8.87554	0.132523	0	50.2193	45.4072	0	0	0.308421	0	0	33.8811	0	0	0	17.9473	0.143473	0	0.134081	0.706024	0	0	0.65382	0	0	0	0
NOCLEBFK_00310	0	0	0	0	0	0	0	0	0	0	0	0	0	0	0	0	0	0	0	0	0	0	0	0	0	0	0	0	0	0	0	0	0	0	0	0	0	0	0	0	0	0	0	0	0	0	0	0	0
NOCLEBFK_00311	0	0	0	0	0	0	0	0	0	0	0	0	0	0	0	0	0	0	0	0	0	0	0	0	0	0	0	0	0	0	0	0	0	0	0	0	0	0	0	0	0	0	0	0	0	0	0	0	0
NOCLEBFK_00312	178.55	45.8832	851.197	187.373	7.5851	125.16	136.383	204.147	92.3948	0.138742	0	0.185353	6.61471	0.518996	0.338421	0.133873	0.15567	16.2619	120.974	250.021	83.6118	72.7574	3.13762	20.5015	61.5715	0	0.302967	8.15487	31.8188	0	0	0.229666	0	0.659193	26.8177	184.237	0	0	0.167485	0	0	0.164837	0	0	42.1312	1.1667	0	0	0
NOCLEBFK_00313	1.3181	0	0	0	3.5721	2.61765	0	0	0	0	0	0	0	0	0	0	0	0	0	0	1.73015	1.33079	2.47217	0	1.0564	0	1.03442	0.580064	0	0	0.614639	0	0	0	0	0	3.2479	2.62989	0	0	0	0.562802	0	0	1.04238	0.569063	51.8856	5.37951	0
NOCLEBFK_00314	0	0.222003	0	2.2212	0.4423	1.72863	1.55981	0.193563	0.376717	0.156412	1.44487	0.41792	0.552381	0.585094	0.953805	0.301845	1.05298	0.203701	0.24529	0.253931	0.380851	0.439413	0.816283	0.745567	0.34881	0.379043	0	0.574592	0	0	2.63831	0	0.870861	0	0	0.19357	0.428968	0	0.188816	1.02901	0.529365	1.11499	1.49469	0	1.20463	0	0.380712	0	0.728484
NOCLEBFK_00315	31.8541	0	0	0	0	0	0	0	0	0	0	0	0	0	0	0	0	0	0	0	84.7773	0	0	0	0	0	0	0	0	0	0	0	0	0	0	0	0	1.92858	0	0	0	0	0	0	0	0	0	0	0
NOCLEBFK_00316	81.4966	31.3154	133.977	51.1204	35.999	65.4157	0	36.8839	160.66	0	0	0	0	0	0	0	0	0.840166	41.6821	0	3.61289	60.5329	33.4432	34.8511	36.83	0	29.1609	0	0.131512	0	0.167411	0	4.78917	0	55.37	0.638707	0	1.28936	0	0	30.7128	0	9.6583	0	0	0	0	0.112711	0
NOCLEBFK_00317	53.7023	0	0	0	0	7.51551	2.21437	0	0	0	0	0.34609	0.457441	0	0	0	0	0	0	0	0	0	1.80262	0	0	0	0	0.317222	0	0.647821	0	0	0	494.55	0.459391	0	0	39.6949	15.6363	721.771	0.292254	33.5483	0	0	410.15	0	0.315277	0	0
NOCLEBFK_00318	167.74	0.206424	0	0	13.7087	47.2152	142.341	44.095	198.784	0.145436	57.2319	0	1.79766	0	0	0.140332	0.16318	0	79.8267	77.9167	0	0	9.361	0	126.003	0	1.74671	0	0	0.181844	0	0	0	0	79.5632	193.665	0	0	0	0	0	0	0	0	0	23.062	0	69.4944	0.225787
NOCLEBFK_00319	58.1543	0	0	0	4.18212	0	16.3843	0	0	0	0	0	0	0	0	0.05633	0	0.076029	2.01414	0	11.3719	0	10.4603	0	1.2368	0	0	0.071487	11.2464	0	0	0	0	0	0	0	0	0	0	0	0	4.30028	0	0	0	0.070131	0	0	0
NOCLEBFK_00320	53.1977	103.395	0.352209	0	0	0	23.4723	0.512942	2.49575	0	0	0	0	0	0	0	0	0	0.487513	0.168229	0	212.026	0	0	0.115543	0	22.8542	0	6.126	0	0	0	0.192315	0	32.1573	53.7327	0	0.115058	0	0	0	0	0	0	0	0	0	0.090521	0.160873
NOCLEBFK_00321	177.673	345.985	33.8834	133.221	27.2994	68.5682	63.2357	160.765	290.138	8.91946	1.93868	0	0	0	0.255958	0	0.235476	0.546639	4.44316	58.7738	77.0355	21.0288	2.92071	55.0209	17.1999	1.65291	0.458286	3.59787	0.106958	0.131204	0	0	0	57.1357	7.9085	208.431	0.287789	7.57341	12.414	0	28.0564	61.7123	84.5667	0.258296	0.230906	0	0.127707	0	0.16291
NOCLEBFK_00322	94.5244	113.272	67.0382	74.7383	10.9921	121.456	5.34519	53.4589	128.466	0	100.043	0	0	0	0	0.097846	0.341332	37.5058	30.5329	98.1183	103.333	65.8071	0	0.483364	27.5891	39.9328	19.3756	1.49007	0	0.380372	0	0.16786	0.188198	27.655	8.18193	76.6776	0.278108	122.503	28.2773	0.667127	19.5622	0.48191	124.198	0	60.8052	0	0	0.088583	0.472289
NOCLEBFK_00323	184.249	71.3234	206.282	45.0547	21.3196	273.863	66.9232	44.455	0.123247	35.6157	0	0	0.180717	0	0	0	0	14.7947	33.5441	132.756	1.49519	15.5259	43.441	25.3677	9.12935	23.6855	33.411	1.00258	0.104317	0	0	0	0	21.1035	0.453719	59.1489	0	24.7729	0	0	129.082	0.121593	0	0	0.225205	0	0.249108	0	0.317775
NOCLEBFK_00324	32.5032	160.448	12.8076	302.068	108.152	49.713	0.268409	545.118	352.354	173.522	18.1002	0	0.332684	0	0	0	0.422786	75.3275	88.3433	0.611743	0	91.3912	97.014	0.299356	0.420157	114.6	48.1357	0	0.192038	0.706714	0	0	0.349664	111.536	0.167051	347.182	0	171.959	0	61.6647	0	0	0.300071	0	115.046	0.226332	0.229292	0.164583	0.292497
NOCLEBFK_00325	232.932	168.913	710.815	449.516	184.467	195.882	340.823	320.73	591.63	43.5344	493.857	10.0557	14.0095	2.28294	1.98485	0.785168	0	325.341	141.648	528.095	492.367	481.018	205.964	291.878	154.927	202.125	4.22017	88.6822	64.2795	2.03487	71.004	0.673498	0.377551	714.664	337.841	331.82	0.836883	138.69	2.21018	162.609	87.4395	1.45016	105.949	0.250372	2.9097	49.6098	74.5215	0.533128	0.63165
NOCLEBFK_00326	177.583	14.1839	0.882246	26.5396	59.2699	49.5739	0.184892	17.2654	0.234434	0.51913	0.359661	113.479	0.343752	47.7388	0.316566	0.187841	0	27.0431	20.0475	23.2821	45.1103	20.1138	14.7879	58.2544	0.289424	2.90921	2.26722	45.69	0.396852	2.43408	2.77851	0	0.361297	0.369974	28.1927	1.04399	0	1.29693	0.078334	0.320182	13.836	3.00675	6.09772	0.399322	6.85398	1.24726	2.60613	8.04943	0
NOCLEBFK_00327	105.448	0.61123	2.19559	16.2061	7.71248	36.7363	91.1055	1.19908	1.42614	2.79917	1.39233	11.3625	4.18232	4.83273	11.2921	0.727173	4.22786	22.4335	16.8836	2.97132	1.31072	35.1854	1.311	2.05273	1.32049	1.69585	1.05793	16.2154	2.96286	5.5191	7.12423	1.96036	1.99808	3.27371	125.241	136.434	1.32869	5.14024	1.8195	78.0879	11.2954	21.8725	0.171469	2.25254	3.4351	20.5639	5.24097	1.03452	223.802
NOCLEBFK_00328	344.343	1.69187	110.129	135.574	58.5281	46.8567	28.5601	134.371	169.776	178.692	0	0	2.29617	0.13512	0.264322	0.209122	0	27.5195	71.2045	0.175926	217.682	48.3028	12.0646	19.9727	72.0144	92.8308	14.0796	9.28861	6.29582	0	23.762	0.358759	0	127.067	0.960817	54.4477	0.148597	93.7306	0.39244	3.38632	105.379	4.5061	54.5383	1.33368	1.31149	14.8403	89.4151	14.1047	131.727
NOCLEBFK_00329	0.515459	0.262931	0	0	0	0	0	112.561	134.296	0	0	0	133.46	0	0	0	0	0	67.689	0.300745	0	0.346948	0	32.3773	0.206558	39.2807	22.6532	22.0035	0	0	0	0	0	0	0	0	0	43.1948	0	0	0	0	0	0	0	0	0	0	0
NOCLEBFK_00330	35.9332	0	0	0.23663	2.35597	0.92078	0	0	15.4511	0	0	0.445221	0.294233	0	0.406446	0	0.747842	0	28.2219	0	0.202865	0.312079	0	18.7978	0	0	0	0	1.01905	0	0.648614	0	0	2.37508	0	0.824863	0	0	0	0	5.26351	0.395941	0	0	0	0	0	0	0
NOCLEBFK_00331	0	0	0	0	0	0	0	0	0	0	0	0	0	0	0.117562	0	0	0	20.7099	0	0	0	0.167686	0	0	0	0	0	0	0	0	0	0	0	0	0	0	0	0	0	0	0	0	0	0	0	0	0	0
NOCLEBFK_00332	0	0	0	0	0.410361	0.200476	39.3838	0	0	0	0	0	0	0	0	0.070012	0	5.48075	27.3093	0	31.1831	0.679471	0	0	4.20709	0.087918	0	0	0.29583	0.181447	0	0.12011	0.403988	0.068948	0	0.179593	0.298494	0	0	0	0	0.086206	0.231127	0	0	0.958816	0	0	0
NOCLEBFK_00333	49.4165	0	0	0	0	0	0	0	0	0	0	0	0	0	0	0	0	0.16174	0	0	0.151199	0	0	0	0	0	0	0	0	0.465849	0	0	0	0	0.110116	0	0	0	51.123	0	0	0	0	0	0	0	0	0	0
NOCLEBFK_00334	148.187	125.221	380.642	188.5	96.0407	166.577	116.239	180.929	226.039	314.412	272.153	0	36.196	0	0.122549	65.2516	0	88.8554	39.0798	51.3864	8.3187	3.66976	78.3104	55.5605	182.404	118.1	70.4344	3.81436	11.3686	0	0	0	0.372975	28.072	86.2429	121.619	0.413369	55.5624	0.242599	93.2097	119.027	10.8638	88.3408	0.247338	31.3976	0.12071	0.244579	0.087778	0.467996
NOCLEBFK_00335	107.385	0.199005	0	17.9199	21.1456	24.4055	76.3029	4.42453	0	0	0	40.7405	0	10.4896	0.170999	0.067644	0	16.8903	32.652	0	7.51073	16.6748	48.7814	23.8371	0.859857	35.7614	0.688883	22.663	28.0107	0	0	0	0	0.199848	0	0.433794	0	4.90393	2.70809	67.1055	3.00533	0	0.223308	0	8.63871	0	0	18.862	15.8901
NOCLEBFK_00336	78.0076	16.9718	1.70768	26.2559	17.5222	51.5002	73.2934	2.11394	0.121006	0	0	0	0	0	0	0	0	0	13.7095	4.40455	0.734003	0	16.606	0	0	29.8295	0	18.0874	0	0	0.130378	0	0	0.190966	0	124.23	0	2.00828	0.727798	0	0	0	0	0	0.110555	0	0	0	0
NOCLEBFK_00337	59.0509	3.60829	22.1657	1.41268	0	13.5899	27.7141	60.1852	0	71.7349	0	0	48.2082	0	0.134804	0.106652	0	0.143948	2.60007	24.0456	0.269134	77.112	0.76912	15.2791	0	0	0	12.452	0.112662	0	0	0	0	0.73522	37.0453	56.3574	0.303138	1.10455	23.2168	0	0	1.3132	0	0	61.5349	0	0.134518	0.096555	0.171598
NOCLEBFK_00338	310.652	107.972	72.928	35.718	59.899	72.897	63.9128	86.2632	51.9239	0.102661	0	0.13715	0	0	0.125205	0.099058	0	91.8506	79.8535	1.83333	111.362	51.1442	8.75082	36.0488	112.295	28.6101	19.7276	18.1023	34.4264	0.128361	0.133204	0	0.190529	23.2175	134.626	12.5779	0	74.4348	0	0	25.9427	26.7113	6.70374	12.2558	39.6458	0	0.12494	0	0.318759
NOCLEBFK_00339	55.6189	36.948	0	8.69174	0	24.8309	18.7635	48.7055	15.4876	98.3936	0	0	0	0.096604	0	0	0	32.0857	1.09349	0	16.6008	32.3577	0.134776	5.90879	8.37959	0.093875	6.85181	6.26144	62.0694	0	0.100525	0	0	0	0	0.095881	0	0	0	11.5956	0	0	0	0	21.1398	0	0	0	0
NOCLEBFK_00340	0	0	0	13.2439	0	0	0	0	0	0	0	0	0	0	0	0	0	76.9224	31.2008	0	0	0	123.66	0	19.4113	0	0	94.4054	6.97096	0	0.537809	0.343063	0	0	0	168.764	0	0	0	8.86236	0	0	0	0	48.7962	0	0	0	0
NOCLEBFK_00341	112.98	228.44	176.536	53.4962	147.349	214.398	104.121	181.03	370.661	19.9633	624.292	0.150678	75.68	0.140635	0	0	0.379644	34.3713	47.4026	31.4944	0	10.7731	87.1146	34.5869	209.77	59.9945	34.2343	41.9856	11.2662	0.423067	0.146343	0	0.627968	193.343	52.7018	199.741	0.154662	49.7174	0.408458	88.299	0.381719	1.60801	42.7529	98.6953	41.1986	136.169	3.70612	0.394103	17.6851
NOCLEBFK_00342	190.442	412.964	196.894	103.08	54.8883	354.32	258.955	220.315	254.566	0.101096	349.83	165.853	8.39013	0.252114	0.246593	0.195095	0	260.424	110.979	93.3878	71.8786	113.131	182.197	65.5371	168.411	76.5597	58.5014	41.5948	65.3302	3.0337	6.95217	0.502044	0.562874	177.337	131.946	249.349	0.13863	116.741	0.366118	32.9221	47.4449	0.720661	0.322027	0.248846	33.9249	0	0.369105	0.088313	0.313899
NOCLEBFK_00343	41.1371	0	0	0.169998	0	0	0	5.03683	2.30654	0.239418	0	0.479778	0.422761	0	0.58399	0.115508	0.402944	0	0	0	0.582963	0	0	0	0	0	0	0	0	0	0.621296	0	0	1.13752	0.212282	0	0.164154	0	0	1.37821	0.810292	0	0	0	0	0	0	0	0
NOCLEBFK_00344	236.095	230.998	174.24	41.5495	40.104	190.477	124.526	117.826	46.9788	74.6087	3.60367	0	73.1905	1.5201	1.63549	0.235262	0.136784	41.2793	51.0455	121.719	43.6354	104.001	81.0121	66.0521	29.2257	4.8746	40.8633	2.3885	1.36685	0.152428	0.158179	0.201802	0.67876	113.758	48.3171	181.95	0	8.79852	0.147165	26.0658	115.114	2.31742	0.194163	0.750197	9.92556	83.0372	0	0.958454	0.378526
NOCLEBFK_00345	88.4633	38.607	53.0176	5.87373	4.09696	49.5858	6.79136	40.5148	1.35076	0	0	0	0	0	0	0	0	0	23.9668	0	2.38978	20.4824	0	23.6143	4.84647	9.68362	15.5381	0	0	0.087654	0	0	0	24.4481	0.186476	10.5846	0	24.0526	0	0	0	0	0	0	0	0	0.085318	0	0
NOCLEBFK_00346	366.632	37.9003	222.624	143.289	43.0155	67.7305	21.0475	142.743	23.3266	35.4576	71.9782	0	0.966212	0.136458	0.13347	0	0.122789	33.2079	54.4041	0	107.787	25.0054	68.5354	58.251	0.854182	0	0	4.15425	0.446186	0.4105	0.425988	0.181155	0	16.3267	0	0.135435	0.150068	123.822	15.5888	0	0.246921	0.260041	0	0	1.08366	0.262934	0.799118	0.095599	58.1056
NOCLEBFK_00347	0	0	0	0	0	0	0	0	0	0	0	0	0	0	0	0	0	0	0	0	0	0	0	0	0	0	0	0	0	0	0	0	0	0	0	0	0	0	0	0	0	0	0	0	0	0	0	0	0
NOCLEBFK_00348	89.0051	370.496	55.5945	8.72026	81.7704	0	66.6448	53.4703	113.073	0.111648	0	0	0	0	0	0.107729	0	71.1018	8.40427	10.5129	0.271853	39.2069	1.16533	46.3005	8.83887	17.5866	38.6426	74.7833	55.4206	0	0.144864	0	0	0.106092	2.17785	0.138171	0.1531	90.0006	0.269555	52.5177	0.125954	0	2.31166	0.13741	0.491355	0	0.271754	1.36543	0
NOCLEBFK_00349	95.3948	282.987	226.13	52.6763	4.90028	126.362	28.2238	141.189	20.3044	25.0101	456.612	0	56.3195	0	79.169	0	0.157649	14.0899	38.5604	34.2161	102.807	37.8938	100.458	2.00924	94.0013	22.9835	0.767047	39.2281	0.286429	0	0	0.232585	0	69.294	0.124581	76.5095	0	82.6855	0.169614	0.924366	14.1074	0.333866	100.254	0	13.4493	0	0	0	0
NOCLEBFK_00350	158.834	0.214907	0	0	0	0	0	0.187376	0	318.573	0.279737	0	0	0	0	0	0	0	0	0	7.18921	0	0	46.1911	0.16883	0	0.165318	0	0	0	0	0.25064	0	0	0	49.8439	0	0	0	0	0	0	4.34075	0	0	0	0	0	0
NOCLEBFK_00351	73.2985	0.477814	18.8798	38.9623	28.638	43.0184	57.1915	36.4527	147.464	140.38	1.24391	0	0	0.104941	0	0.081207	0	50.5281	15.706	128.435	0	48.7057	11.4197	14.5758	1.40763	30.0829	28.4859	0.824456	50.7837	0	0	0	0.156195	25.8313	8.35765	19.7894	0	51.3028	0.203192	68.5181	17.1851	43.9957	0.134042	0	12.408	0	0	0	0
NOCLEBFK_00352	110.691	0.152807	99.3505	30.8833	14.2072	113.183	52.9148	0.666159	0.907544	0	0	0	0	0.134242	0	0	0	1.26188	11.9873	99.1023	2.75251	40.7303	30.7149	33.5279	59.9025	8.08788	0	0.131833	38.5172	0	0	0	0	0.30691	0	96.9964	0	0	0	0	0	0.12791	0	0	0	0	0	0	0
NOCLEBFK_00353	133.529	0	2.30758	3.14606	0.471532	46.105	0	0	0	0	0	0.381892	0	0	0	0	0	0	3.25009	21.3477	0	29.0442	0.124319	16.8052	36.8942	0	0	30.3658	0.072842	0	0	0	0	0	78.5717	0	0	0	0	0.235076	15.3987	0	0	0	0.078627	0.1717	0	0	0
NOCLEBFK_00354	33.568	0	0	0	0	0	0	75.6839	0	0	0	0	0	0	0	0	0	0	0	0	0	0	0	0	0	0	0	0	0	0	0	0	0	0	0	0	0.176929	0	0	0	0	0	0	0	0	0	0	0	0
NOCLEBFK_00355	263.484	417.922	700.061	322.991	194.409	263.204	224.998	270.467	325.219	665.923	0.63157	0.761159	0	0.28417	0.277947	0.549753	0.383558	373.672	207.291	441.212	481.667	412.21	370.089	169.104	421.07	338.549	166.84	61.3951	117.308	1.70971	2.36562	1.13176	1.26888	74.6048	150.036	832.584	70.9405	434.862	19.2579	98.2052	150.919	9.47674	323.59	58.2008	188.434	957.532	1117.89	80.7282	1641.86
NOCLEBFK_00356	30.874	0	0	0	0.24043	22.552	0	5.83965	0	0	0	0	0	0	0	0	0	0	0	0	0	0	13.0898	0	0.142207	0	0	0	0	0	0.16548	0	0	0	0	0	0	54.6612	0	0	0	0	0	0	0	0	0	0	0
NOCLEBFK_00357	49.8407	41.938	45.2841	15.22	32.0372	23.3134	35.8517	22.3496	17.0424	0.059213	0.109397	0.079106	84.4828	0	17.2598	0.057135	0.066438	30.152	29.5294	87.3831	110.802	36.2641	101.668	37.9156	58.1018	59.4068	13.8353	30.5984	13.5194	0	0	0.098018	0.109894	31.3969	18.2706	47.6321	0	3.68184	5.71841	34.1834	22.1779	0	0	0	5.08158	0.071133	0.072063	0	0
NOCLEBFK_00358	210.204	65.3778	58.5462	34.63	84.1597	0	85.473	29.8584	125.856	40.3848	0	0	77.2345	0	0	0	0	0	20.841	102.011	30.474	0.120824	4.26458	77.2875	119.41	0.46901	0	7.26773	74.4358	0	0	0	0	0	0.228802	94.6883	0	13.7532	0.155754	0	0	0	5.95938	0	0.993704	0	0	0	0
NOCLEBFK_00359	74.8443	0	0	0	13.4666	48.4891	115.336	0	0	0	0	0	0	0	0	0	0	70.7491	0	0	0	0	41.7288	0	0	0	0	0	0	0	0	0	0	0	0	0	0	0	0	0	0	3.56242	0	0	0	0.423771	0	0	0
NOCLEBFK_00360	0	0	0	0	0	0	0	0	0	0	0	0	0	0	0	0	0	0	0.220345	0	0	0	0	0	0	0	0	0	0	0	0	0	0	0	0	0	0	0	0	0	0	0.500799	0	0	0	0	0	0	0
NOCLEBFK_00361	49.3605	0	68.325	22.0808	31.9036	0.118676	47.3623	56.5565	0	0	0	0	0.15169	0	0	0	0	63.7699	0	0	0	1.44801	0	29.2097	9.19557	12.4907	0.093794	0	0	0	0	0	0	19.1832	0	0.744193	0	0.095385	0	0	0	0	0	0	0.189032	0	0	0.075043	0.266733
NOCLEBFK_00362	33.1382	0	0	0	1.981	1.12909	0	0	0	0	0	0	0	0	0	0	0	0	2.74655	0	53.1635	0	0	0	0	0	0	0	0	35.329	0	0	0	0	0	0.144496	0	0	0	0	0	0	0	0	0	0	0	0	0
NOCLEBFK_00363	111.527	258.475	1.09424	699.027	493.316	113.707	531.869	18.7249	0.387689	0.214624	0	64.6572	0	0.267616	1.04703	0.207091	0.120405	309.419	323.62	6.09763	110.92	37.5838	176.786	431.895	35.4183	0.52011	0	126.018	129.835	1.34177	60.8473	0.355276	0	226.582	184.113	78.8865	0.735771	357.461	214.006	120.018	510.644	538.159	563.674	0.132073	177.693	4.76982	0.261201	0.187486	0.333201
NOCLEBFK_00364	51.2032	62.3219	116.113	7.50326	65.6029	31.2104	71.8981	54.5635	329.987	0.546584	254.474	0	52.4398	5.90667	0	0	0	33.6934	30.2865	31.9451	34.3812	26.6159	1.26778	79.8985	27.4257	14.791	0.994632	0.223102	14.8565	0	0	0	0	0	2.74625	46.2229	0.249839	46.3265	1.97945	0	0.822164	0	0	0	0	0	0	0	1.13142
NOCLEBFK_00365	88.491	0	0	0	5.45031	0	0	0	0	0	0	0	0.208372	0	0.143919	0	0	0.768408	48.3002	0	79.591	30.0573	0	0	0	0	0	0	0	0	0	0	0	0	0	0	0	0	0	0	0	0	0	0	0	0.425279	0	0	0
NOCLEBFK_00366	21.7099	115.355	77.7163	28.3152	0	0.898212	0	0	0	0.216728	0	0.289539	114.809	0	0	0	0	0	2.03927	0	1.31929	0.608859	0.754039	0	0	122.374	0	2.3885	0	0	0	0.358759	0.402228	0.411888	0	0	0	0	0	0	8.802	0	0	0	0	0	0	0	0
NOCLEBFK_00367	0	0	0	0	0	0	0	0	0	0	0	0	0	0	0	0	0	0	0	0	0	0	0	0	0	0	0	0	0	0	0	0	0	0	0	0	0	0	0	0	0	0	0	0	0	0	0	0	0
NOCLEBFK_00368	0	0	0	0	0	0.704751	0	0	0	0	0	0.68153	0	0	0.622174	0	0	0	0	0	0	0	0	0	0	0	0	0	0	0	0	0	0	0	0	0	0	0	0	0	0	0	0	0	0	0	1.86256	0	0
NOCLEBFK_00369	106.653	59.7165	91.0659	55.9865	13.8755	112.657	47.0222	38.514	163.47	43.3466	0.18821	0	30.0407	0.063513	0.124244	0	0	3.11778	10.5441	0.330773	53.3928	68.1137	19.9369	42.6512	13.063	0.123436	25.0818	3.80472	16.8733	0	0	0	0.283598	0.048402	9.80034	140.131	0	0.791794	8.60836	0.418876	0	0.181549	14.5214	0.062689	3.92292	0	0	0	0.237233
NOCLEBFK_00370	12.9656	0	0	0	0	0	0	0	0	0	0	0	0	0	0	0	0	0	0	0	0	0	0	0	0	0	0	0	0	0	0	0	0	0	0	0	0	0	0	0	0	0	0	0	0	0	0	0	0
NOCLEBFK_00371	0	0	0	0	0	0	0	0	0	0	0	0	0	0	0	0	0	0	0	0	0	0	0	0	0	0	0	0	0	0	0	0	0	0	0	0	0	0	0	0	0	0	0	0	0	0	0	0	0
NOCLEBFK_00372	0.187535	0	0	0.19142	0.127056	0	0	0	0	0	0	0.180079	0.952072	0	0	0	0	0	0.211388	0	0.328213	0	0	0.856695	0	0	0	0.165059	0	2.02246	0	0.223131	0	0	0.119516	0	0.73936	0	0	0	0	0	0	0	0	0	0	0	0
NOCLEBFK_00373	15.7273	0	1.79307	23.9728	0	0.416444	0	0	17.9694	0	0	0	0.266147	0	0	0	0	1.57035	0	0	0	0	2.8842	0	0	0	0	0	0	0	0	0	0	0	0	0	0	0	0	0	0	0	0	0	0	0	0	0	0
NOCLEBFK_00374	49.6823	48.6486	0	0	75.7353	3.52375	106.517	0	0	0	0	0	0	0	0	0	0	0	28.2508	0	0	0.597151	0.554654	0	0	0	4.35152	5.85641	0	0	0	0	0	0	0	0	0	0	0	0	0	0	0	0	0	0	0.194017	0	0
NOCLEBFK_00375	179.064	28.0072	205.243	76.1648	67.1267	11.5803	70.49	162.856	214.578	88.4993	0.274104	0	0	0	0	0.071579	0	116.511	30.0142	5.66033	90.1329	63.4235	28.7775	5.4219	106.041	16.6287	22.8405	4.45105	62.0775	0	2.0213	0	0	76.4826	70.7071	101.261	0.101724	0.823679	0	0.122008	23.1815	11.3694	0	0.182598	0.408089	8.73328	8.12526	0	15.7778
NOCLEBFK_00376	56.8334	6.32803	19.6053	0.158284	0.052531	0.153979	0	1.31037	0	0	0	0	0	0	0	0.053774	0	15.3867	0.087397	0	36.7742	0	0.775583	0.531295	8.51331	2.22839	0	33.2343	0.170413	0	0.506174	0	0.10343	0	3.6566	55.5895	0	0	0	45.5549	0	0	0.08876	0	0	1.07118	0	0	0
NOCLEBFK_00377	229.752	270.435	172.415	81.8459	109.768	39.9918	88.2936	55.2023	76.5362	230.537	0.243104	18.8097	25.7909	0	4.333	0	0.147639	37.0153	100.288	109.803	174.297	309.04	14.8788	60.4225	16.873	71.9068	41.9514	56.3951	83.1553	0.493578	0	0.217818	0	33.385	69.419	2.76836	0	1.46105	32.4043	0	1.48446	0.625336	0.419146	0	0	20.5495	166.386	0.114947	82.1221
NOCLEBFK_00378	205.369	0	0	1.51901	0	45.4394	0	0	0	0	0	0	0	0	0	0	0	0	0	0	0	0	0.465194	0	0	0	0	0	0	0	0	0	0	0	0	0	0	0	0	0	0	0	0	0	0	0	0	0	0
NOCLEBFK_00379	187.894	19.5114	174.743	39.8348	58.5719	216.597	0.529299	0.22989	63.3095	12.5393	0	0	0.164012	0	0	0	0	49.8376	35.8329	57.9048	0	0	23.4291	20.3663	16.7781	32.7506	0	0	0.094674	0.232272	0	0	0	0.353047	45.7074	0	0	1.03133	0.224251	0.152766	0.419143	0	0	0	0	0	0	0.324556	0
NOCLEBFK_00380	220.425	60.865	14.2316	63.052	79.4111	94.2574	81.2686	58.4928	131.708	0.112405	100.2	0.075084	0.099241	0.070079	0.205634	0	0	0.219582	8.46124	19.526	55.0813	31.736	34.5126	34.4696	1.94269	12.8026	0.184091	0.068821	0.114572	0	0	0.093034	0.31292	101.204	22.4245	7.16407	0	7.92532	15.0617	42.0587	34.1749	19.7649	2.1483	1.79844	30.7324	1.89045	0.341996	0.049096	0
NOCLEBFK_00381	214.909	136.397	81.3477	73.2935	45.7214	177.809	134.692	1.35654	239.592	44.3953	0.675067	0.122037	0.322603	0.227805	0	0.440711	0.30748	13.8	85.523	59.6171	165.373	20.7012	29.2393	24.0937	47.8725	32.0985	0.398949	0.671148	8.93847	0.228433	0.711153	0.302425	1.69534	25.954	0.242984	5.08722	425.019	38.9484	35.7283	21.184	0.206107	12.5894	150.581	0.337279	0	0.109737	0.111172	1169.92	7.51629
NOCLEBFK_00382	54.7195	0	0	5.62457	0	0	4.1991	0.79791	0	0	0	0	0	0	0	0	0	0	0	0	0	0	0	0	61.5204	0	0	0	0	0	0	0	0.170947	0	0	0	0	0	0	0	0	0	0	0	0	0	0	0	0
NOCLEBFK_00383	13.5763	0	0	17.9951	1.35137	8.43342	24.5094	0	0	0	0	0	0	0	0	0	0	21.7428	35.3929	0.52557	0.168913	0	10.4587	2.49839	5.31145	0	0	0	0	0	0	0	0	28.4771	4.3876	39.5488	0	12.3755	0	0	0	0.054946	0.441945	0	8.44658	0	0	0	0
NOCLEBFK_00384	158.24	32.799	97.3777	28.6684	29.2315	15.0718	13.9517	185.191	0.103451	0.085905	0	0	0	0	0	0.08289	0	11.7471	15.0885	0	19.9759	0.321781	0	11.7385	0	17.5911	0	0.525965	5.8666	0.107411	0.111463	0	0	0.326522	39.0744	24.771	0	11.8277	21.9848	0	0.096913	0.102063	0	0.105727	34.3093	0	0	0.075043	0
NOCLEBFK_00385	6.4587	74.1269	0	0	21.5665	32.2952	0.1181	85.251	63.0925	0	0.153156	0.110749	0	0	0	0.079989	0.744103	20.7286	0.390011	24.225	66.308	1.08681	0	0.131717	0.092435	2.00893	0	0.101511	49.9374	0	0.645371	0	0	0.078774	44.8365	0	0.113677	3.77389	0.100072	0	0.187042	0.196981	0	0.102027	0	0.597516	0.403555	1.88283	0
NOCLEBFK_00386	141.9	0.649168	42.3623	38.9706	92.9053	0	265.195	55.1855	23.9592	1.82949	0	0	0	0	0	0	0	105.43	0	0	0.835245	3.42641	1.9891	21.438	1.78495	0	0	0	0	0	0	0	0	0	0	0	0	37.8341	0	0	0	0	0	0.281453	0	0.27472	0	0.19977	0
NOCLEBFK_00387	138.943	0	0	0.553993	0	83.5337	0	14.0003	443.48	0.390111	0	0	0.688852	0	0	0	0	0	0	0	0	70.5059	0	16.7358	0	0	0	0	0	0	0	0	0	0	0	0	0	0	0	0	0	0	0	0	0	0	0	0	0
NOCLEBFK_00388	100.348	42.2683	130.833	2.39946	29.5637	110.145	1.35401	126.765	21.8736	0.105603	0	72.6568	0.372945	0.131677	0	0.407587	2.36975	0.13753	26.0007	4.2861	46.7985	17.306	1.83707	4.02701	54.7543	0	0.115301	39.6993	0	0	0.274043	0.524428	0.19599	3.21115	1.77904	0	0.144811	0	0.127481	0	0	0.752793	3.86843	0	0.232377	0.126861	0.257041	0.09225	0.327895
NOCLEBFK_00389	61.6288	297.837	3.44143	31.9921	0	0.349686	3.96671	192.96	498.387	238.444	0.935303	0	18.3256	0	0.308712	0	0.568017	62.3044	69.4675	0	165.487	154.785	59.8857	4.02189	184.869	5.52071	0.276371	0	1.54803	0	0	0	0.469778	0	0	0	0	8.15065	0	112.822	0	0	2.82204	6.54217	90.7901	0.30408	0	0	0
NOCLEBFK_00390	138.626	120.302	0	7.35055	0.304935	98.5448	1.15219	4.20362	2.14269	0	0	3.67361	1.14249	4.84058	0.591824	0	1.45191	0.210656	3.55132	0	0	0.151472	57.4026	0.771025	12.6252	0.195993	1.05965	62.9865	0.329742	1.61797	0.629631	0	0.900598	56.7169	2.86839	0.20018	0.221808	0	1.75737	0.798111	0.18248	0.576529	3.6067	0	0.355933	0.582943	2.55913	0.282601	0
NOCLEBFK_00391	62.5961	0	0.233832	31.6535	108.942	57.5936	0.392032	2.55407	72.9048	0	0	0	48.1053	0	0	0.132762	0	6.98836	33.6607	200.367	0.167511	8.37497	95.7411	40.0069	196.529	54.1826	30.3458	48.0177	0.981702	39.9122	69.9822	0	0	0.130744	52.7022	1.87305	0.188675	40.0267	0	0	0	0	3.50622	0.169339	0.151382	0	0.16745	0.120193	0
NOCLEBFK_00392	157.578	0	3.09392	40.8108	1.10315	0.898212	29.2702	0.160923	60.446	0.130037	0	0	0	0	0	0	0	0.169351	0.203927	0	0	0	21.2639	0	0	0	0	0.796166	62.8256	0	0	0	0	0	0	0	0	0	0	0.427746	0	0	0	0	0	0	0	0	0
NOCLEBFK_00393	30.0949	96.5194	439.381	12.5081	42.9768	108.259	124.558	236.274	0	70.2047	327.371	0	0.22872	0.16151	0	0	0	101.045	12.5941	0.210287	46.9934	83.3305	5.85853	66.27	53.7276	0.156947	6.36409	12.5303	163.448	0	0.168065	0	0	16.8625	0.114848	126.798	0	11.0743	0.156363	0	61.9578	0	0	0	0	0	0.157639	0.339452	0
NOCLEBFK_00394	101.463	106.795	126.374	134.698	113.601	190.54	152.549	163.732	15.2564	40.0998	18.7247	60.1943	63.4156	70.6053	66.7752	20.728	37.576	150.07	117.824	265.59	129.962	86.6563	68.9908	89.4449	51.4686	46.9862	76.4988	122.353	107.684	46.6947	20.1545	23.342	30.8727	134.622	55.481	96.9344	132.333	256.995	77.398	65.0465	44.9896	50.2595	99.6593	17.2191	124.721	1470.7	1173.26	54.565	1621.69
NOCLEBFK_00395	81.5316	3.10805	8.50619	26.6544	10.8118	166.237	40.2579	0	2.88816	0	0	0.278613	0.920636	0	0.127174	0	0	0	0.981159	0	15.7418	67.5719	0	0	0.11627	0	35.8631	0.127687	0.106285	0	0.270596	0.17261	0	0.099086	0.184912	0	0	0	0	0	0.117637	0.123887	0.166077	0	0	0	0	0.27327	0
NOCLEBFK_00396	59.1456	59.5348	0	0	0	0.652547	2.55714	0	0.113766	0	0.174537	0	0	0	0	0	0	0	0	0	0.115015	0.619267	0	0	29.0735	41.3232	0	3.00774	0	0	0	0	0	0	0	41.6215	0	22.4477	0	0	0	0	0	0	22.9709	0	0	0.082526	0
NOCLEBFK_00397	42.0867	0.550464	45.1487	0.550754	7.76827	7.36691	121.415	16.7981	1.05084	16.5797	0	0	0	0	0	0	0	0.12627	0.152051	19.2037	3.77732	38.1338	15.3487	0.462164	0	0.352443	0	0.35618	0	7.39501	11.5739	0	0	0.092133	2.32113	15.8388	0.132955	15.7178	0	0	0	0	0	0	5.54714	0	0	0.084698	0
NOCLEBFK_00398	4.04089	20.9558	0	0	0	0	0	0	0.145737	5.20385	0	0	0	0	0	0	0	0	0	2.16119	109.324	32.9784	0	3.65346	0.404823	31.3803	0.132134	0	0	0	0	0	0	0	0	0	0.165951	0	0	0	0	0	0	0	0	0	0	0	0
NOCLEBFK_00399	130.189	42.6375	68.6681	23.5106	75.6292	170.772	8.81903	240.214	59.9846	117.378	0.088657	7.75722	4171.29	0.658196	0.234103	0	0.107685	42.4971	57.7961	53.8334	48.8999	36.8038	5.25918	47.8069	17.283	45.4116	24.6778	20.8605	0.097825	4.14005	1.24529	0	0.267182	76.1059	78.2041	56.9528	0.263216	26.748	1.39029	3.3938	20.8968	7.41172	38.2909	0.236241	56.863	0.288238	27.2151	0.04192	87.2395
NOCLEBFK_00400	108.539	448.027	128.652	94.1789	21.443	82.2073	0	63.3026	396.224	327.61	0	0	0	0	0	0.124014	0.288412	113.82	32.4505	212.204	176.189	7.46207	74.0054	42.4761	74.2343	3.58181	16.699	0	119.343	0	0	0	0.477061	0	36.2384	34.5156	0	0.428121	11.6363	2.74802	0.144994	0	31.1143	0.158181	63.9162	0	31.7526	0.336821	4.58926
NOCLEBFK_00401	35.156	2.12642	12.9002	13.3325	83.2234	56.0192	72.9942	77.8683	66.3929	108.068	0.184525	0	0	0	0	0.192745	0	34.3395	12.6871	36.9699	67.7295	45.736	161.063	53.4802	36.1943	31.9492	54.525	22.5037	51.7159	0	0.129593	0	0	14.8056	52.603	42.891	0.547839	1.44169	0.241138	0	0	0.118663	0.159074	0.122924	0	1.4398	0.121553	0.087249	0
NOCLEBFK_00402	54.6669	14.5547	6.8406	79.4804	63.5054	13.6367	75.5019	35.3426	64.976	0	0	0	0	0.119499	0	0	0	0	12.1737	0	6.5339	4.84624	55.5167	7.91824	0	0	0	14.1998	0	0.119828	0	0	0	16.3922	0	39.4951	0.131418	0.532058	0	0	0	2.84654	0	0	0	0	0	0	0
NOCLEBFK_00403	3.1618	0	0	0	4.18692	0	0	0	0	0	0	0	0	0	0	0	0	0	5.18394	0	0	18.2829	0	0	1.72775	21.2783	16.0157	0	0	0	0	0	0	0	0	0	0	0	0	0	0	0	0	0	0	0	0	0	0
NOCLEBFK_00404	21.8654	0	0	0	0	8.46986	0.123021	0	0	0	0	0	0	0	0	0	0	0	0	0	0	0	0	0	0	0	0	0	0	0	0	0	0	0	39.2013	0	0	0	0	0	0	0.102594	75.7803	0	0	0	0	0.075434	0.536245
NOCLEBFK_00405	87.6792	170.447	30.6675	3.5122	0	43.2779	35.2342	0	47.1021	0	0	1.71324	0	0	0	0	0	0	52.1451	0	61.0013	0	7.17066	32.3106	0	9.2122	9.10116	0	0	0	0	0	0	74.6825	1.7868	0	0	0	4.42308	0	33.6883	1.41478	1.31302	0.112737	63.4928	0.11004	0	0	0
NOCLEBFK_00406	31.1169	0	0	11.2193	20.5575	0.153721	70.5428	0	0	0.222546	0	0.297312	0.785939	0	0	0	0.124849	6.37624	33.3298	0	0.13547	19.4855	0	69.306	5.21108	0.134827	0.485968	24.1174	100.375	0	2.59881	0.184195	0	0	0	1.37708	0	27.1814	0	0	0	0	0.531669	0	0	0.133673	0.135421	0	0
NOCLEBFK_00407	103.284	0	0.280366	35.3756	34.8324	1.36743	4.23044	24.7029	0	0	0	0	0	0	0	0	0.1851	0.644545	0	129.629	0.200847	0	43.6217	0	0	0	0.180122	0	0	0	0	0	0	1.41087	9.65406	11.6373	0	0	0	0	0	0	0.788245	0	0	47.7617	0	0	103.983
NOCLEBFK_00408	31.9521	52.5124	3.63571	59.5096	21.885	17.2978	28.8638	18.7657	43.3417	131.694	0.348742	1.51307	2.44431	0	0	0.060713	0.141196	42.8567	33.0559	64.5592	0.306415	64.8141	12.0403	35.9909	42.7269	36.519	0.137399	31.1275	3.07843	0.8654	0.244923	0.104156	0	55.9636	17.2389	38.4672	0	14.1126	0.075956	0	19.2366	0.149511	1.00213	0	13.7071	0.075587	0.076576	0.054965	0
NOCLEBFK_00409	0	0.194482	0	0	0	0	0	29.5048	0.165008	0.137022	531.868	0	0	0	0	0.132213	0	0	0	0	0	0	0	0	0	0	0	0	0	0	0	0	0	0	0	0.169574	0	0	0	0.450724	0	0	0	0	0.150757	0	0	0	0
NOCLEBFK_00410	126.491	38.1	179.936	181.395	21.4639	187.713	158.058	267.81	110.588	1.66213	256.104	4.44105	973.819	0.310877	0.30407	0	0.186492	198.389	334.425	251.627	75.0743	2.02343	130.548	66.9478	30.7652	62.8356	15.4255	32.8703	12.6215	0	0.215663	0.137569	0.154238	55.6745	117.457	113.032	0.341885	49.7372	0.100323	19.6827	89.4428	31.8921	0	0.306847	0.274309	0.199671	0.404566	0.217794	0
NOCLEBFK_00411	216.106	71.083	320.5	30.6984	78.5545	250.665	64.38	79.5287	2.23807	4.98858	0.180715	0	0	0	0.477184	0	0.10975	186.114	155.237	0	3.92984	1.19078	118.941	105.218	35.7741	37.4525	2.99035	27.3092	52.0439	8.68347	0	0.161918	0	78.913	15.0908	20.0948	0.134132	0	9.80058	0	37.8499	7.32141	1.71368	0	0.10762	0	2.61894	0	0
NOCLEBFK_00412	117.299	241.411	232.347	161.174	107.67	75.2883	131.735	192.75	43.3331	95.2941	0	86.922	8373.74	0.913018	0.510301	0.302797	0.117366	141.678	47.2442	219.749	37.059	81.3029	56.2282	98.2267	145.796	59.6974	18.9589	0.896629	0.852962	81.09	1.22152	0.173155	0.38827	52.2838	72.1577	86.3458	0.143441	51.9175	29.927	7.39785	10.6207	0.497112	0.666403	0.12874	3.22248	1.88491	0.381913	0.091377	0
NOCLEBFK_00413	51.9646	0	0	0	0	0	0	0	0	0	0	0	0	0	0	0	0	0	0.193314	0	0	0	0	0	0	0	0	0	0	0	0	0	0	0	0	0	0	0	0	0	0	0	51.0455	0	0	0	0	0	0
NOCLEBFK_00414	138.081	182.396	21.0594	29.1661	35.4738	0	70.2877	61.766	61.9014	157.192	0	8.27741	0	0	0.139935	0	0	39.7477	120.197	5.02942	7.54321	1.1819	70.8575	37.5552	0.383812	0.417078	19.4177	60.696	29.5884	0.143462	4.76399	0	0	17.4447	46.187	31.3812	0	158.74	0	0	134.36	102.103	0	0	5.42829	0	0	0	0
NOCLEBFK_00415	17.1353	0	0	0	0	0	0	0	0	0	0	0	0.743523	0	0	0	0	0	0.165084	0	0	0	0	0	0	0	0	0	0	0.131621	0	0	0	0	0	0	0	0	0	0	0	0	0	0	0	0	0	0	0
NOCLEBFK_00416	60.4308	56.5624	102.046	84.9307	75.5209	41.7644	92.1816	100.999	50.7244	1.55341	394.507	0.159638	0	0.297994	0.072867	0.115299	0	17.3516	71.5839	178.669	159.953	35.1921	36.2734	64.2683	44.3686	44.4497	46.1201	15.2907	11.8143	0.074704	0	0.098901	0	69.1504	36.9234	51.7583	0	51.9438	1.15399	111.041	91.1958	47.1334	6.18524	0	1.70912	12.2015	25.4494	0.26096	0.092756
NOCLEBFK_00417	0.340469	13.199	0	20.6776	0.115335	67.7835	0.174317	0	0	0	0	0	0.216061	0	0	0	0	0.159352	0	91.179	0.148967	91.6659	43.4226	25.8573	78.9958	0	0	0	0	0	0	0.202547	0	47.0897	0	0.151428	0	0	0	0	16.8407	49.2815	0.19488	0	0	0	0	0	0
NOCLEBFK_00418	91.2216	0.133328	75.5105	36.551	0.531261	5079.85	160.187	193.32	0	79.8456	0	10311.5	101.181	1.17129	2.06216	0.181278	0	113.528	45.667	63.746	55.2374	0.263897	74.3519	35.6717	56.5606	0.11382	12.3075	1.38032	1.24471	0.704712	0.609416	0	0.174337	134.25	170.409	134.503	0.128812	0.208603	47.7398	94.707	66.1272	51.2262	0.14961	10.1738	16.0195	1.01561	0.80025	0.082058	0.145834
NOCLEBFK_00419	193.899	282.81	173.939	128.899	176.805	80.8149	214.765	349.107	378.817	320.607	0.365745	2.38027	297.831	0	0.12072	0.382037	0.33318	121.819	170.285	99.3105	103.757	264.636	86.6121	141.232	236.743	51.8123	46.1474	89.5723	117.942	0.247526	1.28432	0	10.8385	191.69	129.628	136.831	0.271467	165.628	1.31438	85.795	131.097	56.6834	112.877	0.365469	87.015	170.04	59.6297	0.34587	259.088
NOCLEBFK_00420	93.5588	0	144.04	80.9938	0.125023	0.183235	0	9.35606	0	0	0	0	0	0	0	0	0	0	0	0	0	0	0	0	4.14107	0	0	0	0	0	0	0	0	0	0	0	0	0	0.160116	0	0	0	0	0	0	0	0	0	0
NOCLEBFK_00421	101.94	0	169.288	0	15.1238	38.2356	0.761934	18.5321	0	0	0	0	0	0	0.16307	0	0	126.767	15.5165	0	0	10.5176	12.5602	4.67382	34.4394	0	0	0	0	0	0	0	0	0.762324	5.09776	9.92829	0	0	0	0	0	0	0	0	0	0	0	0	0
NOCLEBFK_00422	41.669	3.5425	0.201984	44.2202	6.72169	12.15	70.2672	2.9416	178.048	0	0.219578	185.931	0	0	0	0	0.133352	0.773916	28.7033	190.443	0.144696	112.41	0.413505	39.0901	10.2043	0	9.08359	37.6938	0.60571	0	0	0	0.220577	0.564685	0	0	0	23.094	0.286945	0	0.134081	0	0	0	0.784584	0	0	0.103823	0
NOCLEBFK_00423	68.8342	98.505	289.179	126.96	70.8041	132.544	78.3047	78.7209	204.278	68.9505	45.7036	98.3428	64.7927	58.0353	50.9873	25.4659	59.3089	62.3776	80.0657	54.8099	77.7194	57.7381	51.2747	61.7665	50.3046	29.7011	40.802	59.9399	52.7289	71.4512	44.3906	26.0137	29.5843	52.73	97.9367	61.695	45.8831	35.6496	36.3074	27.0833	55.6462	27.1574	15.4485	20.8218	32.3467	34.1438	80.1619	22.3982	63.3863
NOCLEBFK_00424	101.524	120.403	82.8889	36.5743	51.2333	25.7952	26.2953	42.4962	45.2304	73.6697	145.027	0.071682	11.8431	0.066904	103.459	0.103546	291.801	122.985	54.8623	1.21953	50.2994	13.1644	11.2008	6.64978	52.8283	23.0149	2.16759	0.131406	29.0952	0	0	0	0.099581	56.8495	25.6902	33.5334	0.147154	17.6347	16.3872	1.23548	35.1688	34.7426	0	0.132073	28.9858	0.064457	0.1306	0.093743	0.0833
NOCLEBFK_00425	85.1196	157.545	262.718	4.8637	54.4409	213.129	3.32675	82.8414	2.99958	122.986	2.30093	2.9117	1.09958	5.82347	0.379731	0.450642	1.39738	272.488	7.08	85.9312	0.379063	23.3253	168.99	10.6363	117.865	3.0181	26.856	89.5967	160.9	1.5572	5.45384	1.0308	0.866773	4.14208	35.3364	205.955	0.426954	142.779	3.19479	181.28	148.405	322.198	127.692	59.7791	211.876	9.16379	19.8935	62.557	4.59207
NOCLEBFK_00426	0	0	0	0	0	0	0	0	0	0	0	0	0	0	0	0	0	0	0	0	0	0	0	0	0	0	0	0	0	0	0	0	0	0	0	0	0	0	0	0	0	0	0	0	0	0	0	0	0
NOCLEBFK_00427	45.4479	0	55.6356	0	0	0	0	0	5.00209	1.05603	0	0	0	0	0	0	0	0	0	0.114296	0	0.065927	0	0	0	0	0	0	0	0	0	0	0	0	0	0.087127	0	0	0	0	0.079424	0.083644	0	0	0	0	0	0	0
NOCLEBFK_00428	4.67175	0	0	0	0	0	0	0	0	0	0	0	0	0	0	0	0	0	0	0	0	0	0	0	0	0	0	0	0	0	0	0	0	0	0	0	0	0	0	0	0	0	0	0	0	0	0	0	0
NOCLEBFK_00429	63.5213	2.86108	0	30.4865	0	25.4803	55.4243	0.124728	0	0	0	0	50.8997	0.125674	0	0	0	4.85662	24.183	1.7999	0	20.8585	0	1.28114	0	43.598	1.65067	0	0	2.14234	0.130774	0	0	0.957733	73.6366	36.796	0.138209	30.8872	0	0	7.04962	0	0	0	26.7247	0.121077	0.122661	0.088044	0
NOCLEBFK_00430	224.694	0	0	0	13.4917	0	228.383	22.1414	217.471	21.9472	0	0	0	0	0	0	0	149.437	37.7852	0	61.8622	251.766	13.6948	37.146	35.6439	64.4591	20.5767	10.5163	10.942	0	49.8344	0	0	6.57391	98.9904	264.526	0.327127	0.264881	0	0	0	0.283426	0	0.293602	9.1864	0.286579	0	0	0.370356
NOCLEBFK_00431	141.348	3.35351	0	25.8008	0	26.7875	38.999	44.1609	0	0.081473	0	0	0	0	0	0	0	2.97092	0.255535	22.3534	0.09919	0	7.79514	25.6314	0.272535	42.6465	0	0.099765	0.083043	0	0	0	0	0	34.4577	0	0	62.329	0	0	0	0	0	0	0	0.097873	0.099154	0	0
NOCLEBFK_00432	125.809	270.428	545.767	71.0219	78.6912	272.482	234.755	103.795	274.92	602.487	63.5687	0.104234	0.413311	0	0.095156	0.150568	0.087542	198.039	92.1342	122.233	150.937	283.85	141.835	113.183	52.1114	27.9832	101.288	35.7319	39.5245	24.6812	9.21236	0.258306	0	52.6393	99.2024	256.746	0.10699	74.07	21.2859	96.2428	73.0566	86.3008	0	0.096025	19.4863	0.374912	0.094954	3.54415	0
NOCLEBFK_00433	10.1901	0	0	28.7454	0.753153	0	24.4737	0.494402	0	0	0	0	0	0	0	0	0	0	0	0	0.162129	0	0	7.61736	50.1894	0	0	0	0	0	60.4766	0	0	0	0.118076	28.8412	0	0	0	0	0	0	0	0	0	0	0	0	0
NOCLEBFK_00434	102.591	26.6637	93.8467	45.0008	48.4592	61.8788	66.0025	124.926	118.025	139.791	0.123513	0	0	0.08336	0.081535	0.129015	0	68.7818	64.2679	78.1452	62.3459	114.566	43.9608	50.8809	57.9953	61.4018	23.9418	25.3778	7.22309	0	0.086743	0	0	40.2761	8.4765	90.5129	0.091675	39.3423	0.080703	0.109955	3.99728	0.079428	0.106477	0.246839	5.44305	0.080311	25.1408	0	0.103789
NOCLEBFK_00435	0	0	0	0	0	0	0	0	0.31692	0	0	0	0	0	0	0	0	0	0	0	0	0	0	0	0	0	0	0	0	0	0	0	0	0	0	0	0	0	0	0	0	0	0	0	0	0	0	0	0
NOCLEBFK_00436	185.932	0	0	2.85391	0	0	0	1.2435	0	1.00483	0	0	0	0.626465	0	0	0	0	0	0	0	0	0	0	0	0	0	0	0	0	0	0	0	0.477415	0	0	0	0	0	0	0	0.596911	3.20075	0	0	0	0	0	0
NOCLEBFK_00437	0	0.713102	0	0	0	0	0	0	0	0	0	0	0	0	0	0.242391	0	0	0	0	0	0	0	0	0	0	0	0	0	0	0	0	0	0	0	0	0	0	0	0	0	0	0	0	0	0	0	0	0
NOCLEBFK_00438	31.0472	258.521	0	0	0	14.1117	0	10.113	0	0	0.290343	0	0	0	0.38333	0	0	0	5.6684	0	0.191328	0	39.3673	10.9868	99.882	0.380839	52.6769	0.384877	0	3.14393	0	0	0	10.1547	1.25407	38.8976	0	0	0.18971	17.8346	107.084	15.3104	0	37.5226	0	0	0	0.274565	142.972
NOCLEBFK_00439	140.62	28.5963	0	1.31135	0	0.115972	0.119595	42.3859	2.52734	0	0	0.112151	0	0	0	0.081002	0	0.109328	1.44814	0.136287	0.408812	45.9095	0	0	0.842442	0.101718	1.2832	1.85033	0.085566	0	16.1207	2.50132	0	0.239312	0	46.7509	0	12.3971	0.101339	0	0	0.598423	0	0	0.277087	0.504233	0.204332	0.146666	0
NOCLEBFK_00440	50.1235	26.776	155.277	20.8084	9.20781	31.1995	42.4521	20.1295	63.1896	9.63415	0.827869	5.08845	71.608	3.68768	49.6773	0.778271	2.66469	44.7018	38.3686	15.2043	51.1174	38.1014	25.4901	35.4567	38.9225	5.97248	2.25056	4.17019	16.3055	3.36166	5.52345	5.56319	0.49898	43.2616	0.71516	65.5482	1.41328	52.7399	0.270465	0.663295	34.5776	13.416	16.3433	0.772094	0.345111	4.95239	3.81741	0.352297	0.973937
NOCLEBFK_00441	6.25843	0	1.96582	33.2181	2.42293	8.87767	2.0141	0.477155	1.39298	1.15672	7.12353	0.51511	0.226947	2.24362	0.940496	0.124014	0	4.35193	3.02334	38.3928	0.156474	33.4589	7.37819	0.816848	0	0	1.12262	0.157382	0.524009	4.49959	37.6883	0.425505	0	4.64092	0.45583	0.159058	0	2.56873	0.310301	0.211386	2.60989	0.305397	0.818797	0	2.82815	0.617588	0.782083	0.561368	0
NOCLEBFK_00442	108.102	49.2271	2.13229	20.2357	0.084475	251.329	47.2399	1.21997	105.55	9.67896	0	97.4588	0	0	0	0	0	2.80116	16.7248	4.07388	56.9547	47.2491	3.89757	0	32.7768	0	0	0.109742	0	0.112055	0	0	0	27.1662	3.65526	0.110911	0	0.398037	0	0.147399	0.303312	0	0	0	0.098603	0	0	0.469729	0
NOCLEBFK_00443	0.675125	0	0	0	0	0	0	0	0	0	0	0	0	0	0	0	0	0	0	0	0	0	0	0	0	0	0	0	0	0	0	0	0	0	0	0	0	0	0	0	0	0	0	0	0	0	0	0	0
NOCLEBFK_00444	5.74917	1.00138	60.9782	1.57442	23.5606	0.139236	0	43.4052	57.167	29.1279	69.083	0	0	0	0	0	0	2.10016	17.0704	0	61.9664	23.5012	2.8053	0.960852	0	2.19822	0	0	0.308194	0	0	0	0.187054	0	0	0	0	38.3852	0	0.331536	0	0	0.160524	0	0.110891	0	0	0.088044	0
NOCLEBFK_00445	0.910531	1.85782	0.185373	4.33718	3.90698	3.4658	29.5249	5.53437	0.26271	0.763539	1.81369	3.06016	3.46692	0.544035	4.39001	2.94696	0.367156	10.7961	9.92132	103.948	0.265593	1.22573	21.0622	2.42636	39.0415	27.3584	8.45568	1.86994	4.22483	4.77342	2.40599	0	0	1.34744	63.1541	21.7334	0.897447	8.2357	0.526696	3.4086	0.984434	0.51837	0	1.87944	3.4803	1.70345	2.65497	0.952849	1.52406
NOCLEBFK_00446	78.4132	78.0172	2.8769	83.1489	16.8951	0	48.0911	69.7478	6.71528	137.119	0.183971	0	3.51666	0	0	0.096083	0	0	1.87392	0.808309	96.9854	0.093249	26.6767	18.3533	0	70.8252	0	0.975483	0	0	0	0	0	0	1.14779	0	0	0.110566	0	7.20617	0	15.4982	0	0	0	0	0	0	63.074
NOCLEBFK_00447	5.06669	0	0.814357	56.7523	28.6361	19.3297	13.7897	14.9435	0.11541	0	0.354117	0	0.169227	0	0	0	0	1.24811	92.2799	10.7356	147.946	0.089745	71.8549	17.816	57.9186	0	0.523188	49.7581	49.9164	0.119828	4.60091	0.158642	0.533591	0	0.084974	0	0	61.2931	23.8322	0	11.4604	25.9605	290.621	0.11795	45.4458	0	0.116634	0	0.148785
NOCLEBFK_00448	73.3778	0	45.9259	0	4.18385	23.4454	17.8544	48.6285	32.3858	0	0	0	0	0	0	0	0	17.1718	0	0.423885	0	0	0	0	47.6002	0	0	0.15986	0	0	0	0	0	0.496211	9.83892	0	0	0	0	0	0.147277	0.155103	0	0	0	0	0	0	0
NOCLEBFK_00449	33.3374	46.4921	61.7009	44.798	24.5636	28.3101	62.067	70.8883	81.0298	11.1338	0.149057	0	0	0	0	0.233545	0	47.5975	55.038	39.8184	1.27692	25.5365	47.4384	4.61489	51.9073	10.6556	1.49751	12.3493	0	0.100877	0	0	0	7.74319	70.2477	15.3764	0	4.21038	0.097394	0.132695	0.091018	0	0.256995	0	66.4863	0	0	0	0
NOCLEBFK_00450	96.9609	187.985	22.7707	40.245	35.1628	15.1808	28.701	66.2053	83.4624	1.92787	34.0148	10.6885	17.8721	11.6588	9.99277	6.13869	4.21802	65.0278	72.4089	2.0344	82.9701	111.028	40.9154	12.8654	69.326	17.7533	19.1548	28.9189	15.9168	12.173	12.5072	4.4678	6.26143	9.80089	8.5468	14.0766	10.3102	5.88667	3.72362	85.4528	3.37111	8.7038	4.45221	5.93179	11.7722	2.08436	5.86562	6.65221	5.98599
NOCLEBFK_00451	310.802	15.8322	235.754	102.099	34.9836	70.7445	66.5981	148.33	178.656	0	0	0	0	0	0.123674	0	0.113777	122.026	39.1203	27.8221	0.370368	17.5675	37.2212	86.5222	0.791489	0.49148	25.6865	0	36.796	0.253581	0.131574	0	0.188198	5.10703	61.0498	223.005	0.139054	119.35	53.0046	14.0097	74.4738	19.7583	0.484518	0.124803	0.223138	35.2054	83.7962	0	248.581
NOCLEBFK_00452	34.4924	0	8.42669	0	0.584222	0	43.2664	0	0	0	0	2.48408	101.783	0	0	0	0	0	0	0	35.4654	0	0	0.492399	0	0	0	51.9889	72.0194	0.387482	0	0	0	0	0	0.383523	0.424959	0.344098	0	0	0	0	0	0	0	0	0	0	0
NOCLEBFK_00453	108.386	0	0	0	0	133.011	0	0	0	0	0	0	0	0	0	0	0	0	0	0	0	0	0	0	0	0	0	0	0	0	0	0	0	0	0	0	0	0	9.16324	0	0	0	0	0	0	0	0	0	0
NOCLEBFK_00454	67.3482	10.3061	353.752	2.74975	17.5672	31.7652	0	199.486	2.33179	0	0	0	2.99173	0	0	0	0	53.9018	58.8337	3.5365	306.754	0.453311	38.7367	67.6851	2.9687	30.7938	0	0	0.49341	0.302632	0	0	0.898407	0.229996	156.662	540.369	0	14.7811	59.3129	0	54.3379	0	0	0.297888	0	0	0	0	0
NOCLEBFK_00455	82.307	70.9896	19.7984	16.6361	21.1951	110.993	41.6305	14.8597	34.6417	28.5711	0	0	39.0733	0.121727	0.079375	0.031399	0.073023	19.0707	10.1043	30.7997	30.1885	11.9149	0.679301	24.2493	31.8215	25.6685	9.66404	6.1365	30.5481	0.284812	0.591115	0.215467	0.060393	23.2223	14.5707	3.62446	22.4006	58.3169	11.2348	17.9294	10.1689	28.0683	0.051828	0.04005	17.078	81.2325	56.8699	0.056853	67.1406
NOCLEBFK_00456	53.4701	0.126859	121.669	18.6581	0.168495	0	0.763988	0.774252	0	0	0	0.119406	0.47347	0	0	2.15604	0	0.232801	0	0	0.326443	0.251093	0.155482	0.142013	0.19932	42.2362	0	0	0.182203	0	0	0	0	0	0.475488	0	0.122562	1.29013	0.107895	1.02901	0.100831	0.106189	103.347	0	0	0	0.108775	0	0
NOCLEBFK_00457	192.039	137.158	187.75	42.4577	56.4024	496.041	159.055	63.7523	140.089	1.71442	0.231762	128.597	5.09473	1.14707	0.305987	0.040348	0.234585	62.8435	40.6568	15.6816	48.8209	58.3054	40.7352	13.0222	54.4583	10.9946	11.7791	0.972869	2.08844	0.156849	1.68193	0.276873	0.310421	43.7079	46.6041	76.5885	0.17202	15.2288	0.403822	0.275095	6.79296	6.45839	37.8278	0.257318	5.84282	0.502326	19.389	31.9254	35.5747
NOCLEBFK_00458	228.676	0.169297	0.20271	83.1687	36.2028	6.42642	60.8341	0	6.32017	0	0	0.159351	0	0	0	0	0	57.1651	17.2091	0	173.243	59.5346	0	0.189521	87.5137	0	0	3.79754	0	0	0	0	0	116.744	0.105759	97.721	0	2.91369	0	0	0	0	110.184	0	0	0	0	0	0
NOCLEBFK_00459	43.4898	0	0.161471	0	0	0	0	0	0	0	0	0	0	0	0	0	0	0	0	0	0	0	0	0	0	0	0.103738	0	0	0	0	0	0	0	0	0	0	6.8573	0	0	0	0	88.2225	0	0	0	0	0	0
NOCLEBFK_00460	0	0	0	0	0	73.5352	0	0	0	0	0	0	0	0	0	0	0	0	0	0	0	0	30.36	0	153.247	0	0	0	0.889437	0	0	0	0	0	0	0	0	0	0	0	0	64.7963	0	0	0	0	0	0	0
NOCLEBFK_00461	31.2672	72.9943	9.1384	4.89495	18.6495	3.42852	0	2.21813	0.498112	0.275754	0	0	0	0	0	0	0	0.808026	12.4328	0	0.335719	0	3.11805	14.3492	0.461212	15.0356	0	0	0	0	0	0.114117	0	0	0.061125	94.53	0	0	0	0	0	0	0	0	0	0	0	0	0
NOCLEBFK_00462	130.662	0	0	0	51.0176	0	0	0	0	0	0	0	0	0	0	0	0	1.11444	0.670986	0	0	0	0	0	0	0	0.233578	0	0	0	0	0	0	0	0	0.264754	0	0	0	0	0.241345	0	0	0	0	0	146.582	0	0
NOCLEBFK_00463	252.443	25.6032	216.623	54.0587	20.2538	33.1656	107.707	118.182	35.779	1557.7	0	73.7143	0.468419	0	0.323531	0	0	83.6052	35.1529	3.01467	66.3686	63.2215	34.1489	18.9672	112.105	135.161	49.5279	70.8142	0.675972	0	0.172099	0.439121	0.492327	0.126038	20.8159	96.0264	0.181883	2.06183	0.320231	0.21815	120.755	120.552	0.21125	0	69.318	0	0	0	0.411836
NOCLEBFK_00464	89.7659	0	0	0.283671	37.2811	0	112.693	84.5427	0	0	0	0	0	0	0	0	0	0	0	0	59.5825	57.9884	0.347494	0.63478	0	80.5991	33.8055	0	0	0	0	0	0	0.189816	0	0.24721	0	0	0	0	0	0	0	0	0	0.239966	0	0	0
NOCLEBFK_00465	80.8633	0.352545	107.008	18.1656	26.2221	1.37255	44.7629	46.7219	0.299116	0.124193	0.229447	0.663663	0	0.309713	0.302931	0.119834	0.55738	17.6296	0.194762	0.604869	76.0532	0.814093	0	32.7565	5.2622	63.8041	11.3902	0.45623	1.64562	0.155283	0	0	0	0	0.770813	0	0.170302	88.8055	24.2872	0	0.280213	0.147551	0.395599	1.06994	7.78854	0.59677	0	0.108489	0.578421
NOCLEBFK_00466	15.7722	7.10664	99.3812	39.5766	8.99385	26.4934	0.134587	112.467	81.1153	54.6989	0	0	6.00538	0	0	0	0	46.2603	54.8163	27.9136	0.230029	16.3663	18.8993	32.5727	119.559	11.2179	0.103147	25.5658	46.8944	0.118121	1.47093	0	0	1.5261	3.6856	0.935314	0	44.8954	0.114042	0	1.91838	0	0	0	0	0	0	0	0
NOCLEBFK_00467	54.3372	77.6863	0	63.5412	122.539	28.0795	134.406	16.5687	42.3546	91.5006	49.8557	0.370707	0	0	0	0	0.15567	97.12	28.7204	9.00977	56.5858	38.7823	42.1166	74.7314	38.1341	3.61438	58.1698	0	15.5558	2.34191	0	0.114833	0.128747	0	29.401	179.773	0.095127	3.31212	0.083742	0	64.3301	0.329675	89.4939	0	0.228974	16.0004	0	0.0606	0
NOCLEBFK_00468	14.067	71.9087	0	0	0.307435	41.1528	0	0	145.326	0	0.20086	0	0.575925	0	0	0	0	0	0.170496	0	0	0.101809	0	4.49133	0.606129	0	0.118704	0	0	0	0.987453	0	0.60532	57.4401	0	0	0	0.120716	0.656211	0	0.122651	0	0	0	0	0	0.132313	0	0
NOCLEBFK_00469	88.8457	9.0076	137.648	25.3472	4.11261	47.4527	24.411	4.025	49.6761	0.079329	0.439682	16.6388	0.140078	0.098915	2.03174	0.612356	0.267023	0.103312	14.6798	48.8106	74.0764	1.18859	67.758	0.25209	8.66851	1.24957	0.086614	69.5522	0.080858	1.28944	0.92637	0	0	0.150763	0.844048	0	0	0.440412	11.3	1.4352	0.357976	2.82748	1.3898	0.195267	0	0.476488	0.096544	0.069298	3.07892
NOCLEBFK_00470	18.3784	0	0	3.82841	0	0	0	0	0	0	0	0	0	0	0	0	0	0	47.7736	0	0	0	0	0	0	0	0	0	0	0	0	0	0	0	0	0	0	0	0	0	35.8878	0	0	0	0	0	0	0	0
NOCLEBFK_00471	0	0	0	0	0	0	0	0	0	0	0	0	0	0	0	0	0	0	0	0	0	0	0	0	0	0	0	0	0	0	0	0	0	0	0	0	0	0	0	0	0	0	0	0	0	0	0	0	0
NOCLEBFK_00472	1.91257	0	0.141592	0	0.314129	0	0.949546	0	0	0	0	1.39132	0.073558	7.06425	0.050806	0.200977	0	0	0.587956	0	0.101433	0.312079	0	0	0.325147	0.302853	0.272899	0.408085	0.084921	0.052086	0	0.344787	0.463876	0	0.295487	0.051554	0	0	1.2069	0	0.469956	1.88072	0	0.769046	0.229165	0.200173	0.912561	0	0
NOCLEBFK_00473	0	0	0	0	0	0	0	0	0	0	0	0	0	0	0	0	0	0	0	0	0	0	0	0	0	0	0	0	0	0	0	0	0	0	0	0	0	0	0	0	0	0	0	0	0	0	0	0	0
NOCLEBFK_00474	0	0.395502	0	0	0	0	0	0	0	0	0	0	0	4.51686	0	0	0	0	0	0	0	0	0	0	0	0	0	0	0	1.39363	0	0	0	0	0	0	0	0	0	0.458299	0	0	0	0	0	0	0	0	0
NOCLEBFK_00475	0	0	0	0	0	0	0	0	0	0	0	0	0	0	0	0	0	0	0	0	0	0	0	0	0	0	0	0	0	0	0	0	0	0	0	0	0	0	0	0	0	0	0	0	0	0	0	0	0
NOCLEBFK_00476	3.81795	1.29834	0	0.974264	0.646673	0.947768	0.977377	0	0	0	0	0	0	0	0	0.220659	0	0	0	0	0	0	7.55859	2.90685	3.05991	0.83128	0	0.280031	0	1.42967	3.56067	0	0.42442	5.21535	0.405531	0.283013	0	0	0	1.50449	0	0	0	0	0	0	4.17471	0.799079	0
NOCLEBFK_00477	0	0	0	0	0	0	0	0	0	0	0	0	0	0	0	0	0	0	0	0	0	0	0	0	0	0	0	0	0	0	0	0	0	0	0	0	0	0	0	0	0	0	0	0	0	0	0	0	0
NOCLEBFK_00478	189.266	0	0.722481	0	44.4795	59.9038	12.7184	27.883	60.4099	0.425121	0	0	0.750672	0	0	0	0	0	216.673	84.8911	165.104	263.941	43.6328	0	507.206	113.839	130.429	0	0	0	0	0	0	1.2119	1.13081	1.05223	0.582957	1.41609	0	3.496	0	7.57618	717.03	0.523214	309.639	0.510698	0	0.371367	0
NOCLEBFK_00479	260.572	1150.95	718.563	380.624	233.739	455.191	289.041	644.239	1041.07	371.962	0.484287	0.875484	115.253	0.817128	0.479541	0.379394	0.735279	295.464	290.632	287.253	524.493	344.148	198.588	204.499	411.097	171.037	21.0359	73.9868	29.9245	0.163876	0	1.30174	0.729734	251.577	145.146	705.413	0.898629	152.222	34.9659	100.884	79.5485	113.517	477.817	0.645229	246.874	6.29793	90.1219	1.25942	139.788
NOCLEBFK_00480	81.5867	14.6793	0	15.7469	0.90451	0.29459	0	12.5349	19.5166	0	0	0	0	0.132947	0.130036	0	0	48.1834	84.774	1.90407	35.3077	28.5557	30.4186	82.8418	48.387	0.516766	0	21.1509	134.325	0.266627	0.138343	0	0	0.202633	0.094537	0	0	33.03	0	0.350724	2.04484	0.126676	11.7172	0	0	0	0.12976	0	0
NOCLEBFK_00481	0	0	0	0	0	0	0	0	0	0	0	0	0	0	0	0	0	0	0	0	0	0	0	0	0	0	0	0	0	0	0	0	0	0	0	0	0	0	0	0	0	0	0	0	0	0	0	0	0
NOCLEBFK_00482	55.8042	12.2918	7.74618	35.4384	83.1341	31.7985	58.9281	33.4206	187.447	15.953	59.1571	30.2941	28.3708	12.7876	61.7043	11.4349	4.21914	25.2281	18.2273	28.1191	26.7747	10.1372	24.1837	14.1222	45.2326	36.7268	35.5825	50.3719	108.829	31.9146	35.0408	22.6351	10.3626	140.98	57.3875	221.402	17.8132	12.2728	21.8715	20.6156	13.755	27.3472	2.90378	17.9511	16.4237	24.3661	26.2103	24.0891	6.3686
NOCLEBFK_00483	3.90647	8.35019	0	4.74692	16.5101	0	0	0	4.50845	0	0	0	0	0	0	0	0	77.6625	1.04842	0	1.30226	0	21.8641	0	0	0	0	5.23929	0	0.16718	0	0	0	0	0	0	0	0	0	0	0	0	0	0	0	0	0	0	0
NOCLEBFK_00484	71.7633	0	0	0	0	0	0	0	0	0	0	0	0	0	0	0	0	0	66.1836	0	0	0	0	38.8498	0	0	0	0	0	0	0	0	0	0	0	0	0	0	0	0	0	0	0	0	0	0	0	0	0
NOCLEBFK_00485	0	0	0	0	0	0	0	0	0	0	0	0	0	0	0	0	0	0	0	0	0	0	0	0	0	0	0	0	0	0	0	0	0	0	0	0	0	0	0	0	0	0	0	0	0	0	0	0	0
NOCLEBFK_00486	121.017	57.9783	34.3021	115.335	105.998	134.771	167.051	90.9915	73.4979	36.5234	176.684	48.7936	173.112	149.208	96.7075	59.3542	177.938	98.8863	150.729	42.9107	39.2	54.0032	50.16	113.009	39.6531	29.6972	59.8163	55.3162	56.331	33.0482	38.6599	43.753	41.9191	152.98	32.8098	94.5633	15.8159	20.2768	34.2276	67.184	74.2748	78.7923	43.6277	39.6278	39.6556	88.3285	107.615	40.3014	132.056
NOCLEBFK_00487	9.56774	0	0	0	0	0	29.6826	0	0.573971	0	0	0	0	0.084901	0	0	0	0	0	0	44.5978	0	22.0313	0	0	0	24.979	0	36.1583	0	0.088347	0	0	0	7.54646	0	0	0	0	0	0	0	0	0	0	0	0.165731	0	0
NOCLEBFK_00488	55.3603	0	0	0	0.284144	0	0	0	0	0	0	0	0	0	0	0	0	0	0	0	0	0	0	0	0	0	0	0	0	0	0	0	0	0	0	0	0	0	0	0	0	0	0	0	0	0	0	0	0
NOCLEBFK_00489	134.252	0	64.0565	7.62239	2.81078	0	0	0	0	0	0	0	58.1312	0	0	0	0	0	18.8926	0	63.3144	0	0	0	0	0.289054	0	0	0	0	0	0	0	0	0	0.147615	0	63.9687	0	0	0.134563	0	0	0	0	0	0	0	0
NOCLEBFK_00490	38.6971	0	0	27.1291	8.49039	0	0	85.2556	0	0	0	0	0	0	0.12072	0	0	65.6147	46.258	29.5682	0	8.89843	0.516573	0	28.0339	0.119936	1.72918	0	0	0	0	0	0	0	0	0.244997	0	8.13303	1.19489	0	0.111667	0	0	0	0	0	0	1.21054	0.30734
NOCLEBFK_00491	24.4563	323.215	31.5715	21.559	43.6829	78.9236	79.9663	9.64084	0	0	0	0	0	0	0	0	0	0	39.7842	0.972892	172.668	8.79178	0	23.4869	33.1874	0	0.2181	0	49.0691	0	0.259185	0	0	0	43.5702	9.6412	0	47.6865	0.241138	0	0	23.258	0	0	0	0.239966	0	0	0
NOCLEBFK_00492	58.905	0	0	14.6323	28.6071	20.9633	1.86824	0	5.4145	0.187341	0	0	0	0	0	0	0.210199	99.056	0	6.38701	0	0	66.8091	40.7801	0	18.8408	0	29.3637	0.190953	0.468481	0	0	0	0	168.599	0.231847	0	384.617	0	0	118.777	143.34	15.2171	45.1915	0.206119	1.57537	0	0.327306	244.31
NOCLEBFK_00493	58.7751	0.16749	0	0	0	0	0	0	0	0.118005	494.241	0	0	0	0	0	0.132403	0	3.51611	0	9.33829	0.442019	24.2232	0	0.13158	0.142984	0	0	0.12028	0	0	0	0.438013	0	0	51.4057	0	156.708	0	0	14.1114	0	4.51067	3.63085	0	0	0	0.103084	0
NOCLEBFK_00494	75.7372	95.9691	213.115	33.8983	6.31226	114.746	85.8627	31.6788	90.92	0.108011	0	0	0	0	0	0	0.242379	10.55	53.1871	104.16	173.579	158.192	83.4257	107.776	49.0175	104.831	6.01445	48.8047	139.598	0.135051	0	0	0.400918	3.59228	109.368	28.4719	0	139.119	11.7349	10.6588	42.2826	0.769957	11.1818	0	0	0	0	0	0
NOCLEBFK_00495	158.886	94.6475	40.0161	2.50568	92.85	14.289	64.4023	10.8424	0	78.4266	0.112408	0.568984	0.322307	0.151731	0.222613	0	0.068266	0.079238	30.8192	0.493884	3.18517	60.1665	1.16426	0.193346	23.7447	30.0049	0.332152	0	4.15506	0.152149	0	0.100716	0	0	14.8354	123.864	0	4.05341	0	0	0.068639	0.072287	3.29472	0	0	0.146181	0.074047	0	0.094458
NOCLEBFK_00496	341.516	450.819	405.954	174.841	111.855	43.9001	189.616	630.159	63.7802	405.742	0.283622	0.41018	0	0.19142	0.187228	0	0.516738	216.522	146.134	159.257	442.95	151.234	178.66	207.576	243.754	201.451	53.3012	180.276	96.5451	0.575841	53.7809	0.254121	0.569823	256.452	337.023	122.921	0.210512	133.808	0.555957	47.2154	711.8	1594.27	64.0595	0.377877	275.819	29.1381	185.71	0.268209	0.953324
NOCLEBFK_00497	111.92	23.6379	0	0	0.385442	0.10271	0.264798	0	0.268601	0.185871	0.137359	0.546294	0	0.046353	0	0	0	0.096826	0.23319	0	0	6.75343	0.129336	0	0	0.180173	0.081176	0	0.075782	0	0.192936	0	0	0.247271	0	0	0	0.412763	1.07701	0.550267	21.3044	0.044166	0	0.457519	0.204502	0.267945	0.904831	0	0
NOCLEBFK_00498	375.359	1211.65	3973.88	0.802661	0	53.6171	117.831	5670.11	75098.4	68.0145	17801.2	0.503403	0.665368	0	0	5.4538	4.65064	2.45366	0	4.2822	6.42253	5.46936	0.6555	17.662	5.25197	72.1387	8.02261	0	0	0.235571	0.244459	8.10877	10.8396	0	0	8.16075	9.30081	6.90346	13.1913	0	0	0	6.30148	7.65201	77.1121	0	0	8.7229	11.4074
NOCLEBFK_00499	0	0	0	0	0	0	0	0	0	0	0	0	0	0	0	0	0	0	0	0	0	0	0	0	0	0	0	0	0	0	0	0	0	0	0	0	0	0	0	0	0	0	0	0	0	0	0	0	0
NOCLEBFK_00500	20.8444	0	0	0	0	0	0	0	0	0	0	0	0	0	0	0	0	0	0	0	0	0	0	0	0	0	0	0	0	0.137743	0	0	0	0	0	0	0	0	0	0	0	0	0	0	0	0	0	0	0
NOCLEBFK_00501	225.208	247.995	214.577	189.054	241.077	161.822	249.197	145.081	129.483	144.41	185.599	251.38	257.596	182.268	155.544	102.897	110.074	201.485	202.313	148.758	126.724	184.474	175.271	138.108	156.537	189.005	133.25	163.019	117.995	184.855	143.586	165.482	137.648	222.896	221.551	212.955	154.842	183.112	149.694	142.637	190.916	191.969	203.125	118.931	178.314	185.501	159.392	107.982	213.686
NOCLEBFK_00502	24.3695	0	0	14.2363	0	0	0	0	0	0	0	0	0	0	0	0	0	0	0	0	0	0	0.958206	0	35.6227	0	0	0	0	0	0	0	0	0	0	0.272671	0	0	0	0	0	0	0	0	0	0	0	0	0
NOCLEBFK_00503	132.37	0	0	41.2417	0	0	0	0	0	0	0	0	0	0	0	0	0	0	0	0	0	0	0	0	0	0	0	0	0	0	0	0	0	0	0	0	0	0	0	0	0	0	0	0	0	0	0	0	0
NOCLEBFK_00504	65.9989	0	0	0	0	0	0	0	0	0	0	0	0	0	0	0	0	0	18.6909	0	27.1529	0	20.9387	0	0	0	0	0	0	0	0	0	0	0	0	0	0	0	0	0	0	0	0	0	0	0	0	0	0
NOCLEBFK_00507	11.2217	0	0	39.7715	59.7663	0.928557	0	184.659	18.3471	0	218.971	0	0	0	0.819757	0	0	0.291787	1.7568	0	0	0	124.332	0	0	0	5.87102	4.66403	0.228369	0	0	0	0	19.1611	1.19193	0	0	27.1163	0	0	0	0.26619	0	0	0	0	0.272672	0	0
NOCLEBFK_00508	69.8946	30.537	62.0077	21.7336	27.9107	0	44.87	0.823452	1.60262	0	0.204891	2.81502	0	0	0	0	0	75.9701	0	77.7793	0	95.4402	2.508	61.321	0	70.5476	0	0.135801	0	0.138664	0	0	0.205822	60.8058	46.1173	0	0	37.311	0	0	0	0	0.17663	0.136491	21.231	0	0	0	0.172172
NOCLEBFK_00509	107.985	76.0116	96.2498	29.1704	0	197.018	1.46318	79.3471	0	0.293446	0	0	0	0	0	0	0	0	22.7794	0	0	46.0282	0.510478	0	43.3543	32.0006	0.320395	0.718663	0	0.183454	0	0	0	0.557689	61.534	13.2553	0	0	0	0	0	0	0.233683	0	0	0	0	0.128171	0
NOCLEBFK_00510	61.3167	0	0	7.94758	0.131881	0	0	0	0	0	0	0	0	0	0	0	0	0	0	0	0	6.42	0.243392	0	0.936047	0	0	0	0	0	0	0	0	0	0	0	0	0	0	0	0	0	0	0	0	0.168078	0	0	0
NOCLEBFK_00511	50.9992	18.5685	283.859	15.5432	17.7035	0.984173	19.6525	28.0515	6.00539	141.381	126.114	0.259567	40.7122	0.080755	40.5993	29.6834	0.145333	6.83192	31.4852	16.9281	0.157696	47.9727	10.8157	48.7764	30.1857	13.0266	0	3.64806	15.7111	0	0	0.107207	0.360591	7.81581	0	14.2667	0.17762	25.7441	0	0	0	0.076946	0.103149	0.079708	0.285024	0.077802	0	0.113151	0.100546
NOCLEBFK_00512	76.9632	28.7366	34.6791	45.5424	65.0412	42.8356	44.8173	56.2263	27.1013	25.5604	28.7658	68.224	52.6878	41.2804	42.1264	27.9192	27.8144	54.6381	56.7099	37.9163	57.6439	30.5542	35.5903	54.4176	30.6338	25.9486	25.0937	37.7088	24.8344	44.3176	32.303	19.3083	25.6913	46.229	53.949	27.1607	25.6137	34.6058	18.539	36.6643	42.0845	40.1222	32.3307	20.7324	29.0871	40.6005	40.5495	35.4191	34.5259
NOCLEBFK_00513	72.7376	129.707	53.6758	111.774	44.5548	39.0809	16.937	209.786	150.327	196.163	134.433	4.40124	28.5807	6.34042	6.46363	1.79673	1.52678	10.6329	78.9568	48.8337	184.935	62.2378	56.0644	13.6553	100.38	52.154	39.4106	5.26192	4.01495	6.53697	4.46045	1.30408	1.06334	30.2164	7.23912	3.27941	0.392835	23.5384	0.345822	14.6062	9.53391	5.19042	0.912526	0.528864	3.93986	5.59231	2.26618	1.81432	1.89018
NOCLEBFK_00514	49.3232	0	0.095031	0	0.26354	1.85398	5.97469	17.9919	0	0	0	0	0	0	0	0	0	0.072824	11.7507	0	0.068078	10.9441	6.32287	0	0.374103	0	10.1348	0	0	0	0	0	0	0	0	73.9772	0.076679	97.4788	0	0	0.693918	0	54.8608	0	0	0	0	0	0.086812
NOCLEBFK_00515	0	0	0	0	0.144036	0	0	48.9777	0	0	0	0	0	0	0	0	0	80.1998	0	13.3963	0	0	0	0	0.170386	0	5.33893	0	0	0	0	0	0	0	2.3033	0	0	0	0	0	0	0	0	0	0	0	0	0	0
NOCLEBFK_00516	120.388	570.187	145.712	56.0783	74.7835	81.1839	86.6919	314.664	335.567	123.934	0.39867	0	30.2288	0.448445	0.087725	0	0.322821	35.2221	108.515	26.8583	116.907	47.8239	30.0307	52.9153	84.695	26.1465	1.41363	28.6257	76.1752	0	0.093329	0	0.266989	41.8986	66.0088	59.0184	0.295904	68.8449	8.68306	0.473211	0.081146	0.085458	176.652	0.088526	0.316556	0.086409	0.175078	0.251337	0.558346
NOCLEBFK_00517	93.5441	3.8542	55.2485	8.7444	17.6287	13.3675	24.519	54.1459	46.334	31.8208	0.847921	1.58395	2.29617	0.143068	0.932903	1.07021	2.36019	0.049809	21.8322	14.9641	6.28601	10.3506	19.9599	25.7053	15.7789	11.4001	32.9892	2.20117	20.4663	0.191283	0	0.316552	0.283926	21.4424	2.98419	95.7055	0.052446	28.1128	0.461694	31.5148	0.129441	17.6306	52.8124	0.094142	14.1388	42.1776	44.917	4.71083	0.831272
NOCLEBFK_00518	125.132	63.7942	51.408	21.7737	29.965	9.32391	25.9889	25.8741	41.4338	6.89598	0.045179	0	0.04318	0.030492	0	0.023596	0	21.2419	37.0452	5.75652	18.0415	4.16772	22.7588	7.96518	25.3036	8.47423	12.0415	6.31825	0.274177	0	2.12585	0	0.045384	17.7763	14.3102	8.01975	0	18.3278	0.05904	5.06765	19.3939	5.92685	27.9252	0.090289	10.197	12.4556	15.2375	11.514	43.2033
NOCLEBFK_00519	146.645	0	0	35.4514	0	0	0	1.40425	147.429	0	0	0	0	0	0	0	0	0	0	0	1.38149	0	30.487	0	0	0.15277	0	0	2.82726	0.157645	0	0	0	0	39.6858	0	0	0	0	0	0	0	0	0	0	0	0	0	0
NOCLEBFK_00520	45.0389	0	0.573086	16.4414	14.5154	36.1812	65.175	25.5949	8.12175	0	0	0	0.198483	0	0	0	0.126119	6.58747	0	45.074	21.622	22.4205	43.2141	2.32179	5.51474	0	0	0	0	0	0	0	0	0.106812	0	0	0.154138	2.87059	0	0	0	0	40.4597	0	0	0	0	0	0
NOCLEBFK_00521	17.6166	10.334	0	0	0	0	0	0	21.9197	0	0	0	0	0	0	0	0	0	0	0	0	26.3829	2.06506	0	0	0	0	0	0	0	0	0	0	0	0	0	0	0.087872	0	0	0	0	0	0	0	0	0	0	0
NOCLEBFK_00522	81.4948	1.43344	0.286058	4.66114	29.8279	0.348798	8.87247	32.2867	5.37156	0.084161	0	0	0	0	0.307929	0	0.472146	20.3866	1.97975	0.409899	0	0.157624	1.90328	4.27912	1.87685	0.101976	0.09189	0	0	0.736608	82.4459	0.139315	0	28.8703	27.237	0.312464	0.115408	7.28893	0	0	0	0	0	0	0.092597	5.66175	0	0.147039	0
NOCLEBFK_00523	196.654	938.502	0	70.6341	0	212.739	0	42.7742	33.8406	0	0	0	0	0	0	0	0	1.82985	130.004	0	187.824	63.4194	117.323	10.7159	0	0	0.920456	31.6577	393.553	0	0	0	0	0	17.6904	165.887	0	0	0.339228	0	0	0	0	0	0	0.33758	0	0.24548	0
NOCLEBFK_00524	1.70865	0	0	0	0	0.565541	19.2459	0	0	0	0	0	0	0	0	0	0	0	24.3957	0	0	0	0	0	0	0	0	0	0.417267	0	0	0	0	0	0	0	0	0	0	0	0	0	0	0	0	0	0	0	0
NOCLEBFK_00525	126.004	0	0	0	0	0.201801	74.7098	0	0	0	0	0	0	0	0	0	0	53.077	39.4019	0.237151	0	0	0	31.3335	18.8941	0.884989	3.50882	0	0.297785	0	0	0	0	0	0	0	0	0	0	0	0	0	0	0.179783	0	0	0	0	0
NOCLEBFK_00526	25.1638	0	0	0	53.5815	0	444.791	190.788	0.518597	0	0	0	0	0	1.57564	0	0	53.8404	28.3644	0	0	0	0	0	9.6036	134.624	0.94038	0	0	0	0	0	0	0	0	0	0.590528	90.8507	0	0	0	0.511638	0	0	47.8545	0	0	0	0
NOCLEBFK_00527	7.29086	0	0.153552	49.7839	21.4618	59.0397	0	63.1743	50.1598	1.62635	0	0	0	0	0	0	0	0.117669	25.3631	8.50773	10.01	5.83808	0	0.287121	7.15298	27.917	20.7165	43.7024	0	0	0	0	0.335373	21.0349	0	68.3203	0.123898	0	0	0	0.10193	35.2096	95.6955	0	0.099409	0	0	0	0
NOCLEBFK_00528	0	0	0	0	0	0	0	0	0	0	0	0	0	0	0	0	0	0	0	0	0	0	0	0	0	0	0	0	0	0	0	0	0	0	0	0	0	0	0	0	0	0	0	0	0	0	0	0	0
NOCLEBFK_00529	123.931	0	44.0846	30.0608	0.346006	0.169036	0	0	0	0.122359	0	0	0	0.152571	0	0	0.137288	0	0	0	0	0	0	0	23.0575	38.3994	0	0	13.4696	0	0	0	0	1.51152	0.108491	0	0	0	0	0	0	0	0.19488	0	0.134624	0	0	0	0
NOCLEBFK_00530	50.7117	2.87418	0	39.1813	0	0	0	43.2281	0	0.253125	0	0	0	0	0	0	0	0	21.4357	0	179.046	50.2518	0	0	0	0	0	0	0	40.1946	0	0	0.469778	0	0	0	0	0	0	0	0.285561	0	216.087	0	0	0	0	0	0.392973
NOCLEBFK_00531	31.1361	0	0	0	0	0	0	0	0	0	0	0	0	0	0	0	0	0	0	0	0	0	0	0	0	0	0	0	85.7505	0	0	0	0	0	0	0	0	0	0	0	0	0	0	0	0	0	0	0	0
NOCLEBFK_00532	0	0	0	0	0	0	0	0	0	0	0	0	0	0	0	0	0	0	0	0	0	0	0	0	0	0	0	0	0	0	0	0	0	0	0	0	0	0	0	0	0	0	0	0	0	0	0	0	0
NOCLEBFK_00533	0	0	0	0	0	0	0	0	0	0	0	0	0	0	0	0	0	0	0	0	0	0	0	0	0	0	0	0	0	0	0	0	0	0	0	0	0	0	0	0	0	0	0	0	0	0	0	0	0
NOCLEBFK_00534	0	0	0	2.76997	3.83037	8.30846	2.77882	0	0.195745	0.487638	0	0.651463	0	0.405359	6.1455	0.627365	0.182378	0.211689	4.58836	0	0	0	0	0.258268	0	0.984768	0	7.96166	0.662718	0	0.843623	0	0.905013	0.308916	0	0	0	0.541448	0	0	0	0	0	0	0	0	2.96732	0	0.504701
NOCLEBFK_00535	0	0	0	0	0	0	0	0	0	0	0	0	0	0	0	0	0	0	0	0	0	0	0	0	0	0	0	0	0	0	0	0	0	0	0	0	0	0	0	0	0	0	0	0	0	0	0	0	0
NOCLEBFK_00536	2.33588	0	0	0.149017	0.197822	0.724823	0	0	0	0	0	0.280376	0.370585	0	2.55958	0	0	0.13666	0.164561	0.170359	0.127754	0.098265	0.182544	0	0.234012	0	0.114572	0.25699	0	0.131204	0	0	0	0.099713	0	0	0.143894	0	0	0	0.355144	0.623357	0	0	0	0.126058	0.255414	0	0
NOCLEBFK_00537	95.0301	55.8626	32.728	20.0835	3.40354	50.2151	25.8919	18.6931	11.8129	10.7723	0	0	0	0	0.073396	0	0	27.0393	14.1565	1.17241	0.659404	31.0518	0	2.00802	7.71687	0.437516	7.29349	0.073692	0	0.150492	0	0	0	17.7276	41.9938	15.4913	0	50.049	0	40.2846	0	22.3078	0.095848	0	0.066213	0	0.07324	0	0
NOCLEBFK_00538	11.3682	73.2267	0	35.7556	1.97028	0	0.406074	17.0491	0.686509	0	0.175537	0.253865	255.852	0	0.115878	0	0	0	6.85405	0	0	24.0229	0.165284	0	21.2944	0	19.5028	0	0.096844	0	0	0	0.35267	0	0.084244	0	0	0.105497	0	0	0.107188	0	0	0.233872	0.522681	0	0	0.082999	0
NOCLEBFK_00539	3.51016	255.786	206.425	77.2881	41.1082	6368.42	6652.1	19.6256	209.209	3.24386	2.66358	16348.9	26289.4	7750.25	10432.5	11369.2	10517.7	4.69397	97.22	2.92573	257.579	4.38776	126.654	4.00877	60.6854	37.1215	1.96764	1.32406	1.4695	3.60526	0.46766	2.98316	2.00677	113.708	417.366	552.66	4.44822	210.105	1.30529	21.9336	3.65952	4.28219	4.01834	3.10516	6.34489	3.46386	4.82511	3.14854	3.91692
NOCLEBFK_00540	85.8794	0	0	0	0	0	0.242256	0	0	0	0	0	0	0	0	0	0	0	0	0	0	0	0.295815	0.270188	0	0	0	0	0	0	0	0	0	0	0	0	0	0	0	0	0	0	0	0	0	0	0	0	0
NOCLEBFK_00541	133.838	0.258597	0	0	26.1897	0	36.0788	0	0	0	0	0	0	0	0.111103	0	0	0	8.4288	0	4.99082	0.341229	23.6124	0.144744	0	0.110381	0	52.5404	0	0	0	0	0	0	0	91.0929	0	27.8161	0	0	0	0	0	0	0.100228	0.109435	0	0	0
NOCLEBFK_00542	15.5176	0	0	0	0	0	0	0	0	0	0	0	0	0	0	0	0	0	0	0	0	0	0	0.47897	0	0	0	0	0	0	5.08474	0	0	0.572898	0.534564	0.373063	0	0	0	0	0.340077	0	0	0	0.331665	0	0.366868	0	0
NOCLEBFK_00543	33.1254	70.9828	114	108.537	66.2009	246.917	144.508	84.358	0.392773	4.13134	0.20086	0	46.266	0.135563	0.132595	0.209807	0.121984	82.1214	78.0874	178.621	105.624	232.838	150.168	102.61	156.624	2.89812	20.8918	62.3046	75.2434	0.407808	0	0	0.201773	105.582	56.6813	252.411	0	0.845013	0.131242	87.0814	89.4124	126.455	110.3	0.133806	46.7702	0.391814	0.529252	0.189945	1.01271
NOCLEBFK_00544	83.4704	65.1128	32.2361	40.4051	42.447	57.1639	66.8565	66.2478	88.3241	0.070253	0	0	0.248103	0	0.085681	0.067787	0.078824	19.3049	49.5776	111.088	160.112	27.5651	28.4754	27.1247	7.83345	89.976	29.0711	24.4315	0.930894	0	0	0.116293	0.130383	82.8457	12.8941	48.9487	0.096336	0.078005	11.7882	0.231092	0	0.083466	0.111891	0.086463	0	0.084395	0.085499	0.06137	0.109067
NOCLEBFK_00545	284.282	0	0.380767	0	0	0	1.27675	151.664	0	0	0	0	0	0	0	0	0	76.4483	54.1096	0	0	0	0.389757	0.355991	0	181.346	0.244626	0	0	0	0	0	9.9796	0	0	17.4684	0	0.248773	0	0	0	0	0	0	0	0	0.545344	0	0
NOCLEBFK_00546	51.0304	0.788794	0	80.7623	0	172.487	0.26391	11.0039	26.9931	0.185248	0	0	0	0	0	0	0	0	12.7825	0	0	0	0	0	0	9.2029	0	0	0	0	0	0	0	0	0	0	0	0	0	0	0.208986	0	0	0	0	0	0	0	0
NOCLEBFK_00547	160.079	18.6101	55.3847	5.66692	0.716466	32.0268	0.541432	0.823059	5.49207	12.0666	0	0	0.167772	2.84332	1.50641	0	0	50.8563	16.3901	0	3.12319	3.381	23.9661	3.92509	0.105942	0	0	16.172	0.096844	0	0.12328	0	0	46.3161	66.1312	0.587922	0.130288	38.9284	0	2.81283	45.9835	34.0907	48.424	0	1.25443	0.114139	0	0.497993	0
NOCLEBFK_00548	94.0574	153.276	27.0833	32.7518	32.6554	78.9005	22.9854	35.0332	7.03279	81.6613	0	0	0	0	0	0.095509	0	0.515636	10.7107	44.513	86.6452	41.526	27.7228	53.3158	0.331109	38.4994	19.0209	1.45449	0	0.123763	0	0	0	0	10.0051	127.521	0	0.109906	8.12527	0.162799	0	4.23362	0.157649	0	0	0.118909	0	0	0.15367
NOCLEBFK_00549	55.4318	0	146.563	230.884	0.121147	74.9276	44.4934	0	0	0	0.237451	0.171703	0.226947	0	0	0	0	22.9313	5.84512	35.2629	0	0	0.670744	1.22527	1.00317	1.24585	0	65.156	0.524009	0	0	0	0	232.168	1.25353	1.27246	0	0	24.9793	0	8.40966	0.610793	0	0	0.282815	0	0	0	0
NOCLEBFK_00550	203.526	99.7838	85.5757	88.4799	156.749	194.283	192.382	81.4545	122.688	26.5685	12.6096	11.3097	500.23	12.0534	7.18084	8.22502	21.7578	101.018	72.7652	78.4674	89.87	55.0265	76.2326	54.2226	157.335	47.0642	38.3794	53.2306	106.979	10.2186	9.76799	3.78218	5.98012	117.158	71.0611	126.591	4.65954	123.888	71.3943	123.962	72.4046	62.2612	117.802	4.9391	220.381	12.633	10.6593	20.5735	11.3691
NOCLEBFK_00551	166.447	0.467143	221.359	217.453	81.9787	209.038	58.4931	67.1025	227.503	125.397	0.152016	0.219849	0.290583	0	0.200701	0.079394	0	133.626	50.9691	187.549	252.238	157.108	119.376	77.0037	242.853	120.536	113.106	123.526	64.7457	50.2053	3.95016	0	0.152707	14.3864	92.5803	151.419	0.338491	69.9824	0.099327	42.0873	85.956	44.284	8.78023	0.202535	32.2283	0.296534	0.100138	0.143755	0.510963
NOCLEBFK_00552	397.902	2.35324	0	0	0	0	131.681	0	0	5.3884	0	0	0	0	0	0	0	0	0	0	0	0	0	0	0	0	0	0	0	0	0	0	0	0.393868	0	3.59073	0	0	0	0	124.851	0	0	0	0	0	0	0	0
NOCLEBFK_00553	0	0	0	0	0	0	0	0	0	0	0	0	0	0	0	0	0	0	0	0	0	0	0	0	0	0	0	0	0	0	0	0	0	0	0	0	0	0	0	0	0	0	0	0	0	0	0	0	0
NOCLEBFK_00554	116.049	1.32577	43.4954	16.5808	0.264134	0	0.26614	10.5189	0	0	0	0	0	0	2.9619	0	0	0	0.585931	23.9596	0	0.08747	3.2498	20.6294	17.6016	0	0.611909	0.114379	0.571244	0	0.121196	0	0	17.9293	25.0944	29.3616	0	0	0	0.460881	0	0.4439	0	0	0	0.11221	0	0	0
NOCLEBFK_00555	38.1385	107.136	58.0692	29.1138	46.7008	0	0	59.0064	128.867	0	76.1834	0.207492	0	0	0.09471	0.224793	0	40.0493	37.9963	0	136.332	8.14474	36.2045	0.370164	44.5072	1.41142	5.34166	9.03378	6.4906	0.097097	0.100761	0	0.288248	0	51.0214	48.5331	0	19.5733	10.1244	0	0.438038	0.184525	0	0	0.598084	0	0	0.067837	0.120561
NOCLEBFK_00556	155.701	47.2867	64.8597	8.66268	13.8587	2.80903	98.6021	49.2618	47.5605	66.2406	0	0.10448	0	0.097516	4.19674	0	0.087748	44.8141	39.1237	25.1392	4.66542	1.90412	55.7793	0.869828	20.5798	0	6.48951	2.96872	1.35513	0	0.101473	0	0.145144	16.2749	46.5978	69.2014	0	4.51547	0.188816	0	24.3508	0	0	0.096252	47.1527	0	0	0	0.121414
NOCLEBFK_00557	24.3236	63.3563	0	0.226391	0.200358	0.220235	3.55813	0	0	0.478261	0	0.283971	0.187668	0	0.06481	0.256375	0	2.21459	11.5003	0	0	0.099525	0.277327	0.084434	0.296265	0	0	0.130143	0	0.066443	0	0	0.098623	37.064	34.3483	0	0	0	20.6559	25.4334	13.2488	27.4005	0.253906	0	50.5736	0.063837	0.905411	0.046421	0
NOCLEBFK_00558	118.298	0	0.314824	44.1957	17.636	69.353	6.99362	43.4425	75.8484	0.092624	1.19787	0	0.163554	0	0	0	0	57.4185	52.5824	0.150373	82.4318	48.2257	16.5962	14.5698	36.2509	7.51944	12.9447	0	48.5265	0	0	0	0.171902	24.9083	47.8793	48.717	0	10.3873	0.223625	21.3276	29.7805	0.110045	0	0	0.509541	0.445077	0.450899	0	0.143798
NOCLEBFK_00559	356.585	158.913	136.84	73.1271	44.7143	57.4496	79.363	110.458	52.6162	0.078022	19.6039	0	0	0	0	0	0.087542	47.9602	27.1631	0.253333	72.8563	31.5633	4.61472	2.47938	5.21984	1.70168	4.60011	2.00634	5.96446	0	0.101235	0.38746	0.434406	23.873	9.68504	22.9807	0.10699	82.0401	9.98367	14.2439	0	0.278091	0.124265	0	0.944269	0.187456	0	0.068157	0
NOCLEBFK_00560	238.037	5.86429	73.6376	27.6067	32.0048	24.5143	21.507	37.9544	14.2887	73.5758	0.293589	0.283064	20.8581	0	0.064603	0.102222	0	84.8514	12.4604	0	48.3668	0.892864	8.29323	8.83723	0.059064	17.8429	0.462679	8.56197	13.6058	0.397385	0	0.526103	0.098308	40.62	50.7238	84.2371	67.1164	51.1106	84.8536	20.5605	21.8714	1.82506	85.4616	0.195578	9.44132	276.105	110.494	0.138818	550.732
NOCLEBFK_00561	134.249	38.8545	5.51012	30.3465	23.1641	20.105	24.5123	12.493	3.4164	0.036844	65.5507	0.098443	0.065058	0.137822	0.539218	0.071101	0.041339	16.602	7.62687	0	62.7532	3.51921	24.2273	11.7667	19.0621	30.4464	2.09182	8.57206	10.778	0.138202	0.047805	0.243956	0	15.4746	39.4627	4.10369	0	0.940916	0	0.666571	19.4524	20.7049	0.05868	0	0.283758	2.08024	0.089679	0.06437	0
NOCLEBFK_00562	120.958	59.2882	135.109	53.5788	105.364	148.838	143.806	165.809	134.541	0.410099	150.775	0	0.206899	0	0.071451	0.056529	0.131467	121.39	77.1752	30.2456	106.203	77.7393	36.6895	64.7879	116.67	39.0427	52.7078	37.6632	14.2718	0	21.8925	47.5197	0.217459	42.1424	26.6479	184.666	0.080337	0.1301	6.71863	0	0.132185	23.5263	1.21301	0.072104	33.7759	26.6032	0.071299	0.051178	2.09192
NOCLEBFK_00563	129.513	2.15893	0	0	0	0.420264	18.4192	4.14118	4.02983	0	0.28102	0.203209	1.07436	0.758654	0.185511	0	0	4.95235	35.0652	155.08	0	62.1037	2.11684	0	37.1435	0	0.332152	0	0	0	0	0	0.564595	0.144539	0.134867	0.188243	0	0	0.183619	0	0	0	0	0	0	0	0	0	0.236145
NOCLEBFK_00564	194.648	0.10529	14.7502	61.4164	15.1035	52.9824	1.05682	55.081	65.8386	71.8083	0.274104	0	159.022	0.092498	0.090473	0.143157	0	0.289829	19.8932	11.5615	2.43847	34.7336	34.5846	61.1732	1.48888	0	0.161989	0.181675	0.151224	2.31882	0	2.57873	0.137675	0.493436	35.3207	0.091805	0.610344	50.4091	2.1492	0	48.2042	0.616942	0	0.182598	1.95883	15.6843	0.180561	5.44339	1.0365
NOCLEBFK_00565	35.2293	0	2.04922	0	0	68.2968	0.858907	0	0.363018	0	0	0	0.532295	0	0	0	0	0	0.94548	0.489394	0.367002	0	0	0	0	0	0	0	0	0	0	0	0	0	0	0	0	0	0	0	0	0	0	0	0	0	0	0	0
NOCLEBFK_00566	12.5586	0	0	0	0.868218	51.4077	94.7422	30.5486	116.69	0	0	0	0	0	0	0.355507	0.206695	0	0	136.976	26.2406	0	4.48653	19.6112	67.58	51.7856	0	0	0	0	0	0	0	0.175052	14.3738	0.227983	0	0	0	1.21195	0	0	0	0.226726	45.8066	0	0	0	0
NOCLEBFK_00567	235.618	0	1.69302	0	14.2194	1.17963	6.89338	0	20.3944	0	0	0	97.7549	0.177453	0.173568	0	0	0	0.446364	12.9385	0	70.3664	2.22814	11.08	45.0669	0.17244	29.8338	0	0	49.4679	0	0	0	0	0	65.6943	0	0.948114	0	0	0	0.169082	6.11989	0	51.0451	0	0	0	0
NOCLEBFK_00568	79.9457	0	0	0	52.4166	0	120.3	0	0.248025	0	0	0	0	0	0	0	0	3.21872	0	0	0	134.044	0	10.1446	75.7849	0	0	0	0	0	0	0	0	0.587132	46.5668	140.443	0	0	0	0	0	1.22348	0	0	0	0	0	0	0
NOCLEBFK_00569	206.832	199.397	168.309	62.6289	45.4252	63.6742	50.5467	183.838	320.387	295.34	11.844	0.147665	187.953	0.137822	0	0.106652	0.124017	66.2162	49.228	513.032	64.996	41.92	26.3424	17.5622	71.2363	2.94643	0.362046	1.21813	11.0409	0	0	0.182967	0	81.1893	63.7022	154.025	0.303138	182.251	4.53661	0.181792	0.374085	37.9516	22.7093	0.408107	65.0616	0.663907	70.6221	0.289666	162.504
NOCLEBFK_00570	72.0301	0	0	0	23.8195	0	0	0.152548	0.296892	0	0.910964	0	1.08834	0	0.300679	0	0	0	0	0	0	0	0.214439	0	0	0	0	0	0	4.46972	0	0.408105	0	0.351406	0.218595	3.66129	0	2.18994	0	20.8824	0.139065	0.146454	0	0	0	0	0	0	0
NOCLEBFK_00571	141.711	0	39.1344	0	8.82688	0.106039	0	0.094989	0.18487	0	0	0.102545	33.2068	0.09571	0	0	0	20.7925	0.361121	0	0	0	10.8157	0	0.342351	0	0	0.093992	0	0	0	0	0	0	0	1.04492	0	12.8694	0	0	0	0	0	0	0	0	0	0	0
NOCLEBFK_00572	73.9033	0	144.075	0	26.704	0.296497	0.15288	31.6065	71.9809	0	0	0.430092	0	0	0	0	0	0.698778	6.56328	0	77.7354	34.971	0	0	0.119657	0	0.117167	0	0	0.268353	0.278477	0	0	0	0	0	0	0.119154	0	0	0	0	0	0	0	0	0	0	0
NOCLEBFK_00573	0	0	0	0	0.947147	0	0	376.779	0	0	0	0	0	0	0	0	0	0	116.609	1.63131	11.01	0	0	0	0	0	0	0	0	0	0	0	0	1.90966	0	0	0	0	0	0	0	0	0	0	0	0	0	0	0
NOCLEBFK_00574	153.412	27.2676	0	38.12	57.7985	303.211	71.6097	124.409	0.31692	0	0	0.351583	0	0.328148	0.320963	0	0	0.342734	0	0.427249	3.84478	35.2414	65.9246	263.434	0.293443	0.956631	0.287338	0.322258	0	0.329052	0	0	0.976839	204.311	84.2362	366.401	0.360878	22.2079	0	0.432838	1.78136	0	0	0	0	3.16146	1.28113	0	212.864
NOCLEBFK_00575	174.264	302.228	174.305	147.455	147.952	290.067	219.993	267.329	161.987	84.7743	45.1642	0.242515	77.1439	0.679051	0.147596	0.175158	0.135785	55.3991	139.398	16.0125	109.029	148.799	97.5786	63.3587	35.8943	168.046	7.26735	21.1914	97.5719	10.2895	0.157025	133.119	16.8451	190.954	61.109	199.044	0.165951	85.3946	8.6924	12.5397	18.2947	8.555	53.5834	0.148944	34.3527	15.7012	62.227	4.44014	222.264
NOCLEBFK_00576	462.419	90.339	322.803	196.575	196.345	44.8865	78.6275	248.966	233.16	101.481	1.02789	0.594624	124.571	1.38747	5.02124	0.429471	0.249699	226.646	55.6659	169.268	208.082	105.139	24.777	59.4052	31.2665	32.8978	21.0181	67.3108	2.60862	3.06084	25.2662	263.03	0.413026	92.202	74.6864	151.479	0.915516	4.57142	69.5804	97.9115	4.26808	16.5252	0.708892	0	73.5784	1.33673	1.21879	0.486017	88.1025
NOCLEBFK_00577	297.946	107.661	0	78.8748	50.921	416.669	87.197	107.889	229.941	424.441	0.25526	0.184581	0	0	0	0.133315	0	2.69903	31.6342	266.475	18.6712	95.2256	15.8631	1.75622	165.766	22.433	29.5671	19.2871	61.8233	0.172752	0	0.457418	0.512841	56.8482	140.39	97.4627	0.378922	70.5687	0	0	4.36432	0.164151	0	0	0.152013	0.49793	0	1.32764	0
NOCLEBFK_00578	450.276	41.4234	192.798	114.821	108.753	62.9087	222.61	166.249	3.28208	154.441	0	1.5171	158.011	0.566393	1.24648	0.109574	0.127415	866.944	2209.17	69.1353	107.562	79.4374	1040.88	2836.78	56.2205	60.1302	37.9404	931.539	2270.53	39.8987	245.329	0.37596	0	140.174	117.503	241.303	0	181.318	0	58.0863	140.282	209.123	179.237	0.279525	174.419	11.3228	12.0237	0.099201	0
NOCLEBFK_00579	128.077	391.877	132.542	29.0879	21.493	26.9087	23.675	41.7049	171.642	0	0	0.103262	32.6201	0	0.094269	0	0	92.8115	49.4559	164.637	43.7579	36.8424	52.44	15.106	0	43.7375	0	2.46088	125.898	0.096645	2.70785	0.127949	0.143452	89.5337	79.088	62.6554	0	71.2338	0.37323	0	0.087199	6.79561	7.87878	0	1.02051	0	0	0.067521	0.479995
NOCLEBFK_00580	150.35	0.154311	341.262	2.93344	32.1782	47.7613	50.9571	37.6718	13.0924	0.108719	0	0.145244	42.2345	0	0.795567	0.209807	0.121984	88.9176	60.0147	115.256	1.19125	1.83257	34.4213	71.5157	116.862	80.884	27.7767	13.1798	67.708	1.22342	0	0.179968	0	208.065	30.1722	49.6479	0	141.117	0	67.2333	50.1642	5.81255	9.00409	0	3.58851	0	0	0.094972	0
NOCLEBFK_00581	106.172	184.547	194.142	75.3431	23.4199	136.007	80.5074	227.486	385.934	74.4452	0.17257	0.623936	0	0.116469	0	0.180257	0	1.5814	81.7374	0.303287	87.9046	5.68555	41.11	100.921	74.7809	33.2746	0.20397	8.00652	2.5706	2.91975	22.7849	1.23696	0.346709	4.70422	4.96918	181.372	0.128086	102.884	0.112757	0.153627	0	0	15.0255	0.11496	5.65232	0	0.113677	0.244788	0
NOCLEBFK_00582	28.7125	0.263299	0	11.2619	4.15287	8.39294	6.01235	0.229568	0.111698	0.046377	0	0	0	0	0	0	0	0.060398	1.81823	8.43264	0.112924	0.738295	6.61551	0	0	0	0	0.056789	0	0	0.060174	0	0	0	0	0	0	0	0	0.076276	0	0	0	0	2.90845	0.055712	0	0	0
NOCLEBFK_00583	25.528	12.3793	0.27967	6.54345	0	0	12.4254	24.2343	47.2644	0	0	0	0	0	2.30807	0	0	15.7522	0	0.133582	0	0	0	0	0.733972	0	0.089838	0	0	0	0	0	0	0	0	0	0	9.22745	0	0	0	0	0	0	0	0	0	0	0
NOCLEBFK_00584	225.265	90.4194	4.44228	32.7717	34.7757	94.1969	22.8752	107.672	138.503	78.0441	5.24317	0	72.1355	0.372492	0	0.072062	0	0.972624	31.9738	70.4441	18.6394	13.0781	27.5428	0.118664	86.3556	1.62886	0.570793	40.2387	0.228369	0.09338	0.096903	0	0.138606	41.2319	26.2225	121.817	0.307234	28.8577	0.090155	0	19.7153	3.63793	6.77997	0.091916	0	1.88406	0	0.13048	0.579724
NOCLEBFK_00585	530.955	27.811	110.316	152.399	113.752	89.813	117.241	78.5889	31.3405	26.0251	330.817	73.027	12.5976	5.76347	3.18629	1.06652	1.24017	82.0506	86.8266	1056.93	161.603	77.065	75.3388	49.4936	382.287	243.628	0.877688	100.527	13.3146	3.89478	4.69361	63.5395	1.4919	6.49285	93.5487	149.847	2.89359	133.662	32.5083	2.97478	101.23	4.89467	183.563	1.36036	2.98498	2.2935	4.03555	1.75555	3.27597
NOCLEBFK_00586	229.052	0	464.468	51.8884	42.6035	50.4772	99.2941	20.5177	0	32.9482	0.195103	174.517	0.372945	0.131677	0	0	0	154.034	36.4341	137.841	8.22831	51.6212	30.3117	1.34234	37.7981	0	1.15301	24.6989	0.107639	0.13204	0	0.174809	0	0	95.0383	114.093	0.144811	28.0242	0.509922	0	23.8271	0.125465	0	0.12997	0	0.253722	0	0.09225	0.327895
NOCLEBFK_00587	119.222	117.397	81.4698	1.05819	14.0476	4.97549	28.1316	221.929	10.0204	0.124193	0	0	0	0	0	0	0	52.7272	77.5152	0	86.9395	51.9856	3.02463	0	0	25.5818	1.35598	36.6505	0	0	0	0	0	0	25.6571	64.5525	0	0	3.5981	0	0	3.54123	0	0	0	0	0	0.108489	0
NOCLEBFK_00588	27.7074	22.6969	82.6962	32.4611	2.0344	13.824	2.79526	39.4571	73.1298	0	0	0	0	0	0	0	0.110074	45.101	7.69252	82.1835	16.3631	45.7509	18.4316	34.6049	0.10939	0.237743	18.4236	0	40.4983	0.122664	0.127292	0	0	72.9937	0	0	0.269057	22.0039	0	12.2629	34.8629	23.8941	0.3125	0	0.215877	0	0	0.0857	0
NOCLEBFK_00589	154.209	0	0	59.6027	40.2173	2.08222	65.5743	99.1449	80.9809	0	0	83.4875	0.204729	0	0.141403	0	0	32.7659	64.0017	0.188229	129.015	0.217146	40.3385	2.02641	18.7455	0	0.12659	44.7217	0	0.144967	0	0	0	45.8319	45.7463	0	0	29.0943	0.139961	0	0	52.4823	0	0	0.637817	0	0.141103	0	0
NOCLEBFK_00590	1622.09	206.404	296.478	236.771	99.0396	740.668	229.939	136.455	356.02	173.388	0	0.889548	18.812	0	0	0	0.298836	198.059	259.798	141.177	287.131	94.4026	240.929	180.489	169.872	64.5438	8.1424	68.9787	57.8241	0.166508	0.17279	0	0	143.627	43.4521	255.945	0.182613	29.1294	0.160759	69.2124	7.66198	24.6819	4.87826	0.491695	66.959	0.159978	0.16207	0.116332	0.206745
NOCLEBFK_00591	41.0453	0.86516	83.08	119.974	131.803	106.943	196.775	104.701	107.023	0	0	0.162866	20.4503	0	0	0	0	172.897	128.092	169.615	311.088	33.7917	75.2861	39.1276	56.9561	71.4941	0.133105	0.298562	34.1714	0	0	0	0.226253	3.12777	46.3714	204.279	0.167171	92.5875	34.1423	1.20304	36.9959	16.2219	0.388327	0	9.12078	7.46896	62.7587	0	3.21747
NOCLEBFK_00592	76.0459	0	0	0	0.201651	0	45.8684	0	94.6774	0.106966	0	0	0	0	0	0.103212	0	0	18.7876	0	15.8876	0.500836	0	1.86953	41.3869	0	0.116789	0.261964	0	0	0	0	0	0	53.9651	0.132377	0	0	0	78.8156	78.3165	4.44795	1.87399	0.131647	0	99.8431	0	0	0
NOCLEBFK_00593	140.035	0.098051	2.46547	2.35447	35.3582	109.464	27.4582	14.3624	0	0	0.12763	51.9596	0.121984	0.086139	0.084253	0.066658	0.077511	181.375	270.299	98.2459	35.9967	1.16444	197.448	600.738	19.1802	0	0.075426	66.3206	286.725	2.67766	50.823	0.114354	0	1.50983	0.061252	4.44567	0	0.920461	0.083394	0.11362	0	0.164151	34.108	0	30.2506	0.165977	0.084074	0.060347	0
NOCLEBFK_00594	149.894	0.080867	21.5925	5.90641	71.6414	10.4683	9.82135	0.28203	1.37223	0.11395	0	0	43.361	0.213127	0	0	0.063926	33.6869	41.8156	71.4078	0.346823	7.3628	4.36099	34.4908	39.515	57.2993	0.062207	2.02325	0	1.28228	0	0	0.10574	48.8883	0.404138	60.2862	0.156257	50.1667	0.068778	72.0609	28.0242	39.6669	45.2808	0	22.0027	0	0.069339	0.248854	0
NOCLEBFK_00595	88.4824	201.44	0.39854	43.0266	0.972601	43.2819	35.6805	54.9073	83.0833	0.093803	0.086651	0.062658	2.733	0.175446	0	0	0	25.4709	29.2738	13.782	8.5651	24.5516	4.48744	27.7965	71.0714	51.3171	0.256044	44.8544	45.3676	0	0.425988	0.155276	0.087045	2.22839	0.083171	54.5611	0.064315	21.4036	21.0619	1.31137	34.71	28.4187	11.9519	0	42.6755	0	0.627879	27.3687	3.49507
NOCLEBFK_00596	33.2433	0	0	0	0	0	0	0	0	0	0	0	0	0	0	0	0.182378	0	0	72.3056	0.197893	0	0.282765	0	0	82.3266	0	0	0	0	0	0	0	0	0	0	0	0	0	0	0	0	0	0.200052	0	0	0	0	0
NOCLEBFK_00597	33.1254	0	0	0	0	0	0	0	0	0	0	0	0	0	0	0	0	0	0	0	0	0	0	0	0	0	0	0	0	0.135936	0	0	0	0	0	0	0	0	0	0	0	0	0	0	0	0	0	0	0
NOCLEBFK_00598	34.6401	56.9173	50.3087	34.6246	9.13882	67.2866	53.0427	39.0475	109.778	49.9686	0	1.14964	0.202604	0.286136	0	0.055356	1.41611	13.4485	9.08675	118.936	88.1439	96.2714	59.4804	15.0403	45.4177	83.6937	14.0309	13.8392	43.8563	0.143462	36.6231	126.399	15.332	0	3.71328	60.6324	0	91.5365	0.207762	0	0	0.136319	0.456855	0.141214	0	0.068918	0	0.150346	0.267195
NOCLEBFK_00599	117.595	46.1419	91.7125	58.8288	0.262654	83.5337	42.0792	50.3459	18.6797	30.8373	0	0.124088	0	0.115817	0	0	0	19.9592	18.4991	23.8254	61.8557	21.745	6.30161	53.4246	23.9243	70.9033	0.101413	8.18914	71.7629	0.116136	0	0	0	50.7505	35.7424	63.2221	0	0	0	0.152766	8.0685	0.882827	0.147934	0	0	0	0	0	0.1442
NOCLEBFK_00600	224.382	148.368	223.592	63.8372	44.7543	52.6854	54.004	375.384	40.8542	82.8603	3.11264	0	1.48748	0	0	0.147786	0.257772	53.6565	80.5842	0.497306	295.271	87.3467	74.7361	58.1622	64.4694	14.4754	0.083613	29.164	60.1037	0	34.3801	0.380301	0	147.723	59.6847	21.0397	0	1.27547	0.092445	0.125953	0	0	173.683	0.848259	78.1059	0.091996	0	1.47174	0.11889
NOCLEBFK_00601	49.0225	0	0	3.87036	2.01848	0	2.77338	0	0	0	0	0	0	0	0.395708	0	0.072808	24.2543	35.6174	1.05349	0	0.060767	24.3831	0	0	0	0.070851	0	0	0.162272	0.505183	0	0	28.303	0.057536	38.9489	0	0	4.07339	56.9923	33.3089	20.5076	0	0	40.5527	0	0	0	1.30966
NOCLEBFK_00602	0.384446	0	0	0	0	0	0	0	0	0	0.765779	0	0	0	1.34804	0	0	0	0	0	0	0.51753	9.1333	0	0	0	0	0	0	0	0	0	0	0	0	0	0	0	0	0	0	0	0	0	0	0	0	0	0
NOCLEBFK_00603	60.7678	166.502	282.639	60.2053	115.653	109.073	192.706	88.8967	298.91	160.474	319.228	0	0	0.399871	0.078223	0.123774	0.143927	93.3855	74.3308	78.3031	45.68	90.0923	99.9707	16.1016	127.871	64.0369	1.75071	46.5734	55.5029	0	0	0.10617	0.238069	1.27988	43.9025	51.6732	0.175902	173.695	0.309701	0	0.072357	14.7831	4.59683	0	0	0.077049	0.078057	0.280141	0
NOCLEBFK_00604	145.177	0	2.86543	10.3756	1.58928	8.02301	0.266892	0	0	0	0	0	0.330805	1.63518	2.5133	4.51915	1.68159	2.92776	3.81931	0	1.36848	66.3141	0	22.9202	20.4714	0	1.84091	0.229404	0.381905	0	0.243078	0	0	0.178019	0.166107	134.471	0	0	0.226152	0	0	0.890309	0	0	0.206119	1.35032	7.5239	0	0
NOCLEBFK_00605	14.0406	120.731	0.49003	0	8.96907	0	106.803	0.356829	0	4.90183	1.06543	0	0	0	0	0	0	4.13069	14.9221	261.677	0	0	0	0	0	0	1.57411	0	0	0	0	0	0.535138	0	0	0	0	0	0	0	0	0	78.989	0	0	0	0	0	0
NOCLEBFK_00606	387.026	442.219	721.627	129.891	206.624	231.196	616.655	565.407	1912.98	129.745	0	0.594624	56.9805	0.277494	0	0.214736	0.499398	188.679	263.846	147.771	887.602	476.406	289.969	146.391	209.188	344.618	125.623	1.90759	0.226836	0.556517	0	1.47356	0.826052	478.139	94.5173	618.583	0.305172	95.1349	1.34325	55.2697	0.502127	25.6472	0	0.547795	0.73456	232.323	439.035	0.388813	1.382
NOCLEBFK_00607	33.1323	0	0	0	1.98901	0	0	0.186524	0.907544	0	0	0	0	0	0	0	0	0.981466	0	0	0	0	0	1.43691	0	0	0	0	0	0	0	0	0	0	0	11.938	0	0	0	0	0	0	0	0	0	0	0	0	0
NOCLEBFK_00608	0	0	0	2.00381	0	0	0	0	0	0	0	0	0	0	0	0	0	0	0	0	0	0	0	0	0	0	0	0	0	0	0	0	0	0	0	0	0	0	0	0	0	0	0	0	0	0	0	0	0
NOCLEBFK_00609	349.863	0.605983	0	20.8164	3.35363	43.8428	7.09612	154.807	0	648.815	0.262928	0	0.251298	0.177453	0	0.13732	0.159679	17.2367	6.91864	0	48.3402	0.13327	0	9.27105	0	14.485	0.155385	0	1.01541	0.177942	0.369311	0	0	0.405701	0.126185	0.176124	0	0	0.343596	0.234067	0	0	9.51984	0.350306	0	0	0	0.12432	0
NOCLEBFK_00610	55.156	0.17367	0	0	16.0316	67.6145	0	38.1583	0	0.122359	0	0	0.216061	0.152571	0	0	0	0	0.191887	153.952	0	25.0935	0	0	34.9273	3.40998	3.20631	0	0.124718	0	0	0	0.454176	0	4.23114	23.017	0.335577	0	0.147708	94.183	0	0	0	0	0	0	0	0.106888	0
NOCLEBFK_00611	0	0	0	0	0	0	0	0	0	0	0	0	0	0	0	0	0	0	0	0	0	0	0	0	0	0	0	0	0	0	0	0	0	0	0	0	0	0	0	0	0	0.87547	0	0	0	0	0	0	0
NOCLEBFK_00612	62.7515	0.126518	9.08927	1.6456	19.997	0	0.253978	0	0	0.089138	0	0	0	0	0	0	0	0	15.9359	73.0802	16.0612	0.166945	0	0	0.298176	21.2773	0	0	0.090856	0	0.115658	0	0	0	0	37.2862	0	0	0.107605	0	0	0	0.141969	0	0	0	0	0	0
NOCLEBFK_00613	60.7868	81.1517	0.098348	0.082181	0	19.027	0	39.1734	0	0.17361	0	0	0	0.072158	0	0.055839	0	0	12.0701	0	0.140908	49.6938	59.5967	16.7347	32.0053	1.12191	12.5737	1.13381	0	0	0	0	0	0	1.28277	0.143235	0	0	0	0	0	16.4323	0.645178	0	0	0	0	0.808841	0
NOCLEBFK_00614	76.3344	0	288.739	92.9652	2.41669	55.49	219.154	72.1292	0	0	0	0	287.329	0	0	0	0	77.0198	79.6104	1.66495	202.891	56.8216	0.29734	0	19.821	0	0	0	0.17422	0	0.221777	0.282939	0	0.16242	38.4941	0	0	0	0	0	0	0.203073	0	0	0	0	0	0	0
NOCLEBFK_00615	0	0	0	0.202972	0.269447	0	0	0	0.860602	0	0	0	0	0	0.348632	2.3445	0	0	0	0	0	0	0	0	0.15937	0	0	0	0	0	0	0	0	0	0.760371	0	0	0	0	0	0	0	0.22764	0	0	0	0	0.249712	0
NOCLEBFK_00616	194.022	223.059	243.107	130.623	68.0563	218.832	209.65	229.785	412.045	245.182	63.859	53.6879	2.84949	0.778901	0.825333	1.25571	2.16105	242.294	143.759	198.431	206.477	118.845	170.607	50.7844	84.5117	81.7447	17.2782	36.9711	41.0146	17.0528	28.5031	0.344679	2.02882	60.2488	106.296	216.008	1.35627	109.126	41.0972	40.2397	49.6822	23.0687	65.5803	0.64067	26.8612	41.0851	1.07699	0.454735	1.0506
NOCLEBFK_00617	114.331	0.409258	0	99.502	0	0	204.98	14.63	5.20852	0	0	0	0	0	0	0	0	0	0	36.9812	168.853	0	1.5048	0	39.546	0	0	0	0	0	0.374128	0	0	29.3175	0.255661	0.356843	0	0	0	0	0.325291	0	0	0	0	0	0	0.251884	0
NOCLEBFK_00618	146.953	98.6761	205.992	13.7703	157.095	66.2613	156.027	311.14	123.966	46.8388	0	0	0	0.107955	0	0.083539	0.097141	133.274	50.6437	18.6941	135.34	116.181	45.0327	63.4167	221.554	38.8148	20.6073	47.0715	56.6546	0.216504	0.112336	0.143316	0	18.7576	59.0323	177.541	0.237445	34.7035	0.104514	0	83.7051	52.6654	33.2318	0.106555	0	61.0517	60.6913	5.52105	0
NOCLEBFK_00619	28.0593	0.386833	132.624	33.1561	70.6468	152.361	101.598	99.9464	128.329	0.181695	0.167842	0	0	0.113279	0	0.087659	0	99.3835	40.3189	68.1398	29.0886	54.5321	4.26703	7.36171	18.8415	0.770547	27.6742	16.0193	30.7428	0.11359	0	0	0.33721	27.5384	20.2182	125.584	0	7.86805	0	0	0.409956	0	32.9897	0.11181	0	0.109135	0	0.158721	0.282079
NOCLEBFK_00620	217.981	92.4485	323.228	215.939	168.782	198.287	219.834	228.479	141.045	171.008	0.656382	0.158212	0.836463	0.295333	0	0.11427	0.265751	98.7075	209.12	339.535	401.683	283.57	7.82854	78.2774	10.9601	75.4782	136.155	9.28102	99.5852	45.6066	0.15366	0.196036	0.219789	134.815	141.86	35.1745	40.4364	166.735	0.714802	56.6802	11.3561	71.7573	0.377232	1.60328	193.23	709.48	434.974	83.4859	1344.17
NOCLEBFK_00621	49.8066	0	0.17947	1.7996	0	0	0	21.6939	0	0.528016	0	0	0.186473	0	0	0	0	42.4969	0	0	0	0	0	0	47.336	0	0	0	0	0.39612	0	0	0	0	0	0	0	0	0	0	0	0	0	0	0	0	0	0	0
NOCLEBFK_00622	325.51	380.02	407.318	128.675	31.9827	272.935	140.072	363.306	75.4992	108.732	0.142471	0	177.427	0.096155	0.09405	0.297633	0.086524	169.826	110.533	222.47	265.974	111.859	123.954	139.068	180.57	40.4588	26.7746	122.097	77.108	0	0.200115	0	0.286237	24.2549	48.751	177.318	0.317237	190.685	0.651633	42.8691	13.5714	57.2619	28.1257	0.189817	6.61787	0.092638	0.09385	84.4073	0.23944
NOCLEBFK_00623	0	0	0	0	0	0	0	0	0	0	0	0	0	0	0	0	0	0	0	0	0	0	0	0	0	0	0	0	0	0	0	0	0	0	0	0	0	0	0	0	0	0	0	0	0	0	0	0	0
NOCLEBFK_00624	211.343	209.797	102.064	9.23546	13.0926	186.452	58.1062	0.894233	186.704	0.160578	0	427.227	11.7672	0	0	0.077471	0	8.78329	37.1439	0	41.6409	29.8489	22.2076	25.259	43.4197	28.9908	0.175325	12.4861	7.20164	0.301166	0	0.265812	0	0.152588	25.2009	171.103	0	31.4695	0	0.132052	56.4297	66.8685	0	0	44.7868	0.096451	0.097713	0.070137	0.249295
NOCLEBFK_00625	68.0625	121.918	4.21177	5.98296	24.6683	9.51782	16.5234	44.1636	0.656579	27.4594	0.274719	0.132435	4.20107	0.061804	0.06045	0	0	5.48682	20.7539	0.643747	27.8186	6.12682	23.5392	2.04761	0.165802	0.120115	0	16.0233	0.050521	38.2379	15.6278	0.246144	0	9.32565	13.3601	0	0.067968	22.5093	1.25651	0	0	0.058888	0.078942	0.061003	22.3589	0.059543	0	0.173193	0.1539
NOCLEBFK_00626	0	0	0	0	0	0	6.74856	99.0711	0	0	0	0	0	0	0	0	0	0	0	0	0	25.2851	88.1741	0	0	0	0	0	165.613	0	0	0	0	0	0	0	0	0	0	0	0	0	0	0	0	0	0	0	0
NOCLEBFK_00627	118.6	0	0.249352	12.0849	27.3834	24.1206	43.8955	4.44852	0	0	0	0	0	0	0	0.070787	0	0	5.17713	63.3614	12.0575	9.54913	13.7829	0.466254	28.7938	10.3113	8.49046	17.0683	33.4247	0	0	0	0	0	10.0172	21.2448	0.100599	0.896024	0	0	0.082762	0.958756	0.116842	0	6.53791	0	0	0.128171	0
NOCLEBFK_00628	27.4889	0	0	0	0	0	0	0	0	0	0	0	0.30338	0	0	0	0	0	0	0	1.04586	0	0	0.272988	0	0	0	0	0	0	0	0	0	0	0	0	0	0	0	0	0	0	0	0	0	0	0.418191	0	0
NOCLEBFK_00629	74.6248	0.103439	7.05967	0.103493	38.4	29.1968	0.51912	0.36075	0.087763	0	0.673212	0.097361	0.900807	0.272615	0.533292	0	0	0.379644	1.0286	0	0	2.32036	1.141	0	11.7829	0.176609	0.397853	1.33861	0.891392	2.64254	0.09456	0.241275	0.135255	0.277006	0.064618	1.80382	0	0.485518	0.175951	27.9281	0.246649	3.37681	0.232143	0.089694	0.721644	4.02722	1.15301	0.318314	0.113142
NOCLEBFK_00630	67.7206	46.8871	0.956946	8.97365	4.95376	59.2057	1.42611	14.3237	0.45206	0	0.115589	0	49.7143	0	0	0	0	16.459	6.86811	0	0.07617	1.17177	0.217675	0	20.231	0.682277	0.751416	0.076612	32.9058	0.078227	0.081179	0	0.116115	0.535065	17.4187	0	0	32.164	0	0	0.070582	0	0	0	0.481853	0	0.076142	0	0.097131
NOCLEBFK_00631	26.4381	0	111.515	3.71282	0	7.92845	19.8044	75.2841	22.3465	0	0.117812	0	21.3942	0	0	0	0	23.0041	13.5004	0	57.838	1.73174	0	17.0219	0.071104	0	0	0	0.064997	0	0	0	0.118348	0	0	41.4315	0	0	0.076979	0.31464	0	0	0	0.078482	0.07016	0	0	0.055705	0
NOCLEBFK_00632	72.76	0.145261	0	0	0	0	0	0	0	0	0	0.136727	0	0	0	0	0	0	0	0	0	0.095839	0	0	0	0	0	0	0	0	0	0	0	0	0	45.2166	0	0	23.9679	0	0	0	0	0	0	0	0	0	0
NOCLEBFK_00633	0.172785	0	0	0	0	0	0	0	0	0	0	0	0	0	0	0	0	8.57221	0	0	0	0	0	0	0	0	0	0	0	0	0	0	0	0	0.220232	0	0	0	0	0	0	0	0	0	0	0	0	0	0
NOCLEBFK_00634	29.2396	69.2713	0	0	0	0	0	0.144491	0	0	0	0	0	0	0	0	0	0	0	0	0	1.7494	0	0	0	0	0	0	0	0	0	0	0	0	0.103525	0	0	0	0	0	0	0	0	0	0	0	0	0	0
NOCLEBFK_00635	518.927	407.279	162.431	45.5506	45.7602	68.2641	71.0142	278.129	378.701	0.216728	0	0	3322.56	0.27024	0.264322	0.209122	0.243171	339.831	92.7868	0	146.177	144.909	125.171	123.28	94.7304	62.7625	25.3196	1.32694	164.354	0.541968	0	0.717518	0	120.065	38.6249	474.204	0	110.937	86.8601	0.356455	0.2445	64.1153	0	0.266737	0.238452	0.520712	0.263761	0	0
NOCLEBFK_00636	1.46456	0	0	47.0894	30.0982	0.484749	0	0	0	0	0	0	0	0	0	0	0	0	0	0	0	0	0.915619	0	0	0	0	0.214838	0	0	13.6587	0	0	0	0	0	0	0	0	0	0	0	0	0	0	0	0	0	0.817135
NOCLEBFK_00637	193.587	0	1.06327	36.7831	0.117947	67.5896	1.42611	3.87126	10.2467	0	0	0	0	0	0	0	0	14.8294	1.76608	6.50063	0.15234	0.117177	4.13583	0	12.8362	0	0	0	0	0	0	0	0	2.49697	0	0.619425	0	0.138937	0	41.1605	0.141164	0.148665	0	0	0.137672	0	0	0	0
NOCLEBFK_00638	34.9569	0	0.387309	4.28821	21.3206	0	0	11.4927	0	0	0	0	0	0	0	0	0	0	19.5675	1.47995	0	0	0	9.41481	0.254116	0	0	0	0	0	0	0	0	0.16242	0	0	0	0	0.206334	0	0	0	0	0	0	0	0.069339	0	0
NOCLEBFK_00639	1260.1	2772.78	2078.64	2002.65	1889.19	1505.15	2170.34	3121.62	4041.68	3817.12	0.875176	568.299	2520.26	1.18133	2.31093	0.91416	1.59451	1856.93	1814.85	1549.63	2245.73	2538.27	1230.32	1849.3	3105.28	2051.4	1651.96	2163.06	1453.34	277.193	97.7277	0.784144	5.27493	630.638	857.669	1067.55	4.54706	1884.05	480.918	1731.18	141.083	666.358	667.7	2.33204	1143.49	98.448	1.72952	2.06904	514.795
NOCLEBFK_00640	141.254	1.94081	2.90482	4.36912	0.644451	122.314	6.33112	416.699	41.5786	0	0	0	0.603633	0	0	0	0	0	45.5682	13.8746	0	14.0854	5.35212	52.1436	12.5787	2.48527	0	0	131.013	0	0	0	0	156.248	0	0	0	0	0	0	0	0	0	0	0	0	0	0	0
NOCLEBFK_00641	282.568	0.588309	0	0.588618	3.12559	2.29044	0	0	0.499149	0	0	0	0	21.1902	0	0	0	0	5.85016	0	208.916	0	40.3788	0	0	0	0	3.55289	0.422483	0	1.07562	0	0	0.393868	1.83756	0	0	253.587	0	0	0	0	0	0	0	0	0	0	0
NOCLEBFK_00642	638.88	441.945	563.535	847.61	730.961	810.33	836.719	479.057	320.363	493.623	433.709	953.781	755.637	664.522	719.825	349.528	589.081	803.821	682.321	290.17	387.34	412.848	531.61	587.337	401.39	322.646	329.27	739.494	532.712	671.064	518.742	571.98	400.482	686.165	699.833	431.665	382.022	387.012	410.751	709.609	700.842	690.179	329.878	403.469	460.047	677.638	803.899	324.009	440.696
NOCLEBFK_00643	115.384	220.288	310.622	99.537	34.402	146.949	84.1428	369.049	369.96	4.20842	0.134053	0	0.128123	0.090474	0	0.070012	0.244235	141.554	78.059	54.3046	290.542	178.225	67.277	104.682	110.76	23.7379	7.36768	56.3309	41.4162	18.0539	0	0	0.403988	56.6756	68.3879	136.67	0.895483	54.6234	7.53279	16.3494	23.984	0	88.6371	0.357205	0.159664	0.52299	0.17661	0.126769	0
NOCLEBFK_00644	45.0389	0	0	15.0048	13.8797	0	23.7	0	0.135363	0	0	0	0	0	0	0	0	10.3936	0.88138	0	0	0	0	0	0	0	9.45002	0	0	0	0	0	0	0	0	0	0.154138	0	21.982	0	0	0	0	0	0	0	0	0	0
NOCLEBFK_00645	36.8123	0.068909	0.66007	10.8244	17.0694	0.06707	19.5046	0.060081	0.818517	0	0.089696	0	0.085728	0.060537	0.059211	0.046846	0	0	0	52.8087	54.7923	0.090928	0	0	0	0	0.106016	0	0	0	0	0	0	0.645874	2.88414	0	0	0	0	0	0	0	0	0.059752	0	0	0	0	0
NOCLEBFK_00646	0	0	0	0.625081	0	0	0	2.36044	0.17669	0.146723	0	0	0	0	0	0	0.164625	0	35.8948	0	0	50.2875	14.5486	0.233127	39.1007	102.757	5.60691	0	0	0	0	0	0	0	0	0	0.201198	36.3297	0	0	0	0	0	0	0	0	0	0.128171	0
NOCLEBFK_00647	158.101	0	0	9.92696	0	0	0	137.746	0.431697	0	0	0	0	0	0	0	0	28.245	0	0	0	0	0	49.8388	0	0	0.195701	0	0	0	0	0	0.332653	0	0	0	0	56.3223	0	0	0	0.851809	0	0	0	0	0	0	0
NOCLEBFK_00648	61.7629	1.31957	1.31667	0.110022	21.105	0	0.220747	38.8302	0	0	0	0.931531	0	0	0.094489	0	0	1.10988	16.4023	47.4186	0	0	0	0	0.172775	0	0	0.189741	0	0	0.100525	0	0	0.14724	10.6476	42.6669	0	13.936	0	0	0	0	0.123394	0	0	0	0.188577	0	0
NOCLEBFK_00649	92.1095	0.750462	45.6348	30.0343	0.569583	56.1914	69.3533	107.402	194.429	2.15272	0.907073	48.9413	64.3543	0	0	0.036441	0.042375	18.4444	18.5973	86.6362	14.6215	5.44645	37.2515	0.360046	24.4246	2.28807	10.9274	0.046247	0.192475	0.330551	0.049003	0	0.280368	26.6646	0.200918	15.5174	0.103578	4.48698	31.0931	50.5622	9.41603	10.1856	4.09026	0.046481	6.39909	0.04537	0	22.0384	0.117265
NOCLEBFK_00650	74.5311	0	83.6174	22.4768	46.3775	0	0	62.3064	0	0	0	0	0	0.089302	0	0	0	0.186542	1.46008	0.116271	119.105	2.48146	0	0	0.239571	0.433893	6.02107	56.9164	0	0.089548	0	0	0	0	0	0	0.098209	0	0.259366	0	48.9623	4.67989	0	0.088144	0	0.086035	0	0.062563	0
NOCLEBFK_00651	168.964	14.7077	0	0	69.935	95.6259	0	68.7342	0.499149	1124.1	0	0	0	0	0	0.399945	0	9.17671	91.0025	0.672917	0	0.388148	0.72105	0	51.7634	0	0	0.507556	0	0	0	0	0	0.393868	0	0	0	0	0	22.4968	0	0	0	0	0	144.4	0	0	98.4546
NOCLEBFK_00652	4.32502	0	0	158.927	622.187	0	214.794	0	0	0	0	0	0.914882	0	0	0	0	0	147.066	0	0	35.9037	155.927	4.11615	78.5695	0	0	0	0.528103	0	0	0	0	1.96934	0	0	0	0	0	403.067	0	0	0	0	0	0	0	0.452603	0
NOCLEBFK_00653	326.744	310.886	232.394	238.471	237.573	673.053	241.4	488.848	677.011	448.565	26.6969	21.9465	337.885	0	3.15368	0.880613	0.511997	391.038	155.289	477.339	373.146	378.604	78.8524	228.873	247.284	167.165	162.256	43.0258	367.909	0.190186	3.94722	0.755368	3.10527	88.7467	319.77	439.923	0.417162	606.998	2.57066	8.25569	131.616	88.0088	1579.77	22.0902	0.669415	8.95361	3.14699	157.589	0.944578
NOCLEBFK_00654	399.596	21.3677	0.167221	15.9294	31.8123	23.5161	64.6219	124.08	115.767	64.2525	0	20.5066	0	0	0.120004	0.094942	0	82.1403	12.6532	0	47.6775	26.7212	28.9276	28.454	41.6916	7.98801	5.15674	0	1.00293	0	0	0	0	0.186999	47.8966	6.94096	0.134928	0.109254	0.11878	69.2644	76.26	0.350708	170.661	2.7853	0.108259	0.118203	0.239498	134.69	0.152758
NOCLEBFK_00655	575.949	205.173	88.9329	332.569	309.14	765.15	144.672	518.072	147.873	396.877	0	6.92179	2.74464	0.646042	0	0.499931	0	375.165	208.818	0	596.091	127.118	263.183	185.227	12.7098	497.837	127.282	350.214	0.528103	0.647821	0	0	4.80788	442.609	362.459	911.789	14.2096	5.17759	106.327	1.7043	0	0.615565	12.3779	10.2027	157.334	0	0.630554	0	0.804367
NOCLEBFK_00656	253.939	0	0.498703	0	0.553201	162.966	163.458	134	0.35338	0	0	0	0	0	0	0	0	0	0.460189	0	0	0	0.510478	0.466254	0	0.355562	0	0	0.598205	1.10072	0.38075	0	0	0	0	108.584	132.388	0.651654	4.95933	0.482634	0	1.04592	13.0863	1.08347	82.3292	800.566	1172.81	0	899.752
NOCLEBFK_00657	230.827	70.5971	224.831	63.0024	33.4114	209.141	122.498	245.646	30.5686	86.2145	0	0.152757	226.133	0	0	0	0	66.8615	49.8496	121.218	205.053	95.1899	130.087	39.7876	78.1551	41.8411	17.3532	50.9656	59.4389	0	0	0.378552	0	147.877	132.203	413.058	0.313591	15.2352	39.4768	46.6391	2.06392	0.135849	0	0.281453	123.288	0.13736	0	0.099885	0.532547
NOCLEBFK_00658	0	0	0	0	0	0	0	0	0	0	0	0	0	0	0	0	0	0	0	0	0	0	0	0	0	0	0	0	0	0	0	0	0	0	0	0	0	0	0	0	0	0	0	0	0	0	0	0	0
NOCLEBFK_00659	0	0	0	0	0	0	0.613505	0	0	0	0	0	0	0	0	0	0	0	4.05206	0	1.04858	0	0	0	0	0	0	0	0	0	0	0	0	144.043	0	0	0	0	0	0	0	0	0	0	0	0	0	0	0
NOCLEBFK_00660	98.1386	0	0	0	0	10.2029	0	0	0	0	0	0	0	0	0	0	0	0	0	0	0	0	0.2622	46.9391	0	0	0	0	0	0	0	0	0	0	1.87097	0	0	0	0	0	0	0.179073	0	0	0	0	0	0	0
NOCLEBFK_00661	231.76	136.738	70.2751	16.0912	23.5806	66.748	131.797	240.142	124.522	1604.21	0.453124	0.065532	7.88206	0.122327	0.119649	0.094662	0.110074	0.447177	54.0784	65.4601	35.5926	82.0852	3.07193	18.4715	27.4569	36.4935	13.0679	31.2943	50.8979	0.122664	0	0	0.637258	32.2086	18.3104	38.9122	0.538114	21.5682	7.28336	0.161354	0.27669	32.2862	76.4061	0.362225	0	60.6945	0.23879	0.1714	0.380766
NOCLEBFK_00662	0	151.557	0	0.432013	0	48.1203	9.53466	0	0	0	0	0	0	0	0	0	0	1.78285	0	0	0	0	0	37.2191	0	0	0	3.72518	0	0.190186	0	0	0	0	0	0	0	0	0	0	0	0.180716	0	0	0	0	0	0	0
NOCLEBFK_00663	48.9175	0.40573	0.485806	12.5842	0	355.808	0	211.544	0	593.439	0	0	1.00953	0.356437	0	0	0	30.527	79.347	0	19.8371	21.1474	83.0451	109.007	0.31874	162.1	1.24843	0	0.874102	0	0	0	0	0.271633	0	209.076	0	0	0	0	0.322487	0	0.910559	0	0	0	0	0	0
NOCLEBFK_00664	0.704329	0	0	0	0	0	0	0	0	0.084375	0	0	0	0	0	0	0	0	8.46842	0	0	0	30.8235	0	0	35.169	0	2.6863	0	0	0	0	0	0	0	0.10442	0	0	0	0	0	0.100245	0	0	0	0	0	0.073706	0
NOCLEBFK_00665	9.70098	0	0	0	0	0	0	0	0	0	0	0	0	0	0	0	0	0	0	0	0	0	0	0	0	0	0	0	0	0	0	0	0	0	0	0	0	0	0	0	0	0	0	0	0	0	0	0	0
NOCLEBFK_00666	40.2523	0	0.0933	11.0707	0.206992	0.455054	0.234635	23.0994	41.7831	0	58.3209	0	0	0.068455	0	0	0	0	7.14589	0	0	0.205641	11.9379	0.261689	2.32617	0	0	0	0.615537	0.343216	0.071233	0.272633	0	0.260839	0	9.85158	0.075283	0.060958	1.19291	0	0	0	0.087438	0.135135	0.060403	0	0	0	0
NOCLEBFK_00667	1.50028	0	0	0.09571	0	0	0	0	0	0	1.12065	0	0	0.084038	0	0	0	0.351094	0.105694	0	0.082053	0	0	0	0.07515	0	0	0	0.75566	0	0.174897	0	0	0	0	0	0	0	0	0.110849	0	0	0	0	0	0	0	0.176626	0.104633
NOCLEBFK_00668	72.8812	89.6232	52.7565	45.3361	213.471	122.319	155.289	99.9691	21.028	0.35276	0	0.706907	396.786	0.439858	0	0	0	162.861	193.069	0.859043	15.2462	110.333	205.269	123.59	90.8613	214.357	9.82146	391.358	40.9898	0.441069	0	0	0	2.51405	143.721	105.867	0.241865	148.253	0	74.5541	366.325	375.311	0	0	504.166	0.211885	43.3607	0	0.273827
NOCLEBFK_00669	25.4166	0.195695	0	0	0.259924	12.3808	0	0	0	0	0.254729	0.460494	0.365192	0.429799	0.084078	0.133038	0	0	3.67577	0	49.1828	0.064557	44.1325	5.14818	0	0	1.80647	23.299	4.70791	0.344786	0	0	0	0.196524	0.427873	0	0.094534	44.7026	0	0	0	0.245714	0	0	0	1.07661	0	0	0
NOCLEBFK_00670	12.4915	0	0	0	0	16.6321	0	0	0	0	0	0	0	0	0	0	0	0	0	0	0	0	0	0	0	0	0	0	0	0	0	0	0	0	0	0	0	0	0	0	0	0.121219	0	0	0	0	0	0	0
NOCLEBFK_00671	53.5778	4.27861	1.66499	22.2605	0.568288	0	0.429454	59.8743	73.1481	19.8956	0	0	0	0	0	0	0.084557	37.8846	10.0457	0	53.0317	0.282289	0	0.47897	29.0749	0	0.082283	0.184566	0	0	0	0.12475	0.139866	2.9361	0	0	4.44372	7.19633	0.181949	0	0	0	0	0	0	0.090533	0	0	0
NOCLEBFK_00672	40.511	0	0	0	8.88838	0	56.245	0	0	0	0	0	0	0	0	0	0	0	0	0	0	0	0	0.329292	13.1719	0	0	0	0	0	0	0	0	0	0	0	0	0	0	0	0	0	0	0	0	0	0	0.090521	0
NOCLEBFK_00673	66.5352	0	54.1083	0	44.5801	210.246	23.1494	0.163488	99.7503	0.132109	0	0	0	0.329455	0.161121	0	0	0.17205	0	25.3081	0	0	0.229817	0	0.589225	0	0	0	3.63571	0	0	0	0	0	4.21688	0	0	0.146687	0.159478	0.651844	0	0	0	0	0	0	0	0	0
NOCLEBFK_00674	1.58474	0	0	0	0	0	0	1.40961	6.85854	0	0	0	0	0	0	0	0	0	0	0	0	0.474074	0	0	1.27009	0	0	0	0	0	0	0	0	0	0	0	0	0	0	0	0	0	0	0	0	0	0	0	0
NOCLEBFK_00675	25.7362	0	0	0	0	0	0	0	0	0	0	0	0	0	0	0	0	0	0	0	0	0	0	0	0	0	0	0	0	0	0	0	0	0	0	0	0	0	0	0	0	0	0	0	0	0	0	0	0
NOCLEBFK_00676	61.7375	0	0	0	0	0	0	0	0	0	0	0	0	0	0	0	0	0	0	0	0	0	0	0	0	0	0	0	0	0	0	0	0	0	0	0	0	0	0	0	0	0	0	0	0	0	0	0	0
NOCLEBFK_00677	3.97703	17.8521	0.323871	4.33006	1.25742	1.05308	2.17195	2.12252	0.917976	0	3.52082	0.509189	1.34603	0.237625	0.464843	3.67766	1.9244	0.496374	12.5521	2.16571	41.2982	5.71068	1.32607	0.605594	1.91244	2.54002	9.36326	0.466718	0.194245	3.57418	7.66533	0.946381	17.6842	21.5495	1.52074	0.471689	1.0453	0	3.91087	4.38808	0.644974	1.35849	0.910559	0.703633	7.33856	0	3.94278	2.16417	0.295859
NOCLEBFK_00678	0	0	0	0	0	0	0	0	0	0	0	0	0	0	0	0	0	0	0	0	0	0	0	0	0	0	0	0	0	0	0	0	0	0	0	0	0	5.9625	0	0	0	0	0	0	0	0	0	0	0
NOCLEBFK_00679	66.0832	0	0	0	0	0	0	0	0	0	0	0	0	0	0	0	0	0	0	0	0	0	0.389757	0	0	0	0	0	0	0	0	0	0	0	0	0	0	0	0.811396	0.368497	0	0	0	0	0	0	0	0	0
NOCLEBFK_00680	0	0	0	0	0	0	0	0	0	0	0	0	0	0	0	0	0	0	0	0	0	0	0	0	0	0	0	0	0	0	0	0	0	0	0	0	0	0	0	0	0	0	0	0	0	0	0	0	0
NOCLEBFK_00681	166.227	0.24902	99.5876	33.8845	103.855	0.242375	98.229	65.5697	93.8084	0.350893	0	0	0	0	0	0.169289	0.196853	39.5287	143.348	364.871	202.705	10.1863	18.9228	36.2395	109.161	1.06292	100.568	18.9058	42.3824	0	0	0.290424	0.325613	98.5294	2.48897	2.82265	0	9.35071	0	0	60.5661	67.7447	0.279431	12.9558	46.1348	0	0	0.153262	0.544757
NOCLEBFK_00682	72.5353	0	63.822	18.7223	0.188288	0	0	62.7891	0.240554	0	0	0	0	0	0	0	0	0	0	0	0	0	0	0.63478	0	0	0	0	0	0	0	0	0	0.189816	0	27.4404	0	0	0	0	70.5353	0	0	0	13.846	0	0	0	0
NOCLEBFK_00683	1515.2	3.67693	1.76105	5.15041	243.21	33.6408	214.056	301.353	32.4447	1.03623	1.91445	2.07654	0.914882	5.16833	5.05517	0.999863	4.06931	165.316	3.25009	0	2.52313	138.763	129.789	23.0504	1.15543	0.627789	7.91976	1.90333	1.05621	5.18257	1.34452	0.857658	0.961576	2.46167	2.29695	1.2824	1.42096	0	0.625451	3.4086	2.33803	3.07782	0.825194	0	3.42029	0.622413	0	0.905206	1.60874
NOCLEBFK_00684	0	2.75379	0	0	0	0	0	0	0	0	0	0	0	0	0	0	0	0	0	0	0	0	0	0	0	0	0	0.647944	0	0	0.45771	0	0	0.167603	0	0	0	0	0	0	0	0	0	0	0	0	0.858627	0	0
NOCLEBFK_00685	570.836	341.828	340.064	155.612	94.3963	195.411	125.837	212.429	141.999	65.6042	0.352082	43.3447	15.7318	0	0.232421	0.137912	0.267278	153.069	131.124	268.548	217.628	84.3218	61.5793	102.345	45.2611	41.9681	11.8081	44.2215	50.2609	0.655267	1.7927	0.394325	0.176842	128.935	65.0539	153.594	11.6943	69.2462	39.2237	0.313435	32.5174	19.0188	52.1295	2.9318	67.2003	396.513	415.267	62.3864	642.162
NOCLEBFK_00686	0	0	0	0	0	0	0	0	0	0	0	0	0	0	0	0	0	0	0	0	0	0	0	0	0	0	0	0	0	0	0	0	0	0	0	0	0	0	0	0	0	0	0	0	0	0	0	0	0
NOCLEBFK_00687	0	0	0	0	0	0	0	0	0	0	0	0	0	0	0	0	0	0	0	0	0	0	0	0	0	0	0	0	0	0	0	0	0	0	0	0	0	0	0	0	0	0	0	0	0	0	0	0	0
NOCLEBFK_00688	0	0	0	0	0	0	0	0	0	0	0	0	0	0	0	0	0	0	0	0	0	0	0	0	0	0	0	0	0	0	0	0	0	0	0	0	0	0	0	0	0	0	0	0	0	0	0	0	0
NOCLEBFK_00689	3.43548	0	0.299753	0	0	0	2.26148	0	0	0	0	0	0	0	0	0	0	0	0	0	0	0	0	0	0	61.5501	0	0	0	0	0	0	0	0	0	2.83766	0	0	0	0	0	0	0	0	0	0	0	0	0
NOCLEBFK_00690	2884.27	98.8359	460.972	727.061	817.028	557.035	1517.35	1332.83	2082.05	565.036	1.22525	0	11.7105	1.65387	32776.1	0.639912	1.48821	541.534	735.3	835.494	528.849	925.966	867.567	1083.24	921.389	1531.61	40.5492	557.093	408.963	501.672	48.1877	0	1.23082	1.89057	652.114	1200.74	1.81883	550.067	0	20.7243	488.555	26.0015	369.687	0	3.64831	11.1536	1125.92	0.579332	773.222
NOCLEBFK_00691	760.58	150.607	362.185	103.342	118.772	416.984	85.2872	320.298	521.921	0.35848	0.331148	0	0	0	0.218602	0	0.201109	123.484	64.9315	79.1496	122.42	212.327	221.694	145.814	67.3524	191.554	12.3291	93.5	103.04	0.672333	0.232566	0.296703	0.665307	0	102.188	114.46	0.245787	69.8555	0	18.2775	116.067	185.481	0.570945	0	108.463	53.615	1.30883	0	1.11307
NOCLEBFK_00692	3.14547	0	0	0	0	0	0	0	0	0	145.796	0	0	0	0	0	0	0	0	0	0	0	0	0	0	0.260899	0	0	0	0	0	0	0	0	0	59.0239	0	0.11954	0	0	0	0	0	0	0	0	0	0	0
NOCLEBFK_00693	189.66	0	0	0	0	79.7412	66.0484	6.07931	0.36974	0.307032	0	0	0	0.382839	1.12337	0	0.344492	44.7839	0	0.996914	2.24279	116.444	0.534111	17.0744	88.6688	1.48809	1.00568	43.2362	8.7626	0	0	0	0	0	0.272232	0.759943	0.421024	11.2501	1.11191	0.504978	0.69275	0.729558	82.6417	0	0	0.368837	0	1.07284	2.85997
NOCLEBFK_00694	230.931	184.763	416.855	243.251	152.35	325.373	364.557	207.873	248.833	115.774	152.456	3803.55	153.24	521.677	53.3826	3.83947	0.531502	138.067	213.057	250.248	19.2623	130.063	116.192	154.146	218.251	70.3698	5.89618	147.452	20.3757	0.829211	5.53175	33.875	2.46163	113.974	142.973	223.006	49.2382	25.5625	43.2312	117.957	7.4817	233.675	3.31964	0.233204	127.066	78.6445	17.4105	0.331047	152.379
NOCLEBFK_00695	102.083	16.022	1.59868	121.564	58.0782	96.8158	0	695.273	217.785	550.54	0	0	90.1126	0	0	0	0	113.627	0	123.702	8.01677	59.461	108.822	0	15.4713	5.12917	34.4072	13.2469	104.752	0	0	0	0.43646	8.04496	68.3938	285.803	0	0	0	0	0	0	0	0.578875	0	0	0	0.205437	0.365103
NOCLEBFK_00696	587.504	847.521	419.236	388.488	432.846	837.052	707.883	271.082	1098.73	808.135	282.178	601.735	274.575	0.313232	0	0	0.563714	233.262	709.504	590.128	233.046	459.191	163.001	475.777	1100.81	146.104	168.406	183.028	161.568	0.314095	0	1.2475	0.932437	478.609	374.64	312.751	1.03342	297.337	64.5921	0	355.947	259.955	73.6173	2.47338	529.282	0.603552	0.305723	0.438888	0
NOCLEBFK_00697	0	0	0.227232	0	0	0	0	0	0	0	0	0.714508	0.236098	0	0	0	0	0	0	0	0	0	0	0.849786	0.149088	0	0	1.14609	0	0	0.520461	0	0	0	0	0	0	0	0.322814	0	0	0.158855	0	0	0	1.12436	0	0	0
NOCLEBFK_00698	63.7607	1.96688	0	3.37357	5.97127	1.09394	1.41015	2.32738	8.82079	3.26645	0	2.77698	0.174783	0.370269	18.1081	0.477546	0.777421	8.6369	9.46891	18.1587	8.55607	0.834228	1.03315	0.629095	1.43481	2.15885	0.216147	1.09087	0.302674	0.123763	0.513728	0.819255	0.734816	1.1287	59.5041	0.857488	0.4072	0.659435	0.477957	0.325598	3.90835	1.88161	3.94123	0	3.70277	0.118909	22.2859	2.33462	25.8166
NOCLEBFK_00699	14.5097	7.21153	0	0	7.05777	0	0	38.2225	0	0	0	0	0	0	0	0	0	27.3386	0	0	0	0	0	0	0	28.5138	0	0.327455	0	0	0	0	0	28.9683	0	4.30226	0.183349	0	0	0	0	0	0	0	0	0.160623	0	0	60.4054
NOCLEBFK_00700	98.5801	932.872	260.709	324.421	339.537	601.301	521.131	1232.79	385.028	857.782	1.28973	0	17.8739	0	0	0.336796	0	539.125	215.943	406.017	379.055	564.49	239.237	249.846	406.712	92.8335	115.855	178.66	238.013	0	0.452892	0.577791	1.9434	205.64	44.1015	294.386	1.91455	365.278	4.63492	170.215	94.8994	154.889	131.475	0.214793	113.29	0	0.424795	5.33595	1.08378
NOCLEBFK_00701	1.5165	2.52423	1.46246	2.6885	5.78612	1.58508	8.90856	1.13593	1.45081	0.401585	2.33178	0.996355	2.63385	1.28761	3.07858	0.221423	0.51495	6.5748	0.899678	4.0049	0.209534	3.33082	0.798394	7.8392	1.98303	2.29393	0.876928	2.1075	0.2339	4.08867	0.372186	6.45766	0.851777	3.87053	3.15374	5.32486	0.393345	9.74606	0.692541	6.22748	6.40733	2.79454	1.82742	2.33002	8.45803	6.06476	4.81752	1.50346	0.801584
NOCLEBFK_00702	44.3125	0	0	0.12392	8.14297	1.08495	0.621578	0	0	0	0	2.0984	0	0.108807	0	0	0	4.43209	0.684229	0	0	0	0	0.415948	0	0	0	0	1.77887	0	0	0	0	0	0.077371	0	0	0	0.526696	0	0	0.933067	0	0	0.096008	1.67724	0	0.076228	0
NOCLEBFK_00703	63.7831	96.8927	57.9544	50.9244	61.5646	0.780832	97.0744	91.0084	199.433	0.062802	0.348081	0.755105	23.177	4.62018	0.459561	0.666575	0.070464	24.6184	25.6068	2.03914	45.5694	17.9371	12.1267	38.4174	10.9941	68.2578	12.6168	61.3681	1.40827	1.02081	0.65189	0	0	93.1557	44.3799	0.155443	0.172237	23.3602	0.530686	25.6162	51.7909	268.983	0.400094	0.077293	1580.18	7.5444	51.0558	0.274305	0
NOCLEBFK_00704	34.8421	0	0	0.658593	96.3904	0	0	0.860882	33.7886	0	0	0	0	0	0	0	0	111.736	0	0	0.564618	0	0	0	0	0	0	0	0	0	0	0	0	0	0	0	0	0	0	0	0	0	0	0	0	0	0	0	0
NOCLEBFK_00705	47.4933	59.1529	2.7287	92.2953	25.7943	175.038	90.2033	27.2993	118.871	21.8503	0.644867	68.5476	1.84902	3.48182	1.19196	0	0.23498	37.8205	46.7465	90.7801	55.8383	36.8046	66.9134	62.4476	1.55679	20.1316	25.7624	2.22256	3.70006	0.785568	4.6195	0.115558	1.68428	1.52572	26.3062	0.518361	0	54.4913	11.5452	0.688896	35.1246	1.32703	1.66776	0.257752	47.3129	1.59338	0.254877	55.25	0.108378
NOCLEBFK_00706	37.7137	0	100.922	0	16.1627	0	2.51467	0	0.151833	0	0	0	0	0	0	0	0	0	0	90.2681	0	0	3.94795	20.033	56.0934	24.9015	0	0	0	0	0	0.208708	0.233996	0	0	0	0	0	0	0	0	0	0	0	0	0	0	4.84612	0.19574
NOCLEBFK_00707	151.38	4.31786	145.278	19.0086	0	26.6167	0	0.12549	70.3388	0	0	0	0	0	0	0.097846	0	5.28251	0.159026	0	0	29.2476	0	0	44.7757	0	0	0	0	0	0	0.16786	0	0	0	0	0	0	0.122412	0	0.114399	0.120478	1.93807	0.249607	0	0	0	0	0
NOCLEBFK_00708	69.5201	0	81.9078	20.5142	18.0727	0	25.9118	0.406291	53.7698	0	0	0.087722	0	0	0	0	0	31.4691	0	0	0	26.1327	0	3.75589	0	3.73939	0	5.06551	0	0.0821	0	0	0	0	0.11644	0	0	0.145816	0	0	0.148152	0	0	0.080813	0	0	0	0	0.10194
NOCLEBFK_00709	55.1627	79.1608	0.34467	21.3126	16.3448	86.5744	60.0972	202.165	118.819	0.101405	0	52.2923	0.179059	0	0.123674	0.097846	0.227554	38.6944	85.5558	186.03	55.5553	65.1424	1.94044	59.2927	58.0049	1.10583	0.332152	61.2171	54.5739	0	0	0.16786	0	0	1.52849	81.1954	0	0.112595	0.244825	0.166782	33.7477	0	0	0.124803	0	0	3.82575	0.177166	0.314859
NOCLEBFK_00710	156.04	176.908	398.784	21.3287	61.0408	0	26.3988	224.488	0.469788	205.783	0.720733	0	0	0	0	0.188209	0	1.01611	63.3194	47.1834	194.014	102.836	0.339318	0	80.255	0	0.212968	62.101	0.198815	0	0.253087	0.322883	0.72401	0.185349	14.0087	200.84	0	62.5913	0	0	0	56.3133	0	0	0	0	0	0	0.302821
NOCLEBFK_00711	73.5835	83.9215	260.567	18.7996	56.0926	73.3293	60.6593	107.59	43.4576	83.8214	0.58793	0	26.6352	1.34912	0.31049	1.41247	0.142822	15.5829	57.8902	50.4236	93.3705	78.315	37.4226	22.9556	52.0189	0.925417	45.3774	32.8109	1.23258	0.557051	1.40388	0	1.53557	43.1213	29.1188	52.6155	0.872757	101.904	13.9064	35.2767	33.1722	2.19288	0.101367	5.87486	60.3617	17.6617	4.57001	5.44861	1.0869
NOCLEBFK_00712	1.64763	0	0	61.6647	0	0.545343	0	0	0	0	0	0	0	0	0	0	0	0	0	0	0	0	0	0	0	0	0	0	0	0	0	0	0	0	0	0	0	0	0	0	0	0	0	0	0	0	0	0	0
NOCLEBFK_00713	83.8969	35.1496	13.1967	5.46396	34.0913	47.7417	28.5034	6.31979	1.60065	18.1188	3.23114	15.888	4.19996	9.94413	7.76405	6.14262	21.3498	11.3883	15.0299	6.81435	64.3027	2.29286	18.8629	23.1199	17.7069	2.11912	5.04115	5.82511	57.0441	13.4703	5.90002	6.48491	5.06349	26.0584	5.27233	63.3735	10.936	14.0594	9.03606	7.7089	3.23576	16.3735	10.2505	1.63587	6.6193	12.6899	2.04332	2.38333	12.5984
NOCLEBFK_00714	9.52994	0	0	19.2337	31.9896	1.29039	0	0	0	0	178.322	0	0	0	0	0	0	0	29.7848	0	2.27438	0	23.0194	0	0	0	0	10.2941	0	0	0	0	0	0	0	0	0	0.864283	0	0	0	0	0	0	0	0	0	0.271987	0
NOCLEBFK_00715	504.134	757.855	806.941	397.423	182.64	945.427	215.141	450.153	407.739	846.364	388.241	0.533729	0.352725	0.249076	0	0.192745	0	311.137	321.406	49.2932	77.822	328.102	256.451	101.247	273.963	321.428	63.9033	43.0505	318.236	0	0.777556	0.330663	0.370728	301.997	210.589	286.764	0.821759	203.389	103.207	123.86	234.592	335.105	130.122	0.491695	17.3625	0.239966	1.94484	0.174498	0.310118
NOCLEBFK_00716	994.178	1288.4	1024.93	999.473	466.884	1237.98	1914.4	2469.3	2420.38	744.014	2550.81	1.66123	766.305	1.03367	2.02207	1.19983	1.39519	974.351	915.225	1647.97	2190.59	983.179	1521.42	1072.83	1123.54	908.035	79.1976	748.137	634.991	3.10954	1.07562	0.686126	1.53852	464.37	661.155	2173.42	1.70515	227.354	146.606	1116.66	592.457	2.46226	134.672	1.5304	7.75267	1084.99	351.093	0.724165	639.633
NOCLEBFK_00717	114.141	0	0.242903	122.798	0.40417	37.9107	55.5883	185.013	0	0.142929	6.07342	7.63784	0	0	0	0.137912	0	225.974	17.9315	218.118	39.6741	2.81073	149.929	41.786	15.1402	75.8543	7.1785	10.5012	1.01978	0.714837	2.22542	0	0.530525	0.271633	0	18.7496	0.195994	0.1587	0.517615	94.9707	0	18.6792	0	0.351816	35.5396	0.3434	2.78314	0	0.221894
NOCLEBFK_00718	161.467	0	0	0	0	4.25367	0	0	0	0	0	0	0	0	0	0	0	0	0	0	0	0.221799	0	91.0728	0	0	0	0	0	0	0	0	0	0	0	0	0	0	0	0	0	0	0	0	0	0	0	0	0
NOCLEBFK_00719	327.072	461.361	215.053	236.081	154.737	483.355	107.19	228.363	268.421	240.146	0	91.5787	86.9097	0	0.181351	0	0	187.262	146.677	234.887	530.243	176.425	146.667	105.137	216.869	102.879	107.315	174.617	136.71	5.39173	39.9378	0	0	20.9121	24.9183	11.7774	0.203904	187.229	0.359003	144.781	113.232	17.4898	51.8651	0.549023	15.0513	107.892	78.9013	0.129895	0.23085
NOCLEBFK_00720	11.8058	0	0	0	0	0	0	0	0	0.130549	0.24119	0	0	0	0	0	0	0.170018	0	118.476	89.323	0	0	0	0	0	0	0	0	0	0	0	0	0	0	0	0.179018	0	0.157594	0	0	0	0	0	0	0	0	0	0
NOCLEBFK_00724	0	0	0	0	0	0	0	0	0	0	0	0	0	0	0	0	0	0	0	0	0	0	0	0	0	0	0	0	0	0	0	0	0	0	0.160661	0	0	0	0	0	0	0	0	0	0	0	0	0	0
NOCLEBFK_00725	173.133	186.025	26.286	47.6289	25.2707	62.7528	43.1422	72.601	99.9279	11.017	0.100266	31.3214	0	0.06767	0	0.052366	0.060892	7.35055	46.3842	123.614	146.152	68.6596	19.5427	20.2641	61.6029	33.7999	21.2132	0.199367	0	0.135714	0.070417	0	0.402886	27.1775	23.8191	182.215	0.14884	2.47063	1.17925	0.446298	8.02048	0	46.1569	0.066793	18.7491	0.065195	0	0	0.084255
NOCLEBFK_00726	503.888	680.397	874.38	338.442	224.643	227.998	372.311	1346.11	1627.73	190.932	847.043	156.97	381.259	1.32158	1.10798	166.406	1.18921	140.005	203.732	1540.27	303.237	740.281	234.95	273.778	1276.86	583.964	129.94	1.66868	5.09294	2.08249	1.76814	24.0614	70.5331	953.34	158.014	1042.41	1.03814	911.55	1928.7	4823.22	711.274	233.499	383.915	2.6089	3469.56	1.45514	6.63378	1.19041	1.64546
NOCLEBFK_00727	723.989	0.627529	0.75138	148.803	419.245	133.762	239.349	31.734	0.532426	0	0.816831	12.4039	0	1.65387	0	0	0	153.161	108.856	306.491	404.778	0	3.07648	0.70249	60.1441	3.75	0.482728	0.541393	0.901296	0.552807	360.834	0	0	2.52075	425.335	0	0	298.475	12.2755	0	1292.84	222.194	206.321	0	0	1.06225	0.538073	0.386221	0
NOCLEBFK_00728	185.108	512.244	664.316	610.404	285.972	344.992	477.299	637.155	554.574	431.21	4.57561	4.59538	343.297	14.0682	1.84587	0.531047	0.308756	289.569	349.769	264.029	299.007	126.011	123.027	227.799	268.329	141.375	86.0798	36.8978	61.8472	5.50513	8.03367	0.911039	0.255356	277.178	188.606	355.88	1.69807	319.908	166.095	551.712	71.4021	184.557	26.5158	0.846695	578.583	108.264	121.234	5.28851	142.263
NOCLEBFK_00729	59.7347	83.2539	0.898064	117.067	13.9468	113.701	42.3465	200.763	26.4092	158.003	0	0	0	0	0	0.254945	0.296455	30.1087	89.9148	34.3161	127.866	42.4334	40.2179	117.338	152.167	175.761	39.8106	4.52958	0.269312	0.330363	0	0	0.490365	49.7121	64.6588	0.326987	0	10.7082	0	41.9353	41.7306	15.3818	229.345	0	51.745	92.5238	85.3735	41.8919	48.403
NOCLEBFK_00730	155.571	172.43	289.096	13.7256	95.87	103.532	122.019	99.1841	38.6785	0	0	108.067	0.525134	0	0	0	0.166839	0.580958	6.29613	12.7945	272.091	69.066	57.4253	43.945	15.917	0	0.487058	0	36.072	0	0	0.984576	0	0.141298	8.96533	0.736088	0	108.144	0	0	0	0	91.6521	0	0.163602	0	0	0	0
NOCLEBFK_00731	63.9419	3.43329	168.718	87.1655	18.0505	130.743	0	45.5256	161.67	0	0	0.134649	0.177971	0.251348	0.122922	0	0.226171	50.2725	44.2565	14.2356	18.4059	33.2226	23.3191	59.8931	50.6845	79.5022	0	0.370254	38.216	0.12602	1.17697	0.166839	0	0.095773	0	8.98072	0	49.9119	0	0	40.7059	25.9847	0	0.124045	23.8416	0	0	0.088044	0
NOCLEBFK_00732	223.82	0	0	0	7.2035	2.32623	2.95249	1.12206	52.8786	0	0	0	0	0	0	0	0	0	70.8925	0	90.5175	0	22.0822	0	0	0	0	0	0	0.161955	0	0	0	12.1853	0	0	0	0.143822	2.65817	0	0	30.6244	0	0	12.5411	0	0	0	0
NOCLEBFK_00733	86.2214	84.0712	80.0992	95.2232	37.1793	170.952	52.8592	89.5167	94.9189	92.3918	0.123513	29.0269	53.8305	0.08336	0.16307	0	0.150021	2.7861	73.9133	0.21707	130.064	6.26045	32.6798	14.4464	40.0302	15.553	0.583945	0.245592	48.1766	1.67179	0	0.221331	0.744446	45.4854	63.8405	405.571	31.9945	226.701	76.3454	3.29865	0.07542	79.3483	160.78	1.64559	132.987	1014.33	1035.49	64.4741	2019.84
NOCLEBFK_00734	285.451	1191.98	770.164	352.844	338.822	648.64	474.367	463.928	768.967	172.245	63.8149	0	446.462	0	0	0.888767	1.29184	302.891	173.338	1060.59	252.033	364.212	293.227	54.5161	332.508	303.571	143.31	323.708	145.756	0.575841	75.2933	1.14354	1.70947	132.383	145.78	582.781	0	83.0972	1.66787	0.378733	0	106.698	9.90233	0.850223	98.0484	0.553256	0.280246	0.201157	0
NOCLEBFK_00735	331.141	117.209	473.315	155.531	6.76208	160.551	116.737	3.74842	198.892	21.5217	0.589061	0.212978	0.281502	0.198782	0	0	0	57.3025	66.7518	126.301	114.9	64.9401	2.21861	121.838	232.331	15.2601	0	3.70906	0	0.199329	0	0	0	2.87826	1.97891	0	0.437218	0.708047	0	118.514	0.359697	0.189405	0	0	0	0	0	0	0.247498
NOCLEBFK_00736	84.3379	0	453.469	15.4512	0.488373	5.01034	400.063	2.56471	384.969	0	0	0	0	0	0	0	0.58133	2.69903	156.004	0	0	44.637	0	4.93938	0	0	101.825	0	4.22483	0	0	0	0	0	196.619	10.2592	0	10.9305	0	0	0	0	0	0	0	0	0.630554	0	0
NOCLEBFK_00737	1129.96	747.387	1952.84	788.591	821.821	1326.62	1544.43	1658.92	797.574	1120.35	2.45049	0	1096.1	0.551289	0	0.853216	0	762.926	916.611	1015.66	1605.12	899.675	403.019	389.179	547.706	219.107	89.7874	864.063	503.374	119.959	3.44198	1.46374	1.64109	425.167	721.697	1648.04	1.21255	633.277	299.416	490.839	314.231	1010.64	992.874	1.63243	87.0731	1.06225	1.61422	0.772443	10.2959
NOCLEBFK_00738	166.081	111.863	21.4345	28.6741	27.5721	1.06342	0.927927	58.622	80.4344	6.57267	0.109397	1.18659	1.46381	1.18133	2.45537	0.057135	0	2303.51	437.648	45.1816	0.144179	83.8954	3496.47	245.84	24.1651	49.2904	17.8437	6096.76	235.202	3290.56	2453.18	122.719	10.44	8.49629	42.8415	78.703	0.081198	21.1706	0.07148	2.33733	15.2974	1.47736	0	0	1.69386	1.56492	1.44127	0.103452	0.091928
NOCLEBFK_00739	71.0214	71.2163	91.389	0	0	0	4.35104	19.3028	0	0	0	0	0	0	0.133031	0	0.244771	0	0	146.802	0	25.3318	0	6.0659	30.8926	0	0	0	0	0	0	0	0	46.9532	0	68.3049	0	0	0	0	0.984434	0	1.21608	0.134246	41.1635	0	0	0.285855	0
NOCLEBFK_00740	117.61	215.507	0	17.3487	75.4664	0.301374	66.5088	58.5834	350.718	0.763539	350.042	0	0	0	0.133031	0.210497	0	59.9469	0.171057	41.0834	71.0462	0.408577	71.346	53.8999	50.7174	0.132166	1.19094	0	0.222359	0	0	0	0	16.1693	17.8921	51.1612	0	1.21113	0.131674	1.6146	31.6249	58.8351	0.34745	0.268491	0	0.131034	0	0.095285	0.16934
NOCLEBFK_00741	0	0	0	0.283671	0.188288	0	0	0.247201	0	0	0	0	0	0	0	0	0	0	0	0	0	0	0	1.58695	0	0.242039	0	0	0	0	0	0	0	0	0	0	0	0	0	1.6427	0	0.237326	0	0	0.219778	0	0.729316	0	0
NOCLEBFK_00742	76.1648	0	1.6894	38.1152	0.401574	0	24.2775	0	0	0	0	0.09486	0.12538	0	0	0	0	0	13.1395	48.5307	0	8.24503	0.12352	0	17.1014	34.5862	8.91548	0.086947	0	0.088781	0.09213	0	0	48.2425	66.8605	0.26362	0	0	0.428575	75.325	86.5922	101.654	0	0	6.79664	0	0	0	0
NOCLEBFK_00743	93.8309	0.199427	135.153	26.5377	0	35.5212	101.886	0	0	0	0	0	0	0	0.171362	0	0	0	0	0	0	43.4199	7.08829	0	0.156669	0.170248	0.306819	0	73.1826	0	0	0	0	0.534058	63.9098	0.869426	0	46.6471	33.2443	0.231092	0.158511	0	0	0	0	0	0	0	0
NOCLEBFK_00744	137.419	43.5599	504.184	0	4.98764	0	33.1684	217.4	61.5972	0.35276	0	0	0	0	0	0.340379	0.395799	0	0	0	108.656	0	0.61366	0	0.393339	0.427431	0	0	0	0	0	0	0.65469	0	0	3.05594	0	0	0	0	126.552	0	0	0	0.388118	0	0	25.885	0
NOCLEBFK_00745	209.292	111.994	0.147522	19.107	32.8105	93.5363	0.618323	139.219	93.8714	8.42006	0	0	0	0	0	0	0.097396	91.9084	65.6143	41.291	136.329	25.9307	0.151005	19.5851	18.9709	33.5522	48.2412	0	21.1462	0.108535	0.11263	0	0.161102	53.4505	40.2532	124.83	0.238066	13.7828	0.104788	0.142769	0.097928	0	0.138252	0.213669	48.6123	182.383	180.332	0.075829	525.98
NOCLEBFK_00747	386.238	120.493	0	0	0.235006	0	0	0	0	0	0	0	0	0	0	0	0	28.2485	1.36846	0	0	0	45.7569	0	0	0	0	0	0	0.155867	0	0	0	0	0	0	0	4.5677	0	0	0	0.148106	0	0	0	0	0	0	0
NOCLEBFK_00749	556.442	8.32683	286.536	118.448	8.17461	5.28563	37.0652	0.315657	0	0.255072	0	174.472	0	0	0	0	0.286193	80.7218	0.400011	32.7141	0	0	164.178	95.6467	103.811	21.6346	0	118.065	29.1188	0	26.1458	0	0	136.46	142.029	277.473	0	0	153.649	0.83904	98.9886	0.303047	0	0.313928	0	0.306419	0	0	0
NOCLEBFK_00750	211.132	334.512	176.587	284.07	227.241	220.986	482.401	236.588	280.694	0.540056	65.2534	0.144298	0.572174	0	0	0.20844	0.484758	85.3844	243.577	325.981	155.695	213.722	164.972	109.492	277.364	116.348	76.8906	65.4698	32.8078	0.135051	0	0.35759	0.400918	60.2476	72.3054	344.47	0.444339	28.0636	19.5581	0.177647	36.19	64.1631	52.1243	0.265868	0	92.6442	0	0.377415	31.3572
NOCLEBFK_00751	346.883	70.2973	253.232	20.6954	38.6219	79.363	47.3903	171.983	391.944	53.9633	0.195103	0	0	0.263355	0	0.101897	0.236975	50.4736	32.4595	248.079	197.994	35.403	38.3948	0.503376	88.7844	4.09463	46.8123	20.3022	112.267	0	0	0.349618	0.58797	10.2355	26.3111	189.371	0	26.4999	0	0.173687	0	0.125465	0.67277	0	67.9702	0.126861	0	0.276751	0.327895
NOCLEBFK_00752	89.6475	51.3703	65.7754	23.619	33.8194	0.722536	3.27848	91.7794	85.6584	0.209208	2.31908	0	71.482	0.130431	0	0	0.821565	39.6426	1.80446	80.6651	101.881	12.4403	54.2266	41.551	137.048	35.1087	68.6403	11.2719	23.3498	0.261581	1.22152	3.80941	0	17.7924	20.4045	127.771	0.143441	64.6936	0.252548	1.37634	6.37242	0.248556	0.166601	1.41614	1.95651	0.879625	0.254609	0.365509	0
NOCLEBFK_00753	391.834	591.846	579.373	146.654	144.022	308.685	331.914	277.994	164.426	50.7144	127.33	329.64	157.862	50.1295	42.6881	14.6385	27.7215	197.294	162.802	275.148	391.564	172.409	214.901	165.636	99.6844	181.722	157.36	62.8971	170.539	24.2531	15.8882	17.5792	26.1448	171.757	277.484	292.757	12.6307	313.558	68.9386	120.482	87.531	76.2174	37.6245	16.5377	142.833	79.799	31.7832	16.0926	35.8338
NOCLEBFK_00755	219.494	279.884	195.945	160.45	27.8722	257.034	259.776	296.735	235.196	2810.95	70.817	80.2268	29.4374	0	0	0.352245	0.273065	177.968	81.5802	108.951	124.74	165.629	107.642	127.028	138.94	84.7804	39.9247	19.5945	33.6126	0.152149	0.236833	0.402863	0.564595	67.5862	46.664	357.887	0.750891	110.861	18.2884	21.815	19.219	0.144573	10.078	0.524174	0	0.073091	0.296187	0.372048	0.283373
NOCLEBFK_00756	135.849	114.958	61.8689	106.202	152.156	337.231	291.48	95.5164	64.231	0.423312	0	0	0	0	0.344182	0	0.15832	266.641	42.4863	398.825	13.5712	89.4557	68.7299	166.356	21.7123	33.8525	36.8209	124.06	53.7901	0.352856	0	0	0.261876	528.822	91.9563	5.76263	0.193492	79.9038	139.164	260.388	71.4741	79.7982	187.653	86.6576	145.001	0.508525	0	39.3206	0
NOCLEBFK_00757	102.315	0	0	0	0	0	0.144908	5.41264	0	0	0	0	0	0	0	0	0	0	0	0	0	0	0	0	0	0	0.111057	0	0	0	0	0	0	0	0.541123	0	0	0	0	0	0	0.241694	0	0	0.111911	0	0	0	0
NOCLEBFK_00758	109.029	336.112	51.6423	89.4851	80.6019	37.413	101.163	81.411	228.164	123.362	1.18191	1.13954	341.524	2.92484	6.37179	0	0	152.604	112.196	7.2701	239.365	155.459	29.1202	19.4822	116.747	87.7209	66.4721	37.9933	0.434709	0.399941	2.35183	0.176496	2.57245	27.3554	95.0097	79.6987	0.292416	24.8613	0.25742	15.6072	1.5637	6.33379	0.509445	0.393672	11.2617	2.81787	0.519042	0	0
NOCLEBFK_00759	150.424	10.9615	4.06245	58.84	8.20394	30.9908	13.7965	16.308	0.073811	155.255	0	0.081884	0.10823	0.076426	0.074753	0.059142	0	28.8163	15.6677	50.3506	29.4754	30.6501	5.97099	46.8435	18.4528	20.572	72.0077	0	0	0.076637	0	0	0.113754	19.9191	1.08691	2.73074	0.084049	80.1703	13.6883	24.5974	0	46.2413	33.5813	0	0.067436	0.220893	0.074594	0	0
NOCLEBFK_00760	86.6411	0	2.74895	82.6936	0	0	0	0	0	0	0	0	0	0	0	0	0	0	0	0	292.438	0	69.6429	0	0	0	0	0	0	0	0	0	0	0	0	0	0	0	0	0	0.456201	0	0	0	0	0	0	0	0
NOCLEBFK_00761	178.922	64.435	63.7898	82.1395	59.6761	66.5881	72.0774	275.91	166.973	1.57251	40.6731	0.091339	21.7308	0.170502	0.250153	0	0.153423	168.375	57.7912	181.812	185.703	89.8902	63.9876	97.9864	111.684	131.719	28.7397	62.8741	42.858	0.170971	0.266132	0.452702	0	38.5259	27.0368	144.687	0.093754	102.712	0.165068	102.666	74.1228	23.2315	25.5895	0.084146	75.9	0.082133	19.8033	0.179175	6.05017
NOCLEBFK_00763	141.001	2.25989	0.235296	6.88155	31.3864	27.0645	0.197244	10.1946	0	0	4.60427	13.4101	0	0	0.084429	0	0	0	0	49.675	60.0074	0.129653	2.64937	2.52984	0.231569	2.01312	6.0467	0.254308	0.070561	0	0.089822	0	0.256956	4.27581	14.2402	0	0	36.3572	0	0	0	0	0	0.255599	0	0	0	0	0
NOCLEBFK_00765	180.773	0	104.285	32.374	47.903	53.1531	57.8945	85.9736	54.0383	90.5576	458.302	0.240758	55.6884	0	0.109895	0.086945	0.101101	0	19.0766	115.42	136.688	58.7285	16.6155	53.8321	11.5543	24.784	5.80454	0.110338	0.45922	0.225329	0.116915	0.298316	0.167231	29.112	36.9909	74.3794	0	16.2081	0.217548	18.2286	0.101653	0	0	0.110899	25.0822	10.8246	0.219323	0	0
NOCLEBFK_00766	150.56	0	336.374	42.709	0	55.3967	0.732402	0	207.398	0	0	0	0	0	0	0	0	0	0	52.1641	0	0	58.1312	0	57.0372	0	0	6.92479	0	0	0	0	0.477061	41.0355	0	0	0.704971	1.71249	0	0	0	0	0	0	0.282815	0	0	0	0
NOCLEBFK_00767	158.966	19.2795	6.4501	62.975	40.6703	30.6312	30.4498	36.5857	12.0277	4.59438	14.393	21.3491	17.2835	8.71767	16.3227	4.62587	4.9308	17.1697	21.3018	11.0261	111.626	8.60472	14.9422	13.3304	6.45929	9.92361	7.8516	18.3454	11.6055	14.4862	17.3654	6.61327	5.93165	19.1714	26.7443	15.327	3.83487	10.2027	6.993	24.3119	10.5916	18.2741	6.0448	7.37543	6.37356	13.1982	28.6864	5.06043	10.544
NOCLEBFK_00768	179.574	0.168691	0	44.8953	0.560141	0.164189	40.9751	0	58.8245	1.54506	0	0.793897	0.209865	0.889176	0.289902	0.11468	0	100.609	0	0	0	3.78409	0	0	0	8.64054	49.7002	0	1.33256	0	1.23368	0	0.220577	51.6122	3.05602	0.147086	0	56.8772	0.717364	0	1.07265	0.988434	90.1029	0	0	0	0	0	0.369029
NOCLEBFK_00769	259.021	0	30.2313	0	0	25.5289	0	0.213726	0	3.79952	0	0	0.304961	0	0	0	0	0	8.12522	0	0	0.97037	44.7652	0	0	23.6467	1.50853	0	0	0	0	0	0	0	2.45008	0	0	62.1311	0	0.28405	0.779343	0	0	0	0.380033	0.207471	0	0	0
NOCLEBFK_00770	70.3348	135.33	0.923828	1.38952	56.4655	25.683	77.9071	69.1547	102.514	55.8818	0	0	0.191975	0	0	0.104904	0	82.5461	13.4692	54.8924	11.6478	13.4388	29.1257	22.4566	149.714	0	63.269	0	0.110815	0	0	0	0	16.9428	0	0	0	32.8348	0.262485	0	0	0	0.346311	0.133806	0.119617	0	0.132313	0.094972	0.168785
NOCLEBFK_00771	911.961	0	81.0081	193.403	78.9768	15.1333	167.449	37.7379	311.968	0.296066	0	0.395531	164.679	0.369167	0	0	0	17.7365	86.8238	0.96131	9.0112	0	0	107.255	25.7497	0.358737	76.2883	0.36254	24.1419	100.32	0.38415	0	0	0.562668	46.7266	321.7	0	0.328736	0	0	0.334004	0	0	0	0.325742	119.503	1.80158	0	0.919277
NOCLEBFK_00772	521.184	0.424006	4.5692	100.967	114.605	387.93	0	0.739376	0.719495	0	0.551913	0.399094	0.527499	0.372492	0.364336	0	0	0.778099	153.193	365.679	0	290.377	0	0	0	0	0.326168	0	0.608984	0.373518	0.38761	0	0	256.617	0	0	0.819291	65.6761	246.304	240.752	62.6845	8.87301	54.7156	0	239.934	331.236	15.6332	0	283.833
NOCLEBFK_00773	463.967	127.849	188.822	128.074	73.682	189.23	149.329	189.341	154.368	54.4682	38.5459	0.445968	0.589454	0.069374	0.135709	0	0.062425	84.0504	147.105	13.91	93.4068	70.3876	130.079	130.833	95.5985	103.345	8.26145	75.7587	72.0772	24.0694	13.4994	0.184195	0.103256	79.1965	52.5864	170.276	0.305172	111.567	22.3651	46.4851	217.798	88.9058	5.22808	0.136949	0.612133	35.6906	120.999	0.145805	54.2435
NOCLEBFK_00774	276.801	555.141	271.562	0.370783	62.2656	0	112.706	247.828	0.943274	0	0	0	0	0	0.318436	0	0	135.334	0	0	259.068	0.97801	218.018	0	176.426	67.386	0	0.31972	0.266131	0	0	0	0.484574	17.6155	0	13.2481	0	1.15964	0	0	0	0	0	0	176.67	94.4107	0.635519	0.228083	20.2675
NOCLEBFK_00775	50.2227	149.537	0.128076	61.4303	93.6965	0.104111	40.1539	19.8648	65.7062	10.9275	0.139233	0.302042	1.06459	0.09397	0.091912	0.072717	0.253671	0	20.3278	94.5754	36.4249	93.1555	23.2047	29.3369	35.7974	0.091315	23.8621	19.564	0.230445	0.094228	1.27119	0	0.979059	134.488	66.1523	56.3325	0.206685	0	1.18267	51.191	26.7811	38.1426	27.9666	0.185503	2.90207	17.4728	0.091717	0.855831	0.116999
NOCLEBFK_00776	138.401	93.3672	221.764	0	0.126542	56.5655	59.2889	8.80516	156.009	0.268497	0	0	0	0	0	0	0.150628	72.2073	29.2639	0.435898	4.24949	17.6002	0.233538	111.133	92.3598	131.434	0.58631	12.9869	0	71.5068	0	0.222227	0	0	39.8759	5.81495	0.184092	98.8284	0	0	0.151451	0.159499	0.213815	0.330451	0	0	0	0	0.208419
NOCLEBFK_00777	57.9923	0	0	0	0	0	0	1.41501	0	0	0	0	0	0	0	0	0	72.1547	0	0	0	0	0	0	24.6879	0	0	0	5.82735	0	0	0	0	0	0	0	0	0	0	0	0	0	0	0	0.114367	0	0	0	0
NOCLEBFK_00778	123.851	0	0	0	0	0	136.269	0	0	0	0	0	0	0	0	0	0	0	0	0	0	0	0	0	0	0	0	0	0	0	0.33096	0	0	0	0	0	0	0	0	0	0	0	0	0	0	0	0	0	0
NOCLEBFK_00779	164.871	108.017	10.3931	39.1769	68.148	71.7171	0.387212	87.2842	3.27311	655.306	0.50215	0	0	0	0	0	0	0	24.722	0	0	4.32689	8.98357	0	7.72814	88.9197	0.890277	0.499235	0	0	0.176331	0	0.252217	58.2408	52.4157	104.106	0.186355	0	0.164053	0	0.153313	0	0	0.167257	25.1195	0.163256	0	0	0.421963
NOCLEBFK_00780	159.597	94.511	24.9783	44.5441	25.3426	63.5133	45.0694	61.1094	119.688	321.198	0.165574	0	0	0.111748	0	0	0	41.0836	98.2405	45.9766	3.92791	84.0078	4.20937	13.5277	54.5614	57.8788	2.15271	105.572	93.9053	0.112055	0	0.148352	0	44.3687	48.8692	55.3444	0	13.2347	0.324559	0.147399	16.2777	24.1701	0	0.110299	25.5382	0.107661	0.109069	0.078288	0.139134
NOCLEBFK_00781	64.276	31.2002	80.7311	26.587	59.0876	0.128676	17.6486	165.064	14.8062	7.35841	0	0	0	0	0.113599	0.179751	0	12.3731	73.9121	28.4289	47.7411	75.7106	24.4671	39.367	126.085	0	7.32228	2.73738	3.3229	0	24.5338	0	0.172868	0	20.9771	13.2563	0	8.27381	0.112441	0	18.389	2.65592	107.405	0	0	10.9657	1.13358	7.32302	65.3616
NOCLEBFK_00782	124.206	67.4531	3.65043	0	0	16.8769	0.765019	10.4665	1.61668	0	0	0	0	0	0	0	0	20.1061	20.2111	0	7.68177	0	0.467077	29.0097	0.149692	0	10.5536	2.79464	0	0	0.174189	0	0	81.7714	0	0	0	0	0	0	0.151451	19.2993	0	0	0.147705	0	0	0	0
NOCLEBFK_00783	7.68893	0	0	0	0	0	0	0	0	0	0	0	0	0	0	0	0	0	0	0	0	0	0	0	0	0	0	0	0	0	0	0	0	0	0	0	0	0	0	0	0	0	0	0	0	0	0	0	0
NOCLEBFK_00784	31.2349	5.19978	0	17.0749	11.0679	115.236	14.5868	209.943	69.0042	0	0	0	0	1.87407	0	0	0	92.9751	35.9443	0	63.3571	53.3951	40.5259	0	0.209484	50.65	22.2561	18.5193	8.52146	0	0.975065	0	0	0.089262	39.8121	70.3324	0	11.4732	0.226793	0	0	1.33925	0	0.231222	38.5502	0	0	0.082058	0.145834
NOCLEBFK_00785	151.248	1.19151	0	0	4.35208	0	1.79392	0.779153	158.717	0.419739	0	0	0	0	0	0	0	102.768	27.6463	4.08861	0	42.6471	3.2858	0	12.4026	37.8899	0	1.02796	0	0	0	0	0	3.98853	0	5.714	0	0	0	0	0	0	0	0	0	0	0	0	0
NOCLEBFK_00786	225.555	352.136	44.2985	3.51957	51.8783	43.3295	15.4625	373.76	349.713	116.656	0	2.626	0.301817	0	0.521151	1.15448	0.383558	67.0028	78.6722	82.5537	156.486	152.538	33.4508	70.0679	193.922	28.477	43.2029	87.488	91.1168	83.3485	85.4951	0	0	38.5747	0.833534	131.149	0.234385	72.4033	0.515836	0.140561	17.258	27.821	33.2119	0.105182	40.6204	0.51333	0.520045	0.149312	0.398037
NOCLEBFK_00787	0	0	0	0	0	0	0	0	0	0	0	0	0	0	0	0	0	0	0	0	0	0	0	0	0	0	0	0	0	0	0	0	0	0	0	0	0	0	0	0	0	0	0	0	0	0	0	0	0
NOCLEBFK_00788	91.4939	0	7.8706	3.15683	0.349227	1.53549	0	0.229248	0	0.740993	0	0.247483	0	0.230987	0	0.178746	0	0.482508	2.6146	0	0	0	0	0	32.8427	0	0	1.1342	0.377638	0.231623	0	0	0	0	0	0.229257	0	7.61052	2.23625	6.70295	0.208986	42.4774	0.295041	0	34.445	0.667616	0	0.323649	0
NOCLEBFK_00789	258.963	0	0	11.9293	0.416745	0	0	0	0	0	0	0	0	0	0	0	0	0	0	0	0	0	0	157.358	0	0	0	0.541393	0	0	0	0	0	0	0	0	0	0	0	0	0	0	0	0	0	0	0	0	0
NOCLEBFK_00790	717.633	874.059	1024.2	825.934	1153.49	762.753	1756.12	1764.52	1956.67	1738.5	1007.42	0	711.923	0.656296	0	1.01573	0.590558	610.067	609.985	516.117	1140.62	762.002	553.034	323.647	124.42	718.111	337.335	91.5212	745.715	2.63241	2.73173	2.61381	0	1281.88	313.611	819.436	1.44351	293.963	35.5812	90.0303	2441.05	1710.92	1086.43	49.8798	449.38	783.41	1443.83	1.37936	728.067
NOCLEBFK_00791	458.064	181.082	222.017	97.6855	357.004	530.213	401.539	251.596	405.692	104.182	0.217242	188.508	1.2458	0.146619	0.143409	0	0.131933	141.498	124.656	256.568	233.918	124.978	78.3439	160.489	75.9144	38.3263	18.6158	35.5649	0.35956	0.441069	56.4509	0.583937	0.21823	171.514	44.2058	1184.69	0.48373	305.384	50.6749	0	1.06123	44.4255	111.618	0.289438	0.258746	0.141257	0	0.205437	0
NOCLEBFK_00792	154.701	0.470647	106.508	47.4034	53.6559	145.519	120.619	97.3906	7.45396	0	0	77.5241	13.6622	0.137822	0	0	0.124017	0.143948	62.7484	15.9706	107.923	19.1486	14.9978	0.175622	37.7133	37.6339	3.3791	15.159	0.112662	0	0	0	0.205136	38.9666	1.07804	3.9669	44.7128	106.16	0	0.181792	0	71.1757	0	0.136036	0.243221	0	0	0.289666	0
NOCLEBFK_00793	439.516	1419.57	789.71	251.992	311.714	541.658	163.425	452.498	622.183	12.0987	0	174.205	0.791249	1.11748	0	0.432373	1.00554	375.238	313.414	326.638	578.275	507.739	335.97	207.899	100.429	116.192	26.4196	0	244.811	0.560277	0.581416	0.741758	0	393.868	632.122	381.532	0.614468	80.6025	0.540931	0.736995	208.274	138.419	0.713681	0	64.092	0	0.545344	0.391441	0.695669
NOCLEBFK_00794	98.8576	0	0	0	11.1628	0	0	0	0	306.555	0	0	0	0	0	0	0	0	86.4921	413.638	0.41194	0.950566	0	89.2449	76.2114	0	0	0	196.584	0	0	0	0	0	0	0	0	0	0	0.556506	0	0	0	0	0	0	0.823581	0	0
NOCLEBFK_00795	54.1957	0	0.547121	28.8023	0	0	1.83456	23.9041	0	180.928	0	0	0	0	0	0	0	0.419267	75.2253	5.22654	0	92.2511	92.9664	0	0.35897	0	70.6517	0	0	0	0	0	0	0	0	0	0.441463	0	10.1044	0	0	0	0	0	0	0	0	0	0
NOCLEBFK_00796	419.513	323.295	7.90002	0.440088	155.111	393.014	103.31	173.346	331.025	543.567	0.572545	0	0	0	0	0	0	23.812	281.877	1.00623	111.301	200.531	127.767	153.629	437.812	79.606	0.676722	0	0.947624	0	0	0	0.575148	70.3808	32.9731	413.821	0	357.173	0.748203	1.0194	0.349612	0.368188	6.41646	0	0	117.27	0	0.270716	98.629
NOCLEBFK_00797	247.684	0	0	0	27.1567	0	0	0	0	0.271799	0	0	0	0	0	0	0	0	20.4596	0	0.330903	0	23.641	83.3487	0	113.29	42.4366	0	0	0	0	0	0	0	0	259.004	0	0	0	0	0	0.645839	0	0	0	0	0	0	0
NOCLEBFK_00798	284.868	102.874	158.898	59.6981	415.037	216.528	198.511	211.904	144.453	228.13	0.669534	0.484147	0.639917	0.225938	0.220991	44.7589	0.203307	9.67522	69.3352	124.14	56.6947	63.6308	0.630426	14.6832	60.8149	484.777	0.197839	0	107.491	0	0	0	0	60.2639	4.65918	234.561	0	0	6.12464	45.597	0.408836	10.1181	0	0.446019	4.58531	0	0.661565	0	0
NOCLEBFK_00799	63.2269	0	0	0	0	0	0	0	0	0	0	0	0	0	0	0	0	0	0	0	0	0	0	0	5.30302	0	0	0	0	0	0	0	0	0	0	0	0	0	0	0	0	0	0	0	0	0	0	0	0
NOCLEBFK_00800	166.054	61.1363	81.7085	31.6436	45.0919	80.8469	118.888	57.2947	113.015	37.5871	0.088915	0.707249	128.917	0.06001	0	0.371502	0.107997	40.8028	45.888	55.0835	80.213	29.159	46.8002	78.8389	22.6458	8.5722	5.62249	28.1697	14.4711	11.6138	34.3449	0.238999	0.267957	22.7746	10.9667	192.379	0.13199	68.4	10.2251	23.3506	0.162882	0.343072	0	0.236927	0	0.11563	0.175713	0.168166	39.6743
NOCLEBFK_00801	1720.9	1437.95	2477.33	2139.47	2467.57	2477.89	2270	1756.96	1239.47	687.622	3727.33	2011.55	1667.2	2141.87	1545.28	663.488	1376.59	2020.01	2079.37	1731.17	1001.29	1867.6	1873.97	1251.31	1445.87	1042	1093.76	1565.94	1268.34	1203.99	1456.05	1302.2	761.973	2033.6	1768.32	1320.74	844.198	1916.01	898.543	1588.05	1237.93	1325.99	563.564	782.384	1095.45	1477.54	1876	700.534	929.341
NOCLEBFK_00802	120.945	0	0	0	0	0	0	0	0.539621	0	0	0	0	0	0	0	0	0	0	0	0	0	0	0	0	0	0	0	0	0	0	0	0	0	0	136.42	0	0	0.540931	0	0	0	0	0	0	0	0	0	0
NOCLEBFK_00803	79.6852	0	0	0	0	0	0	103.21	0	0	0	0	0	0	0	0	0	0	0	0	11.8256	0	6.40933	0	0	0	0.365703	0	0	0	0	0	0	0	0	0	0	68.0583	0	0	0	0	0	0	0	0	0	0	0
NOCLEBFK_00804	102.444	0	0	0	0	0	0.926273	0	0	0.812731	0	0	0	0	0	0	0	51.017	0	0	0	0	0	0	0	0	0	0	0	0	0	0	0	0	0	0	0	0	0	0	0	0	0	0	0	0	0	0	0
NOCLEBFK_00805	122.859	81.1841	130.49	34.1373	42.3853	47.6646	179.794	50.5724	149.34	444.082	0.39187	0	28.4647	0	0.172458	1011.72	0.237986	89.868	65.0849	43.3881	87.7987	47.2067	18.572	78.6369	6.30684	27.2426	24.7797	0.51946	0.216196	0.088402	0	0.234073	0.524869	48.4398	34.6042	16.9748	1.06648	5.49529	7.084	0	27.6775	30.4081	4.84208	0.435082	26.7595	0	0.086046	0.24705	0.548822
NOCLEBFK_00806	0	0	0	0	0	0	0	0	0	0	0	0	0	0	0	0	0	0	0	0	0.630784	0	0	0	0	0	0	0	0	0	0	0	0	0	0	0	0	0	0	0	0	0	0	0	0	0	0	0	0
NOCLEBFK_00807	259.004	451.176	465.56	180.828	254.093	270.318	182.005	361.819	438.643	2706.87	266.662	217.787	0.29722	0	0.205286	0.56845	0.283288	76.7237	174.35	87.1718	335.462	170.627	102.777	103.1	292.413	10.0956	54.4907	181.071	89.3861	22.4139	14.9604	0.417945	1.40576	14.4751	101.336	461.405	92.6724	78.9634	9.95642	4.98313	127.037	127.888	62.5975	46.0933	222.417	342.839	620.389	3.97004	861.04
NOCLEBFK_00808	59.8672	95.0174	90.9689	0.69104	17.2988	23.4326	26.6405	14.9689	58.3492	122.697	0	0	0	0	0	0.067077	0	0	13.0821	96.3809	0.084633	42.0534	0.725585	17.8936	42.7098	0	0.075901	0	0	0	0	0.115074	0	0	0.061637	8.60313	0.190653	26.3209	0.167836	23.6673	0	0	0	0	0.076485	0	0	0	0.107923
NOCLEBFK_00809	26.0612	34.4425	1.76858	25.1905	26.6633	15.1607	18.4647	68.6069	32.9253	71.0018	0	0	0.083527	0	0	0	0.159223	17.4956	10.0145	223.167	25.9152	17.187	5.67788	16.0841	58.8101	1.20364	0.051647	13.5541	0	0	0	0	0	0	0	7.25903	0.194596	24.1605	0.057103	16.3379	20.5987	0	33.375	0	0.052044	0.056825	27.345	0.041322	0.073437
NOCLEBFK_00810	41.254	0	0	0	0	0	0	0	0	0	0	0	0	0	0	0	0	0	0	0	1.94087	0	0	0	0	0	0	0	0	0	0	0	0	0	0	0	0	0	0	0	0	0	0	0	0	0	0	0	0
NOCLEBFK_00811	19.2478	0	0	7.48441	0	0.101123	4.27558	9.33034	126.848	0.0732	0	0	0	0	0	0.07063	0	8.86569	8.95388	0	0	14.532	0	0	9.46792	9.66768	7.75242	6.36406	0.149221	0	0.094977	0	0	0	20.3146	4.52946	0	0	0.088364	0	0	0	0	0	0.402684	0	0	0	0
NOCLEBFK_00812	106.868	0	0	4.12231	0.631431	0	0	35.3706	0	0	0	0	0	0	0	0	0	0	0	0	0	0	0	0.886982	0	0	0	0	0	36.0162	0	0	0.207208	0.212185	0	8.01394	0	0	0	0	0	0	0	0	0	0	0	0	0
NOCLEBFK_00813	60.7285	1.88259	0.819687	6.33567	2.38681	4.83075	7.55838	1.64142	0.726035	4.34087	1.11386	5.7992	42.3707	5.11195	1.76471	1.74521	2.84112	11.3065	8.50932	0.587273	0.146801	1.58082	1.88784	0.383176	0.268901	5.84415	0.263306	3.10071	1.10614	4.52297	4.0678	11.3772	0.89514	6.30188	2.45899	19.5485	1.32278	2.00828	0.582238	2.57814	38.9048	2.14888	6.91363	0	1.32666	5.50439	7.33736	2.00133	0.374396
NOCLEBFK_00814	20.9139	0	0	0	0	0	0	0	0	0	0	0	0	0	0	0	0	0.287897	9.01358	0	0	0.828049	16.5361	0	0	0	0	0	0	0.276404	0	0	0	0	0	0	0	0	0	0.545376	0	0.131321	0	0	0.12161	0	0	0	0
NOCLEBFK_00815	3.07557	0.757363	83.5586	13.0984	0	0	0	0.283003	0	0.990971	0	0	0	0	0	0	0	0	12.6716	0	0	43.4012	0.530428	0	3.1449	14.5012	16.9787	0	0	0	0	0	0	19.2678	0	21.3203	0	23.5299	0.09202	0	48.072	0	0	0	0	0	0	0.06659	0
NOCLEBFK_00816	60.2082	48.6601	4.45734	16.7606	4.94443	1.81165	41.9021	108.153	0	0	0	0	0	0	0	0	0.105099	29.7656	30.9952	48.2067	60.2131	9.73659	24.1165	17.2646	17.9647	0.567493	0.306819	0	12.6029	0	0	0	0	0	0	234.513	0.256896	6.34442	23.1806	0	0	0	2.53619	0	0.10306	0	0.227997	0	0
NOCLEBFK_00817	59.7404	86.8582	1.74126	24.4706	25.549	0	0	0	0	0	0	0	0	0	0	0	0	24.9888	24.9782	0	18.2573	0	29.8142	0	30.7423	1.58005	0	10.0371	0.18988	0	0	0	0	0	39.807	0	0	0	13.268	8.11936	0	25.7846	0	0	0	0	0	0	0
NOCLEBFK_00818	53.8615	0.477814	0	46.1333	18.5631	0	0.719389	0	0	0	0	0	0.29722	0	0	0	0	0	35.1075	0	0	0	13.1765	21.6631	58.1822	32.8363	37.8586	0	0	0	0	0	0	66.3777	0	0	0	1.49517	0	0	0	0.19998	4.28933	0	0	0	0	0	0
NOCLEBFK_00819	61.1363	68.6839	11.2249	11.4852	0.381169	0	2.49642	0	0.162325	0	0	0	0	0	0	0	0	0	0	0	0	1.76718	4.22078	0	0	0	0	47.0418	0.137393	0	0	0	0	55.2055	0	88.5797	0	0	0	0	0	0	0	0.165897	0	0	0	0	0
NOCLEBFK_00820	81.4017	20.8975	195.388	0.363625	0	0	41.5857	77.6345	6.1671	0	0	0	0	0	0	0	0	46.3525	5.22022	0	12.3137	2.15804	12.4722	0	55.5322	0.155129	28.3766	58.4767	0	0	0	0	0.23761	57.9092	3.85959	53.8709	0	0	0	1.05285	0	0	0	0	3.52154	0	0.155813	0.11184	0
NOCLEBFK_00821	0.231827	0	0	0	0	0	0	0	0	0	0	0	0	0	0	0	0	0	0	0	0	0	0	0	0	0	0	0	0	0	0	0	0	0	0	0	0	0	0	0	0	0	0	0	0	0	0	0	0
NOCLEBFK_00822	616.974	1944.2	3707.36	1711.8	2003.06	1720.54	2174.81	1605.89	4391.01	585.192	959.776	911.116	1283.9	938.08	904.168	385.925	577.68	1352.65	2811.43	1947.12	2743.43	620.452	733.455	695.55	670.201	472.638	447.497	641.485	624.82	628.818	629.41	735.852	489.515	2237.59	1136.84	4500.6	1435.87	8101.94	2116.15	7756.22	2586.11	3148.62	3438.91	428.183	6928.07	765.742	824.792	443.22	783.263
NOCLEBFK_00823	64.8527	246.412	0.590089	420.23	518.503	184.434	182.653	249.005	20.3841	487.756	0.160373	0.115967	4895.26	0.865899	0.317602	0.083758	0.389583	93.9433	138.444	77.2269	147.002	0.162575	0.906031	0.275847	37.7482	0.210359	0	0.425178	0.353912	0.325606	0.337891	0.287383	0	105.499	47.9498	170.271	0.119033	257.344	0.628726	21.1298	37.3106	71.47	456.233	0.427337	236.567	0.312836	0.105643	250.083	86.9222
NOCLEBFK_00824	710.884	1409.41	970.775	1094.14	757.417	211.328	469.561	1240.1	590.983	671.53	91.3951	42.5253	221.459	2.43216	0.708609	0.44049	0.60534	402.443	868.209	1583.87	1422.3	34.0832	116.09	23.3431	56.6871	0.804576	1.22344	0.55901	34.6446	1.34915	0.592331	0.961779	1.30938	698.452	670.262	1135.53	85.0796	539.19	122.241	351.184	333.118	261.918	283.231	1.1237	426.245	447.352	229.809	219.624	77.7025
NOCLEBFK_00825	651.387	276.353	356.635	323.112	353.858	59.2082	198.217	218.303	85.5027	0.573362	1.23584	0.638321	0.590586	0.417041	0.582728	0.553238	0.911365	187.485	328.193	919.201	864.061	67.3834	25.2679	21.1051	36.8673	0.868412	0.834688	0.409555	0.730517	0.477931	0.309977	0.711831	1.06411	119.954	139.125	563.932	0.917275	309.721	80.8653	208.485	262.398	267.031	34.1683	1.41132	348.64	17.6787	96.8183	1.04347	0.815958
NOCLEBFK_00826	106.15	0	0	0	0.289406	0.106039	0	0	0	0	0	0.20509	0	0	0	0	0	0	0.240747	0	0	0	0	0	0	0	0	0	0	0	0	0	0	0	0.068058	0	0	0	0	0	0	0.091195	0	0	0	0	0	0	0
NOCLEBFK_00827	68.496	0.359273	0	2.3365	0.83508	1.39874	0	0.313247	0	0	0.701477	0	0.670448	0.315623	5.86554	0	0	0.164826	1.58783	0	0	0	0.220168	0	0	0	0.829113	1.70477	0	0.316493	0.49265	0.628513	0.469778	0.962119	0.336653	0	0	0	0.152782	0	0.571122	0	0	0.155766	3.48122	0	0.308057	0	0
NOCLEBFK_00828	92.9676	24.7064	46.3297	23.4936	30.1032	33.7852	28.8973	62.3097	8.05569	0.143859	347.906	13.4532	0	0	0	0.069405	0	62.388	38.9165	1.16775	0.087571	10.4404	17.643	53.8296	18.527	27.8025	7.53935	11.8026	9.01785	0	0	0	0	0.683501	13.8395	3.20462	0	29.8701	0	4.85042	11.1982	41.789	42.8457	0.088526	1.97848	0.259226	0	0.062834	0
NOCLEBFK_00829	92.9513	212.888	194.611	121.016	184.423	124.81	242.505	276.902	180.963	68.2157	0	0.469274	4899.67	0.262797	2.2277	0.338936	0.394122	172.372	207.785	267.912	234.609	175.522	101.436	157.056	195.288	233.325	133.543	121.641	125.814	7.64209	35.9147	0.116293	0.521533	151.138	200.388	161.018	223.692	217.244	14.926	73.4871	130.216	194.477	173.543	1.03756	149.411	19.2421	30.7796	1.28877	0.436267
NOCLEBFK_00830	10.7415	0	0	0.140565	0.746408	0	0	0	20.5024	0	0	0	0	0.123423	0	0	0	92.6856	0	0	0	4.26383	12.9143	29.4102	0	0	0	0	0	0.123763	0	0	0	0	0	0	0	0	0	0	0	0	0	0	0	0	0	0	0
NOCLEBFK_00831	0	0	0	0	0	0	0	0	0	0	0	0	0	0	0	0	0	0	0	0	0	0	0	0	0	0	0	0	0	0	0	0	0	0	0	0	0	0	0	0	0	0	0	0	0.093787	0	0	0	0
NOCLEBFK_00832	247.324	346.034	274.492	206.39	112.097	241.373	165.495	460.548	150.728	428.751	111.934	9.69354	0.38437	0.180948	0.088493	0.140025	0.325647	164.233	277.303	316.639	121.022	219.197	178.732	154.256	183.898	37.6289	65.913	87.3396	62.1983	0.090723	0.094146	0.240219	0.673314	59.0198	165.405	268.132	0.298494	163.548	2.01458	5.84758	36.9173	51.9822	39.8693	0.357205	115.517	1.48181	0.088305	0.253537	0.450586
NOCLEBFK_00833	112.793	216.677	185.179	145.359	187.601	168.483	216.383	267.338	177.156	64.2815	0.129793	0.563129	4561.51	0.525593	2.6561	0.542298	0.157649	279.601	284.686	260.499	228.536	181.18	100.825	171.009	196.463	230.601	128.557	180.139	143.644	8.95969	37.282	0.348878	0.260766	170.431	192.352	145.281	195.466	260.615	30.6153	128.834	142.976	193.225	178.018	0.51878	190.532	18.6513	26.2482	2.20932	0.3272
NOCLEBFK_00834	743.547	383.944	349.055	514.67	598.26	650.505	550.964	478.425	723.628	665.946	252.756	495.89	355.934	405.18	316.546	125.117	263.688	577.788	465.906	305.209	519.303	283.969	397.269	371.728	233.195	283.991	223.249	348.385	319.826	360.503	295.394	276.791	158.51	378.18	476.56	478.093	196.232	385.848	214.995	331.993	395.461	323.317	142.447	170.726	293.81	386.708	397.79	167.129	235.664
NOCLEBFK_00835	313.228	214.134	308.797	70.9538	194.96	334.446	172.18	446.097	124.765	30.3086	0	0.100225	53.651	0.374178	0.091496	0	0.084175	152.807	158.945	0.365385	187.785	111.281	176.445	77.7189	137.941	31.2702	68.969	168.94	0.076467	0	0.194682	0.248372	0.139233	124.754	91.3294	16.7119	0.102875	157.103	10.3242	134.246	13.203	45.1897	13.0239	0	32.8513	0.450616	0.091302	0.196606	0.116469
NOCLEBFK_00836	368.284	334.095	345.405	166.735	135.867	226.084	208.723	286.689	292.834	248.583	184.412	29.533	424.605	0	0.687778	0.217657	0.126548	94.8884	107.363	203.981	399.582	157.794	93.9817	129.925	138.715	93.6132	44.5785	38.9471	84.8414	20.8713	66.8786	0.373402	0	217.243	113.304	293.679	0.154662	88.2891	11.3007	94.6061	59.2937	17.6881	114.786	0.832872	103.989	22.4915	30.198	50.4452	0.700401
NOCLEBFK_00837	446.307	273.474	494.374	571.851	454.157	381.74	615.908	491.492	335.791	133.643	566.212	0.671204	110.008	1.25293	11.6422	1.69674	0.281857	212.978	373.071	490.21	256.595	288.17	393.3	285.386	287.388	146.712	108.34	246.395	370.248	26.6981	72.3598	0.831668	0	295.52	775.34	243.734	0.688949	412.813	113.718	749.892	839.707	565.872	50.4119	0.309172	328.901	6.94085	1.22289	2.41388	0.779993
NOCLEBFK_00838	444.672	573.276	354.707	178.436	184.295	150.296	601.479	323.068	344.697	182.432	0.409781	87.1174	0.391655	0.138283	0.405766	0	0.248864	214.334	183.483	418.064	257.073	121.299	108.616	343.257	31.2856	49.3161	74.3466	87.8632	32.6682	0.138664	0.287791	0.550737	0	237.638	377.69	291.513	0.152076	135.822	32.5318	173.098	313.531	430.854	0.529891	4.64068	90.0487	24.3803	0.134968	0.290635	301.646
NOCLEBFK_00839	655.526	53.6319	344.018	136.34	462.659	260.471	408.68	241.918	15.7871	0.771149	0	0	0	0	0	0	0	620.652	72.5601	0	6.57189	4.33281	366.226	132.942	382.207	118.2	0	164.306	0	0	0	0	0	311.43	165.124	296.325	0	132.718	152.203	79.2698	0	2.29047	14.7384	0.474543	30.1198	0	0	0.336821	0
NOCLEBFK_00840	253.091	63.5655	151.997	424.743	270.344	392.934	235.635	168.883	551.729	126.693	86.4018	0.176492	0	0.329455	0.161121	0	0	274.936	167.399	170.937	61.4399	284.044	105.026	204.869	53.9141	37.2972	83.9485	72.7969	135.733	0.165181	0	0	0.245183	4.14267	135.526	403.666	0.181158	214.163	0.797388	0	91.8073	0	112.358	0.162592	4.06983	50.6262	75.7268	0.115405	288.367
NOCLEBFK_00841	360.132	43.1221	279.702	201.055	117.659	327.737	207.88	138.253	52.267	75.8674	7.21677	0.231934	40.0057	0.108237	0	0.083758	0	41.1496	53.3627	47.3508	286.079	223.216	87.281	46.756	100.275	49.1188	0.189553	62.6074	4.33542	66.0981	90.2168	0.143691	0.322204	25.9829	30.2476	450.762	0.119033	93.2027	0.209575	150.621	33.3934	4.02212	73.6885	0.427337	120.719	55.0591	38.7708	28.5875	364.265
NOCLEBFK_00842	514.379	314.178	516.795	313.559	169.458	379.94	295.364	651.102	358.224	513.902	219.814	0.122883	127.906	0.172039	0.504816	65.5444	0.309613	278.154	282.149	350.552	448.999	207.974	179.852	256.053	224.51	240.068	139.847	65.215	64.0345	3.10523	52.5725	0.304522	0.426774	177.388	152.225	324.823	0.504529	227.651	72.7293	168.454	83.8967	63.3289	147.01	0.283015	138.494	92.7628	101.812	33.2654	86.537
NOCLEBFK_00843	1211.01	4197.32	2468.03	1588.2	1079.75	3363.82	2345.89	3656.81	2535.68	993.275	1396.5	8905.2	1864.36	12020.6	3.67649	3189.38	3.38228	274.811	1064.85	3045.26	1694.63	1618.93	643.701	797.485	1678.11	1171.57	771.817	720.729	947.897	2.82685	2.93351	2.495	6.99328	1448	1943.81	1653.6	10.3342	2061	15.4657	79.3274	1038.09	201.458	996.234	4.63758	67.1621	1310.91	597.995	3.29166	47.9695
NOCLEBFK_00844	253.158	182.866	206.16	86.6249	98.1303	170.065	47.9288	427.195	211.39	282.062	0.765779	0.461453	97.0994	0.689111	1.26379	1.19983	0.387554	114.439	133.145	253.578	249.118	223.12	231.097	66.1877	124.556	56.4173	50.7619	61.4989	49.5009	0.777385	28.3246	1.60096	0.641051	72.7999	31.5448	155.94	0.568383	62.2078	5.83755	192.359	66.7897	34.3896	0.220052	0.765201	38.1553	2.90459	10.3411	37.5359	30.4587
NOCLEBFK_00845	406.195	977.825	985.381	433.447	315.535	392.429	617.718	654.416	553.343	520.287	134.777	0.63285	137.459	0.393778	0.192578	0.30472	0.354335	473.384	299.132	87.6715	87.0842	108.534	395.547	321.389	279.945	140.816	114.82	287.518	202.792	82.1313	1.0244	0	0.293052	213.064	190.547	339.043	0.866107	110.455	0.762455	6.49257	49.3436	184.412	44.7648	0	76.2671	39.0757	0.192169	0.689681	163.018
NOCLEBFK_00846	146.27	1.41666	228.806	31.183	7.63103	124.557	42.8161	31.0167	3.47234	120.771	223.946	0.148159	0.195828	0.138283	0	0	0	167.683	14.783	100.105	69.1288	1.86934	127.522	34.3609	30.049	52.5411	1.6952	114.888	89.7528	0	0.143895	0.183579	0.205822	46.8953	115.834	82.8973	0	9.60481	0	0	0	0.13176	0	0	0	0.133226	0.134968	0.096878	0
NOCLEBFK_00847	134.119	90.9205	69.4813	46.376	14.2072	93.3528	68.4442	87.2002	121.46	0.188406	0	0	0.332684	0	0.459561	0.060598	0.211393	38.8497	9.84875	119.698	69.1186	152.613	26.0015	0.498927	24.019	3.65259	20.3651	23.1476	25.8611	0	0	0.103959	0	39.8642	0	17.9537	0.086119	0.976246	0	35.1189	2.19633	0.149228	51.3121	0.154586	28.3988	0.150888	0	0.054861	1.16999
NOCLEBFK_00848	60.3631	23.6088	61.4765	0	0	9.59308	0.383441	54.4918	45.8958	8.88199	0	0.071915	0	0	0	0	0.060398	0.140209	1.01301	24.7319	0	0	1.03007	0.08553	0.060022	0	0	0	0	0	0.069845	0	1.19885	0.30691	0.047729	0	0	0	0.519856	0	0.364368	0.447684	19.2045	0	0.059226	0	0	0.047024	0.083571
NOCLEBFK_00849	41.3775	0	0	0	0	0	0.243505	0.423045	0	0	0	0	0	0	0	0	0	0	0.268048	0	0	0	0	81.4743	0	0	0	0	0.871098	0.213714	0	0	0	12.1815	67.8951	0	0	0	0	0	0	0	0	0	6.58201	31.6211	206.562	0	0
NOCLEBFK_00850	3.44924	0	0	7.92159	7.30277	21.62	56.0698	2.68456	0	0	136.838	0	35.022	0	0	0.149512	0	29.8659	75.5721	179.612	129.788	60.9428	0	0.492399	0.34555	7.32225	0	0	0	0	0	0	0	0.14724	82.4327	0.958807	0	0	0.374102	0	136.873	97.2017	0	0	0	0	0	0	0
NOCLEBFK_00851	13.8564	208.714	0.398258	23.7943	62.5117	183.073	195.303	166.026	0.141102	0.351513	0	0	0.620697	0	0.142902	0	0	2.28893	37.6689	160.929	82.1668	75.0511	86.6279	44.6813	62.8425	33.9317	54.115	0	106.173	0	0	0	0.217459	148.417	123.526	78.1587	0.160674	166.138	0	3.27611	2.11497	0.139209	0	0	35.3229	0	0	0	0
NOCLEBFK_00852	138.605	38.5075	102.836	6.36908	14.623	39.9176	41.1647	95.2639	47.2808	66.9806	0	0	0	0	0.08967	0.141887	0.082495	78.3258	16.027	0.596822	120.842	10.0523	23.6619	31.3083	67.3892	0	12.5231	6.48231	47.8876	0	0	0	0	182.978	15.9065	5.55045	0.100822	0.081637	3.37272	0.483704	15.3449	0.087353	0	0	0.080894	0	0.08948	0	0.114145
NOCLEBFK_00853	27.1286	22.734	104.604	11.0306	32.7202	0.296018	76.927	34.6049	18.0629	29.3024	0	0.071566	0.378368	2.07067	0.065333	0	0	36.208	1.34414	1.13059	29.4135	0.852797	1.30465	20.1725	10.8712	1.10345	0.058489	20.8598	1.74726	0.13396	0	0	0	12.2169	0.997449	52.2409	0.146916	0.059481	0.64667	0	21.3935	0.445514	0.170638	0	0	0.128706	0.130389	0.046796	0.083166
NOCLEBFK_00854	62.8915	0	0	0	0	0	20.3899	0.526094	0	0	0	0	0	0	0	0	0	0	0	0	0	0	0	0	0	0	0	15.2701	0	0	0	0	0	0	61.4406	0	0	0	0	0	0	0.16836	0	0	0	0	0	0	0
NOCLEBFK_00855	161.958	0	0	3.00571	3.32509	1.94931	10.051	0	1.69923	1.41104	2.60691	9.42542	6.22898	2.63915	1.72091	0	16.6236	3.67528	8.8513	0	0	0	1.22732	0	0	1.70972	0	0.863925	2.15736	0.882139	0	0	1.30938	0	1.25111	0	0	0	0	0	0	0	0	0	0	33.0541	0.858627	0	0
NOCLEBFK_00856	91.1364	0	0	0	16.5472	139.223	0.926273	18.5061	9.5915	0	96.0978	0	0	0	0.396484	0.156841	0	81.9236	8.92181	269.167	16.4251	3.50094	0	0	0	0.196954	0.177474	0.398083	211.241	0	0	0	0	0	0.144123	114.461	0	84.8268	0	0	0.183375	0	0.776653	0	0	0	0	0.141993	0.252351
NOCLEBFK_00857	73.1624	132.446	0.132596	0.332396	36.551	50.6591	53.2421	32.7317	19.5432	0	0	0.104234	6.33744	0	0	0	0.087542	23.1672	18.8429	158.333	4.74943	0.511442	21.4449	2.10747	27.9261	0.094538	11.7559	0.09554	0.159052	0	0.101235	0	0	76.9571	0	42.4853	0.10699	54.318	0.188371	0	0	21.8765	0	0.096025	0.171685	0	0	0.40894	0
NOCLEBFK_00858	25.9152	0.113958	85.5536	96.1172	2.42176	13.3101	26.6511	93.5964	45.7332	4.01446	0.148335	0.214525	52.5979	0	0.195842	0	0.090085	39.7339	19.1385	10.6885	110.554	33.4578	0	28.7034	2.95433	126.567	21.6526	0	75.3717	0	0	0	0	51.0407	3.48826	52.563	0.110098	0.178298	33.5351	0	35.3252	0.286171	0.127875	0	0.088337	0	0	0.070137	0.124648
NOCLEBFK_00859	59.3399	82.6458	14.129	0.904696	14.7422	25.2586	20.3753	24.2428	7.78692	1.24228	1.05929	0.510657	2.02487	3.17746	0.310788	0.276619	0.643317	6.05662	9.14146	0.775697	0.232681	6.4132	54.4701	12.8554	69.0818	3.47365	0.452123	13.5738	0.681816	0.039828	1.90119	0.632739	1.06411	21.1879	13.246	49.3547	0.524157	48.0656	0.692142	11.8401	25.9452	0.378445	13.5456	0.35283	2.31305	0.382655	2.24843	0.38956	0.395616
NOCLEBFK_00860	101.215	0.045872	1.48299	17.6241	16.816	40.4957	50.8312	86.0703	49.8176	0.161596	0.05971	0.043177	0.285343	0.040299	2.95624	0	0.543935	12.1641	16.2694	25.9722	54.4564	10.8348	26.9867	19.1541	26.0547	18.6403	4.9402	21.2125	7.70845	0.565738	0	1.06998	0.179944	36.976	17.2222	35.4773	0.177273	14.3542	7.45177	6.00658	0.984434	9.86824	0.154422	0.159106	0.177793	0.737675	0	0.056465	34.7712
NOCLEBFK_00861	224.021	164.328	149.599	50.681	62.7766	115.59	161.536	217.088	194.584	168.818	302.937	0	94.0312	0	0	0.135575	0.157649	112.261	171.539	231.871	168.066	60.5905	54.5065	66.1933	176.958	73.5471	10.5852	6.36596	35.8752	0.08784	35.8236	1.5118	0.260766	94.7285	28.4044	176.233	0.192672	148.288	0.254421	56.2708	28.5319	7.26158	0.111891	0.864634	9.35267	55.8695	10.5164	0.30685	13.7424
NOCLEBFK_00862	12.6329	110.645	210.211	118.153	81.2779	147.183	171.712	395.954	207.355	0	0	0.089857	0	0.167735	0.082031	0.194699	0.150934	70.5143	68.7726	147.741	155.83	49.0027	105.656	61.3432	69.8228	28.6873	56.5468	44.146	15.9052	0.168197	0.087271	0.222678	0.124829	88.009	191.733	117.451	0.184465	173.935	0.73075	62.06	28.7582	12.3862	70.5951	2.40063	124.768	0	14.8161	0.411291	0.104421
NOCLEBFK_00863	36.7537	38.0814	1.40299	35.1705	66.6619	0.190078	243.06	149.158	59.9808	126.584	0	0	0	0	0.167806	0	0	97.1204	26.1086	32.6127	105.699	65.4536	55.7692	19.8942	24.7004	15.838	3.00453	36.3924	121.591	0.172035	0	0	0	5.75276	84.4211	300.2	0.188675	33.4574	0.166095	0	0	0	0.876555	0	19.2256	2.31403	0.16745	0	0
NOCLEBFK_00864	42.3738	0.103667	0.37238	0.414885	0.481918	1.009	1.04053	0.994249	0	0.146077	0	0.390304	0.902791	0.910719	0.445389	0	0.08195	1.23656	9.16324	0.118576	0	0	1.52469	4.642	0	0.353996	14.3543	0	0.148893	0.365291	0.947682	1.08813	0	0.69404	23.1841	0.180779	0.100156	0.081098	0	2.28241	0	0.520654	0	0.089891	0.723234	2.71997	0.088889	0	0
NOCLEBFK_00865	4.62878	4.87962	11.6853	2.51984	2.82244	3.06413	3.94982	3.56829	3.873	2.77253	1.84402	3.55581	2.1541	3.18051	2.43459	0.749061	1.99091	2.02202	2.08701	2.16054	3.78048	1.24623	0.964615	1.23347	1.85488	6.71882	1.81628	1.49381	2.0347	1.38664	3.3096	0.367158	1.64658	0.421531	1.96662	4.39191	1.36868	1.10825	1.20488	2.0064	2.50224	2.37168	0.883151	0.818944	1.70824	1.99838	3.91408	0.678148	1.72172
NOCLEBFK_00866	273.644	1.07372	28.2839	1.25333	33.0385	39.19	115.495	73.3332	0.455498	1536.68	0.69881	0	0.445266	0	0	0	0.424393	77.6664	24.1223	98.8651	9.05643	63.2843	45.4015	0	56.6558	0.45831	6.88301	17.1372	0	0	0	0.208708	0	0.599038	0.894327	0	0.345784	86.5163	0	0	62.1578	0	20.4824	0.155174	0	63.4625	85.0074	0.110139	106.678
NOCLEBFK_00867	41.6483	0	6.84851	0.490515	0	0.159058	0	52.1491	0	0	0	0	0	0	0	0	0	50.5319	16.431	0	84.525	0.754732	0	0	0	0	38.4674	0	0	0	0	0	0	0	32.6678	0	0	5.36935	0	0	0	0	0	0.141704	0	0	37.1326	0	0
NOCLEBFK_00868	35.1348	17.922	116.439	0	27.944	6.21908	85.8765	15.4902	88.3263	72.1382	0	0	0	0	0	0	0.123196	44.9005	0	4.63466	1.33676	43.6988	29.033	3.31473	0	0.266083	57.7835	0	0.559579	0.274573	0.284932	0	0	0.104336	0.097354	13.996	0	0.365746	1.7231	38.6459	0.247738	19.4372	0	0	52.7918	0.263804	0	0	0
NOCLEBFK_00869	82.9337	0	0.162871	23.2725	30.7138	43.6905	27.1698	146.945	42.5864	4.60015	0	0	54.8294	0	0.233765	0.092473	0	43.9334	0.300586	34.5405	116.443	93.5145	57.684	45.9867	13.2507	16.3733	0.104638	0.352062	34.5801	0	0	0.317284	0	36.7913	26.5119	50.288	0.131418	131.206	0.11569	0	0	0	21.2166	0.35385	0	0	0	0.083719	0.297569
NOCLEBFK_00870	249.855	331.976	203.748	259.471	77.5908	342.508	338.276	389.571	488.631	131.351	4.41632	88.8446	86.584	0.076426	0.149506	0.118283	0.275084	156.454	158.888	151.947	264.757	167.026	126.67	104.789	74.3578	159.452	61.5679	26.4192	28.051	4.98139	0.079528	0.405842	0.227508	49.0988	74.4536	250.773	252.736	86.0231	138.88	8.66957	97.428	19.1519	78.096	28.6656	24.412	72.453	79.1445	0.535427	511.369
NOCLEBFK_00871	81.1231	169.066	141.542	71.6738	159.933	110.893	232.15	283.943	20.8476	51.4186	0	7.24901	19.7709	0.107394	0	0	0.096637	66.4032	68.7499	60.6849	2.09715	79.4443	177.846	60.6239	130.801	125.44	55.6705	217.577	0.263366	17.1227	0	0.142572	0.479539	218.192	70.1042	207.103	0	63.4998	108.13	90.5183	241.552	61.8059	43.896	0	169.528	9.00155	61.9483	0.075238	168.478
NOCLEBFK_00872	495.57	282.388	614.789	306.827	460.211	1100.86	495.485	1032.01	3001.76	2461.9	15673.2	3332.88	2771.83	533.765	4767.69	10036.9	11865.6	381.04	213.182	22.1667	346.526	175.914	304.342	167.119	442.348	79.448	58.6482	6.98177	103.69	3.56448	4.47769	3.97394	4.17698	4796.42	31388.7	297.286	8.02423	234.405	625.791	1971.74	10578.1	9565.07	143.621	5.35525	5783.15	266.224	771.319	5.24282	6.05641
NOCLEBFK_00873	94.6496	253.995	101.727	36.0356	14.3806	95.3812	7.20797	49.5122	0.093737	0.077839	24.8788	0.207979	0.137447	0	0	0	0	0	47.3628	86.6894	0.094766	42.4958	17.1969	0.494711	89.4837	0.188632	0.339949	24.7821	0.079339	0.291976	0	0.12885	0.144462	0	16.771	4.04589	0	24.1999	0.093965	18.0512	12.2939	0	60.0029	0.287399	0	0.187016	0	0.067997	0
NOCLEBFK_00874	425.294	51.477	46.7935	178.688	37.1163	70.9627	68.1182	131.35	22.1052	96.5176	0.273493	0	0	4.61458	0	0	0	0	66.6268	196.828	33.7019	36.874	37.3401	129.13	77.5791	58.4741	5.65697	0	21.5768	0.370183	0.192075	0.49009	0.274736	0.703335	0	30.5945	0.202994	6.90346	0.357401	0.243471	8.0161	0	137.925	0	71.3376	1.24483	0	0.129315	0
NOCLEBFK_00875	154.591	596.035	311.114	216.256	208.648	805.889	361.875	475.701	836.16	88.9673	0.693536	0.167168	233.547	0.156025	0.305218	0.120738	0.42119	498.333	256.867	307.155	502.266	532.92	286.461	211.741	587.536	438.477	239.634	375.247	415.787	0.625819	4.38365	0.82853	1.85784	321.158	322.856	566.31	0.514762	556.861	65.2546	111.956	102.626	65.2638	64.3714	0.616011	113.167	815.027	156.701	49.4072	674.867
NOCLEBFK_00876	13.1521	30.7572	109.865	38.1053	84.7198	229.747	118.929	299.036	112.44	238.442	0.268694	0	0.128404	0.181345	0	0.210497	0.16318	113.833	92.2569	218.757	138.374	32.3457	116	72.6753	195.734	76.4802	68.5188	21.1927	73.0821	0.090922	0.471763	0	0.269916	56.4544	76.4684	83.7837	0	88.6549	19.0488	54.7768	78.5906	32.3118	0	10.5607	21.4418	64.2942	43.8954	69.0498	90.4278
NOCLEBFK_00877	152.211	0	0	0	0	84.0314	0	0	0	0	0	0	0	0	0	0.101897	0	0	0	0	0	0	0	0	0	0	0	0	0	0	0	0	0	0	55.3376	0	0	0	0	0	0	0	0	0	0.464753	0	0	0	0
NOCLEBFK_00878	62.7085	0	0	0	0	0.137152	0	9.09167	0	0.09928	0	0	0	0	0	0	0	52.2352	0	0	0.120869	0.464848	8.11721	32.8109	133.062	0	0	0	0	0.124133	0	0	0	93.3962	12.7639	0	0.544559	0	107.982	44.9037	0.672009	1.17953	0	0	92.7371	73.5864	80.8318	0	0
NOCLEBFK_00879	359.657	58.925	141.109	29.1954	1.12521	38.4794	55.3652	21.6667	0	0	0.245049	2.65797	2.10789	0.330773	0.485296	0	0	0	48.0493	22.8253	1.29184	5.46512	54.9152	26.9756	87.8499	22.3393	0	2.92352	52.9962	1.49258	2.75358	0.878242	0.492327	5.41962	14.5829	0.164148	0	71.1332	0	1.3089	8.97804	0.315169	0	0	0	0.796689	2.25991	0	0
NOCLEBFK_00880	93.2999	14.137	25.1278	26.8831	13.8785	56.2354	79.1445	47.9256	32.1095	0	0.228591	0	4.91578	0	0	0	0	2.0142	27.553	53.3312	16.6452	9.55887	0.753336	0.884665	19.3837	0.3748	41.6758	0	22.8897	0	0	0	0	14.5202	19.363	108.334	0	27.2704	0	0.101749	3.83856	1.029	0	0	1.63357	0	0	0	65.8861
NOCLEBFK_00881	203.289	22.3227	39.7634	130.596	4.23561	85.5169	33.4432	69.415	78.9309	0.774753	3.00586	5.48568	5.06177	0.483022	1.22836	2.69122	0.608495	16.6482	29.7672	9.81075	9.62093	120.507	8.76042	3.93919	82.2409	36.6113	42.8872	4.36403	0.868656	1.45306	7.33833	1.53897	2.15681	38.8714	39.7738	135.383	0.637439	4.12917	0.561153	1.65652	0.87403	1.28866	47.3831	0.476761	8.18313	4.09513	3.77154	1.82733	0.240558
NOCLEBFK_00882	55.0711	0	18.945	0	9.79528	0	0.134587	50.3882	13.6519	0	0	0	0	0	0	0	0	48.3519	0.592609	0.460114	0.575074	0	2.13644	20.8645	32.971	0	0.103147	8.09776	7.41451	0.590606	0	0	0	0	0	0	0	0	0	0	68.7421	19.193	0	0	0	0.113488	1.03476	0	0
NOCLEBFK_00883	46.4791	2.46781	90.9676	1.23455	39.8015	30.1961	34.678	0.153691	0	0	0	1.99099	0.219297	1.70342	4.24104	0.239667	2.50821	1.6174	9.54333	0	1.66319	0	2.59254	9.27444	46.2519	4.96588	0	6.38722	4.81029	0.776414	0	0	0	0.236026	97.3427	1.38327	0	14.4792	3.29826	0.204261	108.863	28.4774	0	0.305698	85.6739	3.72982	0.151144	0	0
NOCLEBFK_00884	0.198851	0	0	0	0	0	0	0	0	0	0	0	0	0	0	0	0	0	0	0	0	0	0	0	0	0	0	0	0	0	0	0	0	0	0	0	0	0	0	0	0	0	0	0	0	0	0	0	0
NOCLEBFK_00885	386.409	157.55	452.826	366.696	104.186	365.496	315.603	286.957	282.922	0.470346	99.0625	23.2494	132.885	0.293239	0.286818	0	0.263866	159.568	203.58	734.577	53.5406	332.1	121.095	444.661	116.691	141.052	214.146	252.266	238.987	0	0	0	0.43646	274.199	191.211	52.9696	0.644974	116.983	63.592	0.386792	1.06123	205.922	0.374556	0.578875	14.231	1.9776	0	0.616311	0
NOCLEBFK_00886	194.82	243.656	129.521	54.809	15.5767	207.867	57.1525	162.796	292.223	0.108719	0.20086	0	0	0.135563	0	0	0	59.892	61.0377	72.1897	160.422	37.364	72.0577	2.59115	29.8215	67.1838	0.356111	0	0.44326	0	0	0	0	0.309929	45.5957	46.0152	0	150.412	0.131242	0	33.2384	0.129168	0	0	0	28.3412	0.132313	0.094972	6.41384
NOCLEBFK_00887	115.563	101.999	189.587	30.9512	25.5118	63.4801	89.5525	139.208	121.449	0.933295	0	0	0	0	0	0.052973	0	24.8811	29.014	49.377	30.6118	42.1565	9.74134	107.554	68.6832	28.2713	14.5058	42.6213	3.07769	0.137287	2.56439	0.090878	0	17.9458	68.6348	110.677	0	6.27864	12.128	47.3141	43.4781	20.1547	40.746	0	1.38926	0.065951	0.133627	0.047958	0.085231
NOCLEBFK_00888	54.7836	0.21011	2.51578	19.7607	16.3954	32.6183	46.08	6.13699	0	0	0	0	0	0	0	0	0.166094	1.15673	10.7949	49.9881	53.076	30.4973	20.4727	10.702	19.4773	0.179368	0	0	0	0	0	0	0	0	2.75634	4.30521	0	0	0.08935	0	34.9034	12.6631	0	0	7.3292	0	0	0	0.11491
NOCLEBFK_00889	192.992	110.759	43.9557	24.1726	31.881	20.614	63.9313	54.7138	59.8979	0.331594	0	115.031	107.346	0.137822	0	0	0	3.45476	50.4414	63.3439	52.3466	73.3858	39.0328	10.3617	57.6792	37.2321	34.8771	0	63.316	0	0	0	0.205136	3.46604	0.196007	0.547159	0	39.5185	0	0.181792	0	0.131321	0	0	0.12161	0	0	0.096555	0.171598
NOCLEBFK_00890	87.0444	186.483	510.903	154.595	163.651	108.04	0	4.64551	55.754	0	0	0	50.8191	0.390063	0.381522	0	0	294.551	101.059	0	46.8446	19.6271	140.945	33.799	3.4881	0	0	87.3379	0	108.736	0.405894	0	0	160.52	141.458	0	0	17.3672	0	0	0	0	0	0	0	0	0	0.27327	0.485656
NOCLEBFK_00891	71.8964	0	0	0	0	0	0	0	0	0	0	0	0	0	0.262606	0	0	0	0	0	0	0	0	0	0	0	0	0	0	0	0	0	0	0	0	0	0	0	0	0	0	0	0	0	0	0	0	0	0
NOCLEBFK_00892	30.6726	75.9395	99.7609	50.2711	50.8541	27.8567	25.2797	109.243	70.5824	0	0.331148	0	0	0	0	0.086475	0.100554	7.35304	33.7306	151.315	16.039	0.083924	40.067	34.6024	1.6988	0.217181	0.391401	0	0	0	0	0.148352	0	0	82.0844	48.5788	0	6.16958	0.108186	0	1.61766	0	0	0.220598	0	0.107661	0	0.078288	102.542
NOCLEBFK_00893	34.5494	0	0	7.39878	0.091794	0	0	0	0	0	0	0	0	0	0	0	0	0	3.81802	0	0.059281	37.1619	10.6728	0	0.054293	0	0	0	0	0	0	0	0	0	0	0	0	0	0	0	0	0	0	0.059928	0	0	0	0	0
NOCLEBFK_00894	0	0	0	0	0	0	0	0	0	0	0	0	0	0	0	0	0	0	0	0	0	0	0	0	0	0	0	0	0	0	0	0	0	0	0	0	0	0	0	0	0	0	0	0	0	0	0	0	0
NOCLEBFK_00895	0	0	0	0	0	0	0	0	0	0	0	0	0	0	0	0	0	0	0	0	0	0	0	0	18.4869	0	0	0	0	0	0	0	0	0	0	0	0	0	0	0	0	0	0	0	0	0	0	0	0
NOCLEBFK_00896	61.9393	2.3737	0	1.06463	6.30553	4.14271	8.21564	16.9851	0.763916	0	0	0.385213	0.712812	0.287629	0	0	0	0	31.02	0.374493	0	0	1.0032	0.183258	0	19.3556	0	0	0.05878	0.721053	0.074826	0	0	12.0558	12.374	0	0.237238	0	0	0.094848	0.585524	0.205545	0.091848	0	12.2456	0	1.54404	0	10.2959
NOCLEBFK_00897	497.757	0	0	0	235.241	0	370.46	0	283.727	0	0	0	0	0	1.06425	0	0	237.515	0	0	0	0	0	0	0	0	0	0	0	0	0	0	0	0	0	0	0	108.517	0	0	0	110.931	0	0	0	0	0	0	0
NOCLEBFK_00898	105.957	0.19132	112.249	31.9672	16.3903	93.2935	69.5156	0	101.778	0	0	0	0	0	0	0	0	0	71.4491	0	1.64106	0.126227	0	3.2126	0	0	0	0	0	0	0	0	0	2.43365	15.6566	4.0036	0	0	0.162719	0	0	0	56.4621	0	0	0	0.164047	0	0
NOCLEBFK_00899	32.9942	322.155	16.05	69.74	41.7404	119.306	60.3953	183.101	169.205	149.217	80.843	0.140188	0	0.130844	223.835	0.101252	0.117738	92.5187	44.1025	0.340718	75.6302	109.369	73.9304	102.206	54.5247	216.405	93.7195	124.512	111.45	0	0.136154	0	0.19475	92.6337	10.3276	194.925	0.143894	24.0019	37.8754	10.3552	115.54	15.0852	56.6564	0.258296	8.42807	0.378175	0	3.11666	0.16291
NOCLEBFK_00900	76.7299	9.26663	6.7157	64.5345	45.7501	40.5871	59.8454	34.6568	8.06915	0	0	0	41.5631	0.107116	0	0.08289	0	112.436	31.12	16.3174	49.9921	45.2102	9.56419	8.05315	34.4834	29.7696	51.1179	28.6125	1.92634	0.107411	0	0	0	0	46.8436	71.2299	0	3.72	0.103702	0	0.096913	9.18563	0	0	55.4808	0	0.104548	0.075043	0.133367
NOCLEBFK_00901	128.752	4.76799	0.184162	29.0846	8.58004	1.34732	0.154379	13.4102	93.0441	0.541821	419.427	0.14477	62.188	0	0.264322	0.104561	0.121585	61.672	46.0535	0.175926	125.86	5.07383	0.18851	0.688715	4.71235	3.80777	0.118316	0	91.8969	0.135492	2.24966	0	0.201114	7.20803	1.34514	9.52164	0	0.120322	0.130813	0	0.2445	0.128746	0	0	10.6111	0.260356	0	0.283986	0.504701
NOCLEBFK_00902	86.0638	38.77	48.3345	38.0527	19.3411	20.2731	0	51.321	0.05213	0	0	0	0	0.107955	0.052795	0.04177	0	39.6328	7.33179	61.7046	0.052703	10.8235	24.7755	2.26979	1.64114	20.2466	1.55973	20.5143	27.4007	0.324756	0.056168	0	0	19.2512	16.5812	33.4296	0	17.8324	0.052257	0	0	0	0	0	0	0	0	0.075631	0.067206
NOCLEBFK_00903	168.205	21.915	74.9443	28.8038	5.31672	15.8206	66.3144	128.183	100.036	1.42437	0.105262	5.17588	0.201211	0	0	0.054975	0	13.5044	11.5261	122.004	88.7866	50.7393	22.1023	6.06531	33.8609	6.83449	38.8173	0	0	0.142476	0.295703	0	0.211481	9.52862	18.8934	3.31398	0.078128	28.2781	0.137556	0.093707	1.09269	0.744601	57.0773	0.070121	0	0	0	0.149312	0
NOCLEBFK_00904	0	62.3289	56.9627	0	0	0	243.86	27.0612	78.5688	0	70.2033	0	0.632999	0	0	0	0	70.2624	0.281089	0	0	1.51063	0	80.5964	0	33.0115	0	0	0	0	0	0	0.332653	0.170321	0.158924	0	0	0	0	0	0	0	0	0	0	0	0	0	0
NOCLEBFK_00905	50.4995	0	0	0	0.690192	84.1032	28.1651	15.5339	62.4803	0	0	0	2.2165	0.130431	0	0	0	0	30.5119	6.79285	0.636753	19.2972	2.91149	0	47.2379	0	0	0	57.4683	0	0	0	0	0.099399	0	19.0297	0.143441	0	0.126274	0.516129	0	0	80.4681	0	0	0	0	0	0.162396
NOCLEBFK_00906	77.2031	30.2559	130.821	52.8555	0.637875	100.265	71.5829	0	26.078	3.89116	0	0	0	0.210952	0	0	0.189822	48.0318	56.2464	0	0	0	32.9623	25.2681	141.482	69.6974	0	0	0	0	0	0	0	5.78744	0	190.947	0	0	0	0	0	0	0	0	24.9426	0	0	0.147789	0
NOCLEBFK_00907	232.125	45.8262	0	50.807	102.815	21.94	197.164	24.4052	1.68135	0	0	0	0	0	0.212849	0	0	0.681861	0	0	0	0	12.144	10.5373	22.5735	25.3759	37.9196	0	86.9869	71.574	0	0	0	0	13.4626	0	0	60.6535	0	0	0	0	0	0	0	0	0.212397	0.304912	0
NOCLEBFK_00908	11.8217	0	0	20.7978	19.2744	1.04978	1.37783	0	0	38.9623	0	0.553743	63.9197	0.086139	0.252758	0	0.697596	0.179935	1.30004	62.5813	0	0.064691	0.120175	0.109764	0	0.418526	25.7204	0	0.422483	0	0	0.228709	0	0	0	0	0.094731	106.16	0	0	3.03944	0	0	0.085022	0	0.082988	0	0.060347	0.107249
NOCLEBFK_00909	121.336	11.0324	24.9652	0.101268	0	106.395	60.0404	1.05898	231.262	3.70815	0	0.095268	0.503677	0	0.086971	0	0	119.802	20.9124	0.578853	141.773	0.133556	27.5395	21.5279	23.4565	1.6417	17.0512	60.8631	46.5185	0	0.092526	0.118043	0.132346	0	0	0	0	0	0.172167	0.117285	0.080448	0	0	0	0	0	0	0	0
NOCLEBFK_00910	152.367	11.4441	51.5439	31.2413	42.4294	40.5714	80.5589	37.0706	21.3485	0.587365	54.554	4.49415	5.1858	10.1869	3.06078	1.23655	0.659028	44.5753	39.1057	102.379	43.7506	73.3043	22.3862	8.22965	5.41807	24.0036	13.9921	7.97705	32.1114	4.67349	10.1153	1.14907	4.36038	35.5686	8.19062	161.438	3.07531	23.1227	19.531	15.4567	8.73467	4.50423	51.4517	2.89158	19.6809	8.21064	8.38302	2.84535	2.81852
NOCLEBFK_00911	83.3059	0	105.612	27.4406	6.29614	95.7371	0	4.13306	138.038	0.238557	0	0	0.21062	0	0	0	0	44.8933	0.935277	0	281.72	3.68601	8.71485	23.6901	27.9299	0.144527	0.781395	0.146059	102.368	0	2.01195	0.394893	0	46.5841	67.157	0.147615	0.163563	6.35714	4.60764	203.241	9.28484	0	1.13984	39.3427	0.131234	153.32	166.212	0	39.9985
NOCLEBFK_00912	231.58	87.9231	173.891	55.7829	83.8756	200.753	91.4689	330.447	55.5537	177.312	36.2188	14.6042	107.711	0.363487	0.088882	0.07032	0.163539	180.995	57.373	63.4169	73.6423	96.7043	23.2004	54.8868	76.223	80.7986	14.5614	43.9064	37.1413	0.091122	0	0.241275	0.270509	90.9964	93.6309	307.01	0.199871	58.9095	12.3166	11.5068	5.17964	72.818	96.2231	0	2.24512	114.601	209.405	0.063663	15.2741
NOCLEBFK_00913	214.499	156.781	152.934	5.45087	93.466	56.5613	89.1634	115.189	73.0588	12.5814	72.0965	153.837	76.4382	0	0	0	0.119631	172.599	30.4317	0	11.6827	31.0518	71.224	27.7834	51.597	8.65582	5.58785	0.261122	23.8003	0.133314	0.138343	0.176496	0	0.405266	39.8001	0.263903	0.146208	35.3978	0	0.175362	0	7.72722	0	0	8.32895	0	0	0	0
NOCLEBFK_00914	73.5362	0	0	73.9977	22.5606	316.528	0	59.5476	23.719	0	0	0	0	0	0.30407	0	0	112.345	39.4898	346.072	156.321	66.3062	0	0	60.8818	78.5445	0	0	0.50825	0	0	0	0	79.8396	0	0	0.341885	0	0	0	0	0	2.38252	0	0.274309	0.299507	0.303425	0	0
NOCLEBFK_00915	37.1852	0.202865	78.7006	32.8814	22.7683	134.86	171.245	172.985	117.214	0	0.264062	0	0	0.178218	0.174316	0.275824	0	72.7808	4.93117	229.72	95.8791	17.9351	31.0797	61.0893	39.6832	0.173183	43.8513	84.7093	32.3418	0	0	0	0	3.66704	0.760371	237.2	0	0.793501	0.172538	0	0	0	0.22764	0.175908	116.054	0.1717	0	0	0
NOCLEBFK_00916	26.5854	0	0	27.9344	0	50.6226	0.160135	0	0	0	0	0.150168	0	0	0	2.38611	0	38.0609	8.99007	0	26.138	0	25.2245	0.714396	0.376005	2.04298	0	0.137642	1.71857	0	10.501	0	0	0	17.6406	0	0	0	0	0	1.5217	0	0	0	0	0	0.136798	0	0
NOCLEBFK_00917	170.636	3.54462	0	0	0	12.4585	0	0.515088	0	0	0	0	0	0.172999	0	0	0	0	0	0	0	0	0	0	0	0	0	0	0	0	0	0	0	0	0.123017	0	0	0	0	0	0	0.164837	0	0	0	0	0	0	0
NOCLEBFK_00918	284.467	147.758	459.691	147.277	76.702	293.475	108.217	124.689	327.632	103.709	0.181787	58.102	28.4944	0.12269	0.120004	0	0.110401	314.593	137.333	120.925	289.06	163.828	120.332	173.382	52.1145	3.69595	56.939	44.0986	89.9624	0	0	0	0.547842	21.9724	176.581	187.65	0.134928	138.643	0.11878	0	0.111004	47.6962	0.940281	0.2422	39.4061	0	0	0	0
NOCLEBFK_00919	382.444	116.13	268.985	601.482	225.079	530.009	303.286	367.214	356.788	140.224	135.212	89.8222	83.0359	0.081552	0.39883	0.189323	0	225.036	125.644	140.795	323.439	193.599	163.722	148.188	89.2623	71.8775	60.4838	80.328	41.265	11.694	1.1032	0.324794	0.121382	102.856	111.225	323.925	0.179371	77.1953	56.9247	90.0355	48.9926	62.8629	39.3749	0.321978	54.4009	47.6913	44.9721	0.399933	70.467
NOCLEBFK_00920	247.708	167.907	87.4918	103.088	9.38614	239.774	153.069	32.6558	154.092	52.0792	0	0	0.175833	0.248328	0	0.096083	0	0	18.2708	0.161662	54.918	88.3998	57.684	0	136.681	8.08397	8.15419	17.8026	1.42096	0.124506	0	0.164835	0.369615	30.7524	25.2513	0.123234	0	93.0965	0.240414	0	1.57273	0.118307	0	0	0	0	0.121188	0	0.154593
NOCLEBFK_00921	112.155	14.9061	134.025	13.2568	1.19157	6.98551	2.4936	8.42368	49.183	0.291725	3.95241	6.49552	1.37366	0.121251	0	0.375315	0.872848	0	3.65992	0	0.118388	0.364244	2.36826	36.309	0.216855	0.117826	0.212344	0	0.396465	0.48634	1.26172	0.160968	4.87274	5.72898	2.67282	60.5325	0	0	1.05648	0.639737	0.109702	0.92425	0	0.957436	0	0	0.118345	0.084946	0
NOCLEBFK_00922	174.495	202.646	2.04391	193.237	75.1436	229.756	104.148	155.53	54.6219	77.3147	0.158711	1929.44	522.724	0.214231	0.209541	0.08289	0	11.2996	36.5088	0	40.2656	70.3895	57.9829	133.764	194.927	106.588	104.018	60.9067	1.1383	0.107411	0.111463	0.142202	0	44.9785	63.753	140.546	0.235599	87.7538	12.859	0	0.387653	28.4755	31.6054	31.6124	57.9382	0.103198	0.209096	0.150086	0.4001
NOCLEBFK_00923	0	0	0	0	0	0	0	0	0	0	0	0	0	0	0	0	0	0	0	0	0	0.139246	0	0	0	0	0	0	0	0	0	0.984576	0	0	0	0	0	0	0	0	0	0	0	0	0	0	0	0	0
NOCLEBFK_00924	150.183	162.018	130.951	3.7265	53.6296	86.0151	57.2656	86.2038	0	0.119278	0	0.159351	0	0.148729	0	0	0	0	7.10811	0	3.33998	0.111697	3.11245	0	39.3678	40.9012	1.04186	0	2.06682	0	0	0.197446	0	48.3975	0.211518	0	0	1.98661	0	0	48.7118	0	0.949864	0.293602	0	0.143289	0	0.104196	0
NOCLEBFK_00925	129.917	120.88	126.496	79.1503	52.8214	36.48	87.5159	74.3376	113.06	109.91	113.494	28.7475	0.355942	0	0	0.097251	0.169628	43.9064	26.3168	81.65	74.421	93.6274	74.7788	43.959	95.6376	28.8211	2.09084	57.7596	93.8964	12.917	0.130774	0.166839	0.467636	16.3293	28.9989	72.7813	0.276417	1.39888	14.9652	15.7479	0.568518	0.718471	93.425	0	0.166336	1.21077	0.122661	70.6116	0.312945
NOCLEBFK_00926	243.001	0.288151	0.345021	0.096101	51.2213	46.7437	126.584	80.2283	55.3343	72.7477	139.153	0.180814	0.119495	0	0.082533	0.065297	0	45.4759	39.0541	105.36	158.927	9.06207	24.604	18.2791	26.9381	0.245991	0.073887	0	0	0	0.175611	0	0	13.504	0	63.6491	0.185594	0	0	0	18.7042	0	0.215561	0	0	0	0.082358	0.118231	0.10506
NOCLEBFK_00927	0	0.488561	0	0	0.108152	0.158508	0	0	4.5597	0	0	0	0	0	0	0	0	0	14.9347	0	0	0	0	0	0	0	0	0	0	0	0	0	0	0	0.203467	0	0	0.254799	0	0	0	0	0	0	0	0	0	0	0
NOCLEBFK_00928	47.4516	0	0	11.3015	0	0	5.80376	0	0	0	0	0	0	0	0	0	0	0	20.0577	0	0	0	0	0	0	0	0	5.68463	0	0	0	0	0	0	0	0	0.129916	36.2925	0	0	0.106881	0	0	0	0	0	0	0	0
NOCLEBFK_00929	48.5616	0	0	37.0106	0.10967	0.160733	0	0	0	0	0	0.155437	0	0	0.141899	0	0	0	0	31.3556	0	0	0	3.32758	20.3681	0	0	0.142472	0.118592	0	0.150964	0	0	172.362	42.0899	0	0	0	62.2203	250.108	0.131258	6.22045	0	0	109.577	0	0.141598	0	0
NOCLEBFK_00930	57.7282	10.6624	112.906	23.503	23.9536	34.2958	2.00665	73.5005	120.432	7.92305	285.168	60.6864	0	0	0	0.113259	0.06585	64.5857	26.1388	145.398	22.4358	8.40873	22.3589	40.4709	40.8348	30.0094	0.704869	0	20.1595	0.073381	0	0.097151	0	2.06345	0.104074	40.0201	0.160958	13.2937	0.141695	0	0	0	10.5625	0	24.9893	0	0	34.5036	0
NOCLEBFK_00931	107.448	0	0	0	0.099859	18.1479	0	0	0.127578	0	0	0	0	0.132098	0	0	0	10.8996	0	0	0	0	0.184294	0	6.497	0	0	0.129727	0	0.132462	0.274919	0	0	0	0.187866	0	0	0	0	0	0	0	0	0	0	0	0	0	0
NOCLEBFK_00932	1.83555	145.564	72.9456	4.62151	18.1566	44.3507	32.3286	59.6482	74.0383	0	0	0	0	0.109673	0	0.084869	0	9.04927	32.1388	56.832	128.392	32.6991	0.459024	19.2859	7.94399	0.74602	0.2881	0	0.089651	0	0.114124	0.145597	0	76.3915	43.2047	0.108851	0.120612	0	2.97297	0	1.38917	0	0.420258	0.108251	28.3543	36.9816	0	0	0.13655
NOCLEBFK_00933	232.301	0.416502	424.397	68.3422	8.57461	227.828	0.418052	83.1602	0	555.494	1.08429	0.392031	1.03633	0	0	0	0	127.261	47.3995	40.4941	566.254	126.131	84.7393	0	142.987	59.0233	0.320395	51.0251	0	0	0.38075	0	0	96.2013	8.06576	209.906	0.402395	126.421	0	0	0	0	0.467367	0.361157	0.32286	0	0	0	0
NOCLEBFK_00934	124.503	0.196923	0	4.33459	24.3246	69.0007	42.4961	4.12071	84.0409	4.30101	0.512655	0.370707	0	0.691994	0.507632	0.267746	0.31134	14.8164	13.2723	0.225244	18.9182	1.16932	0.241356	47.396	5.87869	0.672444	0	0	0.141417	0.34695	0.54006	0	0	0.131839	72.8259	56.1468	0.380507	120.315	0.167485	2.5101	0.782604	0.164837	2.4307	0.683024	0.305298	35.8343	0	0.121199	0.215395
NOCLEBFK_00935	135.687	0	0	0	0	22.6349	0	0.482769	0	0	0	0	0	0	0	0	0	0	0	0	0	0	0	0	0	0	0	0	0	0.487771	0	0	0	0	243.164	0	0	0	0	0	0	0	0	0	0	0	0	0	0
NOCLEBFK_00936	146.613	127.641	322.189	98.6166	53.184	194.987	23.0016	29.6486	2.71788	117.534	5.13192	9.04544	14.4082	9.09194	6.98725	4.18791	1.16875	65.7942	95.2905	36.6405	3.80452	23.8985	51.3418	144.544	253.397	25.0327	120.556	65.9025	69.0129	13.6755	9.46094	1.7243	2.57763	94.1983	17.3943	72.4055	1.19033	258.886	86.1355	148.765	9.00937	17.3261	233.923	0.213669	307.719	82.1715	30.8476	3.03315	11.8592
NOCLEBFK_00937	39.626	0	13.4851	0.593066	0	0	0	46.617	0.502921	0	0	0	0	0	0	0	0	0	4.58451	39.5953	0.101688	0.078216	0	0	0	0	0	0	0	0	0	0	0	14.7626	2.44391	0	0	0	0	0	0	0	0	0	0	0	0	0.072964	0
NOCLEBFK_00938	31.1331	124.928	47.9408	0.096297	0.255672	0.093679	54.4853	7.55252	0	52.8245	0	0	0	0	0	0	0	32.5871	1.48879	0	56.964	10.2236	0	0.107744	1.13417	1.56113	1.85095	0	2.28089	0	0.17597	0	0.12585	28.8031	73.3522	31.9736	0.092987	0.978813	1.06416	0.111529	6.1965	28.3588	0.108001	0	0.074608	0	0	0	0.63165
NOCLEBFK_00939	197.361	0	170.324	13.3033	72.7434	0.205421	0	0	1.79067	0	0	0	0	0	0	0	0	0	0.69957	0	0.543096	0.835475	0	0.472527	0	0	0	0.182083	0	0	0	0	0	0	0	0	0	0	0	0	0	0	0	0	0	0.17863	0	0	0
NOCLEBFK_00940	247.354	25.435	214.383	26.851	41.4971	0	125.236	57.2749	243.67	0	0.260691	0.188508	95.428	0	0	0	0.15832	99.4163	4.86822	3.43617	18.8967	43.7368	45.9017	9.19215	26.275	0.854862	10.4762	0.69114	0.287648	0	0.183084	0	0	8.04496	35.1561	95.8692	0	17.8609	0.170336	0	0	0	98.8828	0	2.48396	0.169508	0	0.123262	121.141
NOCLEBFK_00941	403.79	4.70647	1.18639	6.19598	0	0.241099	0	31.7484	131.355	0	0	0	0	0	0	0	0	0	0	0	0.424949	0.163431	0	0.277299	0	0.211466	0	0	0	0	0	0	0	0	23.2113	0	0	0	0	0	0.196887	0	0	0	0	0	0.212397	0	0
NOCLEBFK_00942	73.5835	23.3968	0	17.715	11.6984	6.24266	0	27.4882	0	0	0	0	0.112385	0	0	0	4.85595	0	9.58183	0	0	0	3.65369	10.3149	12.845	0	0	0.233807	0	0	0	0	0	2.23771	15.0673	0	0.087276	1.20137	0.384154	0	0	31.532	0	0.078331	0.070025	0.152915	0.077458	0	0
NOCLEBFK_00943	43.2215	0.078181	0	0.312887	0.20768	32.7967	4.31594	7.021	0.066332	0.27541	0.712353	0.073587	0	0.137364	0.268713	0	0.123605	37.7326	2.59143	38.2736	36.4807	0.773717	2.20387	0.962714	0	0	7.33715	18.3462	1.34745	0.275485	0.07147	0	0.102227	0.157024	0.390711	0.068168	0	0.06116	0.465452	0	0.06214	0.327211	0	0.067792	0	0	0	0	0
NOCLEBFK_00944	50.6837	0	0	0	0.856325	81.2008	26.1437	84.4317	100.65	2.72543	0	0.121368	0	0.113279	0	61.2738	0	82.4647	33.7653	29.7927	51.6517	40.7502	0.316077	2.7426	0.101298	0	0.198381	12.237	0	0	0	0	0	0.431636	74.0261	42.7234	0	13.8195	0	27.7918	0	0	0	0	0	0	0.110563	0	0
NOCLEBFK_00945	192.088	53.8079	3.29553	109.187	108.756	220.739	157.052	245.012	108.003	44.6004	0	584.183	0	0	0	0	0.108787	45.0786	72.0721	98.8519	184.381	109.771	42.8413	4.00542	87.3534	98.919	79.3961	8.66704	81.6305	0	0.125803	0.160497	0.179944	19.44	11.1758	175.907	0	67.6081	32.0699	66.0192	0.109382	4.72293	0.308845	0.238659	13.2278	0.582375	0	0	0.30105
NOCLEBFK_00946	117.423	202.645	78.4696	71.1672	27.4816	85.9995	74.1577	408.805	178.865	72.3876	0.115589	0	1.54667	0.078013	0.076304	0.060369	0.140397	81.2358	53.2769	129.606	118.445	74.3486	84.2404	17.5954	67.1808	19.6344	70.4282	3.37094	4.59151	0.078227	0.081179	0	0.116115	57.6682	20.3588	107.703	0.085794	77.2492	0.151052	0	0	0	0	0	29.7372	0	26.4976	0.218616	0
NOCLEBFK_00947	58.5695	0.818517	138.189	135.945	22.2868	0	2.87547	600.9	0	0	0	0	0	0	0	0.278223	0.323523	0	65.1148	357.173	0.70209	0.540032	0	193.796	52.0849	0.349378	80.5946	84.7398	0	0.360526	0.374128	0	0.535138	0	22.7538	0.356843	0.395397	0	0	0	2.27704	39.3962	0	0	0	0	1.40367	0.251884	0
NOCLEBFK_00948	131.926	105.217	68.2174	51.3381	1.3317	0	25.2183	80.7337	0.5004	0.083106	0.15354	0.222053	0.73374	2.69427	0.101357	0.561326	0.093246	91.7806	9.51404	0	69.6107	1.16736	0.289143	1.58456	63.4764	1.00698	0.090738	16.3843	0.338833	0.831289	0.646989	0	0.154238	25.6656	1.76848	33.6318	0.113962	1.84554	2.40775	33.488	2.15638	41.4696	2.25015	0.306847	2.37735	4.69228	0	1.59716	0.129021
NOCLEBFK_00949	49.978	0.196103	0	46.3046	20.4465	0	0	72.1539	139.096	0	0	0.184581	0.243968	0	0	0	0.155021	85.8292	97.0693	0	0	2.32889	0.9614	69.1513	101.524	0	0.150853	0	0.140828	0.172752	0	0.228709	0	72.6029	9.06531	36.2493	0.189461	0	52.5379	51.129	51.1249	75.5093	0	0	155.813	0	0	0.120694	0
NOCLEBFK_00950	83.6072	42.0852	39.4282	40.5001	130.197	148.996	119.873	97.6866	82.0445	70.7325	0	0	4.29651	0	0	0	0.06349	121.226	50.759	24.3444	13.3649	37.7285	66.7402	51.1583	77.1025	25.7801	22.9831	26.8156	0.461414	0.070752	0.073421	0.187338	0.105019	18.8196	5.31827	86.0655	0.232785	87.3338	20.0828	41.1359	14.5548	10.4877	27.1272	0.139286	32.8099	0.067977	0.275464	0.098862	0
NOCLEBFK_00951	0	0	0	0	0.658018	0	0	0	0	0	0	0	0	0	0.425698	0	0	0	0	0	0	0	0	0	0	0	0	0.427416	0	0	0	0	0	0	0	0	0	0	0	0	0	0.829393	0	0	0	0	0	0	0.54189
NOCLEBFK_00952	99.7482	0	0	0.159086	31.1503	64.2252	37.1855	0	10.1179	0	0	0.14966	0	0	0	0.108093	0	0	0	38.0107	0	0	0	22.9614	34.7254	0	25.808	0	2.9688	0	0	0	0	0.106451	0	0	0	0	0	0	0	0	0.17842	0	0	0	0	0	0
NOCLEBFK_00953	115.065	0.438832	20.0981	40.723	0	0	0.660698	41.7049	2.32704	62.5314	175.647	0	5.59592	0	0	0	0	4.22785	15.3944	0	21.6437	0.072382	0	0	18.6162	0.374625	0	0.094649	0	0	0	0	0.143452	0	4.2491	0	0	0.171648	0	0	0	0	0	0	0	0.092854	0	0.067521	0
NOCLEBFK_00954	57.4931	0	0	0	0	0	84.747	130.117	0	0	0	0.22261	0	0	0	0	0	0	44.4233	0	0	0	19.7111	0	0	0	0	61.0087	0	0	0	0	0	0	0	0	0	1.29512	0	0	0	0	0	0	0	0	0.202791	0	0
NOCLEBFK_00955	79.5531	59.4794	68.9997	26.6964	22.2729	282.608	0.185984	129.084	59.4263	37.5981	310.412	0	2.07469	1.30226	0.477654	0.377901	0	18.3619	126.114	1.27165	160.05	12.5919	48.5999	55.5907	69.5807	1.74002	30.3606	9.27189	10.113	0.652922	0.677555	0.216103	1.45372	61.7783	20.9511	318.763	0.358037	1.44955	0.157594	42.7283	2.50372	31.7961	0	1.92806	44.5267	106.957	9.53279	0.114042	55.1277
NOCLEBFK_00956	266.504	348.223	89.3941	255.488	120.744	345.884	340.802	976.788	352.376	429.789	702.876	0.395531	1375.81	108.166	329.067	0.285675	445.465	53.9806	134.027	510.616	88.0694	61.4567	128.587	164.646	185.86	183.912	72.948	135.711	61.7629	0.493578	1.0244	0.653454	2.38105	139.635	87.5905	262.099	0.135329	104.648	83.3935	209.872	55.222	93.3314	15.5608	0.728763	126.388	0.474219	0.600528	0.689681	0.306426
NOCLEBFK_00957	0	0	0	0	0	0	0	0	0	0	0	0	0	0	0	0	0	0	0	0	0	0	0	0	0	0	0	0	0	0	0	0	0	0	0	0	0	0	0	0	0	0	0	0	0	0	0	0	0
NOCLEBFK_00958	116.788	0	0	0	0	0	0	0	0	0	0	0	0.099749	0	0	0	0	0	0	0	0	0	0	0	0	0	0	0	0	0	0	0	0	0.053679	0	0	0	0	0	0.092909	0	0	0	0	0	0	0	0	0
NOCLEBFK_00960	153.737	89.5501	106.31	184.667	168.359	225.825	180.278	237.672	183.687	75.1912	128.982	167.979	144.482	141.249	161.437	81.8914	65.4609	183.476	159.939	107.376	138.131	68.8176	123.475	99.3928	62.6557	159.737	71.235	129.166	67.8712	101.522	117.33	89.011	64.7011	209.41	120.385	118.453	55.3021	57.4169	93.9056	111.139	161.463	145.553	75.222	70.1503	118.619	130.054	118.994	106.315	115.759
NOCLEBFK_00961	59.636	0	0	33.5943	0	0	0	0	0	0	0	0	0	0	0	0	0	0.52664	3.80498	0	0	0	0	0	0.22545	0	0	0	0	0	0	0	0	0	0	0	0	0	0	0	0	0	0	0	0	0	0	0	0
NOCLEBFK_00962	62.7247	0.259072	46.2202	10.0227	32.1161	9.32987	75.3238	123.106	103.603	0	0	0.162567	46.6271	0.075865	0.074204	0.176123	0.068266	41.4413	50.6656	33.6829	45.6294	33.2739	9.41995	0	15.9429	22.4115	19.4641	21.2335	4.09304	0	2.68411	0	0	0.115631	23.305	31.2483	0.083432	1.62136	0.073447	0.100069	0.137279	11.4936	0.096904	0	0	0.073091	0.148094	0	0
NOCLEBFK_00963	40.6601	0.455832	0	23.3737	20.812	29.7258	71.1458	44.9104	30.1665	0	0	0	0	0	0	0	0	36.0742	0	0	0.488743	12.7064	17.1795	0	48.3435	0.486423	12.9741	23.3992	0	0	0.625057	0	0	0	60.1546	103.934	0	0	0	0.396157	25.09	0	0	0.098815	0	0	0	0	0
NOCLEBFK_00964	59.5209	0.294768	0	13.7631	19.9672	32.42	3.45177	0	59.1893	0	0	0	0	0	0	0	0.077673	0	13.6789	0	57.2262	0	0.361278	0	0.154379	0	0.075584	0.084769	0.070561	0	0	0	0	0.920943	0	50.7179	0	4.91937	0.083568	0	0	0	0	0.0852	4.41758	0	0.084249	75.5913	0
NOCLEBFK_00965	65.8329	48.6106	0	69.5171	11.5213	0.167185	25.344	25.6097	0.437211	0.24204	0	0.080838	0	0	0.147596	0	0	0	18.0297	47.9392	0.073668	0	18.842	5.38404	20.4436	0	0.1982	0.074096	0.185029	0	0	0	0	1.95496	123.291	38.1164	2.48927	14.7139	2.99486	7.9617	125.196	154.206	0	0	26.8963	0	0.147283	0	0
NOCLEBFK_00966	6.56027	0	66.6936	3.88812	0	52.1128	0.216697	0	0	12.0165	0	0	0	0	0	0	0	0	0	0	1.48147	22.5055	0.793816	0	0	0	0	0	0	0	0	0	0	0	0	0	0	0	0	0	0	0	0	0	0	0	0	0	0
NOCLEBFK_00967	69.1353	75.7013	0	2.91822	21.3949	3.09693	6.65351	98.4849	1.12484	71.0826	0	0	51.79	0.116469	0.455677	0	0	33.4528	71.1907	0	0	8.22218	38.0227	108.045	2.60379	0.339537	9.99451	32.1404	100.634	0	0	0.15462	0.173355	0	0	8.20738	0	0.725997	0	0	27.0816	0.665851	9.07481	0	34.2222	0	0	0	0.145013
NOCLEBFK_00968	91.6099	60.0712	90.3904	15.9648	29.742	131.814	170.79	49.6867	50.9673	0.472356	0.349073	3.02902	11.3435	6.36102	1.49783	0.8204	3.81591	45.2761	44.4456	14.5703	105.814	25.9208	81.0205	12.0084	46.4543	3.54853	27.0245	43.7279	30.0432	0.944969	2.45155	0	0.876651	2.4238	22.1136	97.6234	2.46137	3.88115	6.61446	0.466133	122.563	8.08126	0.150463	0	1.45517	5.10698	18.2807	0.742733	7.1866
NOCLEBFK_00969	58.5018	0	0	6.31226	0	0	0.126649	0	0	0	0	0	0	0	0	0	0	0	0	0	0.108231	0	0.154649	0	23.8893	0	0.097063	0	0	0.111154	0	0	0	0.084476	0	0	0	26.9475	0.107316	0	0	0	0	0	0	0	0	0	0
NOCLEBFK_00970	104.451	213.438	129.689	55.9121	56.5145	119.175	101.358	168.773	58.3205	31.9244	0.069145	41.4495	14.4729	0.186667	0.09129	0	0.125977	131.308	60.6292	80.9323	143.437	68.7977	67.6452	24.9162	60.3016	36.9134	59.2105	0.229145	0	0.046795	0.048561	0.061953	0.277837	36.595	70.5491	125.982	0.307928	64.5777	0.180717	29.2386	28.0353	9.56001	25.989	0.046062	7.94723	12.5888	0.045548	0.228856	37.7671
NOCLEBFK_00971	0	0	0	0	0	0	1.52387	0	0	0	0.282315	0	0	0	0	0	0	0	0	0	0	0	0	0	0	0	0	0	0	0	0	0	0	0	0	0	0	0	0	0	0	0	0	0	0	0	0	0	0
NOCLEBFK_00972	76.7269	13.2199	141.628	20.0391	43.5998	21.3807	15.6136	37.9588	142.988	113.94	0.064691	0.046779	27.4522	0.043661	0	0.101359	0.078575	39.9468	40.0306	3.63816	0.852591	38.5607	62.8006	28.2628	8.16002	4.28514	21.868	13.4634	3.31919	0.394028	0.045433	0	0.064985	32.2747	55.1385	1.86335	0.144046	8.94218	0.042269	10.3086	8.72996	4.95052	28.8879	0.215474	11.2493	7.78181	0.085228	0.030588	13.6445
NOCLEBFK_00973	0	0	0	0	0	0	0	0	0	0.037767	0	0	0	0	0	0	0	0	0	0	0	0.318299	0	0	0	0	0	1.20241	0	0	0	0	0	0	0	0	0	0	0	0	0	0.717925	0	0	0.041553	0	0.091926	0	0.175898
NOCLEBFK_00974	63.4099	0	0	0	0	0	0	0	0	0	0	0	0	0	0	0	0	0	0	0	0	0	0	0	0	0	0	0	0	0	0	0	0	0	0	0	0	0	0	0	0	0	0	0	0	0	0	0	0
NOCLEBFK_00975	0.060543	0.061765	0.961411	0.061797	0.533236	0	0	0.269261	0	0	0.080397	0.69763	0	0	0	0.041989	0	0.340036	0.136487	0.353237	0.052979	0.203752	0.227102	0.207428	0	0.052728	0.332588	0	2.75002	0	0.169389	0	0.161525	0.372158	1.04177	0	0	0.241591	0	0.071572	0	0	0	0	0	0.209105	0.21184	0	0
NOCLEBFK_00976	0	0	0	0	0	0	0	0	0	0	0	0	0	0	0	0	0	0	0	0	0	0	0	0	0	0	0	0	0	0	0	0	0	0	0	0	0	0	0	0	0	0	0	0	0	0	0	0	0
NOCLEBFK_00977	0	0	0	0	0	0	0	0	0	0	0	0.52117	0	0	0	0	0	0	0	0	0	0	0	0	0	0	0	0	0	0	0	0	0	0	0	0	0	0	0	0	0	0	0	0	0	0	0	0	0
NOCLEBFK_00978	90.7164	94.5249	176.322	141.268	6.91656	6.80075	14.1587	114.37	28.1873	0.185767	0	0.248176	26.898	0.115817	0.113281	0.179247	0	49.3537	56.3713	101.484	2.71396	23.8325	59.9461	98.5847	46.1914	90.9363	30.5255	0.113738	50.2719	0.232272	0.241035	0.307508	0	0.176523	20.5066	20.6909	0	80.4436	0.112126	0	29.5496	31.6714	5.76943	0.114316	52.1188	0.111581	3.84338	0	0.865202
NOCLEBFK_00979	114.974	102.83	0	0	0	0.102024	0	0.365571	45.4459	0.073852	0	0	0	0.092086	0	0.07126	0.082862	0.096179	38.1035	67.5015	72.3786	6.98493	0	0	0.411736	0	0.241902	0.090433	0	0	0.095824	0	0	0.070177	6.15522	102.821	0	12.1361	0.089151	0	0	0	48.9309	0	1.54383	0	0	0.129027	0
NOCLEBFK_00980	120.408	272.123	343.225	68.0664	79.0351	144.624	218.736	182.877	189.326	58.7798	0.113239	0.245653	0.32469	0.076426	0.224259	0.118283	0.137542	68.4087	93.814	159.311	195.135	147.109	136.373	106.055	86.5913	130.562	124.876	101.924	36.6724	0.076637	15.2694	0.202921	0.113754	96.4502	256.022	114.312	0.084049	89.0856	0.961877	31.2508	30.2863	77.9185	93.7152	0.226307	102.706	49.0383	95.2568	9.95894	75.4589
NOCLEBFK_00981	59.5342	85.9491	153.496	19.8448	21.0605	3.49019	107.415	129.261	190.723	71.0559	0.437588	0	28.9974	0.098444	0	0.15236	0.088584	0.719742	61.1636	81.3909	118.708	94.3384	75.5386	23.709	0.528198	2.39158	25.1708	22.8158	4.18459	101.085	64.1274	0	0	10.6532	20.1607	39.4736	0.108263	47.2503	0.095307	0	0.356271	0	0	0	22.1505	10.0535	4.03555	0	0.12257
NOCLEBFK_00982	81.7022	36.7656	41.2972	3.95407	0	0.116562	0.240407	11.5901	86.57	0	0	0	0	0	0	0	0.189339	24.1745	16.4076	37.2587	0.719061	7.82222	0	3.75376	0.282243	54.7982	0	0	30.1865	0	0	0	0	8.49872	0	0.208839	0	0.093686	0	8.46513	0	0.801957	0.134383	0	0	3.95303	0	0	0
NOCLEBFK_00983	96.7427	0	0	0	0.233253	0	11.4574	0.918702	0	0	0	0	0	0.154279	0	0	0	0	19.9856	0	28.47	0	0.215239	7.86369	0	35.8308	1.48601	0	0	0	0	0	0	2.23388	0.438821	34.6058	0	0	0	0	0	0.147001	0	0	0	0	0	0	0
NOCLEBFK_00984	132.942	25.4433	22.0968	55.8299	60.4812	28.5906	13.7007	290.485	64.6694	77.8592	0	0.205566	2.03779	0.095932	0	0.148471	0	18.1355	78.3037	122.53	44.6788	25.7925	26.9014	26.8935	108.605	63.7636	18.4803	34.104	0	0.577177	0	0.127355	0	206.017	29.1281	62.6503	0.1055	22.2107	30.6486	151.212	1.38871	0.548438	12.9887	0.189377	29.542	27.08	3.55802	0.067208	68.4403
NOCLEBFK_00985	136.22	20.6054	2.10274	25.5361	4.97606	56.6343	0.117512	79.825	132.808	0.082486	0	0	152.207	0	0.1006	0	0	16.221	14.3586	27.5863	70.9993	31.2063	13.0578	12.4508	10.3932	0	20.0837	0.606037	0.084076	0.103136	15.7329	0	0.306173	0	44.1015	12.5561	0.113111	106.7	0.199149	0	0.093056	0.098	0	0	0	0.099091	0	0.072056	0
NOCLEBFK_00986	82.2304	53.8909	92.7036	149.895	58.8135	76.5811	150.014	117.311	206.976	2.78438	0	1.52174	17.4316	1.26249	0.771781	0.610603	1.13603	52.25	81.5747	36.7793	76.1178	113.659	22.8975	9.25034	70.7019	49.2264	8.01476	56.4123	2.19304	1.26597	5.74758	0.628513	0	63.3796	131.07	92.7246	0.520656	77.1501	13.4448	0.208159	6.5679	17.4426	0.604722	2.33649	1.67098	4.71323	4.15877	0.11056	1.57189
NOCLEBFK_00987	17.4591	0.825697	0.141237	4.48471	20.7589	180.365	23.0872	20.2606	23.2186	0.332425	0	200.958	3.3752	0.310877	12.4669	0	0	1.83994	5.3435	0	0	0	0.433714	0	2.40932	0	0.090738	0.305297	0	0	0	0	0	0	0	0	0	31.1896	21.7701	0	0	4.83812	0	77.9392	30.5398	0.099836	0.101142	0.145196	0
NOCLEBFK_00988	56.8386	0	0	0	0	0	0	0	0	0	0	0	0	0.685304	0.223433	0	0	0	58.8966	0	0	0	0	0	0	0.443962	0.200025	0	0	0	0	0	0	0	0	0.68017	0	0	0	0	0	0	0	0	0	0	0	0	0
NOCLEBFK_00989	155.307	8.62366	0.525033	46.3582	116.287	146.389	151.696	0.127439	121.036	0.10298	12.7471	1.65091	0.36368	0	0.627971	0.19873	1.61762	8.71737	45.3801	60.0192	18.0537	266.351	40.3071	30.9248	63.2689	0.499112	112.212	2.77422	0.839717	2.57519	1.06894	0.170466	3.63129	36.7936	0.456537	1.52933	0.564853	33.2738	2.36195	1.86309	1.3941	40.4973	89.2235	3.80224	0.113302	0.247419	0.125328	69.8077	0.159874
NOCLEBFK_00990	0	0	0	0	0	0	0.998026	0	0	0	0	0	0	0	0	0	0	0	0	0	0	0	0	0	0	0	0	0	0	0	0	0	0	0	4.34804	0	0	0	0	0.384068	0	0	0	0	0	0	0	0	0
NOCLEBFK_00991	119.907	81.7224	36.8323	42.8832	53.1145	93.1146	97.7732	116.759	97.5244	0.144485	0.266938	0.772104	0.127565	0	0.088107	2.64887	0.081057	76.1139	63.1041	129.364	166.142	36.058	42.1005	25.0233	74.1894	61.6246	16.4853	16.631	3.7554	16.6203	0	0.119586	1.34076	28.0084	4.03543	92.8025	0.198129	16.1231	0.523253	0	23.8795	0.08583	0.23012	0	0.158968	0.173571	3.78058	0	0.336467
NOCLEBFK_00992	1.43272	0.292327	16.276	20.9124	3.10617	0.142263	25.2337	0.127439	7.44074	0.10298	5.1369	0.550304	2.90944	20.8017	8.28922	5.96191	1.38653	34.0648	54.1008	4.34679	84.6269	0.67504	0.716571	21.5983	16.3052	9.23357	26.0853	4.16133	1.36454	6.43797	0.534469	0	1.33784	8.41556	0.547845	1.52933	2.40062	0.114343	1.11882	7.96046	9.17786	0.73409	42.8076	0.126741	11.4435	6.5566	0.50131	2.69875	2.39811
NOCLEBFK_00993	234.055	124.244	192.114	3.45762	0	18.5798	54.3424	7.3175	0.558489	0	1.92783	0	0	0.144569	0.141403	0.111873	0	0.150995	7.0911	7.9056	85.2573	46.0349	2.42031	11.2374	65.8031	1.26436	16.3301	13.6295	0	7.24834	0	0	0.430356	0	39.3727	1.0044	0.317977	3.08966	0.139961	1.90691	0	0	42.1022	0	0	0	0.282206	0	0
NOCLEBFK_00994	92.8141	6.69695	0	79.6612	28.785	21.7275	30.4352	0	0	11.9269	0	0	0.231433	0.163426	0	0	0	4.60862	22.4038	60.004	0	0	33.972	0	44.7194	0	0	8.34558	87.1015	0.163876	0	0	0	0	0	43.4699	0	0	0	0	0	0	0	0	0	0	61.4105	0	0.203476
NOCLEBFK_00995	0.16565	0.506981	0.101173	5.41064	12.233	11.7606	10.347	29.1005	0.071691	331.058	0.109986	0	0	0	0	0	0	23.7243	0	0.096649	0	13.4354	0.207124	8.22934	0	2.09188	0.064999	0	2.97331	0	20.7013	0	0.220973	20.8177	16.9966	1.25247	0	15.8643	0	0.979131	0	0.070729	0	0.146538	0.065499	4.57703	41.5147	19.2417	0.092423
NOCLEBFK_00996	73.8137	63.9204	0.655273	8.43229	1.16301	0.53266	27.6848	69.4738	0.18573	0.46269	0.854823	0	64.8162	0.480775	1.03455	0.967309	0	66.4841	30.2334	0.500776	69.2865	8.95448	4.56106	8.45438	19.0028	0.467192	3.11528	2.54958	33.5628	2.21766	0.300173	7.78674	0.286237	72.9846	1.09399	31.7798	0.105746	0.085624	1.11709	2.02931	2.5229	0.274857	0.614098	0.094909	2.96956	1.76013	0.09385	0	0.11972
NOCLEBFK_00997	86.5753	38.5075	46.8393	23.5447	2.0296	2.9746	253.991	85.5348	225.849	151.586	0	0.287659	0	0	0	0	0	3.92586	50.9884	13.9827	139.198	10.6867	95.8903	14.027	21.8482	0	61.1247	125.241	0	0	0.279382	0	0	217.292	46.7743	0	0	99.9358	0	0	5.10116	0.511638	0	0.265005	0	0	0	0	0
NOCLEBFK_00998	30.6555	11.3446	8.07672	29.2967	26.2671	6.86386	70.7829	12.6982	26.7947	30.7832	0	0	0	0	0	0	0	0.281332	4.06526	1.57818	3.28747	71.0045	0	15.1024	56.4845	14.658	26.1805	0	24.0003	0	0	0	0	64.9689	2.39422	71.9149	0.296226	2.03881	0.260775	0	0	0	0	0	0	0	0	0	0
NOCLEBFK_00999	40.2482	0	0	1.93784	0	0.471284	14.969	0	1.06814	45.0313	1.13449	0.091151	0	0	0.249638	0	0	41.9405	7.27592	0	0	12.2674	0.593457	7.58862	9.89013	0	0.074495	0	0.069544	0	0	0	0	0.194503	0.060496	0.168876	0.093561	0.075758	0	0	0	0.162124	0	2.60315	0	0	0	0	0.105925
NOCLEBFK_01000	41.7916	62.107	145.525	20.4978	10.0509	55.5095	3.70509	41.84	0.548086	0	0.480489	0.086862	0.459235	1.05394	0.079297	0.125473	0.656561	27.3502	26.8164	48.45	0	0.730631	1.01795	11.3638	0.072498	1.41806	0.496926	4.21968	0	4.55253	2.69959	1.50679	0	0.061783	0.288245	26.151	1.24821	26.7836	0.39244	0.106936	0.66015	0	0.414215	3.0408	0	8.43553	0.395642	0.056797	0.10094
NOCLEBFK_01001	16.3045	2.14627	1.10137	20.4003	3.10522	3.65575	14.926	31.5451	32.0626	4.21243	1.79596	0.505043	3.24232	2.49157	2.70048	3.5956	1.75725	4.92332	1.86324	3.15635	6.2462	0.556303	8.8311	3.68979	1.44523	6.21655	0.412756	2.44685	2.58719	1.82318	1.5416	0.446988	2.40551	4.51601	5.17151	2.74025	0.370282	0.059965	0.651936	1.42118	3.65555	1.28326	0.602096	1.1964	0.713025	1.42729	1.24879	0.377415	0.335371
NOCLEBFK_01002	53.8986	0	0	0	0	0	0	0	0	0	0	0	0	0	0	0	0	0	0	0	0	0	0	0	0	0	0	0	0	0	0	0	0	0	0	0	0	0	0	0	0	0	0	0	0	0	0	0	0
NOCLEBFK_01003	31.4207	0	0	0	0	77.0083	0	0	0	0	0	0	0	0	0	0	0	0	70.2722	0	0	0	0	0.284793	1.79873	0	0	0	0.548085	0.224111	0	0	0	0	103.142	0	0	0	0	0	0	0	0	0	0	0	0	0	0
NOCLEBFK_01004	36.1932	42.9043	0	39.0244	8.46153	0	11.2227	0	0	0	0	0	0	0	0	0	0	44.8546	42.8078	0	0	0	32.8257	0	0	0	0	0	0.186733	0	0	0	0	0	0	0.906893	0	0	0	0	87.2176	0	0	0	0	0	0	0	0
NOCLEBFK_01005	125.947	35.8038	10.8904	48.245	44.391	67.027	94.19	0.881128	158.748	0	0	0	0	0	0	0	0	0	33.0193	3.13753	49.7816	6.85807	0	11.3131	0.113417	0	0	0	0.31103	0	0	0	0	169.726	24.2603	86.8573	0	0.11294	0	0	1.836	29.9701	0	0.125186	0.223823	0	0	0	0
NOCLEBFK_01006	93.8912	78.2341	126.222	70.1938	36.895	30.2368	88.2955	67.5346	141.717	0.036479	0.067395	0.097469	0	0.045486	0	0	0.122789	38.0537	67.2185	11.0154	67.4613	20.1205	36.3619	31.7048	37.8687	0.088402	6.33282	0.312686	30.4522	0	0	0.060385	0	11.7857	24.2583	76.3404	0.100045	0.28353	10.7889	0.059997	9.87683	0	20.2186	0.044896	0	0.131467	0.044395	0.095599	0.169899
NOCLEBFK_01007	46.6507	0	0.126353	0	34.5496	0.410841	0.741433	45.9118	73.507	49.07	0.274719	0	0	0	0.090676	0	0.08342	9.48897	41.1581	75.5598	24.5299	8.70287	60.5294	0	24.4558	0	21.1058	0.091041	0	0.557765	34.1497	0.123072	0	43.2371	0.197765	8.64904	0	0	0	0	0.083876	0	0	0	32.0659	0	0.090483	0	0.115425
NOCLEBFK_01008	34.8073	0	0	0.563945	0	0	0	0	0	0	0.36684	0	0	0	0	0	5.79242	0	0	0	0	0	0	0	0	0	0	0	0	0	0	0	0	0	0	0.24573	0	0	0	0	0	0	0	0	0.218462	0	0	0	0
NOCLEBFK_01009	31.2147	0	14.1117	14.2127	3.42104	0.455809	0	0	0.264889	0	0	0	0	0	0	0	0	19.6228	16.0402	0	0	0	13.7753	11.0965	0	0	0	0	25.6152	0	0	0	0	0	0.292547	0	0	0	0	0	0	0	0	0	0	0	0	0	0
NOCLEBFK_01010	51.2595	0	2.75506	104.643	19.1703	32.168	2.93937	45.5949	0	0	0	0	0	0	0	0	0	1.15159	62.8639	0	104.783	0	3.8456	32.7828	0.164328	0	0	41.1459	0	0	0	0	0	80.1039	78.664	0	0	0	0	0	0	0	0	0	0	0.177042	0	0.12874	0
NOCLEBFK_01011	55.3603	125.506	0	0.392412	0	373.342	1.181	0	0	0	0	0	0	1.03367	0	0	0	0	26.434	0	0	1.55259	14.9017	0.439056	0	0	0.905115	0	1.12662	2.07303	0	0	0	3.41352	2.20507	36.9332	0	0	0	0	0.311737	0.328301	0	0.340089	0.304026	0	0	0.241388	0
NOCLEBFK_01012	33.4431	4.41708	155.565	48.9181	40.3595	0	0.7644	115.138	1.03384	0	0	0.143364	0	0	0.130878	0	0	0.139756	35.8456	121.43	0	3.21572	28.3753	27.6222	46.9053	0	0.234334	0.262812	0	0	0	0	0.199161	42.6244	40.8189	46.482	0.147154	0	0	0	0	0.127496	22.9025	0	0.236137	0	0	0	0
NOCLEBFK_01013	193.625	0	0.138802	18.5574	25.0201	8.34939	50.4978	206.289	30.6866	0	0	0	0	0.101839	0	0.078807	0	0.106366	9.47809	0	80.5415	0.076482	5.96731	38.9311	0	0	0	15.3017	0.083248	0	0	0	0	0	0	34.9724	0	0	0	5.37316	0	0.19407	0	0	0.08986	0.098114	0.099398	0	0
NOCLEBFK_01014	18.9148	0	153.281	0	25.161	63.6742	0	0	213.436	0.165797	0	0	0	0.206733	0	0	0	0	0	0	189.336	0	1.15368	54.5308	9.6132	0	0.181023	76.3364	0	0	0	0	0	0	0	0.205185	0	0	1.20087	151.069	0	0	0	0	0.364831	0.398344	0	0	0
NOCLEBFK_01015	45.454	0	47.8682	0	0.051155	26.7655	0.154631	0	0	0.054271	0	0.362516	0	0	0	0	0	0	3.82989	0	79.551	36.2356	13.2173	16.9874	0	0	11.7324	5.51583	37.5048	0.067857	0	0	0	0	0	0	0	1.74752	8.51678	0	0	0	0.086436	0	0.059711	0.065195	0	0	0
NOCLEBFK_01016	176.775	283.244	319.166	128.426	55.266	74.5434	120.032	393.753	112.172	0.602898	0	216.665	0.266147	0	0	0.145435	0.169114	77.7321	95.7299	50.897	75.0518	212.564	94.1298	5.26867	38.9906	14.4277	0.164566	0.184566	0	0	0	0.499001	0	84.6457	13.0968	44.208	0.206685	112.464	0.545848	0.247898	0.170039	0	4.32102	0	0	0.181066	0	0	0
NOCLEBFK_01017	91.4283	403.615	633.55	64.4983	117.636	181.014	140.288	111.666	232.089	420.421	0.742574	0	0	0	0	0.193913	0.225486	1.57035	95.8086	3.58889	370.182	120.443	29.0168	75.9966	3.58534	2.92207	0	8.85916	0	0	0	0	0.372975	0.190966	87.3121	496.92	0	308.382	0	0	61.894	84.0451	32.0075	0	87.1173	0	0	0.35111	0
NOCLEBFK_01018	65.5582	0	0	0	0	0	0	0	2.88981	0.218154	0	0	0	0	0	0	0	0	0	0	2.39034	0	0	0	0	0	8.0984	0	0	0	0	0	0	0	0	0	0	0	0	0	0	0	0	0	0	0	0	0	0
NOCLEBFK_01019	44.9831	0	0	0	0	0	0	0	0	0	0	0	0	0	0	0	0	0	0	0	0	0	0	0.131388	0	0	0	0	0	0	0	0	0	0.157154	0	0	0	0	0	0	0	0	0	0	0	0	0	0	0
NOCLEBFK_01020	79.3806	0	0	0	0.043653	0	0	0	0	0	0	0	0	0	0	0.044687	0	0	0	0.075186	0	0	0	0	0	0	0	0.05671	0	0	0	0	0	0	0	0	0	0	0	0	0	0	0	0	0	0	0	0	0
NOCLEBFK_01021	33.3465	0	0	0	0	0	0	0	0	53.8841	0	0	0	0	0	0	0	0.234698	3.10878	0	0	0	3.762	0	4.62173	0	0	0	0	0	0	0	0	0	0	0	0	0	0	0	0	0.428219	0	0	0	0	0	0	0
NOCLEBFK_01022	304.883	277.272	816.819	370.062	336.51	365.475	225.16	244.428	84.4214	119.122	0	0	2079.25	0.22471	0	0.173889	0.202202	70.4095	155.722	381.222	411.161	509.824	139.194	232.222	90.8271	169.012	45.059	106.145	105.437	0	0.701491	0.894947	0	179.295	457.154	382.045	0.494246	142.471	44.8149	5.6316	0.203307	40.0385	34.7299	66.0956	18.0433	0.216491	24.3449	0.787136	163.112
NOCLEBFK_01023	72.5575	16.5721	38.0981	179.294	30.9624	64.5194	60.5469	9.44006	263.776	0.467034	0	0.207979	0	0	0	1.65236	1.57205	156.721	76.6593	123.589	310.831	116.772	18.4155	68.5175	77.9402	67.7187	36.2046	27.8322	2.2215	0	0.605982	1.2885	0	141.866	53.6948	52.404	0.213477	40.6213	0.375858	0.256045	0.175627	0.184958	0.991783	0	0.513847	0	0	0	0.725063
NOCLEBFK_01024	236.38	96.1465	301.894	373.128	129.489	263.728	251.946	354.467	408.447	93.3201	0.291725	0.21095	0.278821	0.196889	0	0.15236	0.177167	447.679	168.138	62.5492	180.897	161.617	298.858	189.672	255.824	108.291	122.578	345.718	211.805	17.3739	41.1808	0.261381	0.293052	272.031	309.971	277.683	0.216527	130.618	11.0556	39.7345	245.471	207.862	156.677	0	93.4663	13.8472	0.192169	111.039	125.757
NOCLEBFK_01025	170.046	0	0	5.83753	0	0	0	0	0.330016	0	0	0	0	0	0	0	0	0.356897	2.57858	0	0	1.53976	0	0	0	0	0	0	0	0	0	0	0.508602	0	181.752	0	0	0	0	4.05652	0.618322	0.651176	0	0	6.6333	0	0	0	0
NOCLEBFK_01026	96.9114	38.6941	0	50.7239	22.6552	3.84302	51.8371	0	0.134	0	0.205578	0	0.196485	0	0	0	0.124849	0.434743	0	132.958	0	75.9624	69.1047	0	0.248147	35.9989	0	0	55.348	0	0	0	0	0	0	0	0.152586	10.3784	0	0	0	0	0.177223	0	0	0	0	0	0
NOCLEBFK_01027	103.8	0	0	0	0	0	0	0	0	0	0	0	0	0	0	0	0	0	0	0	19.2676	0	0	0	0	0	0	0	0	0	0	0	0	0	0	0.466329	0	0	0	0.309873	0	0	0	0	0	0	0	0	0
NOCLEBFK_01028	41.1268	0	0.218424	37.051	0	99.0748	7.32402	58.8492	25.0736	2.95607	0.237451	0	0	0	0	0	0	0.167382	20.3571	62.1796	0.156474	53.077	9.39042	0.408424	186.302	0	0	0	0	0	0	0.212752	0	0	0	54.0797	0.176243	0	0	0	0	37.8692	0	0	62.2193	0.154397	0	0	0
NOCLEBFK_01029	49.8329	174.273	0	41.0922	0.147433	16.422	0	102.395	38.2367	408.08	0.288973	0	0.276191	0	0	29.279	0	0	0	0.253931	0.190425	2.05059	0	0.248522	0	6.44372	0	0	0	0.195569	0.202947	0	0.290287	71.3421	72.6704	35.617	0.214484	0.173672	0.188816	0	0	0	0.249115	0.192503	0	0	0	0	0
NOCLEBFK_01030	187.959	4.5215	22.6398	101.787	55.0048	65.0125	36.5129	42.2897	0	0	108.614	0	0.255687	0	0	0	0	39.4129	40.6474	96.853	86.7342	33.2214	101.262	0	102.203	2.45633	0	1.24118	0	0	0	6.71145	0	0	0.770332	1.2544	1.19137	0	0.349597	0.238156	0	0	61.1148	0	0.159315	0	11.2784	0	0.449603
NOCLEBFK_01031	227.133	86.9164	0.215914	86.9621	44.4288	130.23	94.8418	1250.56	164.777	5.336	0.234722	158.358	0	0.158416	0	0	0.285097	66.845	27.2958	56.1022	203.243	81.9721	177.693	0	9.34971	1.84729	17.0619	14.3127	0	0	17.6385	0	0.235789	13.8835	57.1123	259.429	0.174217	39.3576	0	0	73.527	0	0	0.312726	5.87085	0.152622	0.154619	0.110983	0.197239
NOCLEBFK_01032	49.6687	18.3931	0	81.3691	32.5731	0.175513	120.181	192.599	225.669	94.7775	0.234722	0	0.224339	0.316833	0	0.122589	0	112.677	24.3072	0.412516	263.875	102.911	141.889	27.6555	1.84161	0.307881	0.416145	0	6.34533	0.158853	0	0	0.471578	1.69016	0	226.253	0	20.8779	3.68082	27.7912	175.29	256.301	0.202346	0	54.515	0	0	0	0
NOCLEBFK_01033	0	0	0	0	0	0	0	0	0	0	0	0	0	0	0	0	0	0	0	0	0	0	0.3036	0	0	0	0	0	0	0	0	0	0	0	0	0	0	0	0	0	0	0	0	0	0	0	0	0	0
NOCLEBFK_01034	42.3955	0	0	0	0	0	0	0.162195	0	0	0	0	0	0.817128	0	0	0	5.97414	6.98833	0	9.73352	0	0	0	0	0	0	0	0	0	0.085029	0	0	0	0	0	0	0	0	3.34124	0	0	0	0	0	0	0	0	0
NOCLEBFK_01035	2.83028	0	1.38291	1.73335	0.191754	0.281036	0	0	0	0	0	0.815328	0	6.34151	0.992425	0	0	0	0.638054	0	0	0	0.707779	0.323231	0	0	0	0	0.414707	0	0.527911	0	0	3.28626	0	0	0	0	0	2.34211	0	0.483388	0	0	3.13352	0	0	0	0
NOCLEBFK_01036	0.200581	0	0	0	0.951265	0.796675	0.616173	0.178415	0	0	0	0.577819	0	0.719072	0	0.417334	0	0	0	0	0	0	0.5016	0	0	0	0.314823	0.176541	0	0	0	0	0	0.136997	0.12783	0.356843	0	0.16008	0.174039	1.1856	0	0	0	0	0.158622	0	0	0.881592	0
NOCLEBFK_01037	0	0	0	0	0	0	0	0	0	0	0	0	0	0	0	0	0	0	0	0	0	0	0	0	0	0	0	0	0	0	0	0	0	0	0	0	0	0	0	0	0	0	0	0	0	0	0	0	0
NOCLEBFK_01038	0	0.28698	0	0.861392	2.95406	0.279322	0.576096	0	0	0	0.373551	0.270119	0.714054	1.7648	0.123297	0	0	0	0.951245	0	4.30779	0.09467	0.175866	0	0	0.122495	0	0	0.206089	2.78089	0.393519	0	0	0.384261	1.34456	1.87669	0	0.224503	0.610196	1.49646	4.21986	1.56143	0.322027	0	1.55721	0	0.123035	0	2.35425
NOCLEBFK_01039	279.947	0.21393	0	0	0	0	0	83.5629	179.875	0	0	0	0	0.187939	0	0.145435	0	0	0	0	0	0	0.5244	0	57.3095	5.47889	0	0	0	0	0	0.499001	0.279731	0	0.133641	0	0	0	0	0	42.6797	0	0	0	0	0.181066	0	0	0
NOCLEBFK_01040	2.21305	0.694682	0.415893	0.695047	0.692011	1.18325	0.348634	0.302844	0.736752	0	0	2.61547	4.53727	0.152571	0.89538	0.354195	1.23559	2.07158	0.383774	0	0.148967	0	0.851424	0.583248	0.27287	0	0.133596	3.14647	0.997745	0.611963	2.69897	0	0	0.930167	0.216982	0.151428	0	0.135861	0.147708	1.40872	0.138039	0.726866	0	0	0	0.881943	0.297826	0	0
NOCLEBFK_01041	35.6238	0	0	0	0.184946	0	0	0	0	0	0	0	0	0	0	0	0	0	0.15385	19.9088	16.6019	0	0	18.7053	0	0	0	0	0	0	0.127292	0	0.182074	0	0	78.9172	0	1.19823	0	0	0	14.1034	1.09375	0	0	0	0	0	0
NOCLEBFK_01042	84.4767	0	0	8.8215	0	15.1084	18.0733	0	80.3907	0	0	0	0	0	0	0	0	38.9686	0	0	0	0.491586	0	0	15.9992	21.3084	0	0	0	0	0	0	0	0.166277	0	0.108277	0	0	0	0	0	0	0	0	0.096262	0	0	0	0.13583
NOCLEBFK_01043	176.043	112.176	264.135	47.3783	16.7784	26.5579	50.7177	112.784	197.21	0.101716	0.187921	0	0	0.12683	0	0.098146	0.228252	37.4884	21.8533	0.825665	0.371505	21.5267	112.36	82.7472	72.4733	36.3579	14.6595	1.12098	0.103677	0	0.131978	0	0	14.0149	8.92853	0	0	0.45176	0	0.167293	0.2295	0.241694	84.2407	0	0	0	0	0.088855	0
NOCLEBFK_01044	42.0145	76.7203	20.7013	2.88303	35.8804	73.5044	2.4102	124.258	36.2647	1.69181	0	0	0	0.105476	0	0.081621	0.189822	19.7195	65.0018	74.9822	148.608	29.4676	22.073	48.117	42.4445	61.0877	35.7428	31.4892	16.6406	0	0	0.140026	0	20.1757	25.8759	79.5614	0.231993	0	0	0	10.4018	0.402002	0	0.104109	0	0	0	0	0.131325
NOCLEBFK_01045	19.8363	0	0.138461	8.21462	0	0	0	42.8502	60.7319	0	0	0	0	0	0	0	0	0	0	0	0	0	0	0	0	0	0.088955	0	0	0	0	0	0	0	0	0	0	0	0	0	0	0	0	0	0	0	0	0	0
NOCLEBFK_01046	47.386	10.2222	2.37994	11.506	4.00716	39.6595	19.4517	3.15657	0.120458	0	142.483	0	0	0.062363	0	0.048259	0	2.86594	12.0003	0.649573	2.25293	49.8328	40.5441	15.655	7.86322	0	1.80204	0	21.6148	0	0	0	0	0	0	0.123792	0	0.610864	0	0.082259	3.94961	0	0.079657	0.061555	0.110055	0	0	0	0
NOCLEBFK_01047	125.64	1.50206	14.3881	77.6475	96.0951	205.165	116.09	317.369	258.708	185.904	0	0	0	0	0	0.340379	0	15.1605	23.2347	0	11.1662	372.622	119.05	37.5533	0	0.427431	0	2.15981	21.9331	0	0	0	0	9.38578	125.736	316.072	0	0	0	152.589	0	100.167	0	0	0	0	0	0	0
NOCLEBFK_01048	167.14	0	36.3372	74.8799	88.302	0	51.112	0.448474	0.218207	0	0	0.484147	0	0.225938	0	0	0	0	75.5867	0	0	62.1037	0.315213	41.1705	0	7.02575	0	19.7475	94.9316	0	0	0	0	0.516548	68.1204	0	0	0	7.43706	94.7703	44.7675	25.6183	0	0	0	0	0	0	0
NOCLEBFK_01049	191.027	0.174314	195.15	0	0.231525	38.3437	60.3621	0.455949	0	0	0	0	0	0.459407	0	0	0	0.959656	14.6374	0	0	0	31.1921	0	48.7507	0	0	0	0	0	0	0	0	5.83508	0	0	0	0	1.03779	1.21195	0	0.437735	0	0	0	0.147535	0	0	0
NOCLEBFK_01050	56.3047	6.11471	0	0.926957	12.7977	11.7227	0	0.161557	0.786062	227.677	0	0	0	0	0	0	0	0	1.02365	6.14633	34.0127	0	0	0	30.1322	0	0	0	0	0	0	0.216103	0	0	47.4583	0	0.179018	49.7194	0	0	0	0	0	0	21.5452	0	0	0	0
NOCLEBFK_01051	3.18602	0	0	0	0	0	0	0	0	0	0	0	0	0	0	0	0	0	0	0	0	0	0	0	0	0	0	0	0	0	0	0	0	0	29.1574	0	0	0	0	0	0	0	0	0	0	0	0	0	0
NOCLEBFK_01052	161.987	244.858	128.653	16.8068	28.1403	138.605	49.6702	15.9655	96.2989	189.041	0	0	0	0	0	0.205759	0	27.6325	0.167207	8.65488	1.94711	52.4187	34.6846	35.7457	2.85329	39.5326	3.02675	0.261122	0	1.9997	0	0	0	9.72638	54.0752	98.5678	0	48.0652	0.12871	0.175362	0.120285	0	71.1524	0.131224	0	0.128085	0	0.09314	0
NOCLEBFK_01053	125.614	591.122	401.825	2250.57	1278.43	790.451	1549.16	588.545	269.758	291.406	182.455	56.3374	583.615	0.44942	0.879159	0.347778	1.41541	1150.26	1218.92	1638.7	960.327	589.985	1071.23	927.172	888.176	443.492	569.436	920.221	270.205	0.675987	1.40298	1.49158	1.67231	778.145	1693.75	1113.8	2.47123	1224.81	266.279	581.241	2861.55	1897.44	1623.98	0.887189	1331.83	50.8755	2.63188	490.071	1.67868
NOCLEBFK_01054	118.016	0	0	0	0	0	0	0	0	0	0	0	0	0	0	0	0	0	0	0	0	0	0	0	0	0	0	0	0	0	0	0	0	0	0	0	0	0	0	0	0	0.305397	0	0	0	0	0	0	0
NOCLEBFK_01055	141.175	130.662	89.8503	270.484	226.791	158.697	274.784	293.331	69.4202	199.884	137.433	0.123915	0.163783	0.115655	0.169684	0.223745	0.156105	123.453	124.585	34.7093	155.609	100.669	87.0504	76.1194	27.5106	11.8007	50.889	3.7481	6.75972	36.7636	22.2646	0.076769	0.172142	145.252	56.0881	202.028	0.127191	42.4828	0.167953	0.228829	22.9683	16.5299	25.9261	0.114156	56.6892	0.167137	0.112882	0.162051	0.287997
NOCLEBFK_01056	37.2658	0	22.0514	6.68088	25.1048	48.9536	19.9986	52.3037	109.836	0.07588	0	0	0	0.094615	0	0.073216	0.170275	9.78322	15.2315	40.7754	0.18476	5.7556	0.264	31.9496	0.084608	5.14874	0.994177	17.3754	0	0	0.098455	0	0.140826	12.9787	1.07647	7.70029	0	11.4584	0	45.8016	0	0	21.6325	0.093388	0.166971	0.091154	0.55408	0.066285	0
NOCLEBFK_01057	0	0	0	0	0	0	0	0	0	0	0	0	0	0	0	0	0	0	0	0	0	0.326861	0	0	0	0	0	0	0	0	0	0	0	0	126.27	4.31968	0	0	10.9553	0	0	0	0	0	0	0	0	0	0
NOCLEBFK_01058	166.332	319.208	396.902	140.521	70.0953	413.318	277.226	274.407	240.226	465.134	0.277834	146.359	30.5375	0	0.091704	0.145105	0.253096	164.512	114.733	196.046	46.8697	306.927	188.225	90.6785	156.699	107.963	54.9226	70.3443	77.7904	0.470074	0.097562	0.124467	0.418645	139.827	122.138	210.954	28.7671	8.26536	38.6674	1.97869	14.9295	41.6295	33.7712	0.092541	61.2189	41.1893	90.0449	0.459787	0.466934
NOCLEBFK_01059	6.53861	1.85294	73.2152	16.8706	9.4752	37.152	34.407	87.4021	22.3242	72.063	0.48238	0	0.461043	0	0	0	0.146477	41.1443	0.81892	117.628	0.635751	28.4846	164.876	0.414856	51.5305	46.3477	26.7971	74.1751	0.133065	0.16323	0	0.648308	0.242287	0	416.707	280.473	0	91.3213	0	169.41	169.958	243.667	0	0.160672	24.5615	0	0	0.68425	0.202675
NOCLEBFK_01060	102.684	0	119.251	29.4689	23.3915	55.7094	9.75275	68.0393	5.28132	0	0	0	0	0	0.130456	0	0.240033	0.557219	70.118	53.3124	18.6224	0.100167	38.1459	0	10.6151	23.1999	0	65.0981	0	0	0	0.177065	0	74.4029	8.06157	245.957	0.146679	1.30646	0	0	0	0.127084	0	0	0	0.128498	0	0	0
NOCLEBFK_01062	707.977	5.9591	455.342	22.3888	175.178	120.855	152.584	281.416	77.9034	72.6594	2.37451	18.544	1.66428	55.5562	0.1045	0.744084	0.865236	85.1416	98.3592	3158.09	363.957	278.664	203.906	119.941	1794.04	1405	93.4584	74.7038	84.7148	0.107133	0.22235	187.364	3.49845	129.864	12.9911	39.4463	0.939962	177.337	41.477	6.20066	128.271	42.0429	25.5192	0.949086	50.7182	1.6469	0	0.898189	0.931154
NOCLEBFK_01063	241.646	0.266656	323.913	42.0203	2.30213	52.5568	0.267648	55.1013	102.828	254.755	0	3.13736	56.7278	0.234259	0.114565	0	0.105397	48.5673	0.589251	0	22.987	11.6114	6.69984	0.447762	7.43667	0.11382	0.102563	0.230054	0.095747	0.822163	0.121883	0.310992	0	173.079	225.713	33.3643	0	29.6216	0.226793	141.056	125.366	3.57132	4.18909	0	3.10055	389.768	344.565	0.164117	47.3961
NOCLEBFK_01064	82.252	0.760861	0.260293	6.30759	6.56878	4.12597	9.38252	1.70586	0.922216	2.374	0.42445	11.0493	6.76125	7.16166	0.93398	1.62564	2.06218	2.6928	9.48755	0.124326	0.279701	1.29084	7.32707	26.4042	2.81787	1.11349	0.668907	0.937748	2.65393	5.93661	4.57076	0.126767	0.568507	1.30986	1.29011	0.947735	0.735091	1.1054	4.52983	12.3434	1.03672	9.82629	1.9515	3.67579	1.43236	4.78381	6.80358	1.53864	2.25892
NOCLEBFK_01065	23.8833	0	0	0	0	0	0	0	0	26.8503	0	0	0	0	0	0	0	0	0	0	0	0	0	0	0	0	0	0	0	0	0	0	0	0	0	0	0	0	0	0	0	0	0	0	0	0	0	0	0
NOCLEBFK_01066	358.13	0	166.043	38.8961	14.8809	228.168	142.352	171.36	179.045	0.063402	0.117136	0.084703	96.953	0	0.077326	0	0	73.7357	61.4472	99.8439	81.2807	47.7355	70.9193	56.3133	28.0662	1.69011	34.0586	36.2568	3.1666	1.34766	22.2939	0.209905	0.117669	72.1162	53.4053	132.37	0.260826	54.1365	30.3087	0	0	9.41591	0	0.234096	56.2245	0.076165	0.077162	0.110771	0.196862
NOCLEBFK_01067	136.613	103.075	40.4572	26.4522	15.1738	87.8464	65.4267	9.48881	32.2453	12.3645	0	0.375419	88.4666	0.100113	0.293763	0.193678	0.090085	13.2272	6.04375	0.260694	54.446	18.7965	32.4036	17.8599	26.3651	4.42645	1.35877	21.1871	0.163674	0.250972	0.208352	0.132906	0.074505	45.7001	182.066	32.0943	0.055049	17.5623	0	0.990393	72.9601	1.09699	0.127875	0.098815	39.5749	0.048226	0.195426	0.035069	0.311619
NOCLEBFK_01068	195.369	52.7695	18.3576	59.932	55.6449	83.6358	74.0807	54.4029	47.1923	27.3816	28.7747	95.311	99.8053	159.122	61.2747	21.3304	26.2127	70.3384	52.7893	50.1629	41.2877	20.9365	46.322	38.3176	22.9686	14.0016	24.685	78.4405	67.3412	46.172	26.4016	51.1476	25.642	33.8965	65.7068	19.2749	24.8022	36.5395	40.6354	86.7644	62.0641	57.602	26.0061	12.6761	65.5038	54.3197	77.6537	22.3833	57.7194
NOCLEBFK_01069	320.584	0	0	45.8897	0	0	0.300891	0	34.082	7.81464	0	0	207.731	3.16025	0	0.203794	0	0	14.9049	0	0	0.197782	8.45052	1.00675	99.6175	0	3.45904	5.6898	4.52083	0	14.5243	0	0	0.401394	0	117.622	0	0.469025	0	0	0	1.50559	0	0	1.16188	0	0	0	0
NOCLEBFK_01070	232.699	124.322	28.354	80.2593	220.167	185.252	55.856	37.1641	254.912	54.64	0.385298	0	156.14	0	0	0	0	250.416	319.204	349.748	202.359	22.4589	170.15	196.83	143.477	19.7102	125.008	325.091	86.7285	0.260758	45.7307	0.345221	0.387049	339.469	127.589	16.518	0.285979	262.592	114.548	451.05	547.481	534.945	215.9	13.8602	735.629	0.501062	0.253808	0.18218	0.647541
NOCLEBFK_01071	402.781	0	168.79	36.2226	128.63	53.0765	0.681345	0	68.921	0	0	0	0	0	0	0	0.357742	53.1502	0.250007	28.2108	209.032	73.8974	0	109.173	9.24347	0	0	0	44.1982	0.199329	0	0	0	101.8	7.91566	152.31	0.218609	119.306	0.192447	9.4392	0.539545	0	0	0	30.5195	0	0.194017	0.139263	0
NOCLEBFK_01072	281.318	77.0776	77.8534	50.1052	55.62	70.4944	98.5857	89.5795	53.1939	39.9855	0.05605	0.121591	0.107141	0	0.074001	0.08782	0.102118	6.51916	50.3362	63.9795	49.4562	45.7965	24.9102	23.6198	47.359	33.3412	47.5993	9.39884	24.3672	0.037933	9.36861	0.200879	0.056305	21.6789	41.425	67.9944	0.124805	84.5173	4.06515	1.09774	2.49846	0.18022	25.319	0.074676	1.50205	14.3593	0.073844	0.079506	139.32
NOCLEBFK_01073	105.324	0	0	22.5674	0	23.3366	0.356528	0.15485	0	0	0	0	29.8286	0	0	0	0	0	0	0	0	0	0	0	0	0	0	0	0	0	0	0	0	0	0	117.536	0	0	0	0	0	0	0	0	0	0	0.152285	0	0
NOCLEBFK_01074	0	0	0	0	0	0	0	0	0	0	0	0	0	0	0	0	0	0	42.6678	0	0	0	0	0	0	0	0	0	0	0	0	0	0	0	0	0	0	0	0	0	0	0	0	0	0	0	0	0	0
NOCLEBFK_01075	225.303	0	0	241.47	34.1634	439.445	45.0427	2.38578	0	0	0	0.51511	0	0.480775	0.470248	0.372042	0	108.463	0	0	76.0461	0	20.7931	65.5521	214.534	0	0	175.638	0	0	0	0	0	0	243.071	321.615	0.528728	0	0	0	0	0	0	0	0	0	0	0.673642	0
NOCLEBFK_01076	170.438	0.373529	51.2101	0	0	25.6311	63.7364	0	0	0	0	0	0.464702	0.164074	0	0	0	0	0	57.8922	119.829	32.1608	0.228905	0	0.146722	0	0	0	0	0	0	0	0	0	26.7176	65.7894	0.180439	0	0	0.216419	0	0.312668	0	0	0	0	0	0	0
NOCLEBFK_01077	119.751	1.40193	87.0482	0	0.532014	0	0.201021	0	0.339846	0	0	0.188508	0	0	0	0	0.15832	0	8.18745	86.1334	98.2627	0	45.1653	0	0	0	39.9021	0	0	0	0	0	0	76.6952	0	0.698501	0.193492	0	0	0	0.159185	0	0	0	0	0	0	0	0
NOCLEBFK_01078	99.1419	296.969	101.657	140.345	57.854	133.834	92.2567	400.055	336.211	0	0	288.381	104.706	0.162144	0.47578	0	0.145903	363.935	764.727	149.045	41.0034	60.6424	270.775	603.521	81.0525	1.10294	0.141979	181.367	336.528	0	14.5103	0	0.72401	7.90824	144.238	203.253	0.178316	87.2092	16.1685	0.641619	82.0053	84.3541	11.3909	0	26.8974	33.4297	0.158257	0.113595	0
NOCLEBFK_01079	281.126	3.67693	17.1702	6.62195	77.4071	164.983	260.927	260.639	0.311968	293.254	0.957224	0.34609	201.731	0	0.315948	0	0	227.731	15.8442	223.745	4.73088	143.857	95.5391	14.4065	14.7318	83.496	0.282849	71.0578	0	0	0	0	0.480788	12.0622	0	130.485	0	46.023	0	0	0	211.139	0.412597	0.318834	0.285024	0	0	0.226302	0.402184
NOCLEBFK_01080	142.901	0	2.29079	0	0	0	0	0	0	0	0	0	0	0	0	0	0	0	0.845551	254.286	0.656425	0	0	0	0.601201	0	0	0	0	0	0	0	0.500332	0	0	0	0.73936	0	0.325438	0	0	0	91.0263	0	0	0	0	0	0
NOCLEBFK_01081	353.436	0	85.2288	71.9962	86.5348	126.069	196.377	0	0	0.274045	0	0	0	0.341708	0	0	0	0.356897	36.1001	299.865	0.667275	5.90241	0	0	58.9748	5.97697	5.38581	1.67787	0.279327	0	1.42231	0	0	231.243	0.485967	2.03489	0.751581	0	0	32.0014	0	0.325588	0.436466	0	0	0	0.667033	0	0
NOCLEBFK_01082	1.59081	0	0	0	1.07779	0	0	0	0	0	0	0	0	0	0	0	0	0	0	0	0	0	0	0	0	0	0	0	0	0	0	0	0	0	0	0	0	0	0	0	0	0	0	0	0	0	0	0	0
NOCLEBFK_01083	11.6242	287.206	2.21864	0	0	0	0	138.292	0	0	0	0	0	0	0	0	0	0	0	0	118.885	0	81.3026	0	75.1123	0	0	0	0	0	0	0	0	0	84.962	68.5026	0	0	0	0	0	0	0	0	0	0	0	0	0
NOCLEBFK_01084	126.728	0	0	0	0.376577	0	2.27662	66.2499	0	0	0	0	0	0	0	0	0	0	0	5.18876	0	0	0	0	0	0	0	0	0	0	0	0	0	0	0	0	0	0	0	0	0	0	0	0	0	0	0	0	0
NOCLEBFK_01085	127.939	1.41451	1.38574	46.8321	81.9826	4.00514	0.258142	120.752	2.50938	0.996595	185.126	2.54177	3.19959	2.82423	0.220991	0	0.101653	64.5408	31.826	0.735429	87.6893	0.424205	1.89128	21.1611	33.135	0.109777	1.4838	0	116.263	0.566401	0.117554	0	1.34516	70.5088	0	111.114	0	0	13.8898	0.44703	0.102209	7.96534	0	1.22655	0.199361	1.19721	0.110261	0.237431	0.421963
NOCLEBFK_01086	263.986	0	0	39.5682	0	14.6334	0	0	0	0	0	0.307635	0	0	0	0	0	0	0	198.511	0	54.9876	42.0612	0	0.256763	0	19.8623	0.281976	0.234713	0	0	0	0	11.1596	0.204174	5.98455	0	0	0.277978	0	12.7293	0	0	0.283408	99.8219	0	0	0.201157	2.14498
NOCLEBFK_01087	86.2757	93.9257	0	37.1008	47.2897	28.9527	61.7595	104.187	15.385	0.143547	0	0	127.117	0.53697	0	0	0	39.6325	30.0528	12.0018	105.12	46.5105	16.3563	5.93011	69.7061	53.2235	0.235095	0.087888	0.073157	0.089741	0.093127	0.11881	0.133205	35.4651	12.6641	2.84238	0	23.1111	0.086643	0.708281	4.93921	0	0	0	1.18452	0	0.08735	0	0.222855
NOCLEBFK_01088	87.2093	14.8543	16.2882	24.2487	21.1834	100.749	11.9277	162.506	12.0724	32.2781	20.5565	10.155	9.33726	9.34078	13.3013	9.1416	15.8215	15.2078	52.8652	29.3311	14.6191	40.5428	51.3598	10.5023	86.5999	10.8122	44.9851	13.0852	13.0254	119.423	11.864	12.9475	22.6945	7.32777	11.2329	152.423	96.0775	2218.52	1394.63	989.468	12.0552	2559.57	8225.05	2309.8	5127.15	96485.9	86912.4	5506.06	139382
NOCLEBFK_01089	259.76	99.4122	178.261	61.6007	17.8605	0.093487	58.7124	228.123	177.738	17.8655	0.125025	0.090407	0	0	0	0	0.075929	0	49.3483	0	6.09672	34.7907	22.485	68.7078	61.4973	1.31195	0.073887	8.1209	0.137953	0	0	0	0.251187	37.6827	55.7419	61.3879	0.092797	27.2006	0.735224	0.222603	3.1301	0	34.382	0	4.76514	0	0.082358	0	0.10506
NOCLEBFK_01090	266.707	114.365	11.5736	17.9862	18.5375	151.143	65.1929	90.5771	113.051	0.254583	0.58793	2.63586	20.5664	0.317441	1.55245	0.429883	0.214233	5.47059	38.2275	17.5656	16.5045	22.4098	30.5581	31.1469	14.6902	56.5275	35.3707	11.8462	67.9864	0.875366	3.96389	0	0.826845	29.3927	23.9271	103.104	0	22.8967	11.0636	7.53687	5.95951	1.51233	0.101367	0.234994	0.420151	0.229373	1.93644	0.778373	0.098809
NOCLEBFK_01091	80.3617	5.85598	0	188.575	70.8658	91.1954	373.348	181.917	101.762	128.817	0	0.40829	0.269827	0	0.745462	0	0	86.17	178.051	47.3833	111.623	49.7974	169.065	85.4642	87.9194	62.9525	74.0776	28.629	74.1389	0.191062	0	0.25295	0	11.326	112.32	35.9309	3.35267	61.0813	0	139.234	90.332	0.363098	49.1618	0.188068	0.504375	0	0.37194	0	0
NOCLEBFK_01092	229.485	0	0	0	330.991	0	380.342	372.475	0	158.995	0	0	0	1.06017	0	0	0	0	178.671	115.949	0	0	596.068	0	0	126.717	0	0	0.866631	1.06309	0	0	0	3.23174	1.50774	0	0	0	0	0	0	0	326.354	0	363.896	0	0	0	1.31999
NOCLEBFK_01093	302.53	34.6951	275.626	209.186	8.81575	115.109	71.1627	224.905	321.503	236.367	1.57083	0	256.355	0.265043	0	0.2051	0	114.882	159.004	706.39	3.36418	0	0	107.4	291.051	55.6318	61.5014	95.2643	0.216658	0	0	0	0	102.002	0	0.789172	0.291478	71.2767	0.769786	43.3504	0.239798	0.252539	0.338541	0.784821	2.8064	0	123.912	0	0.329997
NOCLEBFK_01094	56.2939	62.4728	23.4806	105.671	95.8141	82.6194	126.535	15.3883	21.8675	146.059	38.6536	101.52	40.0805	38.1472	49.1073	25.5203	18.3811	50.3819	64.6922	13.4583	235.493	14.9714	54.5938	62.7223	47.978	20.3284	12.4992	99.0943	79.8693	44.422	57.1102	59.1376	23.4441	78.586	110.254	22.7169	38.1629	44.4889	26.9242	40.254	50.1006	106.229	22.0052	8.01639	63.6283	76.8235	77.8284	13.7936	49.9474
NOCLEBFK_01095	0	0	0	442.641	85.0854	92.1266	169.014	0.911897	0	0	0	0	0.650582	0.459407	0	0	0	269.663	359.387	180.641	47.9956	0	88.4488	239.432	308.526	201.785	14.4818	156.102	121.675	159.853	89.3959	0	0	471.941	307.731	0	0	0	20.904	0	0	112.498	0	0	149.986	0.442605	0.448394	0	0.571995
NOCLEBFK_01097	89.5046	46.5011	0	25.6595	177.99	205.454	183.302	48.8984	0	0	0	0.265266	0	0	0	0	0.222785	2.32731	28.9589	0.322355	0	68.4256	71.5005	0	52.0291	0	0.216794	10.6982	0	0	0	0	0	0.188679	0.176054	0	0	1.76376	0	0	1.79202	68.1766	0.316242	0	0.655386	0	0	0.173453	0
NOCLEBFK_01098	116.806	283.39	0	22.0419	122.363	514.618	143.73	530.84	0.849616	2.11656	1.30345	0.942542	0	0	0	1.36152	0	0	2.21283	587.585	0.85894	43.6047	133.778	0	0	433.415	125.561	260.905	0.719119	0.882139	0	1.16787	2.61876	338.559	0.625553	0	1.93492	582.828	0	616.159	0	0	650.604	0	0	0	0	361.158	0
NOCLEBFK_01099	76.8167	0	0	0.22212	32.5827	1.29648	50.3595	0	55.754	0	0	0.20896	0	0	0	0.754613	0.87748	82.295	0.24529	7.87186	20.5659	60.346	0	0	1.22083	0	0.853882	0.191531	0.318855	0	0	0	0	1.33766	0.138684	104.141	0	0	0	6.94583	19.9394	0.371662	0	0	0	0.563695	0	0	0
NOCLEBFK_01100	0	0	0	0	0	0	0	0	0	0	0	0	0	0	0	0	0	0	0	0	0	0	0	0	0	0	0	0	0	0	0	0	0	0	0	0	0	0	0	0	0	0	0	0	0	0	0	0	0
NOCLEBFK_01101	68.3131	0.90509	0	0	0	0	0.30282	0	0	0	0	0	0	1.06017	0	0	0	52.0429	0	0	0	0	0	0	0.474024	0	0	0	0.433315	0.531545	0	0	0	0.201983	0	0	0	0	0	0	0	0	0	0	0.701599	0	0	0	0
NOCLEBFK_01102	0.536437	0	84.5302	0	0	0	0	0	0	0	0	0	0	0	0	0	0	333.927	19.3494	0	0	0	0	32.4697	6.44893	0	0.420984	0	0	0	0	0	0	0	109.399	85.4141	0.528728	163.97	0.465452	0	0	0	0	0	0	0	0	0	0
NOCLEBFK_01103	21.3368	157.078	112.003	0	92.2048	2.86305	84.4413	321.615	30.9473	0	0.765779	4.42995	30.74	16.0218	0.505517	0.399945	0.930128	130.633	9.10025	820.959	0.504627	305.472	70.6629	2.63434	96.132	163.727	1.35767	1.52267	0	8.81036	5.37809	11.6641	2.30778	27.1769	2.9401	22.5703	0	7.82392	0	12.9527	0.467606	2.95471	1.98047	7.65201	18.6976	7.96689	3.02666	0.724165	15.4439
NOCLEBFK_01104	120.562	619.999	0	1.88358	0	0	37.1621	4.92424	2.66213	0	0	0	0	0	0	0	0	0	117.87	0	2.69134	117.169	34.6104	0	0	3.75	0	0	0	0	0	0	0	0	265.393	0	0	0	0	0	0	0	0	0	0.486442	0	0	0	0
NOCLEBFK_01105	67.9044	0	0	0	0	0	0	0	0	0	0	0	0	0	0	0	0	0	0	0	0	0	0	0	0	0	0	0	0	0	0	0	0	0	0	0	0	0	0	0	0	0	0	0	0	4.0282	0.453432	0	0
NOCLEBFK_01106	318.492	376.692	313.075	366.077	335.827	391.071	559.88	800.494	843.895	71.7226	0.90759	0.164072	197.994	0.153136	0	0	0.826781	196.729	280.422	468.35	474.275	290.852	118.786	127.619	285.931	95.982	147.098	179.562	187.394	58.0447	90.9894	0.60989	0.911717	149.611	210.489	182.082	0.33682	95.0461	1.48255	96.9558	38.9325	36.1861	14.0833	0	47.8334	154.764	157.685	0.429135	49.7635
NOCLEBFK_01107	224.412	0.797707	0	0	177.999	0	0	0	0.676813	0	0	0	0	0	0	0.542298	0	12.443	0	344.899	494.021	0	0	20.5389	0	0	0	0	0	0	0	0	0	0	0	0	0	225.903	0	0	0	0	0	0	0	0	0.683991	0	0
NOCLEBFK_01108	131.673	0.490257	2.64157	25.752	26.3721	0	0.246041	0.427452	193.628	0	0	0	30.1911	0	2.52758	0.166644	0	22.4919	153.025	171.594	1.05131	142.968	189.276	242.03	81.8432	28.4598	0	96.0127	69.0055	0.21594	0.448175	0.285886	0	95.8411	0.459391	81.2189	0	104.894	0.625451	0	0.194836	0	7.42675	0.425112	0	70.1252	0	167.765	2.94935
NOCLEBFK_01109	298.122	644.28	176.245	244.452	534.712	156.772	264.995	110.027	237.842	104.895	0	0.176492	0	0	0.322242	0.764835	0.296455	631.079	458.897	444.822	669.887	192.62	390.229	426.951	308.901	181.364	109.191	85.5768	166.3	0.660726	40.1107	0.656057	0.490365	284.463	578.298	216.793	0.543474	337.82	72.4028	156.008	306.571	398.827	766.937	2.92666	343.465	0.158703	0.482336	65.7807	0.820391
NOCLEBFK_01110	15.5567	391.294	9.8291	148.934	182.084	107.597	0	156.507	237.734	87.5254	0	0.51511	0	0	0	0	0	0.502145	0.604667	0	36.6148	137.567	85.1845	22.0549	255.378	141.092	34.9417	0	0.393007	0	1.50086	0	2.14677	94.8946	202.046	387.942	0	0	0	0	0.869965	0	0	0	0.424223	0	0.46925	0	0
NOCLEBFK_01111	67.7486	721.768	359.401	324.357	69.506	321.943	405.338	1241.68	321.131	319.072	0.856816	0	69.6078	0.578275	0.565613	0.671236	0	91.2009	185.096	308.318	233.469	90.3326	214.197	175.008	199.866	217.47	51.1422	256.972	103.287	231.657	0	0.383847	0	94.7486	63.7364	557.299	1.58988	172.763	58.5038	0.381382	25.1134	61.436	110.795	0.856169	234.462	0	136.588	1.21538	1.07999
NOCLEBFK_01112	431.189	0	0	148.728	43.0155	100.235	3.27405	0	0.395366	0	0	0	0	0	0	0	0	1.71028	0	211.602	0	0.922332	73.6756	7.30311	0	0	0	0	0.33464	0	0	0	0	167.53	0.291099	2.03153	0	0	0	259.189	0	0.390061	0	0	0	0	0.399559	0	0
NOCLEBFK_01113	150.103	401.678	253.413	99.2136	120.502	234.518	128.35	437.883	254.995	75.495	0.642163	0.092871	0.245503	0.086681	0.084783	0.067077	0.389991	111.175	138.125	374.238	268.881	151.744	97.7121	50.0358	104.023	123.905	44.4778	25.1118	55.835	0.086919	0	0.460294	0.387049	40.7575	37.6604	244.759	0.190653	76.1841	23.7488	0.228669	11.8421	15.0317	43.0693	0.513342	2.29454	59.0418	5.07616	0.303633	1.18716
NOCLEBFK_01114	127.636	21.0222	32.8729	43.4792	44.3833	0.152696	34.4851	0	0	0.221063	0	0.59066	115.739	0	0.134804	0	0.372051	19.2891	6.06683	82.3651	43.1961	0.724543	0	20.021	48.559	26.25	0	7.44415	0.225324	0	0.860495	0	0	0	61.0561	21.476	0	0	0.13343	0	0	0.262641	0	0	0	0.132781	0	0	0
NOCLEBFK_01115	1019.65	0.960504	43.7027	124.931	0	903.088	0	0	0	0	0	7.23257	1.19495	0	0	0	0	16.745	0	468.021	0	0	30.6078	0	0	133.655	0	0	0	0	0	0	1.25594	0	0	0	0.927972	0	0	0	0	0	0	0	0	0	0.823581	0	1.0506
NOCLEBFK_01116	577.293	0	409.705	335.353	89.5438	1.23808	493.465	33.8265	0.539621	0	0	0	0	0	0.546504	0	0	0	112.435	73.4753	433.707	77.6296	190.201	113.917	214.348	0.542953	0	94.9267	0.456738	11.7658	0	0.741758	0	3.40642	0	276.722	0.614468	0	0	52.3266	0	0.53238	0	0	0	0.538303	0	0	0
NOCLEBFK_01117	278.083	11.7662	5.47881	83.7145	5.64342	3.8174	20.9955	23.9373	4.99149	2.30274	101.253	372.239	34.1556	4.01982	7.30191	25.3299	10.3348	185.334	11.5559	3.73843	6.16766	31.9144	32.0467	10.2446	12.8381	16.183	22.6279	16.3546	45.5342	19.0027	2.98783	25.158	17.9494	87.0885	3.26678	5.12962	11.3677	9.20461	6.67148	11.362	40.0063	21.3396	36.6753	26.0735	5.57381	17.7042	50.4444	14.4833	59.3444
NOCLEBFK_01118	533.487	572.806	673.037	321.592	113.617	561.646	222.542	554.853	880.774	413.157	0	0.20995	0	0.391912	0.76666	0.303276	0.176328	212.239	252.121	473.274	555.233	360.996	305.096	259.688	284.576	110.824	23.3357	127.587	73.524	0	0	0	0.874989	409.772	139.62	478.829	0.431001	104.522	14.418	0.516944	205.835	183.911	98.3663	0.580247	183.28	42.6663	0	0.274565	0.243979
NOCLEBFK_01119	52.1968	0	0	0	0	0	0	0	0	0	0	0	0	0	0	0	0	0	0	0	0	0	0	0	0	0	0	0	0	0	0	0	0	0	0	0	0	0	0	0	0	0	0	0	0	0	0	0	0
NOCLEBFK_01120	96.8235	143.518	10.088	60.8965	60.8717	133.75	150.322	241.399	44.1223	0.204688	0.378162	0	65.7811	0.127613	0	0	0.114831	84.7696	73.0267	39.3781	44.1081	89.3219	88.4844	41.4664	91.8641	59.0277	5.36365	23.0593	79.9066	0.383894	0	0	0.379882	133.526	0.453719	100.819	0.280683	47.614	0.123546	17.1692	50.3398	10.7002	32.6003	0.125959	0.112602	0	0.124554	0	0
NOCLEBFK_01121	316.136	0	3.55917	0	0	0.964396	35.3056	249.236	0	0	0	0	0	0	0.425698	0	0	0	0	0	187.403	0	2.4288	0	0.389199	0	166.541	0	0	0	0	0.577791	0	57.0486	0	179.267	0	0	0	0	0	0	0	0	0	0.41931	0	0	0
NOCLEBFK_01122	182.681	162.364	393.117	49.9261	109.333	153.8	110.796	88.8276	69.2795	0.399511	0.246033	0	37.624	0	0	0.128496	0	95.0406	56.5959	0	229.575	35.666	76.217	51.4172	24.7977	4.19535	44.9286	0.32614	31.3553	0	0	0	0.247152	18.6019	174.045	14.1734	0.182613	181.874	0.160759	66.8031	0	0	0	0.163898	0.439556	0	0.16207	0.116332	0.206745
NOCLEBFK_01123	88.2748	0	0	0	0	0	0	0	0	0	0	0	0	0	0	0	0	0	0	0	0	0	0	0	0	0	0	0	0	0	0	0	0	0	0	0	0	0	0	0	0	0	0	0	0	0	0	0	0
NOCLEBFK_01124	134.731	0	0.960571	0	0	0	0	0	0	0	0	0	0	0	0	0	0	0	0	0	0	0	0	0.898069	0	0	0	0	0	0	0	0	0	0	0	0	0	0	0	0	0	0.223842	0	0	0	0	0	0	0
NOCLEBFK_01125	0	0	0	15.2722	0	0	0	0	0	0	0.827869	0	0	0	0	0	0	0	0	247.342	0	0	0	0	0	0	0	0	0	0	0	0	0.831633	0	0	0	0.614468	0	0	0	0	0	0	0	0	0	0	0	0
NOCLEBFK_01126	124.713	2.06878	0	0	0	0	0	0	0	0	0	0	0	0	0	0	0	0.474555	114.289	0	0	0	0	53.8447	0	0	0	0	0	0	0	0	0	235.109	0.646176	0	0	0	0	0	0	0	0	0	0	0	0	0	10.7485
NOCLEBFK_01127	0.381269	136.916	5.58878	7.39421	22.8607	87.2639	0	4.40876	31.1865	0.411067	0	0	48.8743	0	0.334226	0	0	0.178448	59.0925	105.22	4.17047	85.0717	70.0789	77.0707	1.9862	44.9933	0.149606	0	0.558655	0	0	0	0	113.538	94.1561	61.8945	0	0	65.8326	0	0	0	0	0	0	0	0.667033	0.119697	0
NOCLEBFK_01128	0	0	0	138.884	0	0	0	0	0	0	0	0	0	0	0	0	0	0	0	0	0	0	0	0	0	0	0	0	0	0	0	0	0	0	0	0	0	0	0	0	0	0	0	0	0	0	0	0	0
NOCLEBFK_01129	68.1675	0	0	0	0	0	0	0	0	0	0	0	0	0	0	0	0	63.8099	0	0	0	0	0	0	0	0	0	0	0	0	0	0	0	0	0	0	0	0	0	0	0	0	0	0	0	0	0	0	0
NOCLEBFK_01130	110.319	66.943	0	17.8413	49.6987	56.0518	0.880247	0.254878	0.248025	0	0	0.275152	0	5.39304	0	0	0	9.65616	2.58392	0	0	2.31442	0	106.355	2.52616	0	0	3.78302	0	0.257519	0	0	0.382241	0.195711	0	24.4692	0	0.228686	0	0	104.326	0.489393	0	0	0.67981	0.247419	0	0	0
NOCLEBFK_01131	453.49	54.5887	498.556	121.247	95.3622	128.701	131.918	86.3976	115.857	0.225574	0.208375	0.301357	0.199158	0.140635	0.275111	0	0.253096	64.6299	127.881	147.584	157.911	42.353	186.394	107.166	56.4669	6.28643	21.1809	91.5672	134.16	0	0.292685	0	0	101.066	109.104	2.65205	0	31.8091	0	14.8402	31.8099	0.134001	22.4543	0.138812	0.372277	0.135491	0	0.098526	0.1751
NOCLEBFK_01132	155.606	142.903	0	0	0.103155	0.302368	18.0852	1.89602	100.818	0.109437	0	0.292406	0	0.955203	0.13347	0	0.613946	15.6775	29.8622	11.0154	0	0	2.09414	1.56495	0.122026	2.78465	0	0.134008	0.111547	0.136833	0	0	0	0	0	0	0.150068	2.43026	0	0.359984	0	0.520081	0	0	3.49179	0.657334	0.532746	0	0
NOCLEBFK_01133	53.9732	0	0	41.2417	42.4916	0	118.254	1.34102	1.82695	201.991	0	0	0	0	0	0.209122	0	0	5.43806	0.351852	4.74943	77.1222	0	0	0.241659	11.8172	0	0	0	0	0	0	0.402228	0	0.192163	2.68215	0	0.240643	0	83.4105	0.2445	6.95226	0	0	0	0	0	0	0
NOCLEBFK_01134	161.756	110.289	6.63813	48.6237	72.2253	194.372	75.6549	223.792	229.884	20.0286	1.38186	0.111026	101.55	0	0	0	0.093246	134.316	45.6153	59.0953	239.894	34.6317	37.2994	44.7639	6.76464	91.8366	37.2935	2.74767	0.084708	0	26.7422	0.137569	0.154238	6.39665	0	53.7903	0.227923	48.7221	18.6601	60.2784	0.187511	0.296212	0	0.102282	141.726	2.89523	69.5854	0	0.129021
NOCLEBFK_01135	47.8422	107.029	10.8533	0.11627	2.70112	74.4252	8.74813	0	87.6531	0	0.151265	0	0	0	0	0.079001	0	0.106628	24.9093	0	0	0.076671	0.14243	0	0.091293	0	2.86061	2.20567	0	0.102372	0	0	0	38.7449	64.3192	0	0	0.09091	10.872	0	138.735	12.4511	7.43286	0	0.720655	55.9649	0.199286	0.071522	89.104
NOCLEBFK_01136	201.651	5.82072	65.8121	15.0586	30.0962	148.838	51.7469	70.7606	27.5149	0	0	233.551	0.206899	0	0.071451	0	0.065733	64.5479	40.7007	0.095112	2.06844	94.2527	20.9945	78.3785	76.4301	33.7897	7.80382	1.07609	0	0.073252	0.076015	0.096979	0.217459	0.501033	39.7381	18.6334	0	50.9994	0	0.192712	0.132185	0	1.95947	0	0.064458	0.281515	0	0.051178	0.090953
NOCLEBFK_01137	299.493	89.3464	180.514	181.084	250.809	71.3202	175.709	362.312	66.0663	236.16	0.249034	0.360158	0	0.168076	0.493187	0	0	224.875	140.573	270.918	116.351	76.3673	48.7735	173.695	64.3285	0.326655	4.26802	0.165059	66.2233	0	0.349795	0	0	63.1469	66.8096	129.95	0.55452	26.9403	0.162719	0	121.502	2.88265	6.44054	0	19.428	0.161929	0.328093	53.6942	0
NOCLEBFK_01138	81.2352	94.5679	106.582	124.597	106.289	245.404	109.591	196.129	55.9295	182.48	0	0	3.45496	0.256812	0	0.099365	0.115544	221.958	126.289	288.226	90.3941	46.2884	117.876	54.323	49.4899	118.04	42.1638	0.630504	110.633	0	56.3865	0.170466	0.191121	36.5979	57.615	89.4656	0.282426	40.7061	0.124313	0	4.87937	0	0.164014	0.253483	0	0.247419	0	0.179917	0
NOCLEBFK_01139	27.8817	10.9665	0.273561	46.0608	26.2488	193.687	32.2194	145.018	135.691	0	0	0	0.142118	0	0	0.077659	0.180607	33.2269	68.7883	176.265	23.7126	0.075369	78.2654	36.8296	31.0509	0.292562	0.087875	10.0526	0.082035	26.4663	0	0	0.149371	0	0.499532	34.9611	0.110366	39.2313	14.185	0	0	4.3986	22.0479	0.099055	0.088551	0.096686	0	0.210922	0.12495
NOCLEBFK_01140	169.878	77.1385	121.862	1.69998	9.98607	0.248062	48.519	43.8501	49.4464	0	0.110582	0.159926	0.10569	0	0	0.057754	0	38.1957	50.9689	8.06529	1.38454	31.4442	64.5561	11.7927	13.6817	28.7922	0.065351	0	23.7932	0	0.077662	0	0	0.568762	29.2418	3.55555	0	6.11425	0	0.196887	30.4535	87.9658	0.285988	0	115.706	0	15.37	0.366004	0.092923
NOCLEBFK_01141	175.475	0	0	0	0.283286	4.98223	48.3816	20.5797	117.986	0	0	0	0	0	0	0.096663	0	73.0614	46.3457	0	57.5671	13.0399	23.0039	82.4523	45.1282	0	19.032	45.3887	97.005	0.250517	0	0	0	0	0.17765	55.0465	0	20.467	0.120933	0	0	0	0.319108	0	0	0.120346	0	0.087512	0
NOCLEBFK_01142	0.384446	331.806	374.281	0	0.520931	0	0	0	61.8945	2.21063	0	0	0	0	0	0	0.310043	0	0	0	0	0	0	0.439056	0	0	0	0	0	0	0	0	0	0	0	0	0	0	0.333574	0	0	0	0.440104	0	0	0	0	0	0
NOCLEBFK_01143	52.4853	0	38.2496	0	0	1.32779	0.228212	0	0	22.747	0	0	0.141431	0	0	0	0	0.10431	16.2033	0	16.9672	0	0	0	3.39374	4.75543	0.087451	0	0	0	0	0	0	0	0.355085	0	0.109832	0	0	0	0	0	0	0	0	0	0	0	0
NOCLEBFK_01144	187.755	171.123	211.642	117.547	47.5463	608.88	96.4825	98.9556	184.523	0.165384	0.152774	148.144	0.438048	0.206218	0.100851	0.159579	0.092781	216.461	88.96	76.5212	260.342	124.052	60.9926	79.2272	82.2461	52.8032	9.84115	24.9095	0.084286	0.310179	0	0.273766	0.613874	47.5391	1.24643	148.797	0.113393	139.745	20.8629	0.544016	25.4676	0.392979	0.526807	0.101772	0.181961	0.298013	0	0.072236	0
NOCLEBFK_01145	253.297	163.897	38.2562	50.854	49.8484	67.2856	75.9167	75.6763	89.4411	35.9452	28.5559	53.4235	43.0813	50.8149	56.0589	17.732	28.7357	57.7549	42.489	18.3821	94.2518	27.812	33.6881	53.6148	49.8496	20.1981	28.895	25.7492	44.79	25.955	34.3382	60.394	24.5163	41.4148	45.9341	41.7598	35.3661	28.3871	40.4086	81.2152	38.7264	46.0156	48.6619	12.8294	71.3843	25.3148	33.5202	20.3708	15.695
NOCLEBFK_01148	0.390962	0	0	132.09	0	0	0	0	0	0	0	0.375419	0	0	0	0	0	415.742	139.699	0	370.174	30.7887	3.91078	45.5428	48.5674	0	123.955	243.283	0	0	0	0	0.521533	0	116.109	0	0.385344	0	1.35691	182.1	150.902	129.54	0	0	0	0	0	0	0.436267
NOCLEBFK_01149	273.984	0	0	0	152.223	0	1.80305	0	0	0	0	0	0.446965	0	0	0	0	101.533	6.35132	0	27.7352	25.6	0	0	2.25795	0	0	0	1.54803	0	0	0	0	0	8.97741	0.939777	0	0	0	0.416318	0	0	0	0	0	0	0	0	0
NOCLEBFK_01150	0	0	0	0	0	0	0	0	0	0	0	0	0	0	0	0	0	0	0	0	0	0	0	0	0	0	0	0	0	0	0	0	0	0	0	0	0	0	0	0	0	0	0	0	0	0	0	0	0
NOCLEBFK_01155	32.9952	0.304626	244.381	26.9736	0.101152	0	0	0.929604	0.12923	0	0	0	0	0	0	0	0	0	15.3143	52.6138	2.35166	0.100491	7.84054	43.9909	25.2475	0.130028	21.2072	0	0	0	0	0	0	0	0.095149	77.8241	0.294308	0	0	0	0	0	0	0.132073	0	0	0	0	0
NOCLEBFK_01156	103.299	0	0	0	0	0	0	0	0	0	0	0	0	0	0	0	0	0	0	0	0	0	0	0	0	0	0	8.82706	0	0	0	0	0	0	0	0	0	0	0	0	0	0	0	0	0	0	0	0	0
NOCLEBFK_01157	130.614	0	63.2491	0	0.395644	211.842	14.75	59.3887	47.177	0	0	0	0	0	0	0	0	0	4.16889	0.227145	188.905	0	0.243392	29.5668	0.312016	0	0	8.909	0	0.174939	0	0	0	0	4.21787	88.9999	0	0.310704	0.168898	0	0	0	0	0	158.709	151.102	332.72	0.122222	0.217213
NOCLEBFK_01158	3.15983	0	0	80.6326	0	55.8491	0	65.2069	0	0	0	0	105.876	0	0	0.438296	0	0	0	0	241.668	0	41.8802	0	0	0	1.48786	0	0.462995	0	0	0	0	0	0	0	0	0	0	0	0	0	0	0	0	0	0	0	0
NOCLEBFK_01159	0.892464	0.21011	0	0.490515	0.604652	0.204504	0.421785	0.122129	0	0.049344	0	0	1.30697	0.246111	0.782347	0	0.221459	1.09247	1.70243	0	0.180224	0.184832	0.858393	0.078403	1.81568	0.298947	0.215504	0.241693	1.35798	0.246789	1.2805	1.06186	0.091579	0.281334	1.48755	0	0.135329	0	0	1.46083	0.723676	3.63476	2.3577	0	0.651485	0.296387	0.600528	0.08621	0.076606
NOCLEBFK_01160	0	0	0	0.266042	0	0.258807	0	0	0.451208	0	0	0	0	0	0	0	0	0	0	0	0	0	0	0.446498	0	0	0	0	0	0.11712	0	0	0	0	0	0	0	0.832055	0.678456	0	0	0.222577	0	0	0	0	0	0.24548	0
NOCLEBFK_01161	152.204	0	0.221864	0	0.123055	0.18035	0	0	46.5349	216.058	0.24119	0	0.230521	0	0	0	0	0.170018	21.0872	0.211942	43.5489	24.6948	19.985	0	70.8908	90.4808	0	0	40.4519	0	0.169389	0	0	68.3531	43.407	0.161563	0	2.17432	24.8999	0	44.3305	0.465309	0.207923	0	59.6083	0	0	0	0.202675
NOCLEBFK_01162	130.285	143.373	131.839	28.3409	10.6116	23.6113	89.2309	55.727	187.705	0	0	7.10979	0	0	0.249638	0.098752	0	81.704	13.6423	342.44	11.3385	72.3584	26.1714	38.2141	138.31	58.4077	68.8335	48.1238	0.208633	0	0.132792	0.169414	0.569823	21.1035	39.5643	1.64654	0.280683	22.9547	19.2732	0	27.4791	0	0	0.125959	49.6576	0	0	0.178806	0
NOCLEBFK_01163	55.7894	0	0	0	0	0	0	0	0	0	0	0	0	0	0	0	0	0	0	0	0	0	0	0	0	0	0	0	0	0	0	0	0	0	0	0	0	0	0	0	0	0	0	0	0	0	0	0	0
NOCLEBFK_01164	58.0674	0	0	0	0	0	0	0	0	1.61192	0	0	0	0	0	0	0	0	0	0	0	0	0	0	0	0	0	0	0	0	0	0	0	0	0	0	0	0	0	0	0	0	0.091688	0	0	0	0	0	0
NOCLEBFK_01165	0	0	0	0	0	0	0	0	0	0	0	0	0	0	0	0	0	0	0	0	0	0	0	0	0	0	0	0	0	0	0	0	0	0	0	0	0	0	0	0	0	0	0	0	0	0	0	0	0
NOCLEBFK_01166	0	0	0	101.831	0	0	0	0	0	0	0	0	0	0	0	0	6.97596	0	0	0	134.735	0	0	0	0	0	0	0	0	0	0	0	0	0	0	0	0	0	0	0	0	0	0	0	0	0	0	0	0
NOCLEBFK_01167	112.7	2.93137	0	2.76997	0.865214	4.27972	2.28844	10.0814	0	0.344215	0.423961	2.29928	0.405207	0.286136	3.77826	0.442846	0.257475	55.4376	3.41878	0.372549	0.977824	12.4637	6.78635	0.911535	5.24543	0	0.250551	0.842999	0.818651	1.00423	1.04212	0	3.40711	0.545146	5.49361	0	0	0.509598	3.3242	1.88712	0.776647	4.49852	0.548226	4.66005	1.38863	2.75671	2.37385	8.41936	1.06878
NOCLEBFK_01168	12.6787	0.108694	37.7425	68.296	11.4051	24.65	60.9864	0	49.7074	70.3776	66.7802	0.102308	0.135225	0.190978	0.093398	0	0	0.099733	37.71	0.994612	21.164	0	0	34.435	2.90326	44.0757	22.9101	29.2577	6.63483	0	0	0	2.27403	0.14554	23.0183	0.094773	0	19.302	0.832009	0.503812	0.086394	0.454921	14.1484	0.188502	0	3.95584	0	0	1.1889
NOCLEBFK_01169	6.29094	0	0	2.85391	59.4335	83.6358	0	0	0	0	0	0	0	0	0	0	0	0	15.3641	1.63131	3.36418	108.211	0	36.3219	95.7959	0	0	0.30761	71.1819	0	0	0	0	87.1283	0	0	0	0	0	0	0	82.9707	0	0	131.837	0	0	0	0
NOCLEBFK_01170	17.7553	210.862	101.77	65.8323	150.522	231.606	321.822	375.933	161.041	0.109077	0.201521	0	29.854	0.136009	0	0.315746	0	94.7502	43.1064	23.0208	158.825	40.5512	211.192	128.944	80.0289	0.792997	60.0234	52.0913	156.986	0.136383	0.707644	0	0.202437	45.6057	31.7221	262.015	0.149574	32.5795	0.65837	0	64.3574	54.0401	0	0.268491	25.6822	0.131034	1.59298	0	0
NOCLEBFK_01171	141.687	63.6985	0	6.83764	27.7449	17.8215	24.9789	4.49703	159.947	72.8599	0.167842	0	0	0.113279	0.110798	0.087659	0	82.1097	4.27409	0.147489	68.574	57.1694	31.7657	0	8.71165	0.330234	0.099191	0	0.092599	0	0	7.66958	0	0.086327	1.36936	0	0	0.201745	0	33.4697	0.102489	1.29522	0	0.11181	0	0	0.221126	0	0
NOCLEBFK_01172	34.1262	0	0	27.5763	0.856325	66.9875	33.4886	0	0.273507	0.11356	0	0.151711	0.401044	0	0	0.219148	0.127415	0.147892	0.712348	0.368722	153.738	31.3709	0	0	3.29219	62.1941	39.1803	30.8705	0	0.425964	0	0	0	0	230.174	0	0	0	0	0	61.7496	200.219	0	0.978339	0.124942	0	0	0.099201	0
NOCLEBFK_01173	21.9051	131.883	0	51.8323	46.2092	30.4843	215.128	87.5323	0	0	0	0	61.5011	0	0	0	0.267663	0.31068	9.35277	0.38729	0	13.9622	0.207496	0	0.398998	0	0.130232	0	0.121578	0	0	0	0	5.10044	0	143.629	0	0.264881	0	0	0.134563	0	0	0	0	1.57618	67.9366	0	12.2218
NOCLEBFK_01174	59.0618	2.49901	147.118	30.6984	0	0	27.8701	53.0191	111.433	49.2011	0.180715	0.130677	0	0	0	0.094382	0	52.1017	24.5434	79.4002	15.7194	1.64877	51.3881	0	0	0	29.3695	28.1476	0	0	0	0	0.363073	2.88139	39.8952	55.8054	0	1.41192	0.354238	0	0.11035	0	0	0.120386	0	0.117506	0	0	0
NOCLEBFK_01175	123.638	0.156882	0	8.31913	29.4847	6.87132	71.6472	117.361	178.23	56.371	25.7302	0	0	0	0	0.213304	0	46.0635	45.4146	156.117	223.516	45.7497	125.174	62.6972	19.5961	0.133928	33.3082	66.7267	32.1087	72.0031	0	0	0	0	0	0.13679	0	0.122728	0	0	0.24939	0.131321	9.15415	0	0	0	0.269037	0.096555	0
NOCLEBFK_01176	194.626	626.549	320.804	100.065	73.0931	213.536	250.716	638.827	352.316	221.581	0	0	2.13472	0.215347	0	0	0	204.452	127.566	77.6658	319.177	16.4963	156.828	130.619	189.106	28.8783	83.346	19.8793	0.352069	0.21594	0	0.285886	0	1.14878	138.123	123.111	0	151.876	0.625451	0	136.97	109.981	0.275065	0.212556	7.79067	0	0.210185	0.150868	0.536245
NOCLEBFK_01177	160.852	0	0	45.8337	75.014	0	26.1394	0	0.266213	0	0	0	0	0.551289	0	0	0	5.47004	0.346676	0	16.1481	78.0436	0	0	0	0.267857	0	0	117.394	0	0	0	0	0	40.5734	115.177	0	0	0	0	0	0	0	0	0	0	0	0.193111	0
NOCLEBFK_01178	82.8455	0	12.3025	15.2543	0.660335	0.322597	0	0	0	0	0	0.311968	0	0.291174	0	0	0	0	0	200.927	0	0	0.406225	28.5696	4.16607	0	0	0	0.238018	0	0	0	0	0	0	0	0	0.259285	0.281894	0	0.26344	0.832313	0	0	0	0	0.284194	0.20399	0.362532
NOCLEBFK_01179	80.2185	0	0	13.9165	30.3966	0	0	46.817	0	0	0	0	0	0	0	0	0	0	0.178699	0	0	0.853659	27.5535	0	0	0	0.124414	0	0	0	0	0	0	0	0	0	0	0	0	29.2367	1.67117	0	0	0	0	0	0	0	0
NOCLEBFK_01180	40.5975	0	0	0.156965	0	33.2877	39.9964	0	0	0	0	0.147665	0.195175	0	0	0	0.372051	44.0482	10.4003	0	0.269134	19.8732	65.5675	0	15.8988	0.267857	0.120682	5.81998	0.112662	0	0.430248	0	0	0.73522	147.495	129.13	0	0.859097	11.7418	0.363584	211.607	332.241	0	0	85.2489	0.265563	0	0	0
NOCLEBFK_01181	199.123	68.3846	128.923	38.7716	47.5516	53.3783	12.382	0.23382	52.56	0	0.174537	0	0.166816	0	0.115217	0.182311	0.105998	41.7081	64.7425	131.899	142.733	86.6974	32.704	19.5136	59.727	0.91575	3.61015	29.0362	0.192585	0.118121	0.122578	0.156382	0	63.1984	157.475	0	0.259092	121.994	0.114042	1.24302	107.11	158.37	0.601851	0	30.8703	0	0	0.082526	0
NOCLEBFK_01182	24.2059	0	0.347861	68.8901	0	66.1683	56.2796	83.8439	0.246494	0	0	0	107.708	0	0.249638	0	0	0	32.4206	69.784	0	11.309	81.541	21.1397	32.8657	41.9146	0	0	0.6259	0	0	0	0	18.6722	0	0	0.280683	0	0	0	0	0	22.8202	0	26.7993	0	0	0	0
NOCLEBFK_01183	90.7992	107.821	0	22.2605	0	0	24.6936	14.5489	0	0	0	0	0	0.187939	0	0	0.169114	0	21.0369	0.244697	48.6277	0.423434	0	0	18.4869	11.323	57.1045	10.1511	0	0	38.7223	0	0	0.143225	0	0	0	60.4157	0	0	0	0	0.240056	0	0	0	0	0	0
NOCLEBFK_01184	127.636	98.5221	77.3921	13.8129	12.1898	85.3571	9.44798	42.4032	30.4814	14.0375	0	84.169	0	0.137822	0	0	0.124017	108.681	40.3878	106.411	85.7193	0	35.7641	8.6055	26.9909	8.43749	61.1858	0	0	0.138202	0.286832	0	0	0	0.490017	42.8152	0	2.08638	0.533718	15.9977	27.6823	21.9305	0	0	55.4544	0	0.134518	0	0.171598
NOCLEBFK_01185	198.557	46.339	61.9392	4.46001	1.37691	27.7476	3.64184	73.484	50.4866	0	0.134939	0	275.867	0	0	0	0.08195	0	53.0323	26.0867	0	0.889149	2.03292	0.58025	21.1745	0	0.079746	35.596	31.4908	0.091323	0	0	0	0	13.1463	124.195	0.100156	0.081098	0	37.1192	62.5397	26.293	0.116327	0	0.401797	0	0	0	0
NOCLEBFK_01186	76.3964	1.20679	39.014	38.0338	46.6834	115.892	18.0683	22.7974	45.4781	0	0	0	0	0.176695	0	0	0	34.1416	114.448	0	138.967	59.7151	19.8443	29.383	27.9674	10.1305	11.4493	42.8603	0.649973	0	0.091933	0	0	0.067328	38.8244	0	0	0.157344	2.90808	38.9221	0	0	0	0	0	0	0	0.123789	0
NOCLEBFK_01187	113.706	82.5636	82.405	41.5899	38.1762	0	25.4015	0.998427	0.097158	0.08068	0	0	102.004	0	0	0.155696	0	33.3078	54.0258	154.689	0.196448	0.075552	0.14035	0	24.6492	0	18.1464	0.098794	0.082235	0	0.104683	0.133553	0	0	0.143071	33.3487	12.8336	28.1289	0.097394	0	20.206	0.095854	25.1855	0.099296	0	0.096921	0	0.070478	0.125254
NOCLEBFK_01188	27.7267	3.44666	0.284614	28.3012	22.4947	1.04111	16.8203	13.7821	73.3094	0	0	0	0	0	0	0	0.093952	0	29.8089	0	55.8658	28.7778	25.783	54.9485	0.373473	52.0494	13.9881	0	40.6266	0	0	0	0	0.079569	1.11367	51.2962	0	0	0	0	0	0.099485	0.133365	0	1.10555	0	0	0	20.1498
NOCLEBFK_01189	118.794	0	0	0.336353	0.111628	5.39889	0.506142	47.4838	0	0.473706	0	0	0	0	1.2999	0.11427	0.132875	0	45.6869	0	0	0	0.206014	1.6935	0.132049	0	11.2493	0	0	0.148073	0.614639	0	0	0	0	0	8.44455	0	0	1.753	0	0	0	0	0	0.284532	0	0	0
NOCLEBFK_01190	86.0568	175.487	280.804	142.073	15.1604	120.493	190.373	14.643	89.8469	13.8873	162.712	0	292.637	0.088348	0.172826	0	0.079498	72.6201	137.004	23.9259	212.288	123.212	131.884	120.234	58.3839	50.3948	49.8974	22.2978	34.7375	18.9584	0	0	0.131498	52.4484	35.432	147.487	0.097159	2.98953	0	0.233067	4.23643	0.08418	79.8957	0.087202	0.233866	0	0	0.247578	58.2994
NOCLEBFK_01191	223.459	0	0	0	0	0	0	0	460.881	0	0	0	0	0	0	0.333288	0	0	0	0	5.88732	10.3506	0	0	0	0	0	0	0	0	0	0	0	0	0	0	0	0	0	0	0	0	0.550129	0	0	0	0	0.301735	0
NOCLEBFK_01192	80.8526	0	0	0	0	0	0	0.423045	0	0	0	0	0	0.426254	0	0	0	0	0	0	216.001	0	0	147.74	0	0.414212	0	0	0	0	0	0	0	0	0	0	0	0	0	0	0	0	0	0	0	0	0	0	0
NOCLEBFK_01193	104.243	0	44.7171	10.5569	9.68102	14.9993	17.1401	16.2205	0	0	0	0	0.172721	0	0	0.094382	0	0.509552	0	6.98722	142.189	23.0828	0	8.39258	42.1	1.30373	0	0	48.9531	0.122302	0	0.161918	0.363073	0.371792	0	0	0	0.325827	0	0	0.11035	0	0.155789	0	0	0.117506	0	0	0.151857
NOCLEBFK_01194	51.4501	0	0	0	54.3782	0	77.6209	28.5264	22.2669	0	0	0	0	0.153705	0	0	0	3.53182	8.31249	0.600372	69.0345	1.03891	24.6604	0	3.02388	0	0.13459	30.793	0	0	0	0	0	2.69411	48.9652	3.50873	0	0	0.297613	0	105.272	0.146454	1.17797	0	0	14.8083	125.117	0.107683	181.039
NOCLEBFK_01195	219.034	0.204629	85.5103	31.12	14.5408	147.385	46.4183	8.38549	197.75	0	0.266358	0	43.787	0.179768	0.175832	0.139111	0	0	21.7049	0	28.2591	15.7959	12.2892	102.854	64.7846	39.8291	19.8338	0	0	0	0.187064	0	0	187.002	6.39152	0	0	0	0.696155	0	0	0	0	0	0.158622	0	0	0	0
NOCLEBFK_01196	401.362	196.201	212.734	36.7886	64.0745	180.372	109.242	333.925	115.553	0.414493	0.38289	0	0.365953	65.121	0	0.199973	0	167.88	129.353	36.674	0.252314	203.778	87.6076	48.0766	27.2682	102.204	144.366	7.61334	0.633724	0	0	0.686126	0	77.395	21.6832	112.595	0	125.873	0.250181	0	149.4	33.4867	50.832	0.255067	0	0	136.956	183.757	0.321747
NOCLEBFK_01197	364.537	10.5055	185.161	64.3275	0	52.3529	1.68714	250.609	458.148	36.7122	65.6382	0	0	0	0.361083	0.285675	0	114.902	113.289	9.6131	206.897	129.475	76.2253	127.953	7.59285	9.68589	54.6302	0	209.129	0	0	0	0	171.051	216.57	0.366401	0	1.31494	0.357401	15.5822	116.568	0	0.943079	0	34.2029	0	0	0.25863	0
NOCLEBFK_01198	208.633	37.7756	262.192	61.8978	51.7367	70.8831	143.274	64.7387	76.7114	3636.02	60.2144	71.7535	23.7291	0.054404	0.159637	0.252597	0.244771	40.3434	62.4701	4.10834	69.4792	56.9147	28.0071	31.4734	38.482	69.0436	15.1964	3.90017	49.7195	0.32732	76.5954	0.361119	0.404874	71.3108	26.9251	82.6138	0.777787	31.7801	20.3831	0	35.7842	22.1863	0.6949	0.375888	14.7853	25.9448	24.7974	0.419253	134.795
NOCLEBFK_01199	130.302	0.442615	274.878	24.209	51.4399	36.0439	120.247	224.858	198.032	1.87106	0	0.13887	0.3671	1.03691	1.26775	0.702098	0.116631	57.3988	60.1521	1.51881	2.40449	20.7337	39.9629	98.4366	47.4054	105.673	34.6157	29.276	26.276	4.54896	0	0.344139	0.192918	4.93878	150.415	112.562	0.285082	41.2043	0.125482	0.341929	0.117268	4.69296	27.3168	3.0704	29.1636	3.37157	7.84338	9.71607	0.322756
NOCLEBFK_01200	148.252	9.12984	63.5566	5.73571	13.1604	61.308	72.032	61.9541	112.77	192.025	0.092124	0	0	0	0	0	0	1.55854	28.8549	0.080952	10.2595	2.5215	22.8134	5.70443	0.166799	3.80639	0.054443	15.387	0	0.062347	0.064699	0.082542	0.092543	0.18953	0	0.246839	0	8.13881	0.060194	0	0.112507	17.0618	0.238252	0	0.054862	0.059901	0	0	0
NOCLEBFK_01201	68.0767	9.84448	126.432	13.8975	9.49318	0.393772	18.8147	109.702	75.4016	0	0	0	0	0.118472	0.115878	0.091678	0	32.4193	40.6773	96.8692	7.5188	60.6801	0.165284	37.1373	12.2893	0.345374	0	27.6902	0	0	0.24656	0	0	160.436	101.261	0.117584	0.130288	27.3237	13.8782	62.1948	0	0	0	0	75.4751	0	0	0.082999	0.295011
NOCLEBFK_01202	170.856	137.647	0	91.1027	103.977	28.314	36.0827	75.0597	146.283	170.796	0.307851	65.6701	1.7654	0	0	0.482346	0.18696	208.544	65.851	86.0252	171.015	0	206.677	49.2449	6.50294	53.706	0.363865	93.0434	3.73653	0.208344	0.864819	0	0.309251	0.158339	3.10262	270.349	1.14248	46.6244	0.20115	5.20711	0.187982	0.197971	254.774	0.410158	0	1.00086	0.811165	0	0
NOCLEBFK_01203	103.783	137.492	63.5149	99.9493	45.9617	95.9143	196.106	182.642	91.04	285.191	12.9754	2.4797	5.66922	2.31441	1.89664	0.193619	6.69805	53.6376	45.7864	218.347	249.916	134.307	43.023	41.3682	77.4158	126.189	25.9622	25.6158	57.6264	5.20609	1.43199	0.996492	1.58275	90.2857	66.4525	57.1785	0.137581	40.996	0.787255	11.5511	0.9055	39.3962	4.39438	3.33401	17.3309	1.80792	8.4252	2.1473	0.467287
NOCLEBFK_01204	124.489	53.5486	120.253	20.5506	14.5439	16.6377	69.4035	85.2334	90.9048	21.5313	0.118039	17.1564	0	0	0.077922	0	0.107529	10.5257	37.3729	48.8546	22.0519	46.1888	30.1757	25.6835	29.3511	42.9655	1.49981	20.2631	0.032561	2.79599	17.9063	0	0.177864	11.8692	52.2307	55.7438	0.043806	25.0422	0.154254	0	0	24.5562	3.51065	0.078633	7.20524	7.17634	17.8451	0	0
NOCLEBFK_01205	1071.63	240.509	475.184	267.771	112.839	263.207	111.694	375.926	1350.24	272.863	842.617	0	0	0.350395	0	0.271149	0.630596	178.96	438.486	170.624	354.778	269.73	276.199	336.213	381.959	50.3934	247.603	0.688211	0	0.35136	0.364617	0	0	38.1851	248.414	37.907	0.385344	26.2097	39.3504	0	135.051	0.667731	0.447563	111.365	0	0.33758	0	0.24548	0.436267
NOCLEBFK_01206	0	0	0.149876	0	0	0	0	0	0	0	0	0	0	0	0	0	0	0	0	0	0	0	0	0	0	0	0	0	0	0	0	0	0	0	0	0	0	0	0	0	0	0	0	0	0	0	0	0	0
NOCLEBFK_01207	0	0	0	0	0	0	0	0	0	0	0	0	0	0	0	0	0	0	0	0	0	0	0	0	0	0	0	0	0	0	0	0	0	0	0	0	0	0	0	0	0	0	0	0	0	0	0	0	0
NOCLEBFK_01208	154.11	0	0.242903	1.01486	35.4323	38.1082	1.22172	56.2468	60.5864	0.142929	0.528123	0.381892	0.504762	2.13862	2.78906	2.62033	1.4433	28.2933	45.2771	0.464081	51.8548	40.8224	2.48638	47.4635	1.11559	76.2006	0.624217	8.40093	68.7627	1.42967	0.185452	1.65617	0.795787	0.814899	3.80185	0.707533	0.195994	3.0153	0	3.52614	4.99855	3.22641	0.45528	0	0.943529	2.7472	1.73946	0	0.887578
NOCLEBFK_01209	130.044	17.7549	90.1825	19.4561	26.6704	0.068576	38.5415	25.4321	149.446	16.5797	0	0.066317	9.29125	0	0	0	0.055696	30.3197	17.3597	17.3266	1.08782	38.6753	1.81342	0	17.6013	27.0664	0.704581	0	0	0	0	0	0	0.660377	32.526	43.6171	0	17.6376	0	0	0.112001	0	0.079061	0	0	0	0	0.086726	0.077065
NOCLEBFK_01210	157.992	0	0	0	0.107041	72.6352	1.29424	77.7142	0.136753	0	0.629407	0	34.6903	0	0	0	0	0	5.34261	0	43.1352	23.6079	0.197548	0	0	0.137598	0	0.278113	0.115749	0	0	0	0	0	142.776	0	0.155721	0	0	0	10.377	14.1664	0	0	2.87367	0	0	0	0
NOCLEBFK_01211	170.578	0	0	0	0.131327	1.73227	0.198487	0.172418	0	0	0	0	0	0	0	0	0	0	21.4123	17.1905	86.8467	0	0.24237	0	0	0	0	0	1.70413	0	0	0	0	0	0	0	0	0	0	0	0	0	0.221901	0	0	0	0	0	0
NOCLEBFK_01212	50.8138	0	1.1434	0	0	0	0	2.02203	0	0	0	0	0	0	0	0	0	48.4418	0	0.312077	1.5212	3.24019	17.0544	0	43.2969	0.232919	0	0	0	0	0	0	0	0	2.72705	0.356843	0	0.533601	0	0	0.10843	0	0	0	0	0	0	0	0.298432
NOCLEBFK_01213	0	0	0	0	0	0	0	0	0	0	0	0	0	0	0	0.1092	0	0	0	0	0	0	0	0	0	0	0	0	0	0	0	0	0	0	0	0	0	0	0	0	0	0	0	0	0	0	0	0	0
NOCLEBFK_01214	216.999	454.959	62.615	83.2162	43.659	1324.09	392.916	184.768	68.8773	0.175447	549.092	0.468778	0.929404	447.157	0.213975	0.169289	0.196853	20.7925	170.587	383.1	497.044	30.0661	68.061	193.463	275.054	50.17	40.0358	10.0974	122.676	0.219368	0	0	0.651226	48.0143	242.986	195.414	0.481171	88.2474	6.77738	209.782	4.94821	4.79424	0.279431	0.21593	103.079	40.6775	181.92	0.459787	419.735
NOCLEBFK_01215	302.072	11.0917	0.717879	6.59852	85.008	0	30.0891	180.085	0	0.633619	0	1.69297	0	0	0	0	0	0	0.662438	0	0	5.93347	69.4412	0	97.7335	228.531	225.068	28.7076	80.9444	0	0.274043	0	0	0	12.3597	0	0	105.296	0.254961	0.347373	84.8243	47.9278	0	0	3.71803	0	8.7394	0	0
NOCLEBFK_01216	88.3575	0.132951	17.3518	0	15.6279	0.647017	0.400338	30.9504	0.338406	0	0	0	0	0.467194	0	0	0	0.24398	0	0	0	38.5078	0.814746	0	0	0	4.29546	0	0	1.05408	0	0	0	0	21.1787	3.82548	0.128448	34.6343	0	0	0	0.111289	0	0	0	1.12527	0	0	1.59965
NOCLEBFK_01217	126.395	83.3277	94.6923	7.14061	22.1609	0.09387	42.787	55.2464	16.4474	0.203849	0	0	0	0	0	0	0	3.89369	27.8122	26.3651	29.1195	0.063631	1.77307	9.39292	44.4747	36.4735	3.78368	48.3426	22.7864	0	0.088165	0	0.252217	0.258274	0.120496	48.1847	0	0	0	0.111757	0	0	0	0	0	0	0.661565	0.118716	0
NOCLEBFK_01218	26.5268	89.4229	185.497	94.9637	0.260465	239.733	0	219.539	0.332766	0	0	665.969	0	0	0	0	0.310043	223.48	91.0025	98.2459	0.672836	146.202	61.0489	6.58584	131.257	0.669642	85.6842	76.8101	2.5349	0	0	0	0	175.14	150.68	127.898	0	2.76138	40.3625	0	0	5.25282	0	0	0.304026	0.663907	0.336296	0.241388	0
NOCLEBFK_01219	68.2898	17.6493	86.0132	197.342	85.8508	232.962	0.310789	46.5697	403.917	0.327231	0.201521	0	0.770427	0	0.532123	0	0.122385	35.3715	27.8823	7.4375	268.648	55.4643	94.4955	67.2449	137.192	221.775	2.62007	5.34269	0.778257	0.136383	3.25516	0.18056	0.607311	0	92.0716	168.872	0	178.037	30.68	0.3588	73.3403	202.294	0	0.536983	8.40072	0.262069	0	0.19057	0.16934
NOCLEBFK_01220	33.4774	0.208251	6.48315	4.16721	1.9362	7.70237	1.67221	0.181572	3.5338	0.293446	0.813217	0.980077	0.518163	10.4281	1.6105	1.13259	0.493874	2.86623	2.07085	0	0.893145	1.23658	3.82858	2.09814	0.327202	2.31115	0.160197	4.49165	0.598205	3.11871	1.71338	0	1.08922	1.67307	4.94353	8.35265	0	0.651654	1.06271	8.44609	2.15182	2.96343	3.50525	0	0.16143	3.34891	2.32133	1.15354	1.36671
NOCLEBFK_01221	56.2421	40.8114	0.656801	11.0863	21.7844	3.63053	39.752	81.9751	0	0.077295	0.142803	0	0	0.096379	0	0	0	23.8572	33.213	106.035	49.8746	0.144764	14.2529	31.6857	42.7483	15.6406	0.168786	13.0616	0.078785	0	0	0	0	0.440691	3.83789	0.191314	0	21.8851	0	0	0.174399	11.9382	6.77082	0	23.9819	0.092854	51.3615	0.067521	0
NOCLEBFK_01222	103.083	0.22519	0	49.7931	19.2919	0.876723	59.4454	0.392683	43.7532	0	0.293121	0.211959	0	0	0	0	0	29.7539	11.9429	0	0	124.95	20.7	49.6616	4.06889	0	63.0549	89.1744	0	0	0	0	0	0	0	0	0	0.176165	0	0	0.178988	65.5974	0	0	1.22192	0	0.193088	0	0
NOCLEBFK_01223	101.436	65.2801	87.4776	25.2194	34.0676	79.255	0	38.7175	158.725	0	183.787	0	0	0	0	0	0	1.71654	15.3393	0.112622	86.5678	1.10435	0	2.31469	20.8075	0.252166	0	0.424733	0.141417	0	0	0	0	0.065919	1.10715	0	0	0.077026	0.167485	0	0	0.164837	0	0	0	0	0	0	0
NOCLEBFK_01224	89.1709	0	0	28.4433	3.77588	0	0	112.09	0.535999	0	0	0	0.196485	0	0	0.107368	0	0	3.14102	0	0	0	0	0	0	0	0.121492	39.5144	11.0016	0	0	0	0	0	0	0	0	70.7952	0	1.83012	0	0	48.0274	0	0.122427	0	0.135421	0	0
NOCLEBFK_01225	67.867	0	1.30297	0	0	0	0	0	0	0	0	0	0	0	0	0	0	0	0	0	0	0	39.6786	0	0	0	0	0	0.097684	0	0	0	0	0.273203	0	0	0	0	0	0	0	0	0	0	0	0	0	0	0
NOCLEBFK_01226	110.376	149.331	0.263334	0	0	0	66.4449	147.459	238.472	402.407	0	0	0	0	0	0	0	0	0	0.251558	0.377291	0.145102	0	0	49.0681	0.3755	0	58.8196	0	0	0.20105	0.256496	0	0	0	71.1434	0	73.4648	0	0	0	0	0	0	0	0	0	0.406074	0
NOCLEBFK_01227	74.2032	57.2038	174.392	87.3931	76.8885	63.2788	68.5563	127.825	109.74	112.317	0.356695	35.0785	49.1772	0.060184	0.235466	0.093146	0.108312	152.057	239.116	98.9688	263.434	49.2219	46.0968	173.628	72.8713	3.2751	74.7807	20.0954	21.4501	0.1207	0.125254	0.239695	0.179158	32.0598	15.7918	153.754	0.132375	65.5443	40.6698	22.1485	0.598971	5.4478	78.2577	0.178213	68.5586	0.057983	0.058742	0.168656	0.149868
NOCLEBFK_01228	88.9267	48.8147	55.1404	76.1172	53.8873	145.494	233.149	166.149	99.8689	41.4655	304.753	156.825	0.916672	0.809132	0.870557	0.250455	1.16494	118.821	77.0353	35.3973	100.807	47.0943	58.4742	48.5625	67.7251	30.1142	14.5952	36.6314	16.3371	2.35295	11.2824	0.966753	0.843026	39.4022	29.2859	33.1668	0.266951	68.233	5.24841	22.7329	62.3719	1.38773	38.55	0.559051	72.7521	1.48112	4.89636	0.453489	2.21634
NOCLEBFK_01229	177.021	8.23474	41.6394	44.9346	44.5491	24.6615	23.7789	61.3597	76.1555	83.8581	80.144	0.119245	0	0	0.05443	0.086125	0	38.186	30.6549	55.3549	30.4814	40.7059	14.6733	49.2121	18.7606	0	29.3827	21.3679	0	0.055802	0	0.073876	0.082828	9.83874	34.3869	8.6161	14.1369	4.65805	0.107749	4.33071	0	0	0.42648	0	0.098205	0.053613	0.054314	13.4892	0
NOCLEBFK_01230	117.431	0	0	120.476	0.40592	2.37968	247.243	1.06585	0	0	0	0	0	0.53697	0	0	0	4.4867	105.353	41.9481	3.14573	3.62943	12.7354	15.0533	0	0	7.99323	0.527331	0.877886	0	71.5217	0	0	0.409213	1.90916	0	0	3.82529	0	0	1.9433	1.53492	2.7435	0	48.8021	1.55199	2.09639	0	0
NOCLEBFK_01231	2.02614	204.318	144.501	31.8172	60.5054	229.973	76.9244	142.376	41.5508	120.875	0.206967	0	0	0	0.409878	0.108093	0.377079	2.91787	53.5825	10.0028	8.72868	106.478	26.3086	68.1723	123.912	56.1956	43.4211	87.1076	0.114184	0.560277	0.145354	0	0.415817	35.5545	103.301	87.4807	0.307234	80.3537	14.0642	65.4083	24.5177	215.215	53.1693	0.551496	100.698	351.916	547.798	9.49243	718.974
NOCLEBFK_01232	132.339	906.94	381.174	1307.85	1245.29	798.812	1476.39	612.336	608.501	34.8537	2.08679	83.8564	41.3144	3.92341	4.62468	0.778482	0.724188	933.563	787.866	619.411	521.964	414.327	814.172	685.312	634.943	357.99	347.688	452.28	551.139	1.91667	79.0357	1.60263	1.79681	1166.46	1792.6	435.131	1.99141	1143.7	534.595	1639.71	2389.59	1650.13	1403.71	9.13524	1319.34	358.898	1131.03	192.688	107.218
NOCLEBFK_01233	249.717	112.77	0.316593	114.549	104.128	128.548	214.968	24.8979	69.6566	0	0	69.5601	0.164473	0.116142	0	0.449376	0.418035	153.814	65.2939	45.6676	113.513	15.962	5.99525	44.6949	54.6299	43.6772	56.8494	27.4879	0.569639	0.349386	7.00965	0	0.172868	215.167	147.005	0.115272	0	77.0498	141.113	201.759	220.983	17.0422	0	0.114637	37.6104	0.335683	0.340074	0.081367	30.8009
NOCLEBFK_01234	772.792	260.027	137.944	224.639	131.244	111.397	131.786	309.774	169.022	207.047	0.393338	0.071107	33.9285	0.199101	0	0.102715	0.179158	88.4485	180.711	159.599	110.937	89.3176	46.2953	134.127	116.856	13.0274	39.982	48.2952	94.9399	9.31697	36.464	0.352424	0.197563	131.348	142.05	245.629	0.072987	101.531	0.192755	8.66649	56.443	134.187	157.759	6.68169	27.172	0.319698	0.259104	104.661	0.165263
NOCLEBFK_01235	22.6282	0	0.107136	0	0	0	0	0	0	0	0	0	0	0.078606	0	0	0	0	0.790896	0	0	0	0	0	0.070293	0	0	0	0	0	0.081796	0	0	3.59423	0	0	0	0	0	0	0	0.074898	0	0	0	0	0	0	0
NOCLEBFK_01236	64.9077	0	0	0	0	0	0	0	0	0	0	0	0	0	0	0	0	0	0	0	0	0	0	0	0	0	0	0	0	0	0	0	0	0.064436	0	0	0	0	0	0	0	0	0	0	0	0	0	0	0
NOCLEBFK_01237	23.5639	0	40.6862	19.1808	2.15558	0.098726	41.1313	2.83003	24.7853	0.071464	126.222	0	0	0	0	0	0	0.55842	3.81045	0	6.35134	22.8873	0.124319	0	0	2.16479	3.51122	33.0786	0	0	0	0	0	11.8839	0.063364	0	0	0	0	0	0	0	0	0	0	0	0	0	0
NOCLEBFK_01238	0	0	0	0	0	171.94	0	132.1	0	0	0	0	0	0	0	0	0	0	0	0	0	0	0	0	0	0	0	0	0	0	0	0	0	0.431636	0	0	0	0	0	0	0	0	0	0	0	0	0	0	0
NOCLEBFK_01239	48.6965	5.09868	0	6.14779	0.694574	0.127247	0	0.79791	0	0.092109	1.36139	0.123054	0.487937	0.229704	0	0.088877	0.103348	1.07961	9.67804	0.299074	13.2324	4.31275	11.5368	3.6588	0.20541	0.334821	0.502842	0	0.093885	0.921345	0.119513	0	2.39326	10.7657	0	78.4261	2.27353	3.17048	0	0	2.28607	0	0.146701	0.113363	0.608052	6.97103	0	0.080463	0
NOCLEBFK_01240	0	0	0	0	0.316996	0	0	0	0	0	0	0	0	0	0	0	0	0	0	0	0	0	0.117006	0	0	0	0	0.41181	0.205671	0	0	0	0	0	0.059637	0	0	0	0	0	0	0	0	0	0	0	0	0	0
NOCLEBFK_01241	129.479	0.119758	0	0.11982	0	0	0	0	0	0	0	0	0	0	0	0	0	0	0	0	0	0	0	0	0	0	0	0	0	0	0	0	0	0	0	0	0	0	0	0	0	0	0	0	0	0	0	0	0
NOCLEBFK_01242	19.6123	0	0	1.36491	0	0	0	0	0	0	0	0	0	0	0	0	0	0	0	0	0	0	0	0	0	0	0	0	0	0	0	0	0	0	0	0	0	0	0	0	0	0	0	0	0	0	0	0	0
NOCLEBFK_01243	38.4265	0	0	0	0	0	0	0	0	0	0	0	0	0	0	0	0	60.3567	0	0	0	0	0	0	0	0	0	0	0.397631	0	0	0.129153	0	0	0	0	0	0	0	0	0	0	0	0	0	0	0	0	0
NOCLEBFK_01244	0	0	0	0	0	0	0	0	0	0	0	0	0	0	0	0	0	0	0	0	0	0	0	0.140874	0	0	0	0	0	0	0	0	0	0	0	0	0.243159	0	0	0	0	0	0	0	0	0.106509	0	0	0.137646
NOCLEBFK_01245	66.6991	0	0	11.7724	0	1.51776	131.759	33.7429	0	0	0	0	0	0	0	0	0	0	8.30143	0	0	12.4394	0	0	0	0	0	0.122303	0	0	0	0	0.370728	47.8336	0.97413	0	0	0.332697	0	0	0	0	0	0	0	0	0	0	0
NOCLEBFK_01246	192.599	86.3861	172.682	24.9368	40.0943	40.5096	48.5757	31.9633	115.587	116.015	0.157487	0	58.5524	0	0.103962	0	0.095643	94.029	54.274	180.736	97.345	1.43685	62.7258	52.9576	15.683	33.878	0.186142	63.7772	0.434429	0	3.3181	0	9.96677	9.63913	19.8022	212.886	0.116891	16.6582	20.5804	0	38.9471	0	14.6626	0.209824	43.142	28.263	0.414966	0.223393	124.398
NOCLEBFK_01247	11.8538	0	0	0.32701	0	0	0	0	0	0	0	0	0	0	0	0	0	0	0	0	0	0	0	0	0	0	0	0	0	0	0	0	0	0	0	186.091	0	0	0	0	0	0	0	0	0	0	0	0	0
NOCLEBFK_01248	68.7539	0	0	9.66093	11.0505	0	0	11.437	0.051525	0	0	0	0	0	0	0	0	0	0	0.625162	1.19808	29.1687	18.1612	2.51537	0	7.10252	0.327009	0	0	0	0	0.070826	0	0.162629	0	41.1958	0	20.3808	0.05165	0	10.0882	1.32168	23.9871	0	0	0	0	0.037376	0
NOCLEBFK_01249	113.656	74.1911	151.847	62.2437	40.8978	87.1478	77.3303	85.9256	136.543	46.8653	36.5346	24.3244	66.111	0.952226	5.63728	0.562347	5.65969	45.0428	54.113	77.4222	93.0716	78.1001	19.193	31.8994	57.7016	46.6558	18.2559	36.2979	22.43	4.47271	2.76401	6.15435	1.64109	34.1066	52.904	166.311	17.1411	42.04	0.873358	32.0615	12.4695	12.3441	25.638	0.59361	5.81519	139.107	495.883	0.210666	120.992
NOCLEBFK_01250	37.1004	0	0	0	5.02717	0	0	0	0	0	0	1.23915	0	0	0.141403	0.111873	0	0	0	0	0	0	28.2369	0	0	0	0	0	5.19979	0	0	0	0	31.8399	0.102801	16.2139	0	31.4115	0	0	0	0	0	0	0	0	0	0	0
NOCLEBFK_01251	132.326	55.4392	71.9961	10.725	0.111231	56.2421	73.6337	0.8762	126.617	230.582	0.436031	0	0.416743	0	0	0	0.264805	0.307363	3.70117	93.49	27.4402	45.4174	43.7249	43.3119	4.07897	0.142984	93.5393	2.7455	30.6713	0	0	0	0.219007	0	10.7769	65.1333	0.161817	0	0	0	0	0	0	0.145234	0	0	0.143614	0	0.183201
NOCLEBFK_01252	63.9457	0	0	0	0	0	0	44.521	14.9552	0	0	0	0	0	0	0	0	0	0	0	0	0	0	0	0	0	0	0	0	0	0	0	0	0	0.45407	0	0	0	0	0	0	0	0	0	0	0	0	0	0
NOCLEBFK_01253	211.096	365.547	172.607	106.143	107.975	239.722	161.871	350.57	147.255	130.396	48.8385	0.206524	39.1714	0.096379	0.094269	0	0.086725	100.462	73.699	147.822	216.813	124.859	110.662	138.656	81.015	53.1967	1.94104	5.5843	108.486	0.096645	0	0.255898	0.143452	112.89	115.479	57.5856	0	74.4093	22.8603	59.4956	37.2341	8.54043	13.6648	0.09513	58.424	0	0.282206	0.067521	0.119999
NOCLEBFK_01254	0	0	0	0	0	0	0	0	0	0	0	0	0	0	0	0	0	0	0	0	0	0	0	0	0	0	0	0	0	0	0	0	0	0	0	0	0	0	0	0	0	0	0	0	0	0	0	0	0
NOCLEBFK_01255	0.411907	0	0	0	0	0	0	0	0	0	0	0	0	0	0	0	0	0	0	0	0	0	0	0	0	0	0	0	0	0	0	0	0	0	0	0	0	0	0	0	0	0	0	0	0	0	0	0	0
NOCLEBFK_01256	36.862	0	0	0	0	0	0	0	0	0	0	0	0	0	0.065545	0	0	0	0	0	0	0	0	0	0	0	0	0	0	0	0	0	0	0	0	0	0	0	0	0	0	0	0	0	0	0	0	0	0
NOCLEBFK_01257	0	0	0	0	0	0	0	0	0	0	0	0	0	0	0	0	0	0	0	0	0	0	0	0	0	0	0	0	0	0	0	0	0	0	0	0	0	0	0	0	0	0	0	0	0	0	0	0	0
NOCLEBFK_01258	451.084	1.30735	0.521792	2.61608	0.578812	0.424156	6.5611	7.59914	5.91584	5.8336	0	1.64072	3.25291	10.3367	27.3353	0.592511	0	4.79828	1.44448	0	4.11178	1.15007	29.3761	1.95136	0.684701	0	0	0.751935	5.32015	4.60672	29.0815	8.64011	0.569823	2.33403	26.6787	26.978	0	2.72729	0	3.02987	0	0.364779	0	0	1.68903	11.434	13.0782	0	0
NOCLEBFK_01259	0	0	0	0	0	0	0	0	0	0	0	0	0	0	0	0	0	0	0	0	0	0	0	0	0	0	0	0	0	0	0	0	0	0	0	0	0	0	0	0	0	0	0	0	0	0	0	0	0
NOCLEBFK_01260	44.9944	0	0	0	0	0	0	0	0	0	0	0	0	0	0	0	0	0	0	0	0	0	0	0	12.5072	0	0	0	0	0	0	0	0	0	0	0	0	1.54547	0	0	0.092367	0	0	0	0	0	0	0	0
NOCLEBFK_01261	13.7838	73.7538	0	0	0	0	0	0	0	0	0	0	0	0	0	0	0	12.376	0	0	0	0	0	0	0	0	0	0	0	0	0	0	0	0	0	0	0	0	0	0	91.9245	0	0	0	0	0	0	0	0
NOCLEBFK_01262	172.483	1.72891	6.90043	1.72982	110.99	91.0567	210.362	50.5824	0	26.5275	0	0	178.286	0	0	0	0	64.1598	26.5313	0.219728	85.1893	92.5218	46.8535	0.645144	13.5822	8.69168	1.32997	0.165733	17.1062	0.169227	0	0	0	0.38583	4.20014	137.181	0	0.150279	0.49015	12.0205	0	5.14562	0.215561	0	71.775	0.812948	0	0	5.46313
NOCLEBFK_01263	0	0	0	0	0	0	0	0	0	0	0	0	0	0	0	0	0	0	0.194035	0	0	0	0	0	0	0	0	0	0	0	0	0	0	0	0	0	0	0	0	0	0	0	0	0	0	0	0	0	0
NOCLEBFK_01264	74.4089	100.202	16.5627	73.0814	64.7523	3.44797	155.435	21.3266	6.29751	0	0.658735	5.87484	1.25919	0.74098	4.78338	0.229359	0.533407	6.65568	66.1667	5.20968	103.602	105.064	1.86077	3.39914	71.6948	33.1221	23.7471	4.80268	1.57485	2.52627	4.78053	2.5576	2.8675	52.2898	17.9146	2.20629	2.93359	2.11145	40.4593	144.261	26.548	62.5538	0.189292	0.146275	103.565	0.856654	2.60358	0.830584	0.369029
NOCLEBFK_01265	65.3206	203.803	103.229	3.88812	68.8202	81.8114	71.9433	181.083	3.29713	32.3482	98.5443	0.270945	0	0	0	0	0	159.796	67.904	79.8446	48.5183	25.7341	29.1066	32.0632	19.2219	10.1982	7.30735	64.9423	48.579	0	0.263148	0	0.376397	36.4237	0.179823	58.9827	0	2.47708	0.122412	29.1868	0.114399	0	0	4.49292	0.223138	0	0	0.088583	0
NOCLEBFK_01266	49.8156	14.3625	0	63.8913	47.5441	0.645194	17.0773	63.1906	88.4877	0	0.287617	0.207979	93.1891	0	0	0.150214	0	7.50153	3.1738	160.489	94.5761	78.8687	90.7237	0	25.17	23.9562	0.509924	0	0	0.19465	0	0	0	79.4392	0	122.147	0.426954	0	0.375858	0	115.738	26.2641	0	0.1916	0.171282	182.715	0	0	0
NOCLEBFK_01267	106.345	203.947	266.026	90.9732	52.6067	29.6789	8.76045	74.7499	104.985	96.7539	100.666	0.207979	0	0.097058	0.094933	0.150214	2.00873	8.10977	130.126	17.1862	141.106	109.192	88.6925	142.848	101.374	86.2046	28.3858	76.1572	16.3439	0.19465	0	0	0	119.972	27.7446	150.276	0.106739	55.4005	41.7202	21.3798	8.51789	440.571	29.2576	1.1496	35.6267	39.7409	172.221	42.9739	0.120844
NOCLEBFK_01268	108.456	0.124181	44.0122	137.417	4.2884	29.0082	3.36537	49.0475	0	34.5593	0	0	169.169	0	0.320116	0	0	59.0226	26.4809	0.426122	16.2972	11.2245	33.3319	77.8485	66.4359	32.5457	0.191053	48.3183	0.089178	0	0	0	0.162377	3.15925	33.5125	0	0	1.36005	0.105617	75.4029	0	0.103948	0	0	0.096262	0	0	0	0
NOCLEBFK_01269	161.136	0	9.12197	14.2285	0	0.16478	0	2.65697	69.2345	56.4187	0	0	0	0	0	0	0	0	2.61878	6.39029	3.77563	0	0	0.189521	0.265999	20.6674	0	0	0.121578	0.149139	0	0	0	0.113343	0	0	0	0	0	0	0	4.53481	35.5249	0	0.787406	0	0	0	0.185178
NOCLEBFK_01270	107.484	200.934	19.8825	61.639	60.5541	13.867	199.907	122.678	223.586	49.0815	65.6108	0	0	0.086319	0	0.066797	0.155345	58.6011	128.212	51.8104	98.692	69.0401	45.7618	39.1576	47.4717	25.9189	91.6831	35.264	0	0.086556	0	0	0	77.1619	27.2527	62.3693	0.189857	16.2954	0.250703	0	0.156194	43.1795	0.220511	0.0852	0.076165	0.083162	0	0.120946	0.214946
NOCLEBFK_01271	101.561	80.0359	64.1976	28.6331	21.1235	144.516	95.3883	94.6594	76.4997	22.4099	0.112202	431.149	533.781	465.756	322.531	4.4243	5.79201	125.757	85.3356	133.302	80.3706	68.5301	88.322	42.8924	66.0247	15.2693	24.0369	43.0586	24.8847	10.4411	13.2778	2.16142	0.338137	50.2939	9.66572	111.649	0.541317	37.4928	3.40905	49.1937	17.8478	12.3023	66.4508	14.2015	23.8544	0.109435	0.184778	8.3027	0.18857
NOCLEBFK_01272	48.9085	0.235913	0	22.6596	1.17503	0.114809	13.0235	46.589	4.80384	0	0	0	0.440244	0	0.101357	0	0.279738	30.7378	10.0354	0	0	29.1062	23.9989	19.5429	24.2786	0	33.9362	0	0	0.103911	0	0	0.154238	0.078971	0	0	0	51.2136	0	0	22.9701	0	0	0.102282	0.091436	49.0193	63.4158	0	34.8358
NOCLEBFK_01273	351.325	225.368	14.0884	183.226	137.045	340.336	79.3388	910.669	31.7408	0.21256	0	456.057	0	0.265043	0.518479	0	0.238494	74.4656	230.673	40.7201	543.186	123.61	225.559	96.2546	131.779	0.772664	17.6381	19.5214	168.343	0	1.1032	0	0.394493	131.491	212.592	523.747	0.582957	114.232	145.233	220.947	108.389	13.1321	82.2655	0.261607	116.465	0	0	0.185683	0.989991
NOCLEBFK_01274	0	0	0	0	0.074775	0	0	0	0	0	0	0	0	0	0	0	0.089008	0	0	0	0	0	0	0.126045	0	0	0	0	0	0	0	0	0	0	0	0	0	0	0	0	0	0	0	0	0	0	0	0	0
NOCLEBFK_01275	43.577	286.775	119.804	16.0128	0	80.3096	39.6244	88.5826	175.017	0	0	0	0	0	0.101867	0.080593	0	66.7891	27.2451	0.271201	67.7243	35.6666	11.624	46.0511	31.1996	0	0.091195	40.809	44.6959	0	0.108375	0	0.155015	0	53.3217	132.724	0.114536	67.7941	0.201657	0.137374	0	0	0	0	0	0	0	0	0
NOCLEBFK_01276	202.089	0	0.997407	0.416721	3.87241	0	0.836104	0.72629	0	0	0	4.31234	0	0	0	0	0	1.52866	1.38057	0.476401	271.159	0	0	0	0.327202	0.355562	0	1.43733	0	0	0	0	0	0.836533	0	0	0.402395	136.196	2.12543	0	0	0.348639	0	0	0	0	0	8.45927	0
NOCLEBFK_01277	55.8568	0.105526	13.5198	1.26698	0.07008	0.10271	21.7134	67.3495	0.089534	0.074348	0	0.099326	0	0	0	0	0	0	0	14.8464	0	0.069623	0	3.30769	1.32642	0	47.9752	0	51.3042	3.62547	20.8371	14.0302	52.9859	0	0.065922	79.7736	0	0	1.16676	0	0	0	0	0	0	0	0	0	0.115425
NOCLEBFK_01278	22.5631	0	133.87	0	34.3951	0	6.8075	1.97113	118.052	0	0	0	0	0	0	0	0	1.50863	0	0	0	0.271195	0.50379	0	0	0	0.158099	0	0	0	0.187881	0.239695	0	0	0	0	0	0	0.174799	0	0	0	0	0	0	0	0	0	0
NOCLEBFK_01279	101.221	61.1643	130.184	0.496724	14.9685	0.289929	5.68075	49.8658	0.168489	0.139913	1.55095	0.093459	1.11176	0.087229	0	0.067501	0.392459	1.54881	0.219415	0.795008	0	17.2292	0.486785	7.33613	103.745	22.717	21.0812	46.0869	26.0977	0.874695	0.181539	0.463208	0.259666	42.2785	76.2937	5.10797	1.72673	6.44711	0.253347	5.98303	0.315683	0.166229	0.111419	0	0	3.44559	2.97984	0	0
NOCLEBFK_01280	33.8882	0	1.73931	0	0.024117	0	0.145802	0.221642	0.18487	0	0	0	0	0	0	0	0	0	0	0	0	0	0	0	0	0	0	0	0	0	0	0	0	0	0.022686	0	0	0	0	0	0	0	0	0.062979	0	0.061473	0	0	0
NOCLEBFK_01281	140.198	48.3745	2.09104	8.64908	42.3897	46.2337	49.3433	365.892	96.459	804.377	0.340978	32.2178	0	0	0	0	0.276105	25.1576	9.93719	0.199753	0	26.155	28.3604	32.5504	8.78043	0.074543	3.42567	1.05466	0	0.076921	7.34374	0.101837	0.114176	0	2.45463	11.4964	0.168722	0.068309	16.4126	2.32721	17.1427	0.950186	11.8559	0.227147	0.067687	0	0	0.107483	0.095509
NOCLEBFK_01282	0	0	0	0	0	0	0	0	0	0	0	0	0	0	0	0	0	0	0	0	0	0	0	0	0	0	0	0	0	0	0	0	0	0	0	0	0	0	0	0	0	0	0	0	0	0	0	0	0
NOCLEBFK_01283	115.116	0	109.517	0	0	0	0	0	0	0	0	0	289.724	0.195031	0	0	0	0	0.735869	58.4041	0	0	0.272094	0	14.3012	0	0	29.4957	0.159427	0	0	0	0.290287	0	0	0	0	0	0	0	0	0	0	0	0	0	0.190356	0	0
NOCLEBFK_01284	77.4326	0	25.8868	68.3878	50.1419	90.4845	0.166925	134.851	49.5269	45.5796	0	0.156535	0	0.146101	0	0	0	126.196	39.8739	2.66314	0	0	3.26129	40.027	3.39689	0	1.02345	0	7.88236	0.439511	0.304062	0	0	4.1196	49.0363	9.57045	0	1.95151	0	96.9343	0	0	0.746465	0	0	0	0	0	0
NOCLEBFK_01285	129.386	0	0	0	0	0	0	0	0	13.7211	0	0	0	0	0	0	0	0	0	0	0	0	0	0	0	0	0	0	0	0	0	0	0	0	0	0	0	0	0	0	0	0	0	0	0	0	0	0	0
NOCLEBFK_01286	0	0	0	0	0	0	0	0	0	0	0	0	0	0	0	0	0	0	0	0	0	0	0	0	0	0	0	0	0	0	0	0	0	0	0	0	0	0	0	0	0	0	0	0	0	0	0	0	0
NOCLEBFK_01287	0	0	0	0	0	0	0	0	0	0	0	0	0	0	0	0	0	0	0	0	0	0	0	0	0	0	0	0	0	0	0	0	0	0	0	0	0	0	0	0	0	0	0	0	0	0	0	0	0
NOCLEBFK_01288	62.074	15.6882	0.229079	39.8155	0	31.4703	0	17.0147	33.4389	0	0	379.967	0	0	0	0	0	36.6893	0.211388	0	0.164106	48.9761	0.234488	0	0	27.929	0	0.165059	0	0.168539	0	0	0	0.128087	17.2103	0	0	0	0	0	0	0	0	0	0.148305	0	0.164047	0	0.209266
NOCLEBFK_01289	0	0	0	0	0	0	0	0	0	0	0	0	0	0	0	0	0	0	0	0	0	0	0	0	0	0	0	0	0	0	0	0	0	0	0	0	0	0	0	0	0	0	0	0	0	0	0	0	0
NOCLEBFK_01290	0	0	0	0	0	0	0	0	0	0	0	0	0	0	0	0	0	0	0	0	0	0	0	0	0	0	0	0	0	0	0	0	0	0	0	0	0	0	0	0	0	0	0	0	0	0	0	0	0
NOCLEBFK_01291	0	0	0	0	0	0	0	0	0	0	0	0	0	0	0	0	0	0	0	0	0	0	0	0	0	0	0	0	0	0	0	0	0	0	0	0	0	0	0	0	0	0	0	0	0	0	0	0	0
NOCLEBFK_01292	15.2241	0.078441	0	0.863306	0.052093	0	0	0	0	0	0	0.442995	0	0	0.134804	0.053326	0	0	7.97355	0	0	0	0	0	0	10.4464	0	0	0.281655	0	0	0	0	0	0	0	0	0	0	0	0.062347	0.06566	0	0	0	0	0	0	0
NOCLEBFK_01293	98.0338	8.82463	1.40884	46.7951	12.893	0	90.9368	0	0	0	0	0	0	0	0	0	0	0	0	0	0	1.16444	4.3263	4.93938	0.231087	0	0	0	161.6	0	0	0	0	8.46815	0	0	0	0	0	0	0	0	0	0	0	0	0	0	0
NOCLEBFK_01294	56.98	2.65569	31.9749	23.3233	0.097981	0.143601	47.8322	173.789	27.9148	456.955	0.38409	0	0	0	0	0	0.116631	2.30137	67.9768	66.1526	67.1992	25.5034	24.4117	0	15.1836	0	1.36193	0.127287	0.105952	0.259941	0.134874	0	0.192918	20.8416	8.66362	0	0.285082	0.69251	47.0559	46.3313	0.117268	1.23499	0.165556	0.127933	0.114367	0.124873	0	0.544826	0.322756
NOCLEBFK_01295	1.06299	0	0	0	0	0	0	0	0	0	0	0	0	0	0	0	0	0	0	0	0	0	0	0	0	0	0	0	0	0	0	0	0	0	0	0	0	0	0	0	0	0	0	0	0	0	0	0	0
NOCLEBFK_01296	0	0	0	0	0	0	0	0	0	0	0	0	0	0	0	0.166644	0	0	0	0	0	0	0	0	0	0	0	0	0	0	0	0	0	0	0.15313	0	0	0	0	0	0	0	0	0	0	0.207471	0	0	0
NOCLEBFK_01297	13.1566	34.1655	108.846	4.44733	39.5329	78.4688	162.54	111.859	177.18	0.614063	0.113449	0	31.8785	0.153136	0.674022	0.177753	0	32.7083	53.0607	101.187	46.2014	116.329	33.1149	31.2218	32.7287	6.69642	73.482	34.4386	47.0051	0	0	0	0.227929	14.0625	18.6751	69.4588	4.79968	125.592	9.34007	0.100996	16.8338	3.21006	1.07581	0.151151	0.135123	27.589	0.971521	0.107284	44.3296
NOCLEBFK_01298	47.2588	78.4412	8.01777	77.1424	60.86	120.481	71.628	70.394	12.1744	2.15671	28.8879	28.8127	17.3753	22.8583	38.1398	20.55	23.1398	94.9708	81.5957	129.331	40.8625	63.2397	30.2489	47.9749	20.5911	7.51306	12.3626	13.5348	30.2264	15.8426	19.7634	12.2722	15.01	20.1097	19.6007	122.61	3.6968	5.6874	4.71885	19.5094	17.0315	12.011	56.6768	1.16128	62.2883	26.7182	69.7198	4.35677	64.2447
NOCLEBFK_01299	39.2759	54.3788	66.3803	0.106057	0	0	19.0449	0	0	0.074683	0	0	0	0	0	0	0.083795	0	0	0.121246	0.090924	0	0	0	3.41425	0	0	0	0	0	0	0	0	0	0	0.092426	0.204823	11.6094	0	0	0	0	0	0.091916	0.082169	0	0	0.06524	0
NOCLEBFK_01300	147.411	0	0	0	38.5814	0	0	0	0	0	0	0	0.457441	0	0	0	0	0	0	0	0	0	0	0	0	0	0	0	0	0	0	0	0	0	0	0	0	0	0	0	0.584508	0	0	0	0	0	0	0	0
NOCLEBFK_01301	72.209	68.96	0	1.63789	46.3402	14.7385	55.8663	28.5463	0	0	168.605	0	0.254576	0	0	0	0	111.716	0	105.092	25.0997	38.2073	139.946	2.29073	0.160756	0	36.6768	4.23699	130.786	0	0	0.238653	0	0	72.2242	0.892107	0	0.16008	0.174039	0	0.325291	0	16.9918	0.177438	0	0	0.175459	54.029	0
NOCLEBFK_01302	28.8016	3.90039	0	0	0	0	0	2.83393	0	0	0	0	0.161747	0.114217	0.111716	0	0	56.6648	15.5142	0.297422	13.0478	0.772007	0	30.273	28.7007	22.864	0	0	0.093366	0.343596	0	0	0	6.00594	0.893401	107.58	0	0	18.5769	0	0.103338	0	0	0	0	0.11004	0	0	0
NOCLEBFK_01303	233.267	52.6992	0	52.3953	0	0	0	0	0	0	0	0	0	0	0	0	0	35.5816	0	0	0	0	0	4.08137	0.520759	0	0.254962	9.7222	128.53	0	0.302991	0	0.433386	0	0	0	0	0	0	0	0	0	0	0	0	0	0	0	0
NOCLEBFK_01304	190.474	0.201994	0.967442	0.202101	1.07316	0.393209	27.3708	0	0	0.142315	0	0.380253	0.251298	0.177453	0.694272	0.13732	0	31.8787	1.33909	0	0	0.399809	51.9899	0	12.3775	0	16.3154	0.348536	0.580233	0.355884	6.83226	0	0.528248	0.676168	1.38803	61.6434	0.390306	0	0	0.936268	0	0.169082	0	0	5.01056	1.19674	0	0	0.662826
NOCLEBFK_01305	111.733	27.8448	122.142	21.9467	38.4334	67.0031	58.1414	117.489	80.2253	69.3572	0.069301	0.050113	2.64943	0.140317	0	0.072388	0.210436	39.8138	33.8244	76.609	106.04	38.3933	31.4521	40.409	24.8863	6.04496	14.4163	9.59993	15.4082	0.844219	0.048671	1.49023	1.39233	21.3152	17.4277	16.2941	0.462936	38.6927	0.724505	0	5.33198	13.0132	20.3722	0.138498	14.5272	4.59628	32.4579	0.163838	0.058235
NOCLEBFK_01306	16.6367	0	0	0	0	0	0	0	0	0	0	0	0	0	0	0	0	0	0	0	0	0	0	0	0	0	0	0	0	0	0	0	0	0	0	0	0	0	0	0	0	0	0	0	0	0	0	0	0
NOCLEBFK_01307	336.604	407.458	705.462	339.654	159.752	510.683	59.0499	940.774	862.974	0.921095	0	167.764	202.765	0	0.374457	0	0	342.277	108.818	122.122	557.333	308.506	141.005	89.7626	119.138	273.065	35.5342	70.3059	0.6259	0	54.9761	0.508242	1.13965	194.016	431.487	332.855	0.842049	226.365	1.48255	244.409	473.494	187.861	85.5757	0.377877	100.329	0	0.373662	199.28	254.061
NOCLEBFK_01308	186.985	136.629	31.7558	42.3044	101.997	35.3352	110.19	230.575	23.7009	18.8388	33.3901	60.0549	38.8096	25.4	42.7763	10.8622	26.2069	36.2032	62.9301	121.094	57.9913	93.7292	63.5456	36.6252	26.1293	28.9508	38.2949	26.632	21.6998	36.1942	30.8029	35.7483	20.4662	42.2066	55.407	70.2272	25.3081	34.3525	15.9931	88.4189	40.2595	31.9355	16.2218	26.0133	85.7733	24.195	67.2902	29.0335	43.2761
NOCLEBFK_01313	107.269	58.5292	224.626	31.1734	23.4237	17.3518	1.98209	5.02181	1.62893	0	0	0	0.136486	0.096379	0	0.037291	0.086725	51.4892	27.7583	66.6957	29.7836	15.7793	33.212	30.3348	4.39549	0	0.084393	0	0	0	0	0.063974	0	0	30.9087	89.4873	0.211984	28.279	0.093307	34.3879	12.5131	27.8253	0	0.09513	3.52925	6.22123	1.92841	0.033761	13.1399
NOCLEBFK_01314	97.5611	168.777	0	0.192989	34.5864	0	0	1.5136	2.9458	0	0	0	0.239969	0	0	0	0	66.0157	36.8698	0	12.078	0	38.2984	6.47788	0.151532	0	0	0.166412	0	0	0	0	0	0	71.5746	0.168184	0.186355	0.150895	0	0	0.153313	0	0	0	0	0	0.496174	0	0.210982
NOCLEBFK_01315	179.455	8.34787	34.8116	8.20825	0	0.70044	31.0599	1.00392	195.874	0	0	0	0	0	0	0	0.113777	34.9966	0	0.164628	1.72839	0	0	0	2.60061	0	0.110717	0	0.10336	0	0	0.16786	0.188198	0.096359	17.1731	1.38045	0	196.478	0.244825	0	0	0.240955	215.772	0	0	0	0	0.177166	0.15743
NOCLEBFK_01316	87.2037	0	0	0	0	0	0	0	0	0	0	0	0	0	0	0	0	0	0	0	0	0	0	0	0	0	0	0	0	0	0	0	0	0.128087	0	0	0	0	0	0	0	0	0	0	0	0	0	0	0
NOCLEBFK_01317	483.167	7.56397	351.203	91.6562	58.3257	8.99816	316.339	17.953	0	1.18426	0.546985	5.1419	2.09116	12.9208	0.361083	0	0	34.3163	40.3939	2.40327	1.44179	4.15873	4.12028	30.1067	0	2.15242	1.61628	7.2508	3.62128	7.03348	4.22565	4.9009	2.74736	27.5707	2.62509	1.4656	0.405988	97.3059	0.714802	1.94777	4.34206	0.703503	0	0.728763	2.93168	1.06699	3.60317	0	0.459638
NOCLEBFK_01318	102.4	101.426	150.858	0.121678	18.4951	0.118369	40.7704	35.7336	25.7958	0	86.7487	0	0	0	0	0.082676	0.096137	109.021	0.403112	0.139104	0	0.080237	40.8409	19.0598	48.6297	0.10382	0.093552	0.104921	0	0	0	0.141835	0.318041	28.9854	23.4752	18.5567	0	25.497	0	20.1521	32.672	0	2.04699	0	0.188543	0	0.312833	0	0.133022
NOCLEBFK_01319	66.1089	0	41.2484	0	0.644451	0	0	80.5196	114.719	0	0	0	0	0	0	0	0	0	0	56.9783	0	1.92073	36.8702	8.32849	18.5505	0.138071	0	0	7.78181	0	0.887108	0	0.211481	0.10828	6.56724	54.9979	0	42.1324	0	0	0	0	0	0	0	0	0	0	0
NOCLEBFK_01320	98.9281	230.29	385.434	75.1668	249.88	94.9247	127.573	143.514	335.791	492.781	0.163803	59.5792	0.626229	1.10553	0.216264	0.513298	4.17812	198.949	149.747	274.061	386.323	14.2805	59.6891	46.3474	168.458	0.752004	0.580823	61.5581	3.16297	5.65371	3.91134	0.146765	0.164548	101.774	133.248	184.008	0.121579	12.9947	0.963262	1.02076	0.600136	9.37502	37.8442	0.10912	113.059	0.319528	1.18693	0.542156	0.688229
NOCLEBFK_01321	5.68593	14.2381	85.3984	0	9.89331	54.021	85.4817	117.129	158.162	4.27264	0.171603	0	38.5429	0	0	0	0.104216	1.08868	106.77	1.05556	37.6562	83.7617	33.447	1.03307	66.5944	2.02581	0	63.1246	0.094674	0.232272	0.120518	0	0.172383	0.353047	0	4.48302	0.127369	96.5324	10.9883	0	0.104786	0.110353	0.295868	6.63031	52.1188	28.4532	0	0.081139	0
NOCLEBFK_01322	265.132	63.1221	3.6464	41.8265	109.579	56.8568	319.286	297.627	312.409	0.195055	0	386.187	0.344426	0	0	0	0	3.04832	299.773	392.35	206.838	0	150.996	113.431	247.29	11.5809	0.851873	141.16	0.994077	0.731656	0.253087	0.322883	0.362005	138.641	132.65	173.321	0	35.9521	125.738	132.815	170.979	0.231742	4.34926	0.240063	3.00449	0	0.47477	0	0.302821
NOCLEBFK_01323	35.5047	0.115355	0.414364	32.2009	9.26951	1.23504	2.08411	46.4665	98.166	104.598	0.150153	0.868617	0	0.709379	2.47802	0.941047	1.82378	1.48182	1.91182	22.8264	86.5782	12.025	111.268	0.774805	7.79351	0.492384	16.9487	2.58754	0.497038	0.304857	0.210906	0.672673	0.452506	92.5975	8.86354	6.13542	2.1175	1.44386	132.449	377.486	27.3229	26.5538	0.388327	0.200052	143.965	4.29587	1.48366	0.141993	0.252351
NOCLEBFK_01324	132.67	45.0184	504.731	17.2564	37.2741	31.2979	97.1205	196.511	221.486	391.734	9.51278	38.7964	29.8217	85.7751	28.8867	9.73779	6.93263	28.1638	145.023	3.00932	167.248	75.2187	107.127	12.4354	20.8983	15.2229	68.3615	38.5869	34.2185	76.9981	4.54299	14.6601	7.64483	55.1904	25.2009	79.7799	3.95397	97.4202	9.69644	22.357	26.7203	31.0765	3.28028	9.63234	9.06413	22.2677	31.8332	25.908	3.51723
NOCLEBFK_01325	42.0956	107.621	0.123312	38.228	64.7003	30.0714	112.259	86.8298	79.6018	0	0	104.981	0.128123	0.090474	0.176986	0	0	81.6442	28.3334	30.7451	103.443	94.2426	61.2182	3.45865	84.1418	45.9811	40.0865	27.1881	0.073958	0	0.094146	0.12011	0.269325	110.731	32.8751	39.1512	0	33.8375	0.437953	37.8302	0.163713	1.3793	43.2207	0.446507	67.2982	0	0.088305	11.219	0.33794
NOCLEBFK_01326	334.393	0.307612	0	26.7763	77.6289	0	25.0094	66.5148	310.843	654.302	0	0.289539	1.91348	5.40479	0.264322	0.209122	0	10.1611	15.2945	0	23.7472	3.85611	12.8187	67.8385	0.483318	0.262605	2.60295	66.0818	0.883624	0.541968	1.12483	0	0.804456	136.747	4.03543	0.268215	0.891581	1.20322	12.5581	0	0	0	0	0.533473	52.6979	0.260356	12.6605	0	0
NOCLEBFK_01327	0	0	0	0.405943	0	0	0	0	0	0	0	0	0	0	0	0	0	0	0.448288	0	0	0	0	0	0	0	0	0	0	0	0	0	0	0	0	0	0	0	0	0	0	0	0	0	0	0	0	0	0
NOCLEBFK_01328	0	0	0	0	0	0	0	0.160294	0	0	0	0	0	0	0	0	0	0	0	0	0	0	0	0	3.75516	0.156947	0	0	0	0	0.840327	0	0.480788	0.123084	0	0	0	0.143822	0.156363	0	0	0	0	0	0.142512	4.6681	0	0	0
NOCLEBFK_01329	0	0	0	0	0	0	0	0	0	0	0	0	0	0	0	0	0	0	0	0	0	0	0	0	0	0	0	0	0	0	0	0	0	0	0	0	0	0	0	0	0	0	0	0	0	0	0	0	0
NOCLEBFK_01330	0	0	0	0	0	0	0	0	0	0	0	0	0	0	0	0	0	0	0	0	0	0	0	0	0	0	0	0	0	1.49857	0	0	0	0	0	0	0	0	0	0	0	0	0	0	0	0	0	0	0
NOCLEBFK_01331	0.101392	0	0	0	0.137388	0	0	0	0	4.37267	0	0	0	0	0	0	0	0	0.571444	0.118315	0.088726	0	0	0.115795	9.02	0	0	0	0	0.182244	0.09456	0	0	0	0	0	0	0	0	0	0	0.086585	0	0.089694	0	0	0	0	0
NOCLEBFK_01332	199.388	113.74	0	49.5866	92.11	0.347036	63.8812	0	129.023	0	0	0.335602	0	0	0	0.605977	0	0	28.1674	0.203914	0	0	17.043	28.9378	78.5695	12.6319	0.822832	5.53697	0	0.157047	1.95567	0	0.233109	0.119354	78.9595	0.155443	0	0.697319	0.151625	0.206582	0.283398	0.447684	1.60038	0.154586	0.138194	0.75444	0.91717	0	1.16999
NOCLEBFK_01333	55.2742	70.5422	0	42.6988	30.163	60.9716	29.0707	9.37405	15.9169	0.927536	0	0	0	0	0	0	0	46.5064	19.2732	0	0.376412	0.651437	8.47108	4.54408	23.9597	16.2025	0	2.46088	0	0	0	0.127949	0	37.2384	0.616804	0	0	34.0721	0.093307	18.942	33.3973	0.183665	14.0341	0.09513	0	0.928542	0	0	0
NOCLEBFK_01334	76.8112	29.3856	2.86058	35.6159	3.96648	145.565	50.1175	98.9431	419.387	0.168322	0	0	0	0.209882	0.205286	0	0.188859	83.3001	71.5349	0	2.25417	36.0958	130.009	84.2453	24.962	1.42766	9.37277	1.23668	0	0	0.2184	0.27863	0.31239	0	99.247	156.232	0	0.934478	29.8693	0.830522	0.189891	0	0	0	0.185194	0.202205	0	0	0.522635
NOCLEBFK_01335	6.613	0.481891	0	2.89287	3.52028	1.56344	3.86948	2.38089	0.817719	0	6.48168	1.51193	1.79854	1.27003	3.03655	0	2.92054	5.60072	3.54958	0.183732	0	2.22556	0.787495	2.15782	2.01905	6.8564	1.35922	8.73066	0.922829	4.1036	2.49632	10.4909	1.05018	3.54884	4.41517	0.420173	1.24152	0.879621	6.42102	2.04749	6.00068	0.672289	0.180247	0	1.86774	5.43815	3.0301	0.889759	0.702792
NOCLEBFK_01336	40.804	23.6173	2.33959	15.3848	2.426	22.8217	52.8678	63.627	18.8848	1.37665	63.9163	0.879592	54.2191	0	0	0.231015	0.537258	0.155901	14.5491	0.291516	108.795	23.9895	17.4926	0.095102	3.00329	0.290098	21.8273	0.732933	21.4139	0.149677	0.232986	0.09908	0.777592	1.53566	88.946	46.148	0.328308	17.8111	0.433526	0	0.135049	0.071112	0.095329	0.66299	25.3538	2.01329	1.1655	0.41829	3777.89
NOCLEBFK_01337	25.8995	0	0	0	0	0	0	0	0	0	0	0	0	0	0	0	0	0	0	0	0	0	0	0	0	0	0	0	0	0	0	0	0	0	0	0	0	0	0	0	0	0	0	0	0	0	0	0	0
NOCLEBFK_01338	108.438	436.683	0	0	0	333.885	0.487009	0.423045	0	0	0	0	0	0	0	0.329852	0	137.122	0	0	0	0	14.867	0	0	0.414212	144.818	1.67441	107.319	0	0	0	0	48.4011	0.606206	0	0	5.314	0	0	0	0	0	0	0	0.410664	0.416036	0	0
NOCLEBFK_01339	87.8433	0	0	0	0.214081	0	0	0	0	0	0	0	0	0	0	0	0	0	0	0	0	0	0	0	0	0	0	0	0	0	0	0	0	0	0	0	0	0	0	0	0	0	0	0	0	0	0	0	0
NOCLEBFK_01340	19.1984	18.1243	29.0518	48.5518	38.4389	21.624	76.5815	26.2524	5.70456	1.85363	28.9189	36.5952	24.0029	40.3194	35.1664	6.16064	4.15958	41.3069	28.1001	7.02174	23.8209	14.0794	45.5023	37.3061	25.7209	3.74334	10.7939	32.0296	34.0085	23.4342	26.9907	11.9326	18.3476	49.1234	43.0971	16.8226	6.21338	26.5276	18.8956	43.0204	39.2673	30.8318	15.7453	17.2368	23.1135	59.8754	34.3398	13.6737	11.8307
NOCLEBFK_01342	10.5607	0	0	181.55	76.8216	96.0329	214.572	0	254.025	0	0	0	99.4686	0	0	0	0	0	389.071	0	710.612	77.0684	260.62	16.5043	2.22734	0	1.3086	129.152	408.841	0	0	0	0	0	0	47.4644	0	12.4207	0	0	0	0	0	0	0	0	0	0	0
NOCLEBFK_01343	0.504192	0.514368	0	0	60.9745	0	0	93.0583	58.916	0	0	0	0	0	0	0	0	0	51.1489	0	17.4276	0	55.7927	0.863717	0	0	0	0	0	0	0.235108	0	0	37.0193	45.6278	0	0	0	0	0	0	0	0	0	0	0	0	0	0
NOCLEBFK_01344	169.227	4.98843	0.952209	10.6331	7.10579	38.7721	26.0509	49.6711	4.47778	0.254681	2.07031	3.47047	1.79885	5.33505	3.72731	1.37616	0.228603	4.6435	40.2592	3.30773	2.35648	9.01505	2.03799	27.0313	25.4444	1.3578	25.0818	3.92946	3.11508	6.62349	1.3879	1.77065	1.70159	3.0009	18.7426	1.13466	0.209542	0.622124	0.922325	1.25663	2.35599	2.11807	2.51488	2.44488	0.896667	2.75353	5.26915	0.40046	0.553543
NOCLEBFK_01345	147.7	4.27861	312.506	172.909	0.370623	85.4615	87.7579	169.007	109.852	342.866	0.484287	114.163	31.2434	0.326851	0.319694	0	0	36.3569	89.6151	137.243	121.43	75.359	16.644	47.064	65.3254	65.5879	0.286202	57.4561	11.3553	0	1.36047	0	0.243245	116.323	34.6304	24.979	0	78.8759	0.316434	79.1119	0.295719	0	145.913	0.161307	59.8439	0	0.797539	0.114493	0
NOCLEBFK_01346	311.961	197.172	163.204	101.683	91.1689	304.793	171.176	208.968	192.466	10.3384	2.26374	38.9794	21.7712	2.48271	0.653786	0.073893	0.257772	56.9477	123.578	91.5043	279.981	120.478	133.752	94.7874	88.8056	141.414	76.4227	59.3594	3.59061	2.39379	2.88157	0.633835	1.27914	37.1127	187.542	249.918	12.2865	197.187	49.8281	60.5834	184.969	61.1414	93.1841	37.9832	95.9683	1433.67	1940.14	32.5791	1844.46
NOCLEBFK_01347	91.4469	0	25.7974	0	0	0	78.1033	49.2424	60.3416	0	0	0.196887	0	0.183763	0	0.142203	0	35.3153	0.231117	97.1393	0.358846	89.7053	0	0.234163	0.821641	0	0.160909	0	13.219	0	0	0	0	194.938	0.130671	0	0	77.5642	0	0	54.5333	0	0	0	4.54012	0.177042	0	0	0
NOCLEBFK_01348	442.471	315.224	478.131	367.681	345.692	388.842	411.152	416.159	375.562	202.555	211.806	273.781	372.761	264.106	240.767	119.487	154.661	448.249	276.635	441.517	256.147	233.731	261.255	256.797	246.779	157.677	194.284	239.614	251.459	181.43	166.096	286.046	127.256	369.442	435.431	288.451	154.477	296.759	215.194	255.46	283.681	269.665	265.495	142.442	274.118	197.474	230.245	163.246	256.5
NOCLEBFK_01349	217.455	129.83	385.44	95.9741	108.372	164.786	164.993	324.954	204.305	181.907	105.877	90.0713	1410.58	0.161668	0.118596	0.688077	0.254581	90.8437	106.29	304.319	256.664	172.864	105.162	72.5151	124.186	109.421	49.3699	61.3235	81.4735	0.162113	10.0938	0.590216	0.300786	37.2076	62.2795	216.617	2.71135	91.4882	5.39979	34.1193	4.35152	0.192552	5.31738	0.438825	3.78027	19.742	1.81462	0.198207	19.4747
NOCLEBFK_01350	382.3	307.927	47.1797	182.882	54.7583	0.710214	165.889	13.9966	247.95	0	0	0.343407	0.453895	0	0	0	0	7.03004	85.0566	0	5.94599	73.8985	63.0499	334.908	61.6231	0	1.12262	115.833	1.57203	0	0	0	0	94.284	32.5918	0	0	88.4784	0	0	0	0	0	0.316362	143.387	0	0	0	0
NOCLEBFK_01351	6309.98	868.505	767.248	2112	806.828	890	783.126	1050.61	507.706	374.434	0.761023	1.10061	467.328	0.770435	1.75832	0.596191	0.693263	714.02	1238.02	277.192	154.209	61.3322	752.042	615.551	191.988	4.49201	76.4569	334.924	61.7192	1.54511	0.534469	0.681865	1.14672	218.217	1049.12	355.313	0.282426	327.707	66.6319	417.67	758.858	729.93	17.3855	0.253483	188.081	0.989675	273.465	0.899584	0.319748
NOCLEBFK_01352	223.894	52.2999	125.181	59.713	110.977	106.446	114.763	60.7543	108.558	36.0364	20.3072	17.6902	11.0722	0.275951	0.224924	0.533853	0.08277	66.9144	96.2518	33.1743	41.1785	141.167	51.5242	42.4307	3.20797	23.6423	0.161088	51.0379	56.6192	0.184474	0.239292	1.16008	0	23.4831	36.1708	120.098	13.5046	15.3581	0.311682	52.4143	33.5386	16.521	0.82244	0.045396	10.7948	0.620336	0.359114	0.902186	0.114526
NOCLEBFK_01353	7.68893	3.92206	0.853841	89.898	16.8119	11.7992	4.29454	1.2435	1.51257	0.502415	0	7.38325	18.6303	10.3367	24.8163	14.5435	9.58314	4.25302	1.18185	5.7096	2.44668	58.8103	41.078	2.39485	1.12042	6.69642	0.548555	1.23044	1.28025	12.5638	3.5854	33.6826	1.39866	6.92252	2.89555	1.55443	4.47817	0.836783	0	0	1.98378	4.47684	0.800188	0	3.86942	7.84618	1.83434	2.63333	1.55998
NOCLEBFK_01354	638.133	0.584655	920.557	153.26	212.384	151.937	393.764	60.4061	1179.36	1134.63	0.761023	0.550304	21.4571	0	0	0.19873	0.231088	189.905	131.78	213.996	238.961	169.531	101.395	202.238	53.2791	102.068	80.5047	1.26101	147.37	0	0.267234	0	0.382241	303.156	174.032	256.162	0	1.82949	0.497253	184.276	27.185	23.9803	0.328028	0.253483	0.226603	110.349	226.843	0.359834	176.501
NOCLEBFK_01355	518.222	29.0173	72.4545	0.354056	0	0.344427	122.895	0.92561	0.30024	0	0.460619	0	0.440244	0.310877	0	0	0	495.485	60.2122	332.714	1.82121	150.823	540.408	192.921	17.5139	0.302094	96.0919	217.371	80.0493	0.311733	65.3459	0	0	102.583	0.663181	124.345	0	0	1.80581	34.0348	0	0	0	0	0	0.299507	0.303425	0.435588	0
NOCLEBFK_01356	154.406	0	0	4.32454	30.9369	0	255.481	0	0	0	0	0	0	0	0.412667	0	0	0	21.2251	0	2.0597	0	0	0	0	0	0	0	0	0	60.1468	0	0	0	0	0	0	0	0	0	0	0	0	0	0	0	0	0	0
NOCLEBFK_01357	254.369	197.326	151.999	96.7709	0	0	22.5365	6.40001	122.727	0	0.56204	0	0	0	0	0.293538	1.02399	69.7291	8.58739	0.493884	0.370368	0	43.9245	14.9843	101.763	5.52915	154.451	0	0	0	0	1.51074	0.564595	198.018	0	37.2721	1.25149	191.861	0.734475	0	0	0	3958.51	30.7016	0	0.365453	0	680.317	0
NOCLEBFK_01358	174.786	31.7967	0	19.4805	20.6977	21.3365	22.6358	34.074	0.059423	0.049344	0	83.523	0.087132	0	0.060181	0	0	3.85576	47.8227	40.4551	0	14.9714	11.6741	0	24.8693	0	0	1.8127	0	0	0	0	0	54.6726	17.8069	0.671735	0.067665	0.767051	0	0.081157	24.104	0.820753	0	0.06073	0	0	0.060053	0.043105	0
NOCLEBFK_01359	80.7337	32.2864	114.961	1.41268	12.5649	0.183235	38.4533	4.51389	30.5879	62.6713	0	0	0.117105	0.082693	0.080883	0	0	0	0.312008	11.628	33.9109	2.67046	6.46061	0.210747	31.7975	0	0	12.2626	10.2748	0	0	0	0.123082	12.3517	24.5792	43.7454	0	18.4829	0.160116	0.109075	2.76823	0.393962	0.105625	0	0	0	0.242133	0	0.102959
NOCLEBFK_01360	394.057	430.773	0	0	0	0	0	389.836	205.76	0.460547	0	0	0	0	0	0	0	0	0.722242	0	14.0174	0	0.801167	0	0	0	0	0	0	0	0	0	0	0	0	0	0.631537	0	0	0	0	0	0	0	0	2.76628	0	0	0
NOCLEBFK_01361	166.291	128.943	74.47	30.2096	13.2493	59.8186	33.7332	143.886	0.681626	276.973	0.174288	18.4004	51.9726	0.176444	1.26559	0.136539	0.052923	53.0131	34.9881	60.1127	41.9781	40.6368	43.3245	16.3381	39.7088	16.803	16.068	8.89486	61.1548	0.17693	0.244807	0.234239	0	35.9467	24.0896	37.3594	0	114.959	0.569401	12.6453	50.1263	53.5743	0.225373	0	28.8025	0.113327	0.86107	0.206021	0.219685
NOCLEBFK_01362	68.919	0	0	121.169	0	0	0	0	0	58.4334	0	0	0	0	0	0	0	72.9397	30.1228	0	0	0	0	0	0	0	0	0	0	0	0	0	0	0	10.2186	0	0	11.8986	0	0	0	0	0	0	0	0	0	0	0
NOCLEBFK_01363	436.781	686.234	0	129.116	602.935	109.35	507.448	27.1363	684.64	1.60449	0	0	0.944394	0	3.2614	0	0.600083	137.215	295.234	638.186	122.413	1.00167	290.281	71.382	1536.8	115.999	1.16789	0	0	0	0.693948	0	0.992595	420.803	27.5042	221.07	0.733397	550.495	0.645627	0	0	11.4376	76.6632	0	376.6	20.5597	0	0.467203	150.287
NOCLEBFK_01364	1134.98	152.328	457.493	433.425	236.94	164.025	382.999	777.025	28.7682	495.252	0.658735	0.476338	0	0.444588	0	0	0	354.763	212.479	320.106	388.074	98.4977	246.863	281.562	336.74	115.351	0.389297	134.912	0.363426	0	0.462632	0.590216	0	362.866	7.27122	442.581	0.488932	350.369	86.9445	71.544	0	0.423615	0	0	0.784584	0	0.43393	0	0.553543
NOCLEBFK_01365	987.37	281.814	1538.73	323.883	94.9111	297.199	71.4359	327.783	607.745	1044.93	1800.51	4.3219	193.509	8.57187	4.93187	9.36457	3.17605	200.65	220.055	171.348	572.075	81.0377	210.336	573.129	284.969	4.89982	133.339	205.003	225.461	22.7527	68.21	4.01635	2.25149	235.168	317.674	492.443	103.141	332.713	106.418	13.3019	268.702	30.7482	7.08459	7.96306	4.44916	28.6614	42.8162	2.47276	671.745
NOCLEBFK_01366	1403.29	276.066	1117.82	267.777	339.149	1177.35	1006.84	889.916	876.715	24.7458	0	175.214	745.451	0	0.603602	0.477546	0	457.627	263.888	1112.02	839.94	381.428	488.162	191.088	368.635	59.3683	267.482	29.0898	0	0.618814	64.216	0	0.91852	789.146	31.5951	919.35	0	727.027	60.3421	401.299	280.284	0	331.063	1.21823	76.7779	5.35089	0	0.432337	0
NOCLEBFK_01367	241.103	765.362	754.063	218.63	190.512	266.673	224.952	482.166	241.969	148.428	1.45863	47.4637	94.7992	34.4556	8.666	0.7618	0	76.6011	136.813	0.640873	368.618	353.769	207.388	233.327	970.124	4.78316	98.2697	268.28	2.81655	146.593	86.5617	0.653454	2.19789	3.0009	10.5004	245.244	1.08263	29.3671	1.4296	14.9329	2.67203	1.87601	1.25744	0.485842	0.868646	43.6282	8.16718	1.37936	7.96707
NOCLEBFK_01368	561.207	2.58597	1289.94	157.31	216.387	30.2036	659.282	527.598	434.425	3.2795	826.705	0.486807	292.119	0.454359	0.44441	0.3516	0.408848	34.168	173.719	304.661	70.0933	92.473	8.87446	351.438	230.376	0	149.593	0.892406	0.371413	0	0.945599	0.603188	0	194.943	14.539	235.85	0	47.7426	5.27853	228.938	0.822164	93.5118	2.32143	0	234.534	0	0	0	0.565709
NOCLEBFK_01369	295.255	0	0	0	0	3.37539	103.431	88.118	0	27.9237	0	0	0	0	0	0	0	49.094	0	0	0	0	0	88.1809	0	0.422932	0	0.854831	0.355775	6.98283	0.452892	0	0	66.3356	0	3.45574	0	0	0	0	0	4.14696	0	0	0.384033	0	0	0	0
NOCLEBFK_01370	276.801	0	18.0331	7.53431	66.2624	138.343	0	558.081	0	0	0	0	1.17105	0	0	0.639912	0	20.7286	64.4817	11.8433	2.42221	0	10.3831	10.5373	172.298	3.21428	0	0	0.675972	0	0	0	0	432.939	0	230.628	0	2.94548	0	3.27226	0.74817	38.6082	0	0	535.572	0	0	0	0
NOCLEBFK_01371	353.523	10.2315	281.767	260.527	134.536	1272.19	254.685	549.071	259.992	39.6471	0.665895	403.51	0.636439	1.34826	0	1.04333	0	172.738	137.917	730.261	407.651	134.333	373.065	247.971	210.992	682.598	0.787057	3.53082	0.367376	0.450658	0.46766	0	0	542.852	708.5	665.512	0.988492	29.6148	0	157.685	632.285	55.6685	328.93	0	16.2588	180.987	160.983	0	496.889
NOCLEBFK_01372	68.4049	5.68022	0	19.8912	62.2423	0.394903	131.131	0	0	0	0	0	0	0	0	0	0	106.472	38.5528	0	0	16.8644	0	0	1.27496	7.2737	0	0	0	0	0	0	0	0	0.506914	0	0	5.07841	0.690153	0	16.1243	0	0	0	0	0	0	0	0
NOCLEBFK_01373	244.508	443.193	496.224	294.047	67.3737	310.227	182.661	556.713	256.23	1.47375	0.340346	0	141.176	0	0.224674	0	0.206695	205.846	328.476	141.163	752.455	359.684	69.2208	183.525	65.9367	220.312	8.85002	263.252	0.93885	0.460673	9.083	0	0.341894	6.65199	196.823	85.2656	0.252615	135.001	0.444765	216.939	173.326	40.9282	33.4479	0.453452	46.212	144.51	99.5435	0	37.7516
NOCLEBFK_01374	627.682	11.3136	548.363	158.021	35.1628	50.2135	51.328	192.945	248.807	199.275	0	0	0	1.19269	0	0	0	76.4034	114.503	0.517629	281.038	0.298575	184.7	180.351	83.1912	3.86332	52.9144	127.67	231.39	0	0	0	2.9587	234.2	0.565404	231.622	0.437218	126.74	0	0	0	0	0	0	0.350799	0	0	0	0
NOCLEBFK_01375	438.118	89.8228	585.634	3.69329	37.3844	197.307	0.617515	80.7297	142.241	524.266	0	2.02677	2.67887	1.89168	0.528645	0.209122	0.486342	245.277	77.8322	28.5	174.674	0	62.5853	2.75486	121.555	0.262605	0.709894	151.272	382.609	74.2496	0	0	0.402228	108.121	67.4494	1.34108	0.297194	1.92515	1.04651	0.356455	0.2445	3.08989	0.345179	0	0.476904	6.76925	3.4289	1.51459	136.942
NOCLEBFK_01376	280.244	1.05369	1.26164	75.5539	146.249	102.899	0	177.616	145.722	0	0.457182	0	0.436958	0	0.301801	0	0	63.8099	121.078	74.7239	0	141.819	0	110.878	0.551849	0.29984	22.6954	0	0	0	0	0.409628	0.45926	0.47029	0.21941	0.612491	0	0	109.631	155.473	0	0	1.18237	0.304557	0	0	0	70.6872	0
NOCLEBFK_01377	28.7247	475.975	403.512	11.9945	306.366	219.104	200.101	190.853	3.39045	1.2513	0	0	0.552381	0.390063	0	0	0	156.442	227.138	207.716	0.380851	47.7495	68.0236	38.7695	271.025	78.8409	2.04932	2.68143	58.3504	0	0	0	0	4.45888	0	0.387141	0.857937	262.245	0	213.005	1.76455	0.743324	0.49823	0	86.3893	0.375797	0	0	0
NOCLEBFK_01378	58.6281	103.708	166.351	57.428	34.712	67.5386	137.329	103.706	20.6699	78.8068	1.17812	0.141985	0	0.066261	0.12962	0.051275	0.059624	0	63.4184	0.431357	85.916	105.148	62.5834	56.1485	35.2555	28.331	0.290101	29.6725	21.2866	0	0	0.087965	0	97.255	20.3545	41.8261	0.07287	12.0368	27.9689	0	53.0553	0.12627	1.60807	0.065402	0	12.7036	0.129344	0.139263	0
NOCLEBFK_01379	0	0	0	0	0	0	0	0	0	0	0	0	0	0	0	0	0	0	0	0	0	0	0	0	0	0	0	0	0	0	0	0	0	0	0	0	0	0	0	0	0	0	0	0	0	0	0	0	0
NOCLEBFK_01380	461.335	365.444	523.94	434.731	340.648	461.381	527.821	489.34	212.579	165.255	237.041	322.112	333.137	206.733	266.041	153.495	141.769	408.983	322.205	365.75	423.095	152.722	354.021	172.523	369.376	147.059	150.498	247.608	260.89	220.31	208.094	234.09	204.131	399.943	234.632	269.556	139.532	159.426	206.554	176.623	254.28	244.102	186.569	156.975	147.482	236.533	211.141	137.544	130.549
NOCLEBFK_01381	13.9799	0	0	0	0	0	0	0	470.713	0	0	0	0	0	0	0	0	0	0	0	0	0	0	0	0	0	0.548555	0	0	0	0	0	0	0	0	0	0	0	0	0	0	0	0	0	0	0	0	0	0
NOCLEBFK_01382	1327.02	17.0725	710.496	686.49	302.14	1390.88	188.033	1367.04	813.516	441.8	0	0	0.574043	0	0	0	0.729513	1035.16	367.069	707.223	393.807	380.233	555.35	115.188	251.93	51.9957	51.1124	204.615	229.3	12.1943	173.786	0	0.603342	2.16241	213.013	189.896	0.891581	120.201	102.034	0	156.969	92.6968	272.864	0.80021	1.07303	1.1716	0	0	1.0094
NOCLEBFK_01383	72.1693	0	0	87.6516	81.0795	0.453552	0	138.951	0	5.58129	0	0	0	0	0	0	0	0	0	0	0	0	0	8.34641	0	0	0.358462	0.402024	0	0.4105	0	0	0	0	0	0	0	0	0	0	0	0	0	0	0	0	0	0	0
NOCLEBFK_01384	0	0	0	0	0	0	0	0	0	0	0	0	0	0	0	0	0	0	0	0	0	0	0	0	0	0	0	0	0	0	0	0	0	0	0	0	0	0	0	0	0	0	0	0	0	0	0	0	0
NOCLEBFK_01385	84.7107	0	0	0	0	0	0	0	0	0	0	0	0	0	0	0	0	0	0	0	0	0	0	0	0	0	0	0	0	0	0	0	0	0	0	0	0	0	0	0	0	0	0	0	0	0	0	0	0
NOCLEBFK_01386	228.151	0	0	0	0	0	0	183.54	0	0	0	0	463.096	0	0	0	0	0	0	0	0	0	0	0	0	0	0	0.738263	0	0	0	0	0	0	0	0	0	0	0	0	0	0	0	0	0	0	0	0	0
NOCLEBFK_01387	378.42	318.641	110.422	1.27269	29.5663	60.6657	33.1956	0	0	0	0	0	0	0	0	0	0	240.433	97.6783	0	0	17.624	8.57465	0	6.99505	226.954	0	0	0.456738	0	0	0	0	13.1999	136.675	0	0	0	0.540931	0	0	0	0	0	0	0	0.545344	0	0
NOCLEBFK_01388	340.951	17.2663	199.071	129.287	56.0386	5.1501	277.849	375.389	191.39	286.662	0.362499	277.068	0.346464	0	0	0	0.220149	0	12.6157	3.18541	50.6419	74.2304	91.8165	106.932	129.955	0.237743	0	0	0	0	0	0	0	0.186446	6.43691	10.6842	0.538114	140.738	22.7383	0.645416	0	0	32.8125	0	60.2296	63.1694	112.948	0	0.913837
NOCLEBFK_01389	106.043	104.752	46.7656	46.9259	80.4187	26.7218	108.422	96.3191	46.8646	0.115137	0	0	0	0	0.140421	0	0	0.299892	11.5559	93.2738	37.006	9.27242	68.4997	25.6116	23.879	0	1.00568	15.2267	58.3261	0	0	0	0	7.65854	1.73548	72.3846	0	0	0	0	0.129891	0	0	0	0	0	0	0.100578	0.178748
NOCLEBFK_01390	183.187	322.239	498.955	252.633	242.518	793.128	153.443	132.092	94.7291	809.622	0	0	0	0.603601	0.295192	0.467089	0	100.869	288.095	459.352	496.524	243.428	263.999	122.295	331.685	143.411	207.186	93.657	163.812	0	0.314049	0.400658	0.449203	106.718	468.485	397.489	0.331903	76.5931	1.46091	0.398085	0.273055	9.20202	129.525	0.893665	107.852	0.581525	24.4489	0	0.751526
NOCLEBFK_01391	111.858	0.644722	0	0.32253	6.63652	0	0	0	0	0.227119	0	0	0	0	0	0	0.25483	0	0	0	257.982	87.6257	0	0	0	73.202	0	0	0	0	0	0	0	0	0	0	0	107.681	0	0	0	0	0	0	0.249884	0	0	0	0
NOCLEBFK_01392	23.3743	0	0	0	0	0.610784	1.25973	0	0.532426	0	0	0	6.24559	0	0	0	6.94496	2.87897	0	65.3178	0	0	0.76912	0	0	0	0.482728	0	0	2.21123	0	0	3.28218	0	0.784027	0	0	0	0	0	0.49878	0	0.704166	0	0	0	0	16.6075	0
NOCLEBFK_01393	272.919	45.4337	15.6227	24.9434	1.54732	0.907105	3.50791	0.609436	1.38378	0	0.909836	0.438609	0.86959	0.614059	0.400409	0.950364	0.184184	0.855139	48.9122	0.266502	0	45.1942	2.28451	4.43403	62.4163	0	56.8161	74.1735	0.836599	1.02625	0	1.08693	0	4.05567	1.60105	2.23468	1.35061	109.362	1.5853	2.69988	66.8538	5.26582	0.261448	0.202033	0.18061	1.972	2.79691	0	0.509698
NOCLEBFK_01394	0	0	0	0	0.59535	0	0	0	0	0	0	0	0	0	0	0	0	0	0	0	0	0	0	1.50534	0	0	0	0	0	0	0	0	0	0	0	0	0	0	0	0	0	0	0	0	0	0	0	0	0
NOCLEBFK_01395	112.188	0	0	67.9586	0	119.207	162.119	0	2.26886	0	0	0	0	0	0	0	0	0.490733	0	0	0	0	150.765	0	0	0	237.387	0	0.384075	0	0	0	0	0.358061	1.00231	0	0	0	0	0	0	110.13	0	0	0	0	0	0	0
NOCLEBFK_01396	0.649768	0	0	0	0	0	0	39.8794	0	0	0	0	0	0	0	0	0	0	0	0	0	0	0	0	0	0	0	0	0	0	0	0	0	0	0	0	0	0	0	0	0	0	0	0	0	0	0	0	0
NOCLEBFK_01397	231.138	281.188	326.045	59.3423	67.2958	68.4795	87.2492	361.048	137.011	116.819	0.468844	0.565044	167.591	0	0	0.081621	0	89.5638	29.7151	170.152	32.1314	31.9232	16.9226	29.1659	268.909	3.07489	0.923587	0.72508	46.9904	101.324	164.416	136.385	0.313984	40.9944	0	161.321	0.115997	19.8181	0.204229	0	0	0.201001	0	0	0.186138	0	0	0.369472	0.131325
NOCLEBFK_01398	447.632	464.434	568.742	147.796	168.555	235.394	180.073	353.338	315.897	24.6233	3.03279	9.35698	0	0.136458	0	0.211192	0.368368	109.315	169.391	91.1436	157.617	37.4057	155.918	119.11	251.007	214.153	18.0426	118.195	174.459	0.4105	0.283992	0.362311	0.40621	19.0304	111.588	214.259	0.150068	108.268	30.2529	80.6365	56.7918	11.4418	0.174298	0.538755	48.6442	0.262934	0	0.286798	0.169899
NOCLEBFK_01399	341.879	210.313	1024.44	121.022	163.527	392.473	329.652	367.435	489.89	42.5306	171.505	0	0.282862	0.798969	0.390738	0.309136	0.629072	245.338	216.17	178.664	342.854	90.3053	140.309	240.272	135.303	105.493	19.589	148.197	83.7618	0	11.7435	0.132585	0.297299	19.1035	289.323	433.168	0.549162	47.8462	1.16026	169.936	97.5873	134.27	3.06159	0.197153	27.4064	14.4328	208.016	0.419806	536.68
NOCLEBFK_01400	184.068	0	0.569227	62.3103	129.759	436.803	114.044	191.498	613.097	5.69404	0	0	0.591439	0	0	0	0	305.345	15.758	0	0	0	117.699	97.9228	0	0	2.92563	0	0	0	0	0	0	135.904	40.9832	0	0.459299	16.3637	0	7.71239	1.51145	0	0	0	0	0	0	0	0
NOCLEBFK_01401	194.173	44.0098	94.1892	0.382064	1.07779	92.8255	41.3948	264.358	8.01879	0.269042	0.248529	0	12.3518	0.167735	0	0.1298	0.075467	39.1551	22.1507	87.684	0.081887	28.3435	22.2312	0	24.3742	35.4516	5.87499	0	0.068557	0	16.5815	0	0.124829	4.92135	0.119274	0.166478	0.184465	20.0149	0.324778	0	21.1703	0	0.107125	0.165561	0.074002	0.0808	0.245571	0.117512	0.313263
NOCLEBFK_01402	285.683	1.25842	849.22	79.5736	134.718	25.9665	252.115	82.7291	244.717	5.85166	0.327606	0.710687	0.313115	0	0	0.342199	0.198958	255.643	110.677	185.394	122.19	63.7642	101.795	25.9207	98.8606	27.287	0.77443	70.3521	199.9	1.33028	0.230079	0.88059	0.329096	44.3154	97.9509	50.6927	0.243159	475.686	20.3355	0.874935	103.023	105.337	0.282419	1.96415	97.9387	1469.19	1585.52	0.619606	2618.02
NOCLEBFK_01403	392.458	323.858	53.3979	180.29	212.343	210.144	10.406	91.5404	28.9018	111.304	0.214204	0.154893	0.409458	1.01198	0.42421	0	0.390264	108.716	128.185	144.371	7.90465	3.69148	10.0846	78.109	193.79	26.8325	13.0387	1.27776	6.49973	0	0.601745	3.64655	0.430356	117.554	131.379	76.0474	0.317977	79.0438	24.4932	39.6637	113.403	115.158	242.642	0.28539	61.9958	0.557125	4.6564	0	0.359997
NOCLEBFK_01404	506.704	263.825	364.13	597.105	565.434	373.967	469.727	241.199	197.19	28.158	51.1905	42.9965	186.873	0.530085	0.640474	0.096518	0.252524	477.277	433.11	306.964	238.354	190.058	283.591	265.142	183.308	79.751	87.672	277.219	232.257	31.0798	12.4272	0.413953	0.603342	514.321	501.48	175.444	8.98439	525.01	184.266	421.124	838.249	589.665	712.968	1.47731	370.444	98.775	77.0589	109.313	489.754
NOCLEBFK_01405	392.864	546.446	639.464	115.493	70.0789	0.964396	8.95072	0	0.840673	0	0.644867	45.2321	3.69805	0.435228	2.97989	0	0.391633	42.2754	105.098	11.3333	2.12475	0.326861	0	128.112	238.579	0	20.5795	0	0.355775	0.436427	5.43471	3.46674	0	11.6087	0.618969	7.34345	0	0.387562	0	2.29632	0.393773	0.414696	0.55592	0	1.92016	2.51586	0	0.304912	0.54189
NOCLEBFK_01406	228.948	106.733	86.7271	80.1318	26.3821	75.0022	9.44798	118.098	154.178	0	0	0	6.15297	0	0.411268	0.10846	0	2.19582	61.344	3.83221	81.4246	106.945	14.4699	29.4688	1.37869	0	1.10455	0	59.8063	0	0	0	0	3.63159	0.498322	0	0	58.7847	0.135691	8.68904	0	37.393	0	0.415024	0	0.540128	0	0	0.349014
NOCLEBFK_01407	64.3271	1.54673	67.2009	0.221077	35.6581	100.22	8.20599	0	114.547	0	0	0.415958	0	0.194116	0	0	0	78.8675	0	13.3952	42.0759	0	0	37.3507	67.6986	0.754526	0.339949	0.190631	0.158679	0	0	0.2577	0	49.8529	0	0	0	0	0	127.51	0	0.184958	0	0	137.711	0	0	0	0
NOCLEBFK_01408	237.852	7.71553	7.39062	60.2127	73.7843	0.750964	0.774425	16.4814	74.6269	6.52316	8459.72	0.36311	0	544.624	12025	23155.4	24518.8	0.353971	75.4447	6.61886	33.0903	64.9034	27.8964	9.93274	148.199	7.90397	8.90277	0.665647	0.554075	0.33984	1.05799	9.89822	7.06207	51.1382	0.481984	5.71826	9.31776	16.5985	5.24969	194.458	0	0.645839	9.09066	9.36639	130.083	0.326512	0.661565	5.22349	10.1271
NOCLEBFK_01409	124.749	38.9004	58.9411	61.0241	58.8439	118.963	67.0035	170.213	20.5772	260.961	0	0	0.149368	0.738333	30.5373	0	0.094911	28.9733	16.3168	52.3227	110.091	50.2216	46.0589	39.6494	99.5087	33.9262	0.646511	19.6807	80.3579	0.211533	0	0	0	122.501	31.5761	64.9053	0.115997	31.8404	0	15.7213	14.5053	3.31651	68.4406	0	0	2.03237	0.205895	0.073894	0.262651
NOCLEBFK_01410	163.113	60.8124	122.895	46.8206	35.9546	18.1317	56.3643	27.6042	31.4972	105.347	0.174869	3.58274	6.62963	0	0.192395	0.091329	0.0354	55.3058	54.9206	105.772	71.6753	94.6327	19.3195	30.4791	48.2665	30.3537	3.1003	15.9173	7.55725	0	0.081874	0.104453	0.117109	15.35	27.5267	55.9523	0.129793	21.5446	3.12309	40.7346	42.2492	27.9634	26.0293	0.116491	1.18023	0.037901	0.844739	0.27561	0.048981
NOCLEBFK_01411	2.30668	0	0	0	0	0	0	0	0	0	0	0	0	0	0	0	0	0	0	0	0	0	0	0	0	0	0	0	0	0	0	0	0	0	0	0	0	0	0	0	0	0	0	0	0	0	0	0	0
NOCLEBFK_01412	99.7031	159.927	116.044	68.1558	135.408	278.771	133.173	424.392	38.487	253.822	279.711	0.145722	0	2.85618	0.266061	0.210497	0.244771	66.3394	113.753	0	188.306	120.122	45.3502	136.05	174.045	57.7566	75.982	1.46924	79.7158	0.272767	15.9928	0.18056	0.202437	1.24379	159.191	55.8858	0	66.6123	53.328	0	16.7354	0.129593	3.82195	0.268491	53.6446	24.2413	101.818	0.095285	3.55615
NOCLEBFK_01413	84.816	55.9601	97.6019	70.0678	114.605	91.9324	331.491	341.679	142.163	36.8058	67.157	0.152232	0	0.142085	0	0.109951	0.255705	112.933	172.623	260.657	247.909	48.6585	228.159	174.536	170.385	103.415	108.365	153.767	100.815	0	0.147851	0	0.422961	69.0825	0.303103	77.2792	0.156257	213.572	22.5592	87.1477	54.7629	0	0.725944	0.280486	76.2259	0.136888	0	0	0.353811
NOCLEBFK_01414	118.698	0	0.391344	0.163505	0	23.6997	3.6086	82.0707	131.859	0.230274	0	107.365	0	0.143565	0	0	0.129185	17.8436	0	74.2078	0	24.0436	25.2367	0.18294	35.9468	14.7879	9.30257	0	0	54.8488	42.4272	0	0	5.90801	34.8116	12.9665	0.157884	0	2.77978	0	0	0	0	0.141704	0.126678	6.36244	0.840739	0	142.284
NOCLEBFK_01415	97.0619	0	0	75.396	8.77973	82.2242	5.57325	0	0	15.5551	0	0.124437	0	0	0	0.089875	0	10.6748	0.146071	207.621	11.2265	84.0842	55.7396	0	44.971	0	0	0	0.09494	0	0	0.154186	0	0	40.1373	16.2534	0.127727	0.620535	0.112441	0	0.10508	0	0	0	0	0	0	0	0.144605
NOCLEBFK_01416	42.3465	0.702458	0	21.9634	36.1542	1.36743	0	77.4772	0	0.123729	650.341	0	0	0	0	0	0	104.9	1.55228	0	120.207	11.5865	23.8915	28.3093	14.0721	0.749599	0	0	0	0.309407	0	0	0	0	8.99583	0	0	27.0643	0	0.203499	53.4606	17.1991	0.197061	0	61.5313	0.148636	0	0	0.192088
NOCLEBFK_01417	151.231	220.842	106.26	28.6066	51.9081	83.1245	113.86	141.479	66.9471	0.392419	63.9206	63.6969	49.8908	0.081552	0.159532	0	0	37.9036	34.9753	26.4389	207.902	23.641	52.3366	54.6612	34.859	27.3404	30.4919	29.0718	4.0665	0	0.254584	0	0.121382	32.7524	25.2837	105.385	0	22.6575	25.9754	75.0833	145.281	50.8964	80.5207	0.160989	0	0.078569	14.2478	0	32.3905
NOCLEBFK_01418	112.771	145.261	124.302	94.7602	54.7942	31.4818	36.3533	61.1309	146.417	54.7199	0	0	0	0	0	0	0.153108	117.824	145.304	25.9198	300.201	1.15007	52.699	77.6208	20.2367	65.4761	64.8107	14.5374	1.39089	0.170619	0	0	0.253255	2.72304	0.120992	93.3886	0.187122	3.18184	0	0	5.69594	0	60.4192	0	0	0	0.166072	0	0.4237
NOCLEBFK_01419	56.5173	0.302667	0.181201	30.7368	32.4619	0	43.4425	37.3409	112.092	171.235	0	0	346.608	0.132947	0.130036	0	0	147.605	7.69153	80.8366	86.1923	40.2376	0	3.38821	32.9317	0.775148	4.19089	0.652805	0	0.133314	0.138343	0	0	111.144	0.189074	6.59758	0.146208	36.3449	0.12871	0	0	0	133.474	0	0	0.128085	0.12976	0	0
NOCLEBFK_01420	1.04453	0	0	0	0	0	0	0	122.508	0	0.231179	0	0	0	0	0	0	0	0	0	0	5.50731	0	0	0	0	0.136621	0	0	0	0	0	0	0	0	0	0	0	0	0	0	0	0.199292	0	0	0	0	0	0
NOCLEBFK_01421	384.669	106.407	271.15	93.4964	53.15	327.522	291.199	208.547	58.4511	445.81	8.58264	0	0	0.199742	0.195369	0	0.179735	158.343	3.26579	138.094	148.024	135.008	114.532	73.3033	15.0039	1.1646	0.174902	17.0656	39.0235	0	0	0	0.594598	0.152219	101.696	361.997	0.219665	56.3838	0.193376	0.263467	0.180717	43.3929	0.255133	0	0	0	0.194954	0.139935	0
NOCLEBFK_01422	288.762	0	0	14.5866	3.2624	78.8158	16.3829	21.4158	0.134451	0.111648	0	0.149156	292.368	0	0	0	0	61.2144	48.6747	61.0837	25.2823	19.1329	49.1382	0	86.2723	0	5.11984	48.534	0	0.139598	0.144864	0	0	52.1974	27.6191	91.055	0	3.4711	2.9651	29.7478	0.503818	2.78559	0	0	54.1719	0	0.271754	0	0
NOCLEBFK_01423	124.74	0	0	0	0	0.667118	0	0	209.546	0	0	0	0	0	0	0	0	11.5298	1.76704	0.261327	81.9162	0.150737	0.840058	0	0	0	0	0	0	0	0	0	0	0	0.285447	0	0	0	0	0	0	0	0	0	0	0	0	0	0
NOCLEBFK_01424	113.695	171.799	0.307943	63.8152	0.170797	55.5713	78.2169	73.5497	1.30924	0	0	0	36.1553	0	0	0	0	0	7.38818	0	7.94167	0	0	0.287906	55.5618	0	0	0	0	0.453121	0.235108	0	0	0	0	4.48491	0	0.603581	0.218737	0	0	0.21528	0	0	0	0.217674	0.220522	0	0
NOCLEBFK_01425	295.951	0	0	0	0	0	0	0	0	0	0	0	0	0	0	0	0	0	0	0	0	0	0	0	0	0	0	0	0	0	0	0	0	0	0	0	0	0	0	0	0	0	0	0	0	0	0	0	0
NOCLEBFK_01426	19.8138	0.90509	0.722481	0.603711	0.200358	0	0	0.263047	0	14.2415	0	0	0	0	0	0	0	0.276824	0	0	0	0	0	0	0	0	0	0	0	0	0	0	0.788986	0	0	0	0	0	0	0	0.239798	0	0	0	0	0	0	0	0
NOCLEBFK_01427	322.662	134.129	156.537	70.0775	78.4352	88.2605	153.613	202.17	50.977	419.431	210.435	8.01161	2.5608	0.048873	0.191212	0.07564	0.131933	60.9484	66.6306	35.5071	213.781	16.8106	87.6169	17.3131	44.2725	0.6174	1.11267	23.7579	11.5459	0.196031	7.78107	0.129764	0.145487	122.648	108.707	221.871	0.48373	41.2575	28.342	68.5266	44.0412	24.9602	4.36982	0.144719	40.7093	6.2153	0.047702	0.102718	68.5785
NOCLEBFK_01428	353.735	199.51	489.93	121.911	134.683	260.295	150.534	121.551	379.295	347.836	259.516	6.45765	154.831	0	0	0.093282	0.433879	129.931	180.565	270.109	255.05	86.4563	172.884	160.518	335.46	98.6306	0.316658	4.38007	0.197076	0.241752	0.125437	0	0.538258	108.032	99.432	263.091	0.662837	47.1233	36.1777	0	40.5713	18.7218	3.07944	0.356945	20.2093	26.8273	0.117654	0.675606	128.173
NOCLEBFK_01429	165.322	133.071	46.7811	329.11	185.994	287.027	338.445	161.443	75.816	41.2449	0	87.3853	146.301	0	0.332395	0.087659	0.407728	263.366	185.78	117.548	597.368	121.57	333.935	145.213	175.651	67.6981	137.677	157.189	76.7645	0.681543	0.353628	0.150384	0.33721	234.724	65.8099	324.248	0.124577	132.95	67.4459	191.255	246.998	168.486	127.039	4.91965	283.069	0.218271	46.547	0.317442	0.564159
NOCLEBFK_01430	147.057	5.82037	0.600783	9.23716	18.5269	79.1154	65.0682	111.294	124.394	33.725	0	0.094455	0.124845	0	0.086229	0.068221	0.079329	53.8655	18.073	57.8508	44.4158	11.2555	11.5614	39.2061	68.9022	20.5604	29.7202	25.0207	5.62109	67.7159	16.6044	0	0.131217	16.9976	35.4818	36.0495	0.096952	63.7454	27.4825	12.2099	32.6227	67.0323	0.563032	0	0.077789	27.4339	0.172092	0	0.109764
NOCLEBFK_01431	102.699	232.367	220.883	105.892	135.076	60.7715	143.737	64.0275	102.438	0	393.433	0.890442	47.0773	0.103886	0.101611	0.080391	0.09348	66.5128	72.2532	127.009	187.65	27.853	48.2632	42.0964	127.086	62.1858	21.741	35.5034	32.6097	1.97927	0	0.137915	0.309251	80.7528	8.56914	123.936	0	86.5881	24.842	48.9194	27.9154	34.0509	0.663473	0.102539	75.6246	33.7292	0	0.291122	0
NOCLEBFK_01432	1197.8	238.518	947.81	373.519	284.838	509.286	413.403	606.432	718.052	1321.43	1.38603	0.20045	0.529886	0.374178	0.182992	0.723882	0.841745	326.913	312.714	740.757	277.659	694.1	449.987	294.903	477.481	205.801	113.037	198.98	43.8923	0.938021	7.39792	0.993486	10.5817	383.388	151.927	578.602	0.617249	305.876	61.9452	273.675	281.833	229.781	271.709	0.553991	106.973	35.5085	0.182604	0.655353	0.698817
NOCLEBFK_01433	635.169	378.701	736.662	120.151	134.69	75.3248	99.5934	132.625	23.0535	463.035	0.63157	40.8743	311.777	0	0	0.329852	0.191779	181.197	185.49	5.54983	151.908	82.9116	13.3803	152.629	240.33	20.7106	11.5705	143.999	59.9315	0	0.443554	0	0.634442	280.824	30.765	314.546	0.234385	3.03657	0.412669	0	231.585	262.167	0.544458	0.631093	156.088	58.9303	24.1301	0.298625	0.265358
NOCLEBFK_01434	223.297	86.2389	136.049	125.665	74.5332	35.5086	131.005	284.738	236.756	123.939	0.120833	0.087376	0	0.081552	4.38713	0.252431	0.220149	156.043	77.8483	84.6256	151.209	23.3961	25.1443	38.242	182.39	74.9682	33.9195	63.5096	40.7983	0.163552	0.169723	0	0	11.1868	55.9605	222.911	0	57.0068	0.31581	16.4581	5.01731	20.7471	9.99999	0.160989	38.2101	34.806	5.25338	0.057133	87.1192
NOCLEBFK_01435	65.1752	27.4018	2.83658	5.45163	1.04885	127.05	48.9837	91.0903	0.268	80.3393	0.308367	0.074328	0.392969	0.069374	0	0.107368	0.062425	2.536	48.6859	31.7942	57.9136	19.9544	14.5178	52.5983	70.97	0.134827	21.5648	19.6891	1.81469	0.069565	0.288757	0	0	0.740154	5.969	18.7971	0.457758	11.3668	0.201488	12.5363	26.8638	0.330505	5.05085	0	7.16196	2.33927	0.203132	0.145805	0.086375
NOCLEBFK_01436	93.4851	0	115.311	0.155411	14.029	66.521	26.3483	90.1965	9.35699	0	0	0	0.386485	0	0	0.52798	0.245578	0.712616	22.8257	136.627	0.799409	10.2481	1.33263	0.347767	3.05065	0	11.8292	0	0	0	0	0	0	52.7237	0	23.5658	0.150068	0	12.154	0.179992	0	0	7.14624	0.134689	50.2095	0.131467	0	0	0
NOCLEBFK_01437	6.39475	19.3385	131.677	27.7408	24.1382	143.549	105.471	26.4089	3.75597	0	0	0	0.579727	0	0	0	0	39.3364	43.5061	72.755	0	59.9516	50.5449	1.82578	0	0.198904	5.37692	0	0.16732	0	0	0	0	0	0	78.2139	0	0	0	0	0	0.19503	0	0	8.12743	0	0	0.143399	0
NOCLEBFK_01438	315.553	411.346	273.314	25.4283	3.43814	10.0779	346.741	701.705	283.517	0	0	0	0	0	0	0.319956	0	4.7503	108.683	57.6017	776.318	0	493.198	164.909	382.679	12.8571	36.5667	200.586	0.675972	0	0.430248	0.548901	0	0	129.364	134.601	0	144.328	0	0	59.1054	44.5177	15.8437	0	0	0	0.403555	0.289666	0
NOCLEBFK_01439	106.716	418.928	450.828	122.381	108.88	107.726	124.589	272.592	93.4671	10.9317	0	0.243404	0.321717	0	0.222205	0	0.204424	302.292	157.719	32.5367	154.161	144.852	188.899	160.955	203.356	62.4754	0.795706	79.8703	66.8544	0.227805	0.2364	0	0.676273	25.623	80.1258	292.895	0.249839	22.4552	0.219939	88.6985	73.3782	0	0.290178	0	37.8863	32.174	0.221733	0	207.615
NOCLEBFK_01440	435.587	637.172	402.712	281.754	108.305	190.236	352.337	324.329	417.627	120.409	196.202	21.929	0.389053	0	0.537426	0.106298	0.24721	268.433	75.1515	386.849	778.702	277.197	188.383	214.073	167.549	169.657	25.1388	66.505	26.163	0.137743	0	0	0.613364	153.988	340.7	124.747	0.453196	133.207	42.6886	132.811	0.745684	35.3387	0.175457	0.406751	114.661	0	0.134071	0.288704	0.513085
NOCLEBFK_01441	597.429	478.491	68.5634	30.6081	23.4419	497.025	103.928	219.539	826.591	0	1.02104	0	0	0.689111	0	1.06652	0.620086	0	245.273	491.678	43.0615	48.6479	73.0664	0.878112	639.648	391.741	1.81023	10.8279	0	0.691009	0	0.914835	0	0	187.186	227.755	1.51569	1.84092	88.7307	0	145.893	0.656603	0.880207	0	0	0	0	0	0
NOCLEBFK_01442	1644.97	1136.58	1217.49	620.245	1063.17	644.742	747.73	715.669	425.841	1350.88	51.6615	0.330593	220.664	0.617114	0.301801	0.238773	0.555301	618.441	757.901	433.479	466.366	126.525	437.365	599.606	254.402	196.695	222.902	285.14	423.239	0	0	0	0.45926	586.686	452.863	473.15	0.339333	264.049	94.6952	6.51195	108.317	2.64601	462.306	0.913672	1.90583	0.297272	0.602321	0.432337	0
NOCLEBFK_01443	487.698	0.70774	199.144	12.392	44.6512	324.795	43.688	68.8037	0	0	0	1672.39	0.880488	0.310877	0	0	0.279738	117.215	36.3619	32.381	353.922	0.93389	26.0229	45.5562	90.9057	61.023	0	127.614	73.1879	0	0.323494	0	0	0.236913	127.994	130.516	0	0	0	0	85.5051	194.315	0	0.306847	0	0.299507	0.303425	0	0
NOCLEBFK_01444	193.685	158.309	58.2164	3.89169	6.19951	81.7744	2.34247	3.73049	2.64013	0	0	0	0	0	0	0	0	120.631	125.491	123.238	174.159	5.90241	122.042	99.7129	0	0	0	0	131.842	0	0	0	0	3.90612	92.5767	150.243	0	16.4314	0	0	5.25574	0	0	0	0	0	0	0	0
NOCLEBFK_01445	1029.65	425.611	1656.6	510.271	589.55	739.259	278.96	318.024	1100.88	451.94	20.0687	0	0.504762	0.356437	1.39453	0	0.641468	274.743	60.0706	1149.53	627.826	327.65	292.398	141.709	103.591	213.015	317.415	155.067	491.537	0	0.741806	0	2.1221	220.023	447.858	452.821	0.391988	299.308	2.07046	293.375	563.707	291.056	478.954	1.05545	59.4424	318.675	218.824	0.998848	0.887578
NOCLEBFK_01446	121.523	1502.94	1013.99	2570.71	2819.47	2402.68	2583.63	967.561	772.077	237.557	405.065	125.532	1410.58	5.59234	2.86945	1.77359	2.47484	3881.15	2152.7	2664.21	1539.62	2155.52	2092.23	2126.63	2648.43	2081	2488.97	4546.71	2006.93	75.107	194.231	3.89464	4.09363	2648.47	2239.1	1471.69	29.3392	3609.84	1226.52	3799.25	5313.33	4800.39	4938.02	151.479	3082.3	282.462	1289.5	612.795	8.3326
NOCLEBFK_01447	250.531	196.43	9.78359	432.961	187.535	690.631	322.15	238.233	260.944	0.230274	0.425433	0.61527	0.406614	0.28713	0.842528	0	0.258369	80.6711	184.172	0.373843	249.23	89.7053	66.4968	95.4947	112.205	0.558035	0.754263	2.2558	79.3328	0.575841	9.85984	0	0.427367	25.3826	66.1523	13.964	0	174.121	0	4.16607	0.779343	15.0471	2.20052	0	53.7113	1.10651	0.280246	95.5496	0
NOCLEBFK_01448	0	0	0	0	0	0	0	0	0	0	0	0	0	0	0	0	0	0	0	0	0	0	0	0	0	0	0	0	0	0	0	0	0	0	0	0	0	0	0	0	0	0	0	0	0	0	0	0	0
NOCLEBFK_01449	177.463	65.6158	83.5019	169.109	69.1279	102.317	23.7924	11.0825	136.993	503.684	0.44717	0.323354	54.2785	16.9008	8.26538	1.16772	1.35785	0.630431	59.2133	145.782	106.082	53.7174	0.421051	59.9936	97.1576	4.69238	99.3645	1.18553	143.336	0.605263	0.314049	0	0.898407	39.0993	247.655	298.641	0.331903	0.537495	1.75309	0.398085	0.546109	1.15025	0.385492	0	2.663	0.290762	0.294566	0.211435	0.375763
NOCLEBFK_01450	85.6766	60.314	41.3575	13.1903	15.3215	47.4769	77.6084	63.5071	34.7307	93.6266	0.085802	0.124088	1219.6	0.231634	0.226562	0.044812	0.104216	16.1488	19.5916	17.7183	94.7059	29.0948	19.4704	15.7913	67.4747	25.1538	21.094	3.41214	21.5857	0.058068	0.180776	0	0.086192	35.1723	23.389	24.6566	0.063684	13.8714	0.840943	10.8464	0.052393	4.41413	1.55331	0	23.6067	15.7329	0.113041	0.121708	0.288401
NOCLEBFK_01451	18.1085	208.052	324.428	54.1308	62.317	29.8257	49.5945	124.768	1553.37	982.18	11495.8	105.85	0.182406	0.128806	208.506	643.002	1477.08	144.352	82.2951	7.71444	6.66548	69.8424	159.215	15.5926	13.4765	42.4315	23.3469	17.3296	74.5464	0.129161	0	1.19698	2.68403	67.1415	193.167	2.94034	2.83306	1.72049	49.7555	228.175	0.349612	51.4236	0.329049	1.14423	26.5952	0.24819	0.125718	1.08286	0.641489
NOCLEBFK_01452	399.901	6.45526	112.426	109.21	229.703	118.692	61.7299	95.681	121.29	183.824	0	0.331418	0.584064	0.206218	0	0.957474	0.556685	113.077	95.3143	137.335	2.11415	49.0944	41.8605	113.388	88.2394	24.548	0.451429	16.1	42.5643	0.310179	1.07294	0.684415	0.306937	65.8476	79.1848	109.398	0.226786	23.4132	30.3461	19.5846	86.1981	49.4171	82.0502	0.508862	35.0275	6.55629	18.6179	0.288944	129.148
NOCLEBFK_01453	124.923	318.877	99.0935	113.888	241.53	274.595	272.824	171.98	355.462	40.3315	0	0.248873	325.328	0.812996	0	0.179751	0.209018	88.4312	185.657	155.3	100.812	118.014	158.631	90.5738	359.041	124.373	80.6468	2.39521	51.2675	0	0.241712	6.01324	0	157.016	55.2508	10.7203	0.38318	128.761	7.75841	2.14474	38.144	4.09454	139.003	0.114637	0.512404	124.315	0	3.66151	106.285
NOCLEBFK_01454	132.443	158.578	189.537	147.49	255.303	200.981	412.817	278.622	177.715	107.544	1.65574	0.133031	123.259	0.124164	0.242891	0.288249	0.335181	133.055	129.457	141.131	164.269	138.381	150.533	152.364	60.6238	108.953	41.3146	265.819	31.1597	0.996049	0.129203	0.659341	0.369615	107.113	177.554	385.722	0.546194	16.6954	0.240414	89.9134	111.664	50.7536	729.065	57.4781	0.219118	97.8515	75.3787	802.279	0.463779
NOCLEBFK_01455	100.419	130.042	43.6796	0.378228	60.5033	3.67942	0.189718	211.769	206.235	0	0.246033	0.17791	3931.71	0	0.64966	0	0.149418	1.04059	40.5151	29.6192	14.1052	108.868	37.5293	0	0	2.58175	35.9138	0.16307	0.271475	0	12.7865	0	0	68.4602	15.8222	14.6678	0	17.4481	0	0	0.30047	0.316435	0	0	0.293037	0	0.16207	0.232663	0
NOCLEBFK_01456	34.6002	254.233	463.91	0	3.34884	0	0	257.937	0	4.44099	126.901	0	0	0	0	0	0.332189	0	0.928596	63.9271	246.907	0	0	0	0.330124	0.358737	0.323255	0	0	0	0.38415	0	0	0	0	71.8146	0	14.1356	0.357401	0	0	0	0	0	0	0	0	0.25863	0.459638
NOCLEBFK_01457	0	0	0	0	0	0	0	0	0	0	0	0	0	0	0	0	0	0.24398	0	0	0	0.175434	0	0	0	0	0	0	0	0	0	0	0	0	0	0	0	0	0	0	0	0	0	0	0	0	0	0	0
NOCLEBFK_01458	18.1702	1.44444	0	0.240867	0.319753	0.117158	0	25.1879	0	79.1246	0	0.113298	0	0	0	0	0	0	0	0.137681	0	0	19.9165	0	0	0	0.092595	0	0.086441	0.530186	0.330113	0.701919	0	0.161173	0	0	0	0	0	0.139482	0.669717	0	0	0.104375	0	0.101878	0	0	0.131661
[truncated: 3,784 more rows]
[truncated: 11 more columns]
