# Supplementary material for: Rationally-defined microbial consortia suppress multidrug-resistant proinflammatory Enterobacteriaceae via ecological control
Source: Research Square preprint supplement (doi:10.21203/rs.3.rs-3462622/v1), 2023-10-23
Supplement: Supplementary file 3 [file 386da256d724d4c973dee45b.xlsx]

## Sheet: MRM1
ID	Q1	Q3	DwellTime	DP	EP	CE	CXP
Galacturonate	192.9	59	30	-50	-10	-31	-26
Glucoronate	192.9	112.9	30	-50	-10	-16	-2
Gluconate	194.936	74.9	30	-40	-10	-24	-11

## Sheet: MRM2
ID	Q1	Q3	DwellTime	DP	EP	CE	CXP
D-Ribose	194.881	149.1	30	-5	-10	-10	-11
L-Rhamnose	208.945	163.1	30	-20	-10	-10	-13
L-Fucose	208.945	163.1	30	-20	-10	-10	-13
L-Arabinose	194.881	149.1	30	-5	-10	-10	-11
D-Xylose	194.881	149.1	30	-5	-10	-10	-11
D-Fructose	224.917	178.8	30	-25	-10	-10	-11
Sorbitol	226.919	180.9	30	-5	-10	-14	-9
D-Galactose	224.917	178.8	30	-25	-10	-10	-11
D-Mannose	224.917	178.8	30	-25	-10	-10	-11
D-Mannitol	226.919	180.9	30	-5	-10	-14	-9
D-Glucose	224.917	178.8	30	-25	-10	-10	-11
Sucrose	386.946	341	30	-35	-10	-18	-17
Lactose	386.922	161	30	-35	-10	-18	-13
Cellobiose	386.922	161	30	-35	-10	-18	-13
D-Maltose	386.922	161	30	-35	-10	-18	-13
Trehalose	386.946	341	30	-35	-10	-18	-17
N-acetylglucosamine	222.052	204.1	30	61	10	11	6
