# Supplementary material for: Rationally-defined microbial consortia suppress multidrug-resistant proinflammatory Enterobacteriaceae via ecological control
Source: Research Square preprint supplement (doi:10.21203/rs.3.rs-3462622/v1), 2023-10-23
Supplement: Supplementary file 4 [file 5f6cc1ad5049b1a3904f33a0.xlsx]

## Sheet: F
*1) new_taxdmp files were downloaded on September 14th 2023 from NCBI Taxonomy's FTP site(https://ftp.ncbi.nlm.nih.gov/pub/taxonomy/new_taxdump/)
*2) Taxonomy information of f07 was not determined at species level by GTDB-tk. pplacer taxonomy was described in the table. Additionally, the information regarding related reference genome of f07 was listed at the bottom of this sheet.
*3) GCF_003471165.1 is suppressed from RefSeq. The NBCI taxonomy name was obtained from the genome information of GCA_003471165.1.
	NCBI taxonomy of ANI reference genome *1											GTDB-tk
strain_id	assembly_accession	tax_id	tax_name	superkingdom	kingdom	phylum	class	order	family	genus	species	fastani_reference	gtdb_classification	fastani_ani	fastani_af
f01	GCF_000196555.1	565042	Bifidobacterium longum subsp. longum JCM 1217	Bacteria		Actinomycetota	Actinomycetes	Bifidobacteriales	Bifidobacteriaceae	Bifidobacterium	Bifidobacterium longum	GCF_000196555.1	d__Bacteria;p__Actinomycetota;c__Actinomycetia;o__Actinomycetales;f__Bifidobacteriaceae;g__Bifidobacterium;s__Bifidobacterium longum	98.7	0.842
f02	GCF_000210075.1	657309	Bacteroides xylanisolvens XB1A	Bacteria		Bacteroidota	Bacteroidia	Bacteroidales	Bacteroidaceae	Bacteroides	Bacteroides xylanisolvens	GCF_000210075.1	d__Bacteria;p__Bacteroidota;c__Bacteroidia;o__Bacteroidales;f__Bacteroidaceae;g__Bacteroides;s__Bacteroides xylanisolvens	97.04	0.747
f03	GCF_002849695.1	817	Bacteroides fragilis	Bacteria		Bacteroidota	Bacteroidia	Bacteroidales	Bacteroidaceae	Bacteroides	Bacteroides fragilis	GCF_002849695.1	d__Bacteria;p__Bacteroidota;c__Bacteroidia;o__Bacteroidales;f__Bacteroidaceae;g__Bacteroides;s__Bacteroides fragilis_A	98.01	0.821
f04	GCA_025147485.1	820	Bacteroides uniformis	Bacteria		Bacteroidota	Bacteroidia	Bacteroidales	Bacteroidaceae	Bacteroides	Bacteroides uniformis	GCA_025147485.1	d__Bacteria;p__Bacteroidota;c__Bacteroidia;o__Bacteroidales;f__Bacteroidaceae;g__Bacteroides;s__Bacteroides uniformis	98.31	0.804
f05	GCF_000011065.1	226186	Bacteroides thetaiotaomicron VPI-5482	Bacteria		Bacteroidota	Bacteroidia	Bacteroidales	Bacteroidaceae	Bacteroides	Bacteroides thetaiotaomicron	GCF_000011065.1	d__Bacteria;p__Bacteroidota;c__Bacteroidia;o__Bacteroidales;f__Bacteroidaceae;g__Bacteroides;s__Bacteroides thetaiotaomicron	98.89	0.876
f07 *2				Bacteria		Bacteroidota	Bacteroidia	Bacteroidales	Bacteroidaceae	Bacteroides			d__Bacteria;p__Bacteroidota;c__Bacteroidia;o__Bacteroidales;f__Bacteroidaceae;g__Bacteroides; s__
f09	GCF_000969835.1	927665	Parabacteroides goldsteinii DSM 19448 = WAL 12034	Bacteria		Bacteroidota	Bacteroidia	Bacteroidales	Tannerellaceae	Parabacteroides	Parabacteroides goldsteinii	GCF_000969835.1	d__Bacteria;p__Bacteroidota;c__Bacteroidia;o__Bacteroidales;f__Tannerellaceae;g__Parabacteroides;s__Parabacteroides goldsteinii	98.24	0.866
f10	GCF_008121495.1	411470	[Ruminococcus] gnavus ATCC 29149	Bacteria		Bacillota	Clostridia	Eubacteriales	Lachnospiraceae	Mediterraneibacter	[Ruminococcus] gnavus	GCF_008121495.1	d__Bacteria;p__Bacillota_A;c__Clostridia;o__Lachnospirales;f__Lachnospiraceae;g__Ruminococcus_B;s__Ruminococcus_B gnavus	98.77	0.824
f11	GCA_003471165.1 *3)	2292074	Ruminococcus sp. AM22-13	Bacteria		Bacillota	Clostridia	Eubacteriales	Oscillospiraceae	Ruminococcus	Ruminococcus sp. AM22-13	GCF_003471165.1	d__Bacteria;p__Bacillota_A;c__Clostridia;o__Lachnospirales;f__Lachnospiraceae;g__Blautia_A;s__Blautia_A sp003471165	98.33	0.847
f12	GCF_004346095.1	1912855	Faecalimonas umbilicata	Bacteria		Bacillota	Clostridia	Eubacteriales	Lachnospiraceae	Faecalimonas	Faecalimonas umbilicata	GCF_004346095.1	d__Bacteria;p__Bacillota_A;c__Clostridia;o__Lachnospirales;f__Lachnospiraceae;g__Faecalimonas;s__Faecalimonas umbilicata	97.91	0.792
f13	GCF_013282095.1	2547410	Enterocloster alcoholdehydrogenati	Bacteria		Bacillota	Clostridia	Eubacteriales	Lachnospiraceae	Enterocloster	Enterocloster alcoholdehydrogenati	GCF_013282095.1	d__Bacteria;p__Bacillota_A;c__Clostridia;o__Lachnospirales;f__Lachnospiraceae;g__Enterocloster;s__Enterocloster sp900538485	98.79	0.857
f14	GCF_900104635.1	1870993	Coprococcus phoceensis	Bacteria		Bacillota	Clostridia	Eubacteriales	Lachnospiraceae	Coprococcus	Coprococcus phoceensis	GCF_900104635.1	d__Bacteria;p__Bacillota_A;c__Clostridia;o__Lachnospirales;f__Lachnospiraceae;g__Faecalimonas;s__Faecalimonas phoceensis	98.47	0.72
f16	GCF_000332875.2	649757	Anaerostipes hadrus ATCC 29173 = JCM 17467	Bacteria		Bacillota	Clostridia	Eubacteriales	Lachnospiraceae	Anaerostipes	Anaerostipes hadrus	GCF_000332875.2	d__Bacteria;p__Bacillota_A;c__Clostridia;o__Lachnospirales;f__Lachnospiraceae;g__Anaerostipes;s__Anaerostipes hadrus	98.1	0.87
f17	GCF_024622975.1	1796615	Blautia caecimuris	Bacteria		Bacillota	Clostridia	Eubacteriales	Lachnospiraceae	Blautia	Blautia caecimuris	GCF_024622975.1	d__Bacteria;p__Bacillota_A;c__Clostridia;o__Lachnospirales;f__Lachnospiraceae;g__Blautia_A;s__Blautia_A caecimuris	96.62	0.759
f18	GCF_002234575.2	208479	Enterocloster bolteae	Bacteria		Bacillota	Clostridia	Eubacteriales	Lachnospiraceae	Enterocloster	Enterocloster bolteae	GCF_002234575.2	d__Bacteria;p__Bacillota_A;c__Clostridia;o__Lachnospirales;f__Lachnospiraceae;g__Enterocloster;s__Enterocloster bolteae	97.35	0.838
f19	GCF_024622975.1	1796615	Blautia caecimuris	Bacteria		Bacillota	Clostridia	Eubacteriales	Lachnospiraceae	Blautia	Blautia caecimuris	GCF_024622975.1	d__Bacteria;p__Bacillota_A;c__Clostridia;o__Lachnospirales;f__Lachnospiraceae;g__Blautia_A;s__Blautia_A caecimuris	99.25	0.873
f20	GCF_012317185.1	1522	[Clostridium] innocuum	Bacteria		Bacillota	Erysipelotrichia	Erysipelotrichales	Coprobacillaceae	Thomasclavelia	[Clostridium] innocuum	GCF_012317185.1	d__Bacteria;p__Bacillota;c__Bacilli;o__Erysipelotrichales;f__Erysipelotrichaceae;g__Clostridium_AQ;s__Clostridium_AQ innocuum	97.4	0.872
f21	GCF_020215665.1	2877527	Blautia sp. NBRC 113351	Bacteria		Bacillota	Clostridia	Eubacteriales	Lachnospiraceae	Blautia	Blautia sp. NBRC 113351	GCF_020215665.1	d__Bacteria;p__Bacillota_A;c__Clostridia;o__Lachnospirales;f__Lachnospiraceae;g__Blautia;s__Blautia sp001304935	99.6	0.937
f22	GCA_025149125.1	518636	[Clostridium] asparagiforme DSM 15981	Bacteria		Bacillota	Clostridia	Eubacteriales	Lachnospiraceae	Enterocloster	Enterocloster asparagiformis	GCA_025149125.1	d__Bacteria;p__Bacillota_A;c__Clostridia;o__Lachnospirales;f__Lachnospiraceae;g__Enterocloster;s__Enterocloster asparagiformis	98.7	0.891
f23	GCF_015560805.1	342942	Mediterraneibacter glycyrrhizinilyticus	Bacteria		Bacillota	Clostridia	Eubacteriales	Lachnospiraceae	Mediterraneibacter	Mediterraneibacter glycyrrhizinilyticus	GCF_015560805.1	d__Bacteria;p__Bacillota_A;c__Clostridia;o__Lachnospirales;f__Lachnospiraceae;g__Schaedlerella;s__Schaedlerella glycyrrhizinilytica_A	98.44	0.913
f24	GCF_001881565.1	1432052	Eisenbergiella tayi	Bacteria		Bacillota	Clostridia	Eubacteriales	Lachnospiraceae	Eisenbergiella	Eisenbergiella tayi	GCF_001881565.1	d__Bacteria;p__Bacillota_A;c__Clostridia;o__Lachnospirales;f__Lachnospiraceae;g__Eisenbergiella;s__Eisenbergiella tayi	97.89	0.87
f26	GCF_000239295.1	411475	Flavonifractor plautii ATCC 29863	Bacteria		Bacillota	Clostridia	Eubacteriales	Oscillospiraceae	Flavonifractor	Flavonifractor plautii	GCF_000239295.1	d__Bacteria;p__Bacillota_A;c__Clostridia;o__Oscillospirales;f__Oscillospiraceae;g__Flavonifractor;s__Flavonifractor plautii	98.18	0.874
f28	GCA_025148965.1	261299	Intestinibacter bartlettii	Bacteria		Bacillota	Clostridia	Eubacteriales	Peptostreptococcaceae	Intestinibacter	Intestinibacter bartlettii	GCA_025148965.1	d__Bacteria;p__Bacillota_A;c__Clostridia;o__Peptostreptococcales;f__Peptostreptococcaceae;g__Intestinibacter;s__Intestinibacter bartlettii	98.25	0.93
f29	GCF_008121495.1	411470	[Ruminococcus] gnavus ATCC 29149	Bacteria		Bacillota	Clostridia	Eubacteriales	Lachnospiraceae	Mediterraneibacter	[Ruminococcus] gnavus	GCF_008121495.1	d__Bacteria;p__Bacillota_A;c__Clostridia;o__Lachnospirales;f__Lachnospiraceae;g__Ruminococcus_B;s__Ruminococcus_B gnavus	97.66	0.753
f30	GCF_002160865.1	1776392	Massilimicrobiota timonensis	Bacteria		Bacillota	Erysipelotrichia	Erysipelotrichales	Erysipelotrichaceae	Massilimicrobiota	Massilimicrobiota timonensis	GCF_002160865.1	d__Bacteria;p__Bacillota;c__Bacilli;o__Erysipelotrichales;f__Coprobacillaceae;g__Massilimicrobiota;s__Massilimicrobiota sp002160865	98.35	0.838
f31	GCF_002270485.1	2025494	Anaerostipes hominis (ex Lee et al. 2021)	Bacteria		Bacillota	Clostridia	Eubacteriales	Lachnospiraceae	Anaerostipes	Anaerostipes hominis (ex Lee et al. 2021)	GCF_002270485.1	d__Bacteria;p__Bacillota_A;c__Clostridia;o__Lachnospirales;f__Lachnospiraceae;g__Anaerostipes;s__Anaerostipes hominis	99.95	0.996
f32	GCF_900461125.1	1532	Blautia coccoides	Bacteria		Bacillota	Clostridia	Eubacteriales	Lachnospiraceae	Blautia	Blautia coccoides	GCF_900461125.1	d__Bacteria;p__Bacillota_A;c__Clostridia;o__Lachnospirales;f__Lachnospiraceae;g__Blautia;s__Blautia coccoides	98.04	0.782
f33	GCF_014131695.1	445974	Thomasclavelia ramosa DSM 1402	Bacteria		Bacillota	Erysipelotrichia	Erysipelotrichales	Coprobacillaceae	Thomasclavelia	Thomasclavelia ramosa	GCF_014131695.1	d__Bacteria;p__Bacillota;c__Bacilli;o__Erysipelotrichales;f__Coprobacillaceae;g__Thomasclavelia;s__Thomasclavelia ramosa	99.64	0.962
f34	GCF_902810435.1	29466	Veillonella parvula	Bacteria		Bacillota	Negativicutes	Veillonellales	Veillonellaceae	Veillonella	Veillonella parvula	GCF_902810435.1	d__Bacteria;p__Bacillota_C;c__Negativicutes;o__Veillonellales;f__Veillonellaceae;g__Veillonella;s__Veillonella parvula_A	96.02	0.888
f35	GCF_003019675.1	861	Fusobacterium ulcerans	Bacteria		Fusobacteriota	Fusobacteriia	Fusobacteriales	Fusobacteriaceae	Fusobacterium	Fusobacterium ulcerans	GCF_003019675.1	d__Bacteria;p__Fusobacteriota;c__Fusobacteriia;o__Fusobacteriales;f__Fusobacteriaceae;g__Fusobacterium_A;s__Fusobacterium_A ulcerans	98.57	0.908
f37	GCF_003697165.2	866789	Escherichia coli DSM 30083 = JCM 1649 = ATCC 11775	Bacteria		Pseudomonadota	Gammaproteobacteria	Enterobacterales	Enterobacteriaceae	Escherichia	Escherichia coli	GCF_003697165.2	d__Bacteria;p__Pseudomonadota;c__Gammaproteobacteria;o__Enterobacterales;f__Enterobacteriaceae;g__Escherichia;s__Escherichia coli	98.42	0.887
	NCBI taxonomy of related reference genome											GTDB-tk
strain_id	assembly_accession	tax_id	tax_name	superkingdom	kingdom	phylum	class	order	family	genus	species	other related reference	gtdb_classification of other related reference	fastani_ani	fastani_af
f07 *2	GCF_903181435.1	85831	Bacteroides acidifaciens	Bacteria		Bacteroidota	Bacteroidia	Bacteroidales	Bacteroidaceae	Bacteroides	Bacteroides acidifaciens	GCF_903181435.1	d__Bacteria;p__Bacteroidota;c__Bacteroidia;o__Bacteroidales;f__Bacteroidaceae;g__Bacteroides; s__Bacteroides sp900765785	90.96	0.703

## Sheet: I
*1) new_taxdmp files were downloaded on September 14th 2023 from NCBI Taxonomy's FTP site(https://ftp.ncbi.nlm.nih.gov/pub/taxonomy/new_taxdump/)
	NCBI taxonomy of ANI reference genome *1											GTDB-tk
strain_id	assembly_accession	tax_id	tax_name	superkingdom	kingdom	phylum	class	order	family	genus	species	fastani_reference	gtdb_classification	fastani_ani	fastani_af
i01	GCF_000010425.1	367928	Bifidobacterium adolescentis ATCC 15703	Bacteria		Actinomycetota	Actinomycetes	Bifidobacteriales	Bifidobacteriaceae	Bifidobacterium	Bifidobacterium adolescentis	GCF_000010425.1	d__Bacteria;p__Actinomycetota;c__Actinomycetia;o__Actinomycetales;f__Bifidobacteriaceae;g__Bifidobacterium;s__Bifidobacterium adolescentis	97.75	0.881
i02	GCF_001025215.1	547043	Bifidobacterium pseudocatenulatum DSM 20438 = JCM 1200 = LMG 10505	Bacteria		Actinomycetota	Actinomycetes	Bifidobacteriales	Bifidobacteriaceae	Bifidobacterium	Bifidobacterium pseudocatenulatum	GCF_001025215.1	d__Bacteria;p__Actinomycetota;c__Actinomycetia;o__Actinomycetales;f__Bifidobacteriaceae;g__Bifidobacterium;s__Bifidobacterium pseudocatenulatum	98.03	0.9
i03	GCF_001025135.1	500634	Bifidobacterium bifidum ATCC 29521 = JCM 1255 = DSM 20456	Bacteria		Actinomycetota	Actinomycetes	Bifidobacteriales	Bifidobacteriaceae	Bifidobacterium	Bifidobacterium bifidum	GCF_001025135.1	d__Bacteria;p__Actinomycetota;c__Actinomycetia;o__Actinomycetales;f__Bifidobacteriaceae;g__Bifidobacterium;s__Bifidobacterium bifidum	99.06	0.943
i04	GCF_000196555.1	565042	Bifidobacterium longum subsp. longum JCM 1217	Bacteria		Actinomycetota	Actinomycetes	Bifidobacteriales	Bifidobacteriaceae	Bifidobacterium	Bifidobacterium longum	GCF_000196555.1	d__Bacteria;p__Actinomycetota;c__Actinomycetia;o__Actinomycetales;f__Bifidobacteriaceae;g__Bifidobacterium;s__Bifidobacterium longum	98.55	0.833
i05	GCA_019414645.1	1965294	Collinsella sp.	Bacteria		Actinomycetota	Coriobacteriia	Coriobacteriales	Coriobacteriaceae	Collinsella	Collinsella sp.	GCA_019414645.1	d__Bacteria;p__Actinomycetota;c__Coriobacteriia;o__Coriobacteriales;f__Coriobacteriaceae;g__Collinsella;s__Collinsella sp019414645	96.18	0.926
i06	GCA_900541695.1	165190	uncultured Collinsella sp.	Bacteria		Actinomycetota	Coriobacteriia	Coriobacteriales	Coriobacteriaceae	Collinsella	uncultured Collinsella sp.	GCA_900541695.1	d__Bacteria;p__Actinomycetota;c__Coriobacteriia;o__Coriobacteriales;f__Coriobacteriaceae;g__Collinsella;s__Collinsella sp900541695	95.76	0.937
i07	GCF_000196555.1	565042	Bifidobacterium longum subsp. longum JCM 1217	Bacteria		Actinomycetota	Actinomycetes	Bifidobacteriales	Bifidobacteriaceae	Bifidobacterium	Bifidobacterium longum	GCF_000196555.1	d__Bacteria;p__Actinomycetota;c__Actinomycetia;o__Actinomycetales;f__Bifidobacteriaceae;g__Bifidobacterium;s__Bifidobacterium longum	98.52	0.836
i08	GCA_025147325.1	449673	Bacteroides stercoris ATCC 43183	Bacteria		Bacteroidota	Bacteroidia	Bacteroidales	Bacteroidaceae	Bacteroides	Bacteroides stercoris	GCA_025147325.1	d__Bacteria;p__Bacteroidota;c__Bacteroidia;o__Bacteroidales;f__Bacteroidaceae;g__Bacteroides;s__Bacteroides stercoris	98.4	0.766
i09	GCF_000382445.1	1121098	Phocaeicola massiliensis B84634 = Timone 84634 = DSM 17679 = JCM 13223	Bacteria		Bacteroidota	Bacteroidia	Bacteroidales	Bacteroidaceae	Phocaeicola	Phocaeicola massiliensis	GCF_000382445.1	d__Bacteria;p__Bacteroidota;c__Bacteroidia;o__Bacteroidales;f__Bacteroidaceae;g__Phocaeicola;s__Phocaeicola massiliensis	98.47	0.817
i10	GCF_000012825.1	435590	Phocaeicola vulgatus ATCC 8482	Bacteria		Bacteroidota	Bacteroidia	Bacteroidales	Bacteroidaceae	Phocaeicola	Phocaeicola vulgatus	GCF_000012825.1	d__Bacteria;p__Bacteroidota;c__Bacteroidia;o__Bacteroidales;f__Bacteroidaceae;g__Phocaeicola;s__Phocaeicola vulgatus	99.02	0.795
i11	GCF_013009555.1	357276	Phocaeicola dorei	Bacteria		Bacteroidota	Bacteroidia	Bacteroidales	Bacteroidaceae	Phocaeicola	Phocaeicola dorei	GCF_013009555.1	d__Bacteria;p__Bacteroidota;c__Bacteroidia;o__Bacteroidales;f__Bacteroidaceae;g__Phocaeicola;s__Phocaeicola dorei	98.8	0.815
i12	GCA_025151215.1	411477	Parabacteroides merdae ATCC 43184	Bacteria		Bacteroidota	Bacteroidia	Bacteroidales	Tannerellaceae	Parabacteroides	Parabacteroides merdae	GCA_025151215.1	d__Bacteria;p__Bacteroidota;c__Bacteroidia;o__Bacteroidales;f__Tannerellaceae;g__Parabacteroides;s__Parabacteroides merdae	99.84	0.942
i13	GCF_000012845.1	435591	Parabacteroides distasonis ATCC 8503	Bacteria		Bacteroidota	Bacteroidia	Bacteroidales	Tannerellaceae	Parabacteroides	Parabacteroides distasonis	GCF_000012845.1	d__Bacteria;p__Bacteroidota;c__Bacteroidia;o__Bacteroidales;f__Tannerellaceae;g__Parabacteroides;s__Parabacteroides distasonis	97.1	0.834
i15	GCF_000154465.1	445970	Alistipes putredinis DSM 17216	Bacteria		Bacteroidota	Bacteroidia	Bacteroidales	Rikenellaceae	Alistipes	Alistipes putredinis	GCF_000154465.1	d__Bacteria;p__Bacteroidota;c__Bacteroidia;o__Bacteroidales;f__Rikenellaceae;g__Alistipes;s__Alistipes putredinis	98.99	0.851
i16	GCA_025147485.1	820	Bacteroides uniformis	Bacteria		Bacteroidota	Bacteroidia	Bacteroidales	Bacteroidaceae	Bacteroides	Bacteroides uniformis	GCA_025147485.1	d__Bacteria;p__Bacteroidota;c__Bacteroidia;o__Bacteroidales;f__Bacteroidaceae;g__Bacteroides;s__Bacteroides uniformis	95.86	0.7
i17	GCF_001314995.1	28116	Bacteroides ovatus	Bacteria		Bacteroidota	Bacteroidia	Bacteroidales	Bacteroidaceae	Bacteroides	Bacteroides ovatus	GCF_001314995.1	d__Bacteria;p__Bacteroidota;c__Bacteroidia;o__Bacteroidales;f__Bacteroidaceae;g__Bacteroides;s__Bacteroides ovatus	98.69	0.863
i18	GCA_900541585.1	538949	uncultured Alistipes sp.	Bacteria		Bacteroidota	Bacteroidia	Bacteroidales	Rikenellaceae	Alistipes	uncultured Alistipes sp.	GCA_900541585.1	d__Bacteria;p__Bacteroidota;c__Bacteroidia;o__Bacteroidales;f__Rikenellaceae;g__Alistipes;s__Alistipes sp900541585	98.77	0.92
i19	GCF_000190535.1	709991	Odoribacter splanchnicus DSM 20712	Bacteria		Bacteroidota	Bacteroidia	Bacteroidales	Odoribacteraceae	Odoribacter	Odoribacter splanchnicus	GCF_000190535.1	d__Bacteria;p__Bacteroidota;c__Bacteroidia;o__Bacteroidales;f__Marinifilaceae;g__Odoribacter;s__Odoribacter splanchnicus	98.41	0.786
i20	GCF_023347255.1	2929495	Faecalibacterium sp. I4-3-84	Bacteria		Bacillota	Clostridia	Eubacteriales	Oscillospiraceae	Faecalibacterium	Faecalibacterium sp. I4-3-84	GCF_023347255.1	d__Bacteria;p__Bacillota_A;c__Clostridia;o__Oscillospirales;f__Ruminococcaceae;g__Faecalibacterium;s__Faecalibacterium prausnitzii_D	96.69	0.765
i21	GCF_023347255.1	2929495	Faecalibacterium sp. I4-3-84	Bacteria		Bacillota	Clostridia	Eubacteriales	Oscillospiraceae	Faecalibacterium	Faecalibacterium sp. I4-3-84	GCF_023347255.1	d__Bacteria;p__Bacillota_A;c__Clostridia;o__Oscillospirales;f__Ruminococcaceae;g__Faecalibacterium;s__Faecalibacterium prausnitzii_D	96.7	0.779
i22	GCA_025148125.1	1121115	Blautia wexlerae DSM 19850	Bacteria		Bacillota	Clostridia	Eubacteriales	Lachnospiraceae	Blautia	Blautia wexlerae	GCA_025148125.1	d__Bacteria;p__Bacillota_A;c__Clostridia;o__Lachnospirales;f__Lachnospiraceae;g__Blautia_A;s__Blautia_A wexlerae	97.66	0.763
i23	GCA_003480425.1	2292892	Firmicutes bacterium AM31-12AC	Bacteria		Bacillota					Firmicutes bacterium AM31-12AC	GCA_003480425.1	d__Bacteria;p__Bacillota_A;c__Clostridia;o__Lachnospirales;f__Lachnospiraceae;g__Schaedlerella;s__Schaedlerella sp900066545	97.18	0.708
i24	GCF_000723465.1	1160721	Ruminococcus bicirculans (ex Wegman et al. 2014)	Bacteria		Bacillota	Clostridia	Eubacteriales	Oscillospiraceae	Ruminococcus	Ruminococcus bicirculans (ex Wegman et al. 2014)	GCF_000723465.1	d__Bacteria;p__Bacillota_A;c__Clostridia;o__Oscillospirales;f__Ruminococcaceae;g__Ruminococcus_D;s__Ruminococcus_D bicirculans	97.6	0.84
i25	GCF_023347255.1	2929495	Faecalibacterium sp. I4-3-84	Bacteria		Bacillota	Clostridia	Eubacteriales	Oscillospiraceae	Faecalibacterium	Faecalibacterium sp. I4-3-84	GCF_023347255.1	d__Bacteria;p__Bacillota_A;c__Clostridia;o__Oscillospirales;f__Ruminococcaceae;g__Faecalibacterium;s__Faecalibacterium prausnitzii_D	96.91	0.803
i26	GCF_024168045.1	88431	Dorea longicatena	Bacteria		Bacillota	Clostridia	Eubacteriales	Lachnospiraceae	Dorea	Dorea longicatena	GCF_024168045.1	d__Bacteria;p__Bacillota_A;c__Clostridia;o__Lachnospirales;f__Lachnospiraceae;g__Dorea_A;s__Dorea_A longicatena_B	97.41	0.794
i27	GCA_025150245.1	39486	Dorea formicigenerans	Bacteria		Bacillota	Clostridia	Eubacteriales	Lachnospiraceae	Dorea	Dorea formicigenerans	GCA_025150245.1	d__Bacteria;p__Bacillota_A;c__Clostridia;o__Lachnospirales;f__Lachnospiraceae;g__Dorea;s__Dorea formicigenerans	97.38	0.792
i28	GCF_000332875.2	649757	Anaerostipes hadrus ATCC 29173 = JCM 17467	Bacteria		Bacillota	Clostridia	Eubacteriales	Lachnospiraceae	Anaerostipes	Anaerostipes hadrus	GCF_000332875.2	d__Bacteria;p__Bacillota_A;c__Clostridia;o__Lachnospirales;f__Lachnospiraceae;g__Anaerostipes;s__Anaerostipes hadrus	98.2	0.878
i29	GCA_025148965.1	261299	Intestinibacter bartlettii	Bacteria		Bacillota	Clostridia	Eubacteriales	Peptostreptococcaceae	Intestinibacter	Intestinibacter bartlettii	GCA_025148965.1	d__Bacteria;p__Bacillota_A;c__Clostridia;o__Peptostreptococcales;f__Peptostreptococcaceae;g__Intestinibacter;s__Intestinibacter bartlettii	98.24	0.928
i30	GCF_000239295.1	411475	Flavonifractor plautii ATCC 29863	Bacteria		Bacillota	Clostridia	Eubacteriales	Oscillospiraceae	Flavonifractor	Flavonifractor plautii	GCF_000239295.1	d__Bacteria;p__Bacillota_A;c__Clostridia;o__Oscillospirales;f__Oscillospiraceae;g__Flavonifractor;s__Flavonifractor plautii	98.22	0.866
i31	GCA_003112755.1	2108523	Lawsonibacter asaccharolyticus	Bacteria		Bacillota	Clostridia	Eubacteriales	Oscillospiraceae	Lawsonibacter	Lawsonibacter asaccharolyticus	GCA_003112755.1	d__Bacteria;p__Bacillota_A;c__Clostridia;o__Oscillospirales;f__Oscillospiraceae;g__Lawsonibacter;s__Lawsonibacter asaccharolyticus	98.89	0.789
i32	GCF_003024685.1	1982626	Faecalibacillus intestinalis	Bacteria		Bacillota	Erysipelotrichia	Erysipelotrichales	Erysipelotrichaceae	Faecalibacillus	Faecalibacillus intestinalis	GCF_003024685.1	d__Bacteria;p__Bacillota;c__Bacilli;o__Erysipelotrichales;f__Coprobacillaceae;g__Faecalibacillus;s__Faecalibacillus intestinalis	98.5	0.864
i33	GCF_003010495.1	1064535	Megasphaera elsdenii DSM 20460	Bacteria		Bacillota	Negativicutes	Veillonellales	Veillonellaceae	Megasphaera	Megasphaera elsdenii	GCF_003010495.1	d__Bacteria;p__Bacillota_C;c__Negativicutes;o__Veillonellales;f__Megasphaeraceae;g__Megasphaera;s__Megasphaera elsdenii	98.21	0.873
i34	GCA_000434475.1	1262870	Dialister sp. CAG:486	Bacteria		Bacillota	Negativicutes	Veillonellales	Veillonellaceae	Dialister	Dialister sp. CAG:486	GCA_000434475.1	d__Bacteria;p__Bacillota_C;c__Negativicutes;o__Veillonellales;f__Dialisteraceae;g__Dialister;s__Dialister sp000434475	96.6	0.889
i35	GCF_000425045.1	1120921	Acidaminococcus intestini DSM 21505	Bacteria		Bacillota	Negativicutes	Acidaminococcales	Acidaminococcaceae	Acidaminococcus	Acidaminococcus intestini	GCF_000425045.1	d__Bacteria;p__Bacillota_C;c__Negativicutes;o__Acidaminococcales;f__Acidaminococcaceae;g__Acidaminococcus;s__Acidaminococcus intestini	99.08	0.9
i37	GCF_000455225.1	1232428	Megasphaera massiliensis	Bacteria		Bacillota	Negativicutes	Veillonellales	Veillonellaceae	Megasphaera	Megasphaera massiliensis	GCF_000455225.1	d__Bacteria;p__Bacillota_C;c__Negativicutes;o__Veillonellales;f__Megasphaeraceae;g__Megasphaera;s__Megasphaera massiliensis	95.99	0.826
i38	GCF_003315195.1	40545	Sutterella wadsworthensis	Bacteria		Pseudomonadota	Betaproteobacteria	Burkholderiales	Sutterellaceae	Sutterella	Sutterella wadsworthensis	GCF_003315195.1	d__Bacteria;p__Pseudomonadota;c__Gammaproteobacteria;o__Burkholderiales;f__Burkholderiaceae_A;g__Sutterella;s__Sutterella wadsworthensis	97.61	0.909
i39	GCF_900461085.1	1561	Clostridium baratii	Bacteria		Bacillota	Clostridia	Eubacteriales	Clostridiaceae	Clostridium	Clostridium baratii	GCF_900461085.1	d__Bacteria;p__Bacillota_A;c__Clostridia;o__Clostridiales;f__Clostridiaceae;g__Clostridium;s__Clostridium baratii	98.76	0.941
i40	GCA_001305115.1	1697793	Clostridia bacterium UC5.1-1E11	Bacteria		Bacillota	Clostridia				Clostridia bacterium UC5.1-1E11	GCA_001305115.1	d__Bacteria;p__Bacillota_A;c__Clostridia;o__Oscillospirales;f__Acutalibacteraceae;g__Anaeromassilibacillus;s__Anaeromassilibacillus sp001305115	99.93	0.991
i41	GCA_902362775.1	1898207	Clostridiales bacterium	Bacteria		Bacillota	Clostridia	Eubacteriales			Clostridiales bacterium	GCA_902362775.1	d__Bacteria;p__Bacillota_A;c__Clostridia;o__Oscillospirales;f__Oscillospiraceae;g__Lawsonibacter;s__Lawsonibacter sp900066645	98.54	0.788
i42	GCF_014982855.1	2779352	Pseudoflavonifractor gallinarum	Bacteria		Bacillota	Clostridia	Eubacteriales	Oscillospiraceae	Pseudoflavonifractor	Pseudoflavonifractor gallinarum	GCF_014982855.1	d__Bacteria;p__Bacillota_A;c__Clostridia;o__Oscillospirales;f__Oscillospiraceae;g__Pseudoflavonifractor_A;s__Pseudoflavonifractor_A gallinarum	98.54	0.902
i43	GCF_015140235.1	2780922	Solibaculum mannosilyticum	Bacteria		Bacillota	Clostridia	Eubacteriales	Oscillospiraceae	Solibaculum	Solibaculum mannosilyticum	GCF_015140235.1	d__Bacteria;p__Bacillota_A;c__Clostridia;o__Oscillospirales;f__Acutalibacteraceae;g__Solibaculum;s__Solibaculum mannosilyticum	98.61	0.87

## Sheet: K
*1) new_taxdmp files were downloaded on September 14th 2023 from NCBI Taxonomy's FTP site(https://ftp.ncbi.nlm.nih.gov/pub/taxonomy/new_taxdump/)
	NCBI taxonomy of ANI reference genome *1											GTDB-tk
strain_id	assembly_accession	tax_id	tax_name	superkingdom	kingdom	phylum	class	order	family	genus	species	fastani_reference	gtdb_classification	fastani_ani	fastani_af
k01	GCF_001280875.1	1653434	Sellimonas intestinalis	Bacteria		Bacillota	Clostridia	Eubacteriales	Lachnospiraceae	Sellimonas	Sellimonas intestinalis	GCF_001280875.1	d__Bacteria;p__Bacillota_A;c__Clostridia;o__Lachnospirales;f__Lachnospiraceae;g__Sellimonas;s__Sellimonas intestinalis	99.05	0.879
k02	GCF_001314995.1	28116	Bacteroides ovatus	Bacteria		Bacteroidota	Bacteroidia	Bacteroidales	Bacteroidaceae	Bacteroides	Bacteroides ovatus	GCF_001314995.1	d__Bacteria;p__Bacteroidota;c__Bacteroidia;o__Bacteroidales;f__Bacteroidaceae;g__Bacteroides;s__Bacteroides ovatus	96.96	0.777
k03	GCF_900461125.1	1532	Blautia coccoides	Bacteria		Bacillota	Clostridia	Eubacteriales	Lachnospiraceae	Blautia	Blautia coccoides	GCF_900461125.1	d__Bacteria;p__Bacillota_A;c__Clostridia;o__Lachnospirales;f__Lachnospiraceae;g__Blautia;s__Blautia coccoides	99.83	0.961
k04	GCA_002270465.1	2025493	Blautia hominis	Bacteria		Bacillota	Clostridia	Eubacteriales	Lachnospiraceae	Blautia	Blautia hominis	GCA_002270465.1	d__Bacteria;p__Bacillota_A;c__Clostridia;o__Lachnospirales;f__Lachnospiraceae;g__Blautia;s__Blautia hominis	98.53	0.863
k05	GCF_000701705.1	1408428	Bilophila wadsworthia ATCC 49260	Bacteria		Thermodesulfobacteriota	Desulfovibrionia	Desulfovibrionales	Desulfovibrionaceae	Bilophila	Bilophila wadsworthia	GCF_000701705.1	d__Bacteria;p__Desulfobacterota;c__Desulfovibrionia;o__Desulfovibrionales;f__Desulfovibrionaceae;g__Bilophila;s__Bilophila wadsworthia	99.17	0.864
k06	GCA_025145285.1	328813	Alistipes onderdonkii	Bacteria		Bacteroidota	Bacteroidia	Bacteroidales	Rikenellaceae	Alistipes	Alistipes onderdonkii	GCA_025145285.1	d__Bacteria;p__Bacteroidota;c__Bacteroidia;o__Bacteroidales;f__Rikenellaceae;g__Alistipes;s__Alistipes onderdonkii	98.39	0.898
k07	GCF_009696275.1	2652274	Eisenbergiella porci	Bacteria		Bacillota	Clostridia	Eubacteriales	Lachnospiraceae	Eisenbergiella	Eisenbergiella porci	GCF_009696275.1	d__Bacteria;p__Bacillota_A;c__Clostridia;o__Lachnospirales;f__Lachnospiraceae;g__Eisenbergiella;s__Eisenbergiella porci	96.6	0.756
k08	GCF_012317185.1	1522	[Clostridium] innocuum	Bacteria		Bacillota	Erysipelotrichia	Erysipelotrichales	Coprobacillaceae	Thomasclavelia	[Clostridium] innocuum	GCF_012317185.1	d__Bacteria;p__Bacillota;c__Bacilli;o__Erysipelotrichales;f__Erysipelotrichaceae;g__Clostridium_AQ;s__Clostridium_AQ innocuum	97.33	0.803
k09	GCF_000025985.1	272559	Bacteroides fragilis NCTC 9343	Bacteria		Bacteroidota	Bacteroidia	Bacteroidales	Bacteroidaceae	Bacteroides	Bacteroides fragilis	GCF_000025985.1	d__Bacteria;p__Bacteroidota;c__Bacteroidia;o__Bacteroidales;f__Bacteroidaceae;g__Bacteroides;s__Bacteroides fragilis	98.9	0.882
k10	GCF_000024265.1	479437	Eggerthella lenta DSM 2243	Bacteria		Actinomycetota	Coriobacteriia	Eggerthellales	Eggerthellaceae	Eggerthella	Eggerthella lenta	GCF_000024265.1	d__Bacteria;p__Actinomycetota;c__Coriobacteriia;o__Coriobacteriales;f__Eggerthellaceae;g__Eggerthella;s__Eggerthella lenta	99.18	0.902
k11	GCF_000313565.1	1034346	Dielma fastidiosa	Bacteria		Bacillota	Erysipelotrichia	Erysipelotrichales	Erysipelotrichaceae	Dielma	Dielma fastidiosa	GCF_000313565.1	d__Bacteria;p__Bacillota;c__Bacilli;o__Erysipelotrichales;f__Erysipelotrichaceae;g__Dielma;s__Dielma fastidiosa	98.18	0.871
k12	GCF_014131695.1	445974	Thomasclavelia ramosa DSM 1402	Bacteria		Bacillota	Erysipelotrichia	Erysipelotrichales	Coprobacillaceae	Thomasclavelia	Thomasclavelia ramosa	GCF_014131695.1	d__Bacteria;p__Bacillota;c__Bacilli;o__Erysipelotrichales;f__Coprobacillaceae;g__Thomasclavelia;s__Thomasclavelia ramosa	99.63	0.962
k13	GCF_000392875.1	1169286	Enterococcus faecalis ATCC 19433	Bacteria		Bacillota	Bacilli	Lactobacillales	Enterococcaceae	Enterococcus	Enterococcus faecalis	GCF_000392875.1	d__Bacteria;p__Bacillota;c__Bacilli;o__Lactobacillales;f__Enterococcaceae;g__Enterococcus;s__Enterococcus faecalis	98.59	0.896
k14	GCF_000172175.1	471870	Bacteroides intestinalis DSM 17393	Bacteria		Bacteroidota	Bacteroidia	Bacteroidales	Bacteroidaceae	Bacteroides	Bacteroides intestinalis	GCF_000172175.1	d__Bacteria;p__Bacteroidota;c__Bacteroidia;o__Bacteroidales;f__Bacteroidaceae;g__Bacteroides;s__Bacteroides intestinalis	97.75	0.84
k15	GCF_000466485.1	411472	[Clostridium] symbiosum ATCC 14940	Bacteria		Bacillota	Clostridia	Eubacteriales	Lachnospiraceae	Lachnoclostridium	[Clostridium] symbiosum	GCF_000466485.1	d__Bacteria;p__Bacillota_A;c__Clostridia;o__Lachnospirales;f__Lachnospiraceae;g__Clostridium_Q;s__Clostridium_Q symbiosum	98.84	0.851
k16	GCF_008281175.1	553973	[Clostridium] hylemonae DSM 15053	Bacteria		Bacillota	Clostridia	Eubacteriales	Lachnospiraceae	Lachnoclostridium	[Clostridium] hylemonae	GCF_008281175.1	d__Bacteria;p__Bacillota_A;c__Clostridia;o__Lachnospirales;f__Lachnospiraceae;g__Extibacter;s__Extibacter hylemonae	98.55	0.927
k17	GCF_003201875.1	1096246	Hungatella effluvii	Bacteria		Bacillota	Clostridia	Eubacteriales	Clostridiaceae	Hungatella	Hungatella effluvii	GCF_003201875.1	d__Bacteria;p__Bacillota_A;c__Clostridia;o__Lachnospirales;f__Lachnospiraceae;g__Hungatella;s__Hungatella effluvii	95.62	0.756
k18	GCF_013009555.1	357276	Phocaeicola dorei	Bacteria		Bacteroidota	Bacteroidia	Bacteroidales	Bacteroidaceae	Phocaeicola	Phocaeicola dorei	GCF_013009555.1	d__Bacteria;p__Bacteroidota;c__Bacteroidia;o__Bacteroidales;f__Bacteroidaceae;g__Phocaeicola;s__Phocaeicola dorei	99.05	0.849
k19	GCF_020297485.1	1531	Enterocloster clostridioformis	Bacteria		Bacillota	Clostridia	Eubacteriales	Lachnospiraceae	Enterocloster	Enterocloster clostridioformis	GCF_020297485.1	d__Bacteria;p__Bacillota_A;c__Clostridia;o__Lachnospirales;f__Lachnospiraceae;g__Enterocloster;s__Enterocloster clostridioformis	97.57	0.73
k20	GCF_000239295.1	411475	Flavonifractor plautii ATCC 29863	Bacteria		Bacillota	Clostridia	Eubacteriales	Oscillospiraceae	Flavonifractor	Flavonifractor plautii	GCF_000239295.1	d__Bacteria;p__Bacillota_A;c__Clostridia;o__Oscillospirales;f__Oscillospiraceae;g__Flavonifractor;s__Flavonifractor plautii	98.29	0.885
k21	GCF_000210075.1	657309	Bacteroides xylanisolvens XB1A	Bacteria		Bacteroidota	Bacteroidia	Bacteroidales	Bacteroidaceae	Bacteroides	Bacteroides xylanisolvens	GCF_000210075.1	d__Bacteria;p__Bacteroidota;c__Bacteroidia;o__Bacteroidales;f__Bacteroidaceae;g__Bacteroides;s__Bacteroides xylanisolvens	96.98	0.748
k22	GCF_000011065.1	226186	Bacteroides thetaiotaomicron VPI-5482	Bacteria		Bacteroidota	Bacteroidia	Bacteroidales	Bacteroidaceae	Bacteroides	Bacteroides thetaiotaomicron	GCF_000011065.1	d__Bacteria;p__Bacteroidota;c__Bacteroidia;o__Bacteroidales;f__Bacteroidaceae;g__Bacteroides;s__Bacteroides thetaiotaomicron	97.76	0.77
k23	GCA_025151215.1	411477	Parabacteroides merdae ATCC 43184	Bacteria		Bacteroidota	Bacteroidia	Bacteroidales	Tannerellaceae	Parabacteroides	Parabacteroides merdae	GCA_025151215.1	d__Bacteria;p__Bacteroidota;c__Bacteroidia;o__Bacteroidales;f__Tannerellaceae;g__Parabacteroides;s__Parabacteroides merdae	98.71	0.868
k24	GCF_000012825.1	435590	Phocaeicola vulgatus ATCC 8482	Bacteria		Bacteroidota	Bacteroidia	Bacteroidales	Bacteroidaceae	Phocaeicola	Phocaeicola vulgatus	GCF_000012825.1	d__Bacteria;p__Bacteroidota;c__Bacteroidia;o__Bacteroidales;f__Bacteroidaceae;g__Phocaeicola;s__Phocaeicola vulgatus	99.04	0.803
k25	GCF_003434055.1	358742	Enterocloster aldenensis	Bacteria		Bacillota	Clostridia	Eubacteriales	Lachnospiraceae	Enterocloster	Enterocloster aldenensis	GCF_003434055.1	d__Bacteria;p__Bacillota_A;c__Clostridia;o__Lachnospirales;f__Lachnospiraceae;g__Enterocloster;s__Enterocloster aldenensis	98.68	0.838
k26	GCA_025147485.1	820	Bacteroides uniformis	Bacteria		Bacteroidota	Bacteroidia	Bacteroidales	Bacteroidaceae	Bacteroides	Bacteroides uniformis	GCA_025147485.1	d__Bacteria;p__Bacteroidota;c__Bacteroidia;o__Bacteroidales;f__Bacteroidaceae;g__Bacteroides;s__Bacteroides uniformis	95.98	0.728
k27	GCF_900199375.1	1335613	Gordonibacter urolithinfaciens	Bacteria		Actinomycetota	Coriobacteriia	Eggerthellales	Eggerthellaceae	Gordonibacter	Gordonibacter urolithinfaciens	GCF_900199375.1	d__Bacteria;p__Actinomycetota;c__Coriobacteriia;o__Coriobacteriales;f__Eggerthellaceae;g__Gordonibacter;s__Gordonibacter urolithinfaciens	97.51	0.888
k28	GCA_019118525.1	2838476	Candidatus Bariatricus faecipullorum	Bacteria		Bacillota	Clostridia	Eubacteriales	Lachnospiraceae	Bariatricus	Candidatus Bariatricus faecipullorum	GCA_019118525.1	d__Bacteria;p__Bacillota_A;c__Clostridia;o__Lachnospirales;f__Lachnospiraceae;g__Bariatricus;s__Bariatricus faecipullorum	99.21	0.948
k29	GCF_014467075.1	411490	Anaerostipes caccae L1-92	Bacteria		Bacillota	Clostridia	Eubacteriales	Lachnospiraceae	Anaerostipes	Anaerostipes caccae	GCF_014467075.1	d__Bacteria;p__Bacillota_A;c__Clostridia;o__Lachnospirales;f__Lachnospiraceae;g__Anaerostipes;s__Anaerostipes caccae	99.65	0.938
k30	GCF_008121495.1	411470	[Ruminococcus] gnavus ATCC 29149	Bacteria		Bacillota	Clostridia	Eubacteriales	Lachnospiraceae	Mediterraneibacter	[Ruminococcus] gnavus	GCF_008121495.1	d__Bacteria;p__Bacillota_A;c__Clostridia;o__Lachnospirales;f__Lachnospiraceae;g__Ruminococcus_B;s__Ruminococcus_B gnavus	98.85	0.801
k31	GCF_008121495.1	411470	[Ruminococcus] gnavus ATCC 29149	Bacteria		Bacillota	Clostridia	Eubacteriales	Lachnospiraceae	Mediterraneibacter	[Ruminococcus] gnavus	GCF_008121495.1	d__Bacteria;p__Bacillota_A;c__Clostridia;o__Lachnospirales;f__Lachnospiraceae;g__Ruminococcus_B;s__Ruminococcus_B gnavus	98.34	0.749
k32	GCA_025145845.1	717959	Alistipes shahii WAL 8301	Bacteria		Bacteroidota	Bacteroidia	Bacteroidales	Rikenellaceae	Alistipes	Alistipes shahii	GCA_025145845.1	d__Bacteria;p__Bacteroidota;c__Bacteroidia;o__Bacteroidales;f__Rikenellaceae;g__Alistipes;s__Alistipes shahii	98.2	0.738
k33	GCA_025147325.1	449673	Bacteroides stercoris ATCC 43183	Bacteria		Bacteroidota	Bacteroidia	Bacteroidales	Bacteroidaceae	Bacteroides	Bacteroides stercoris	GCA_025147325.1	d__Bacteria;p__Bacteroidota;c__Bacteroidia;o__Bacteroidales;f__Bacteroidaceae;g__Bacteroides;s__Bacteroides stercoris	97.78	0.777
k34	GCF_020215665.1	2877527	Blautia sp. NBRC 113351	Bacteria		Bacillota	Clostridia	Eubacteriales	Lachnospiraceae	Blautia	Blautia sp. NBRC 113351	GCF_020215665.1	d__Bacteria;p__Bacillota_A;c__Clostridia;o__Lachnospirales;f__Lachnospiraceae;g__Blautia;s__Blautia sp001304935	98.77	0.854
k35	GCA_003096535.1	1628085	Agathobaculum butyriciproducens	Bacteria		Bacillota	Clostridia	Eubacteriales	Oscillospiraceae	Agathobaculum	Agathobaculum butyriciproducens	GCA_003096535.1	d__Bacteria;p__Bacillota_A;c__Clostridia;o__Oscillospirales;f__Butyricicoccaceae;g__Agathobaculum;s__Agathobaculum butyriciproducens	95.79	0.832
k36	GCF_002234575.2	208479	Enterocloster bolteae	Bacteria		Bacillota	Clostridia	Eubacteriales	Lachnospiraceae	Enterocloster	Enterocloster bolteae	GCF_002234575.2	d__Bacteria;p__Bacillota_A;c__Clostridia;o__Lachnospirales;f__Lachnospiraceae;g__Enterocloster;s__Enterocloster bolteae	97.05	0.793
k37	GCF_900104615.1	2897707	Merdimmobilis hominis	Bacteria		Bacillota	Clostridia	Eubacteriales	Oscillospiraceae	Merdimmobilis	Merdimmobilis hominis	GCF_900104615.1	d__Bacteria;p__Bacillota_A;c__Clostridia;o__Oscillospirales;f__Ruminococcaceae;g__Phocea;s__Phocea massiliensis	99.15	0.951
k38	GCF_000327285.1	1211819	Holdemania massiliensis AP2	Bacteria		Bacillota	Erysipelotrichia	Erysipelotrichales	Erysipelotrichaceae	Holdemania	Holdemania massiliensis	GCF_000327285.1	d__Bacteria;p__Bacillota;c__Bacilli;o__Erysipelotrichales;f__Erysipelotrichaceae;g__Holdemania;s__Holdemania massiliensis	98.51	0.918
k39	GCF_003697165.2	866789	Escherichia coli DSM 30083 = JCM 1649 = ATCC 11775	Bacteria		Pseudomonadota	Gammaproteobacteria	Enterobacterales	Enterobacteriaceae	Escherichia	Escherichia coli	GCF_003697165.2	d__Bacteria;p__Pseudomonadota;c__Gammaproteobacteria;o__Enterobacterales;f__Enterobacteriaceae;g__Escherichia;s__Escherichia coli	99.69	0.952
k40	GCF_900291975.1	3014267	Agathobaculum massiliense	Bacteria		Bacillota	Clostridia	Eubacteriales	Oscillospiraceae	Agathobaculum	Agathobaculum massiliense	GCF_900291975.1	d__Bacteria;p__Bacillota_A;c__Clostridia;o__Oscillospirales;f__Butyricicoccaceae;g__Agathobaculum;s__Agathobaculum sp900291975	99.24	0.833
k41	GCA_000020605.1	515619	Agathobacter rectalis ATCC 33656	Bacteria		Bacillota	Clostridia	Eubacteriales	Lachnospiraceae	Agathobacter	Agathobacter rectalis	GCA_000020605.1	d__Bacteria;p__Bacillota_A;c__Clostridia;o__Lachnospirales;f__Lachnospiraceae;g__Agathobacter;s__Agathobacter rectalis	96.59	0.707
k42	GCF_900129135.1	1122155	Lactonifactor longoviformis DSM 17459	Bacteria		Bacillota	Clostridia	Eubacteriales	Clostridiaceae	Lactonifactor	Lactonifactor longoviformis	GCF_900129135.1	d__Bacteria;p__Bacillota_A;c__Clostridia;o__Lachnospirales;f__Lachnospiraceae;g__Lactonifactor;s__Lactonifactor longoviformis	97.23	0.846
k43	GCF_005121165.3	2093857	Dysosmobacter welbionis	Bacteria		Bacillota	Clostridia	Eubacteriales	Oscillospiraceae	Dysosmobacter	Dysosmobacter welbionis	GCF_005121165.3	d__Bacteria;p__Bacillota_A;c__Clostridia;o__Oscillospirales;f__Oscillospiraceae;g__Dysosmobacter;s__Dysosmobacter welbionis	98.94	0.863
k44	GCA_003112755.1	2108523	Lawsonibacter asaccharolyticus	Bacteria		Bacillota	Clostridia	Eubacteriales	Oscillospiraceae	Lawsonibacter	Lawsonibacter asaccharolyticus	GCA_003112755.1	d__Bacteria;p__Bacillota_A;c__Clostridia;o__Oscillospirales;f__Oscillospiraceae;g__Lawsonibacter;s__Lawsonibacter asaccharolyticus	98.7	0.746
k46	GCF_004843545.1	197614	Streptococcus pasteurianus	Bacteria		Bacillota	Bacilli	Lactobacillales	Streptococcaceae	Streptococcus	Streptococcus pasteurianus	GCF_004843545.1	d__Bacteria;p__Bacillota;c__Bacilli;o__Lactobacillales;f__Streptococcaceae;g__Streptococcus;s__Streptococcus pasteurianus	98.96	0.898
k47	GCF_003315195.1	40545	Sutterella wadsworthensis	Bacteria		Pseudomonadota	Betaproteobacteria	Burkholderiales	Sutterellaceae	Sutterella	Sutterella wadsworthensis	GCF_003315195.1	d__Bacteria;p__Pseudomonadota;c__Gammaproteobacteria;o__Burkholderiales;f__Burkholderiaceae_A;g__Sutterella;s__Sutterella wadsworthensis	98.62	0.928
