# Supplementary material for: Rationally-defined microbial consortia suppress multidrug-resistant proinflammatory Enterobacteriaceae via ecological control
Source: Research Square preprint supplement (doi:10.21203/rs.3.rs-3462622/v1), 2023-10-23
Supplement: Supplementary file 5 [file b2c1170730fbcac23100ae5d.xlsx]

## Sheet: Primer list
Primer for bacterial isolation
	Target	Primer name	Sequence (5'-3')	Ref
	16S rRNA (universal primer)	27Fmod	AGRGTTTGATYMTGGCTCAG	2017 Atarashi
		1492R	GGYTACCTTGTTACGACTT
Primer for faecal bacterial DNA qPCR quantification
	Target	Primer name	Sequence (5'-3')	Ref
	Kp-2H7	Sca4_298_F	AGCACTAGCGGCTGTGGTAT	2017 Atarashi
		Sca4_298_R	ACTTACTCGGGCCCTTGATT	2017 Atarashi
	Clostridioides difficile (St. 630)	tpi-F	AAAGAAGCTACTAAGGGTACAAA	2004 Lemee
		tpi-R	CATAATATTGGGTCTATTCCTAC	2004 Lemee
	Campylobacter upsaliensis	Cupsaliensis_2F	AAATCAGCCATGTTGCGGTG	This study
		Cupsaliensis_2R	TCAACTCCCATGGTGTGACG	This study
	f01_42H6_Bifidobacterium longum	f01_42H6_Fw	AGCTTTCGCGGTATGGGATG	This study
		f01_42H6_Rv	GCCGTATCTCAGTCCCAATG	This study
	f02_42I8_Bacteroides xylanisolvens	f02_42I8_Fw	CAAACTAAAGATGGCGACCG	This study
		f02_42I8_Rv	GCGGTTTTAATATACTATCGG	This study
	f03_43B2_Bacteroides fragilis_A	f03_43B2_Fw	ATCCAACCTGCCCTTTACTC	This study
		f03_43B2_Rv	CCCATCCTTTACCGGAATCC	This study
	f04_43B6_Bacteroides uniformis	f04_43B6_Fw	TAGGCGGACGCTTAAGTCAG	This study
		f04_43B6_Rv	CTGCCTCTACTGTACTCAAG	This study
	f05_43D4_Bacteroides thetaiotaomicron	f05_43D4_Fw	CCCGATGGTATAATCAGACC	This study
		f05_43D4_Rv	ACCTCACCAACTGCCTAATG	This study
	f07_42J6_Bacteroides	f07_42J6_Fw	TTGCAAACTGGAGATGGCGA	This study
		f07_42J6_Rv	CTCATGCGGGAGAAATATACC	This study
	f09_43F1_Parabacteroides goldsteinii	f09_43F1_Fw	GAAAGTCGGACTAATACCGC	This study
		f09_43F1_Rv	CCTCACCAACTATCTAATGG	This study
	f10_43J3_Ruminococcus_B gnavus	f10_43J3_Fw	TTGAAGCCTTGGTGACTGAG	This study
		f10_43J3_Rv	TTAGCAGCCGTTTCCAACTG	This study
	f11_43I8_Blautia_A sp003471165	f11_43I8_Fw	GGGAATCACTTCATTGAGAC	This study
		f11_43I8_Rv	GACTGTTATCCCCCTGTATA	This study
	f12_42H4_Faecalimonas umbilicata	f12_42H4_Fw	ACACGTGATCGCATGATCGAG	This study
		f12_42H4_Rv	CCAACTAGCTAATCAGACGC	This study
	f13_42H8_Enterocloster sp900538485	f13_42H8_Fw	ACAGCTTCGCATGGAGCAG	This study
		f13_42H8_Rv	CTGATCGTCGCCTTGGTAAG	This study
	f14_42L4_Faecalimonas phoceensis	f14_42L4_Fw	ACAGTGCTGCATGGCACAGTG	This study
		f14_42L4_Rv	TCGCCTTGGTAGGCCGTTAC	This study
	f16_43M1_Anaerostipes hadrus	f16_43M1_Fw	CTGAAGATTTGGTGATTGAG	This study
		f16_43M1_Rv	ACCATGCGGTGCTGTGGTCTTA	This study
	f17_42I7_Blautia_A caecimuris	f17_42I7_Fw	ATGGAAGCTTCGGTGGAAATAG	This study
		f17_42I7_Rv	CACACTGAATCATGCAGTCC	This study
	f18_42I2_Enterocloster bolteae	f18_42I2_Fw	GCGAAGCAAGTCTGAAGTGA	This study
		f18_42I2_Rv	CTCCGACACTCTAGCAAAAC	This study
	f19_43G2_Blautia_A caecimuris	f19_43G2_Fw	CGGTTGAAGTCGTTATAATCC	This study
		f19_43G2_Rv	CCATGCAGTCCCGTGCGCTTA	This study
	f20_43G1_Clostridium_AQ innocuum	f20_43G1_Fw	CTTGCTTCCAAAGAGACTTAG	This study
		f20_43G1_Rv	GCAGTTATCCCGGACACATG	This study
	f21_42A8_Blautia sp001304935	f21_42A8_Fw	AAGTGGATCTCTTCGGATTG	This study
		f21_42A8_Rv	TTATGCGGTATTAGCAGCCA	This study
	f22_43C3_Enterocloster asparagiformis	f22_43C3_Fw	GATTCTGAGATGACTGAGTG	This study
		f22_43C3_Rv	GCAGTCATTTCTAACTGTTG	This study
	f23_42K4_Schaedlerella glycyrrhizinilytica_A	f23_42K4_Fw	TACCGGATTTCTTCGGGATG	This study
		f23_42K4_Rv	GATCATGCAATCCTGTGGTC	This study
	f24_42I4_Eisenbergiella tayi	f24_42I4_Fw	TCGGTATAACTTAGTGGCGG	This study
		f24_42I4_Rv	ACAACCATGCGGTTCCGTGC	This study
	f26_42K2_Flavonifractor plautii	f26_42K2_Fw	TTTATCGCTCTGAGATGGCC	This study
		f26_42K2_Rv	TCAACCTCTCAGTCCGGCTA	This study
	f28_43A3_Intestinibacter bartlettii	f28_43A3_Fw	GTACACACGGATAACATACC	This study
		f28_43A3_Rv	ACCAACTAGCTAATCAGACG	This study
	f29_43J8_Ruminococcus_B gnavus	f29_43J8_Fw	CTTCGGATTGAAGCAATTG	This study
		f29_43J8_Rv	TTAGCAGCCGTTTCCAACTG	This study
	f30_43A5_Massiliomicrobiota sp002160865	f30_43A5_Fw	TATCCCACGGGATAGCACAG	This study
		f30_43A5_Rv	TCTCAGGCCGGCTACGCATC	This study
	f31_43J5_Anaerostipes sp000508985	f31_43J5_Fw	TTCCTTAATGACTGAGTGGC	This study
		f31_43J5_Rv	CACACCGAATCATGCGATTC	This study
	f32_42A7_Blautia coccoides	f32_42A7_Fw	TGAAGTCTTTGTGACTGAGC	This study
		f32_42A7_Rv	ATGCGGTATTAGCAGTCA	This study
	f33_43N2_Erysipelatoclostridium ramosum	f33_43N2_Fw	GTGCCTCAAAGCACTGGTAG	This study
		f33_43N2_Rv	TCTCAGGTCGGCTACGCATC	This study
	f34_43K4_Veillonella parvula_A	f34_43K4_Fw	TAAGCTATCACTGAAGGAGG	This study
		f34_43K4_Rv	CAGACCGGCTACTGATCATC	This study
	f35_42L8_Fusobacterium_A ulcerans	f35_42L8_Fw	ACTTGATCCTTCGGGTGAAG	This study
		f35_42L8_Rv	ATGTTGTCCCAGTCTGTAAG	This study
	f37_42G1_Escherichia coli	f37_42G1_Fw	GCTGCTTTGCTGACGAGTGG	This study
		f37_42G1_Rv	TTGGTCTTGCGACGTTATGC	This study
	Universal(1387F+1492R) (16S qPCR)	Uni_1387_Fw	CTTGTACACACCGCCCGTCA	This study
		Uni_1492_Rv	TACGGCTACCTTGTTACGACTT	This study
Primer for deletion
	Target	Primer name	Sequence (5'-3')	Ref
	Kp_ΔcsgD	Kp_csgD_upper	TCTGCCCTCCTGCGCCGCCGGCGGACCGCTGACGGCGCACGTTTACCCGCAATTAACCCTCACTAAAGGGCGG	This study
		Kp_csgD_lower	TTATTCATTTAACCACCATGGCGGTGGGTAACAGCTAAGGAGAGTTTTAATAATACGACTCACTATAGGGCTC	This study
		Kp_csgD_Fw	AACGGCTGAGTACGGTTGAG	This study
		Kp_csgD_Rv	GGTGGCGAATTTGATCCGTG	This study
	Kp_ΔrpoS	Kp_rpoS_upper	CAAAGAAAAAGGCCCCGACTTTCGAGGGGGCCTTTTTGACAGAAAACGTCAATTAACCCTCACTAAAGGGCGG	This study
		Kp_rpoS_lower	TGTGCCGTGGAAGGTGCTTTGCTCAGGGATCACGGGTAGGAGCCACCTTTTAATACGACTCACTATAGGGCTC	This study
		Kp_rpoS_Fw	GCAAGCGGAAGGGAAAATCG	This study
		Kp_rpoS_Rv	CCAGGCGTCGTTTGTTGATG	This study
	Kp_ΔlsrR	Kp_lsrR_upper	GGCCGCGCAATAGCGAACATATGATCTAAATTTTTATAAGAGTTCAATTTAATTAACCCTCACTAAAGGGCGG	This study
		Kp_lsrR_lower	ACAGGTAACTCATGACATGCGCCTCGCTGTTGTCGCGCGGCGCCAGGCCGTAATACGACTCACTATAGGGCTC	This study
		Kp_lsrR_Fw	AATGGGCCAGCGATGAAAGA	This study
		Kp_lsrR_Rv	CCCGGCATCTAACGCTAACA	This study
	Kp_ΔlsrACDB	Kp_lsrACDB_upper	GAAGTCCTTCCCCTCTTTGATATCGTCTAAATCTGCCATCTCATCCTCCGAATTAACCCTCACTAAAGGGCGG	This study
		Kp_lsrACDB_lower	TTTTGAACATTATTAAATTTAAAAATCATTTGTTCAAACGAGGCGCGACGTAATACGACTCACTATAGGGCTC	This study
		Kp_lsrACDB_Fw	CGACAGGTCGATACGCTCAA	This study
		Kp_lsrACDB_Rv	AACTGTGATCTTCGCACGGT	This study
	Kp_ΔnarGΔnarZ	Kp_narG_upper	TACGCTCTCCTGTACCTGGTCGTTGCCTTCGCCGTCTAACCAGTTAATGTAATTAACCCTCACTAAAGGGCG	This study
		Kp_narG_lower	TGAGTAAATTCCTGGACCGGTTTCGCTACTTCAAACAGAAGGGTGAAACCTAATACGACTCACTATAGGGCTC	This study
		Kp_narG_Fw	TGTACCTGGTCGTTGCCTTC	This study
		Kp_narG_Rv	TGGACCGGTTTCGCTACTTC	This study
	Kp_ΔnarGΔnarZ	Kp_narZ_upper	ATGAGTAAACTTCTGGATCGCTTTCGCTACTTTAAGCAGAAGGGCGAGACAATTAACCCTCACTAAAGGGCG	This study
		Kp_narZ_lower	TTTTCGCCTCCTGTACCTGATCGCGACCTTCGTCATCCAGCCAGGCAATATAATACGACTCACTATAGGGCTC	This study
		Kp_narZ_Fw	GACATCATCGGAGCAGGAGA	This study
		Kp_narZ_Rv	GTACCTGATCGCGACCTTCG	This study
	Kp_ΔgntR	Kp_gntR_upper	TTAAATTGATCCGCCCGGTGACAATGTGAAACCTAAATCTAACATCTTAGAATTAACCCTCACTAAAGGGCG	This study
		Kp_gntR_lower	ATGAAAAAGAAAAGACCCGTACTTCAGGATGTAGCCGATCTTGTCGGCGTTAATACGACTCACTATAGGGCTC	This study
		Kp_gntR_Fw	TCCATTCGTGCCAGATGTGA	This study
		Kp_gntR_Rv	TCAGGATGTAGCCGATCTTGTC	This study
	Kp_ΔgntK	Kp_gntK_upper	TAGTGACTGCCTTTGTTGATCACCTCGATGGTGCTGGCCACCACGCCTTCAATTAACCCTCACTAAAGGGCG	This study
		Kp_gntK_lower	TGAGCACGACTAACCATGATCACCACGTCTATGTCCTGATGGGCGTTTCCTAATACGACTCACTATAGGGCTC	This study
		Kp_gntK_Fw	AGCAATACCGAGCCGACTG	This study
		Kp_gntK_Rv	CGCTTTGAGCACGACTAACC	This study
Primer for fecal bacterial RNA qPCR
	Target	Primer name	Sequence (5'-3')	Ref
	Kp-2H7_recA	Kp_recA_qPCR_Fw	TTAAACAGGCCGAATTCCAG	2018 Gomes
		Kp_recA_qPCR_Rv	CCGCTTTCTCAATCAGCTTC	2018 Gomes
	Kp-2H7_gntK	Kp_gntK_qPCR_Fw	AAGGAGAGGTTCGGATTGCC	This study
		Kp_gntK_qPCR_Rv	AAGGTGTCGCTGATCGTCTG	This study
	Kp-2H7_gntU	Kp_gntU_qPCR_Fw	GGTCTTTCGCCATTCCCTGA	This study
		Kp_gntU_qPCR_Rv	TTCGAGTTTATCGGCCACCC	This study
	Kp-2H7_edd	Kp_edd_qPCR_Fw	AACATGCTCTTCAGGGAGGC	This study
		Kp_edd_qPCR_Rv	TAACCAGGCCAAAACCGACA	This study
	Kp-2H7_eda	Kp_eda_qPCR_Fw	ACTGCATACCCAGCATCAGC	This study
		Kp_eda_qPCR_Rv	GGGTCTTACCGAATCCCTGC	This study
